# Supplementary material for: The in vitro and in vivo effects of constitutive light expression on a bioluminescent strain of the mouse enteropathogen Citrobacter rodentium
Source: PeerJ. 2016 Jun 22;4:e2130. doi: 10.7717/peerj.2130 (PMC4924136; doi:10.7717/peerj.2130)
Supplement: Data S1 [file peerj-04-2130-s001.xlsx]

## Sheet: Raw data for Figure 2
Changes in bioluminescence (as relative light units per mL of culture) for C. rodentium ICC169 and ICC180 when grown in rich media- 7 biological replicates
Hours	ICC169							ICC180
0	100	100	100	100	100	100	100	3000	2380	2520	1700	1960	2280	1840
1	100		100	100	100	100	100	4200		5460	5020	7420	6120	5700
2	100	100	100	100	100	100	100	6820	10020	6800	6320	8980	11140	8840
3	100	100	100	100	100	100	100	59460	73060	50460		101700	93800	78480
4	100	100	100	100	100	100	100	422280	624170	534520	417720	416220	617970	590790
5	100	100	100	100	100	100	100	730680	790290	809660	590850	741490	849540	635700
6	100	100	100	100	100	100	100	1121560	1009060	961740	761600	1058740	1275750	740290
7	100	100	100	100	100	100	100	1257950	1053410	1834260	1346620	1130630	1438490	1580260
8	100	100	100	100	100	100	100	819830	744790	1834260	1108710	1060960	1077760	906090
Changes in bacterial numbers (as colony forming units per mL of culture) for C. rodentium ICC169 and ICC180 when grown in rich media - 7 biological replicates
Hours	ICC169							ICC180
0	12700000	18300000	12700000	13300000	11700000	13700000	14700000	10700000	16700000	13000000	10000000	16300000	13000000	13000000
1	10700000		9330000	11300000	13000000	13700000	17000000	15000000		10000000	16000000	15300000	17000000	16000000
2	14700000	93300000	16000000	23700000	26300000	26000000	90300000	15000000	37300000	22300000	22000000	24700000	28000000	25300000
3	173000000	253000000	160000000	193000000	157000000	167000000	247000000	177000000	163000000	143000000	157000000	180000000	197000000	457000000
4	460000000	1570000000	283000000	667000000	867000000	1400000000	2230000000	480000000	1070000000	410000000	733000000	1000000000	1300000000	1470000000
5	1500000000	1970000000	933000000	1200000000	1600000000	1930000000	2470000000	1500000000	1970000000	1330000000	1130000000	1330000000	1600000000	2300000000
6	2000000000	2470000000	1300000000	1730000000	1730000000	2330000000	2570000000	2500000000	3070000000	1770000000	1970000000	1670000000	2870000000	3000000000
7	1930000000	4130000000	2530000000	1030000000	2430000000	2570000000	2670000000	1870000000	2900000000	2370000000	2330000000	2400000000	3030000000	3330000000
8	2700000000	4200000000	2470000000	2430000000	2470000000	3130000000	3230000000	2300000000	3670000000	2330000000	2570000000	2600000000	3300000000	3070000000

## Sheet: Raw data for Figure 3
Changes in bioluminescence (as relative light units per mL of culture) for C. rodentium ICC169 and ICC180 when grown in minimal media- 6 biological replicates
Hours	ICC169							ICC180
0	100	100	100	100	100	100	100	2920	4920	4980	5720	6820	7520
2	100		100	100	100	100	100	8100	27700	28240	31660	33600	33500
4	100	100	100	100	100	100	100	14800	28940	31700	35160	40920	37600
6	100	100	100	100	100	100	100	21720	47140	51900	52520	52180	46480
8	100	100	100	100	100	100	100	42640	77880	99420	97420	89120	85340
10	100	100	100	100	100	100	100	104060	176930	182690	140940	162010	143490
12	100	100	100	100	100	100	100	217700	298680	307760	227560	211460	255050
14	100	100	100	100	100	100	100	346090	433010	564050	423840	464680	382710
Changes in bacterial numbers (as colony forming units per mL of culture) for C. rodentium ICC169 and ICC180 when grown in minimal media - 6 biological replicates
Hours	ICC169						ICC180
0	3000000	14300000	15700000	13300000	17000000	9330000	4670000	11700000	13300000	16700000	11000000	9670000
2	6670000	9000000	15000000	20700000	15000000	15300000	7330000	13700000	16300000	11000000	18000000	18000000
4	23300000	96700000	56700000	73300000	41700000	22000000	15700000	30300000	36300000	60000000	26300000	20300000
6	80000000	120000000	160000000	70000000	167000000	120000000	20000000	73300000	96700000	30000000	90000000	96700000
8	150000000	113000000	340000000	210000000	337000000	223000000	73300000	143000000	157000000	147000000	140000000	177000000
10	183000000	833000000	900000000	370000000	500000000	280000000	66700000	227000000	257000000	283000000	167000000	213000000
12	700000000	533000000	967000000	800000000	633000000	293000000	107000000	177000000	667000000	567000000	433000000	283000000
14	333000000	1000000000	1130000000	767000000	1070000000	767000000	167000000	600000000	767000000	600000000	467000000	800000000

## Sheet: Raw data for Figure 4
Data for survival curve (0=alive; 1=dead)
Hours post-infection	PBS	ICC169	ICC180
67	0
67	0
67	0
67	0
67	0
19		1
26		1
26		1
44		1
44		1
44		1
44		1
44		1
44		1
50		1
67		1
19			1
26			1
26			1
44			1
44			1
44			1
44			1
50			1
50			1
67			1
CFU counts from caterpillars
169	180
12300000	21000000
5000000	9170000
2500000	8000000
3830000	12200000
5170000	12800000
3000000	7830000
10500000	16200000
6670000	17800000
3000000	7170000
150000000	383000000
Infectious dose:
129000000	49500000
CHI values
Hours	ICC169										ICC180										Mixed infection
0	9	9	9	9		9	9	9	9	9	9	9	9	9	9	9	9	9	9	9	9	9	9	9	9	9	9	9	9	9
4	8	7	7	7	7	7	7	7	8	7	7	7	7	7	7	7	7	7	7	7	7	7	7	7	5	7	7	7	7	7
9	7	7	7	7	4	7	5	7	7	7	7	7	7	7	7	7	7	7	7	7	7	7	7	7	5	5	5	7	7	7
22	3	3	3	3	0	5	5	5	3	3	3	3	3	3	3	3	0	3	0	3	3	3	3	3	3	3	3	3	3	3
25	3	3	3	3	0	3	3	3	3	3	3	0	0	3	3	3	0	3	0	3	0	3	3	3	0	3	3	0	3	3

## Sheet: Raw data for Figure 5
Colony forming units per gram stool recovered from mice infected with 1:1 mix of ICC180 and ICC169
Day post infection	169												180
1		3330	11000000	35700	207000	120000000	16700	11300	60300	2330000	5000000			5670	20700000	41000	197000	83300000	60000	10700	29700	11000000
2		753000	1010000	10700	1330000	92700000	170000	26700	1350000	123000000	123000000			180000	193000	2670	1270000	17300000	157000	8330	147000	53300000
3		3770000	8230000	2620000	18800000	12700000	6470000	12500000	8600000	72300000	1670000			867000	3430000	413000	2530000	7670000	1870000	800000	1070000	17700000
6		74700000	111000000	119000000	157000000	13700000	41300000	202000000	120000000	131000000	89300000			1930000	9330000	10700000	9670000	7330000	12300000	8000000	10300000	8670000
7		78600000	35900000	103000000	138000000	158000000	24000000	124000000	31800000	50600000	63300000			1430000	2770000	3500000	8670000	35700000	3700000	2630000	1230000	2700000
8		61900000	54500000	39100000	50200000	46300000	19600000	21100000	7300000	37400000	15100000			1400000	2200000	867000	1830000	3400000	2100000	210000	367000	633000
9		72600000	140000000	59500000	128000000	62700000	4570000	13800000	8170000	45900000	8670000			700000	3500000	533000	2300000	7330000	767000	233000	167000	800000
10		15500000	14200000	16600000	25400000	21900000	457000	16900000	5590000	99700000	9270000			193000	800000	360000	567000	467000	43300	113000	80000	307000
13							667	3580000	5670	6670	391000								100	17000	100	100
14		100	21000	100	100	1330	9330	613000	1330	667	4000			100	100	100	100	100	100	40300	100	100
15		100	100	100	100	100								100	100	100	100	100
Colony forming units per gram stool recovered from mice infected with either ICC180 or ICC169
Day	ICC169						ICC180
1	1230000	250000	132000	550000			758000	22000000	208000	40000000	442000	2670000
2	1330000	1230000	2330000	3170			15400000	4000000	71700	808000000	292000	42500000
3	107000000	4170000	36700000	750000			85000000	40000000	32500000	1290000000	19200000	983000000
6	600000000	233000000	2130000000	733000000			425000000	400000000	275000000	1040000000	475000000	558000000
7
8	583000000	90000000	46700000	633000000			11000000	85800000	75800000	658000000	158000000	59200000
9	217000000	28300000	283000000	450000000			10300000	17500000	52500000	650000000	127000000	94200000
10	102000000	15500000	157000000	533000000			7830000	18300000	8080000	342000000	130000000	342000000
13	2120000	90000	10300000	3500000			2000	283000	3420	5670000	12400	2420000
14	167	1500	1200000	108000			2420	9830	10	4330000	2500	31700
Competition experiments values
Days Post-Infection	169												180
1	0.608696	0.514706	0.465726	0.761179	0.919492	1.26	0.240385	0.919471	1.75994	0.183566		0.480769	1.64286	1.94286	2.14719	1.31375	1.08756	0.793651	4.16	1.08758	0.568201	5.44762		2.08
2	2.22984	3.66204	4.55603	3.5	0.921053	4.67788	0.939034	2.76923	7.98514	2.0012	1.42534	2.46302	0.448463	0.273072	0.219489	0.285714	1.08571	0.213772	1.06492	0.361111	0.125233	0.4997	0.701587	0.406006
3		3.80288	2.0983	5.54637	6.49342	1.44565	2.99794	13.5577	6.97716	3.54318	2.5209	0.100626		0.262958	0.476576	0.180298	0.154002	0.691729	0.333562	0.073759	0.143325	0.282232	0.396683	9.93778
6		33.8233	10.375	9.78906	14.2112	1.63068	2.90021	21.851	10.0217	13.1139	6.42206	2.27376		0.029565	0.096386	0.102155	0.070367	0.61324	0.344803	0.045765	0.099783	0.076255	0.155713	0.439801
7		47.9622	11.3539	25.7917	13.9327	3.86799	5.60551	40.7607	22.2895	16.2286		2.05529		0.02085	0.088075	0.038772	0.071774	0.258532	0.178396	0.024533	0.044864	0.061619		0.48655
8		38.7083	21.6629	39.5096	23.9432	11.9069	8.06319	87.0467	17.229	51.0577	15.1603	5.75226		0.025834	0.046162	0.02531	0.041766	0.083985	0.12402	0.011488	0.058042	0.019586	0.065962	0.173845
9		90.7917	34.9583	97.5625	48.5815	7.47727	5.15468	51.0577	42.4038	49.6154		7.5		0.011014	0.028605	0.01025	0.020584	0.133739	0.193998	0.019586	0.023583	0.020155		0.133333
10		70.0302	15.5312	40.4444	39.2721	41	9.11982	128.942	60.4327	281.325		20.0481		0.01428	0.064386	0.024725	0.025463	0.02439	0.109651	0.007755	0.016547	0.003555		0.04988
13							576.923	182.393	4903.85	5769.23		145.014							0.001733	0.005483	0.000204	0.000173		0.006896
14			18375			1166.67	8076.92	13.1524	1153.85	576.923		3461.54			5.44e-05			0.000857	0.000124	0.076032	0.000867	0.001733		0.000289
15

## Sheet: Raw data for Figure 6
Bioluminescence from abdominal region from indiviual mice
Day	1:1 mix of ICC180 and ICC169						ICC180						ICC169
0	9670000000	5920000	52500000	8120000	4700000	2630000	28400000	3360000	3940000	1390000	17900000	1410000	2340000	1910000	2000000
3	4560000	112000000	9120000	66800000	25100000		109000000	25600000	62600000	695000000	74400000	667000000	2350000	1730000	2000000
6	24600000	23200000	15600000	3310000	8270000		22100000	80400000	65500000	54900000	111000000	72100000	4560000	3460000	4180000
10	4160000	19500000	3140000	2920000	5530000		2300000	10800000	28400000	169000000	19500000	7600000	4540000	3710000	4190000
13	3260000	2860000	2940000	2610000	2130000		2620000	2070000	2130000	12100000	2940000	4040000	9430000	6450000	6640000
17	1780000	1550000	1570000				1780000	1650000	1530000				1830000	1670000	1570000

## Sheet: Raw data for Suppl Figure 4
Relative light unit (RLU) readings from individually infected caterpillars
Hours post-infection	ICC169										ICC180
0	0	2	4	6	10	0	2	4	6	10	27361	28798	30438	13422	27027	15035	26423	31889	28207	12804
4	0	2	4	6	10	0	2	4	6	10	10586	4240	5126	10072	15675	6094	8372	10982	3560	3476
9	0	2	4	6	10	0	2	4	6	10	4448	5272	4300	3478	17723	4672	6622	12460	12976	4850
19	0	2	4	6	10	0	2	4	6	10	3652	3382	2228	2832	9088	4746	5400	8832	202655	2474
24	0	2	4	6	10	0	2	4	6	10	3006	2932	1858	3268	9922	5012	6550	11220	199701	1804

## Sheet: BIOLOG raw data - ICC169
Data File	J:\Service\Customer\400\411\ShID_561\data\Assays\10138\crod_SIDx6450xICC169___1_37_138_209_Marx25x2013_A_01A.oka
Set up Time	Mar 25 2013 3:42 PM
Position	1-A
Plate Type	PM01-
Strain Type	NOT APPLICABLE
Sample Number
Strain Name	Crod
Strain Number	SID_6450_ICC169
Other
Hour	A01	A02	A03	A04	A05	A06	A07	A08	A09	A10	A11	A12	B01	B02	B03	B04	B05	B06	B07	B08	B09	B10	B11	B12	C01	C02	C03	C04	C05	C06	C07	C08	C09	C10	C11	C12	D01	D02	D03	D04	D05	D06	D07	D08	D09	D10	D11	D12	E01
0	20	9	14	3	1	0	0	2	6	4	10	16	13	2	2	4	0	0	0	2	0	0	9	19	19	2	1	9	0	4	0	0	0	3	11	17	19	4	2	0	0	1	0	4	4	0	10	22	20
0.25	20	11	6	11	0	0	4	4	8	6	17	22	16	3	3	2	0	0	1	5	2	6	13	22	16	4	5	12	0	0	0	0	2	7	13	23	19	7	2	3	3	10	2	3	6	7	13	23	26
0.5	22	14	10	4	1	2	5	5	10	9	22	26	20	5	8	3	0	1	5	9	4	7	15	26	20	5	5	15	0	5	0	5	7	10	20	27	22	8	5	5	5	11	3	7	11	13	16	30	25
0.75	20	15	8	3	0	1	7	5	10	8	23	27	20	4	6	3	0	1	5	9	3	8	14	26	19	5	3	14	0	3	0	4	5	10	18	28	22	6	3	6	3	9	2	7	9	13	15	30	26
1	22	12	9	4	0	3	8	6	10	8	24	27	21	4	7	3	0	2	6	9	4	8	15	26	21	5	4	15	0	5	0	5	6	10	17	28	24	7	5	7	6	10	2	8	10	12	16	30	30
1.25	23	13	10	5	1	3	7	6	9	9	23	26	23	6	8	4	0	3	5	8	3	6	15	25	22	7	5	15	0	5	0	5	6	8	16	26	26	8	6	8	6	9	1	7	7	11	15	28	31
1.5	24	15	12	6	3	6	11	8	12	11	27	31	24	6	9	6	0	5	8	12	6	9	18	29	23	8	5	16	0	7	2	8	9	11	19	33	26	9	7	8	7	12	2	9	11	14	18	33	31
1.75	27	19	16	10	8	10	15	12	16	15	29	33	28	10	13	9	4	9	10	15	9	11	21	32	28	12	10	19	5	11	4	10	13	15	20	34	30	12	11	12	10	15	4	12	14	16	19	35	34
2	31	22	18	13	14	13	17	18	23	18	32	38	30	17	14	12	8	10	13	16	15	14	23	38	29	17	11	20	8	12	7	15	15	17	25	37	33	12	12	16	11	18	6	16	17	22	20	39	41
2.25	33	22	19	17	17	17	22	25	29	20	33	42	33	23	17	14	11	11	14	17	21	16	24	45	30	18	14	21	11	11	8	20	16	20	30	38	37	10	14	19	14	21	5	19	20	26	22	41	45
2.5	37	24	22	20	23	22	29	31	34	23	35	45	38	28	18	15	11	15	15	18	26	19	27	49	33	19	18	23	15	14	11	24	17	24	36	40	44	13	17	20	19	23	6	22	24	30	23	44	50
2.75	38	28	26	25	28	28	35	35	38	26	37	45	41	34	19	17	13	18	15	21	30	19	31	53	36	19	25	26	17	16	14	30	21	30	37	45	49	14	18	20	22	24	7	22	26	31	24	48	53
3	39	31	30	30	33	33	41	38	44	29	39	46	45	38	20	18	13	20	15	22	31	20	33	54	39	20	30	30	19	19	16	34	23	34	37	47	55	13	19	21	24	24	6	21	24	31	23	51	58
3.25	40	35	34	34	40	39	47	42	49	33	43	48	47	43	22	18	15	26	18	26	33	22	36	57	46	22	36	37	21	23	19	38	28	41	38	54	62	16	20	23	26	27	10	23	27	34	25	56	63
3.5	39	37	37	36	43	42	49	43	53	35	45	46	49	43	20	17	14	27	17	28	33	21	38	56	48	21	38	39	20	23	21	40	31	44	37	57	63	15	20	22	25	26	8	22	26	33	24	59	62
3.75	40	40	41	41	48	48	54	43	59	39	47	48	53	45	21	17	14	32	17	30	33	22	40	57	54	21	43	42	21	24	24	42	36	49	38	62	68	16	19	23	25	26	8	24	28	33	25	62	64
4	40	43	45	43	54	54	58	43	64	43	50	48	57	47	21	17	14	36	18	34	34	21	43	57	58	22	47	46	21	28	28	42	41	54	38	66	72	15	20	23	26	26	9	24	28	33	26	66	64
4.25	41	48	49	49	59	58	63	44	70	47	54	50	61	50	22	19	15	41	19	37	34	22	48	59	65	23	51	50	21	31	33	43	48	59	39	70	79	17	20	23	27	28	9	25	29	34	27	69	66
4.5	40	52	54	51	61	61	66	44	74	50	59	48	63	52	21	17	14	44	18	42	34	22	51	59	70	21	54	52	20	34	36	42	55	62	38	73	80	15	19	23	24	26	9	24	28	34	26	73	64
4.75	43	59	63	57	68	67	70	47	79	57	64	51	69	59	24	19	17	53	19	47	36	24	57	62	84	25	61	61	23	39	46	44	61	69	41	78	87	18	23	25	28	29	11	26	31	36	28	78	67
5	43	65	67	62	70	69	73	47	82	61	67	49	71	62	23	20	16	60	19	47	37	23	60	62	112	24	65	66	22	39	55	44	60	73	40	81	92	18	22	25	28	28	10	26	30	35	28	82	67
5.25	40	64	71	65	72	71	75	47	83	63	70	49	71	64	22	18	14	71	18	49	35	23	61	62	146	23	66	70	20	40	61	43	64	77	40	84	92	16	20	23	26	27	9	25	29	35	27	86	64
5.5	45	71	79	74	80	79	83	50	90	70	79	51	79	70	26	21	19	90	21	54	40	25	69	63	177	26	74	81	24	48	65	46	71	87	43	92	101	20	24	27	29	30	12	28	33	38	30	90	69
5.75	45	75	86	85	84	86	86	52	94	75	83	52	89	72	27	22	20	109	22	56	41	26	73	65	193	27	78	87	25	52	69	47	74	93	43	96	106	20	26	28	30	30	12	28	34	39	30	92	69
6	43	78	92	100	86	91	90	52	98	78	88	53	102	76	26	21	18	122	21	60	41	26	78	65	201	26	81	92	24	53	74	46	77	101	43	101	108	19	24	27	29	30	12	28	33	39	29	96	66
6.25	45	82	100	120	91	98	94	53	103	82	93	52	121	78	27	22	19	131	23	60	43	25	83	65	211	27	85	98	25	58	80	46	82	109	43	108	115	21	25	28	30	30	12	27	33	39	29	98	70
6.5	44	85	108	135	93	105	99	55	106	86	100	53	131	81	27	23	20	139	23	65	44	26	89	67	216	27	89	103	25	64	87	47	87	117	44	112	118	21	25	28	30	31	13	29	34	40	30	101	69
6.75	47	91	117	149	101	114	104	58	111	92	105	54	143	86	29	25	22	146	24	68	48	27	95	68	224	30	95	108	27	70	94	49	93	126	45	119	126	23	28	31	31	32	14	31	36	42	32	104	72
7	45	94	123	158	102	118	108	59	114	96	109	54	150	89	28	23	21	152	24	71	48	27	99	70	225	27	97	111	25	75	100	48	96	132	45	125	126	21	25	29	31	32	14	30	36	41	32	108	68
7.25	47	100	131	169	108	124	113	63	118	100	114	55	161	93	29	25	23	159	26	76	52	28	105	70	232	30	104	116	27	84	106	49	100	140	46	131	135	23	28	31	33	33	14	31	37	42	33	109	73
7.5	44	102	135	175	109	127	116	68	120	103	120	54	165	94	27	23	20	163	25	78	51	27	111	70	233	28	104	119	25	86	112	48	100	145	45	135	136	20	24	28	29	31	13	30	35	41	32	112	68
7.75	46	107	142	184	116	133	121	76	125	108	126	55	173	99	29	25	23	169	26	83	56	27	118	73	238	29	111	124	27	96	120	51	104	152	47	141	142	23	27	30	32	33	14	32	37	43	33	115	72
8	45	111	146	189	118	136	126	81	127	112	130	56	179	104	29	25	22	175	26	87	57	29	124	75	239	29	116	128	27	101	126	51	106	158	46	146	143	22	28	30	32	33	15	31	38	43	33	119	69
8.25	46	117	151	195	123	141	130	88	131	113	135	55	185	107	30	25	23	179	26	91	59	28	131	76	244	30	120	131	27	110	133	50	109	164	47	151	152	24	28	31	33	34	15	32	38	43	33	119	73
8.5	48	122	156	201	129	146	135	94	135	118	141	57	191	112	32	27	25	185	27	96	63	30	137	78	246	30	126	136	28	118	139	52	113	170	48	156	156	25	30	31	35	35	16	33	39	44	35	124	74
8.75	46	124	157	203	130	149	138	98	136	118	145	55	194	113	30	26	23	187	26	98	63	29	140	78	247	29	128	139	27	121	142	51	112	173	46	160	158	22	27	30	32	33	14	32	37	43	33	126	72
9	47	128	160	207	135	152	142	104	139	120	150	55	199	117	30	26	23	191	28	100	66	28	145	80	250	31	133	142	28	127	146	51	115	176	47	164	165	23	28	31	33	34	15	32	38	43	34	129	74
9.25	47	133	165	211	138	157	147	110	142	125	154	58	203	121	33	27	26	196	29	104	71	31	149	84	250	31	138	146	30	129	150	53	118	182	49	168	166	24	30	31	34	36	17	33	41	46	35	133	71
9.5	49	137	168	215	143	161	152	117	145	125	158	58	208	125	32	27	26	200	29	107	73	32	153	85	254	32	143	150	30	136	154	54	120	186	50	171	172	25	31	33	35	36	16	34	41	45	37	135	75
9.75	46	138	168	216	144	163	154	120	146	125	160	55	210	126	31	25	23	202	27	108	73	28	155	85	253	29	144	150	27	138	155	52	119	187	47	173	175	23	27	31	33	33	15	32	38	43	33	136	73
10	47	142	171	219	148	167	158	126	149	126	164	56	213	130	31	26	24	206	27	111	76	29	158	87	255	32	148	153	29	143	157	52	121	191	48	177	179	24	29	31	33	34	15	33	38	44	35	139	74
10.25	47	145	174	221	151	171	163	132	151	129	167	57	216	133	32	27	24	209	28	113	80	30	162	91	256	31	153	157	29	146	161	54	124	194	48	180	182	24	29	32	34	36	16	33	41	46	36	141	74
10.5	46	147	175	223	155	173	166	137	154	129	168	55	219	136	30	26	24	212	27	114	81	30	164	92	257	31	156	157	29	149	162	52	124	196	48	182	186	24	28	31	33	35	16	33	38	44	35	144	74
10.75	46	151	177	225	158	176	172	142	158	132	171	57	222	139	33	27	26	215	28	116	85	30	167	96	258	32	160	161	30	150	166	53	127	200	49	186	187	24	30	33	34	36	16	34	41	46	36	147	73
11	48	155	179	228	161	180	175	148	159	132	173	57	226	143	33	28	26	218	28	119	88	31	169	98	260	32	165	163	30	155	168	54	129	202	49	188	194	26	30	33	35	36	16	34	41	46	36	148	76
11.25	48	158	181	229	165	182	179	154	163	135	175	58	227	144	34	29	27	221	30	120	92	31	171	103	261	32	169	165	30	156	170	55	132	206	50	191	195	26	31	33	35	37	18	34	41	47	37	152	75
11.5	48	159	182	231	168	185	182	159	164	135	177	57	230	148	33	28	27	223	29	121	94	31	172	104	262	33	172	167	30	159	171	53	132	206	49	193	200	26	31	33	36	36	17	35	40	47	36	152	76
11.75	47	161	183	231	170	186	185	164	167	136	177	57	231	149	33	27	27	226	29	122	96	31	175	108	261	32	174	169	30	159	173	55	134	209	50	196	200	26	30	34	35	36	18	34	41	47	37	156	74
12	50	165	185	234	175	190	189	169	170	137	179	58	235	153	35	30	29	229	30	124	99	32	175	112	264	35	179	172	32	164	175	55	136	211	51	199	206	28	33	35	36	38	18	35	42	48	37	158	78
12.25	48	166	186	235	176	192	192	174	173	139	181	58	235	155	35	29	29	232	30	125	103	33	178	115	262	33	181	174	32	163	176	56	139	213	50	201	207	27	33	34	36	38	18	36	43	48	38	160	76
12.5	50	168	187	237	179	195	196	180	176	139	183	59	238	157	35	30	30	234	32	127	106	33	180	120	263	34	184	175	32	165	178	56	141	215	52	204	211	28	33	35	37	38	19	36	43	48	39	163	78
12.75	46	165	186	236	180	195	197	181	177	139	182	56	236	157	33	28	26	234	28	126	106	30	180	121	262	31	185	174	29	163	176	54	139	215	48	204	210	24	29	33	34	35	16	33	40	46	36	163	74
13	48	169	189	238	183	198	201	187	180	141	184	57	239	160	34	29	28	238	29	128	109	32	182	127	264	33	189	178	30	166	179	56	143	218	51	207	214	26	31	35	36	37	18	35	41	48	38	166	76
13.25	48	171	190	240	186	201	203	191	182	141	185	58	242	162	34	29	27	240	29	129	112	32	183	130	264	34	191	179	31	169	180	55	146	219	50	208	218	26	32	34	35	37	18	35	42	48	37	168	76
13.5	48	172	192	242	189	204	207	195	186	144	187	59	243	165	36	30	30	242	31	131	116	33	186	136	265	35	195	181	32	170	182	57	149	222	52	212	220	28	33	35	37	38	19	36	44	49	39	171	78
13.75	47	171	191	241	189	204	208	197	187	144	188	58	243	167	35	30	28	242	30	130	118	33	186	140	264	34	196	181	31	169	181	56	148	222	51	213	219	27	31	34	35	37	17	35	42	48	39	173	76
14	47	171	191	241	190	205	210	200	189	144	188	57	243	167	34	28	27	243	29	131	120	31	187	142	263	32	197	181	28	167	181	55	149	223	50	213	221	24	29	33	34	36	17	34	41	47	37	174	75
14.25	49	175	194	243	195	208	213	205	192	146	189	58	247	172	35	29	29	246	31	132	122	33	188	146	266	34	201	185	32	173	183	56	153	225	51	215	227	28	33	35	37	38	18	35	42	48	37	175	78
14.5	46	173	193	243	194	209	215	206	193	146	189	57	245	173	33	28	28	246	30	132	126	32	188	150	263	32	201	185	29	170	183	55	152	226	51	216	225	24	30	34	35	37	17	35	41	48	37	177	75
14.75	49	176	195	245	198	212	219	210	196	149	191	58	249	177	36	30	29	249	31	134	128	33	191	154	267	34	205	188	31	175	186	56	157	229	51	218	230	28	32	34	37	38	18	36	43	49	38	179	79
15	48	176	196	244	199	213	221	211	200	151	192	59	247	178	36	29	31	250	32	135	132	35	193	160	264	33	205	189	31	171	185	57	157	230	53	220	228	26	32	34	36	39	19	36	43	50	38	182	74
15.25	47	176	196	245	201	214	222	214	200	151	192	57	249	180	35	29	29	251	30	135	133	33	193	162	265	33	207	189	30	173	186	56	158	230	51	220	231	26	30	34	35	37	18	35	42	48	38	182	76
15.5	47	177	197	246	203	216	225	216	203	154	193	59	250	182	36	30	32	253	32	137	138	34	194	168	265	34	209	191	31	173	187	57	161	232	52	223	232	27	32	35	37	39	19	37	43	48	39	186	76
15.75	48	179	198	248	206	218	227	219	204	153	194	57	254	185	36	30	33	254	31	138	139	33	196	170	268	35	212	193	32	177	189	56	162	232	51	224	236	28	32	35	36	38	18	36	43	49	38	185	78
16	48	179	198	248	206	219	229	220	208	156	195	60	252	185	36	29	34	256	31	139	142	34	198	174	265	34	213	194	31	175	190	57	163	233	53	225	234	27	32	34	36	38	19	36	44	49	39	188	75
16.25	47	179	199	248	208	220	230	222	208	156	195	56	253	188	35	29	35	256	30	139	143	32	197	177	267	34	215	194	31	177	189	56	162	233	51	226	237	26	31	34	35	36	18	35	42	47	37	187	76
16.5	47	179	199	249	209	222	232	223	211	158	196	59	253	188	36	30	39	258	31	140	147	34	200	182	266	33	216	196	31	176	191	56	164	235	53	227	237	27	32	34	36	38	18	35	43	49	40	191	76
16.75	49	181	201	250	213	224	235	227	214	160	198	60	256	191	38	31	45	259	32	142	151	35	201	185	268	36	219	199	33	179	192	58	166	236	53	230	240	29	34	36	37	40	20	37	45	50	40	193	78
17	47	179	200	249	212	224	235	227	216	161	198	60	255	190	35	28	47	260	31	142	153	35	201	189	264	32	218	199	31	175	191	57	165	237	53	230	238	26	31	34	35	39	19	35	45	49	40	196	74
17.25	49	183	203	251	215	227	239	229	218	162	199	60	259	194	38	31	54	262	32	144	155	35	204	190	268	35	222	203	33	181	195	58	168	237	53	231	242	29	34	36	37	40	19	36	46	51	39	194	77
17.5	49	182	202	253	216	228	239	231	218	161	199	58	260	194	37	31	58	263	31	144	157	34	204	193	269	35	223	203	32	182	194	56	168	238	52	232	244	28	33	36	37	39	18	36	46	49	39	196	78
17.75	45	181	201	251	216	228	239	231	220	162	199	58	257	194	36	29	60	263	31	143	160	34	204	197	266	32	222	203	31	178	193	57	166	238	52	233	241	25	30	33	35	38	19	35	44	48	38	199	74
18	50	184	204	253	221	232	242	234	223	163	201	60	262	197	39	32	68	266	33	146	163	35	206	200	270	36	227	207	33	186	196	58	169	239	54	234	246	30	35	38	38	40	19	37	48	50	40	200	79
18.25	48	182	204	253	220	231	243	234	224	164	201	59	260	196	37	30	72	266	32	145	165	34	207	203	267	34	226	207	31	182	195	57	170	240	53	235	244	27	32	35	36	39	19	36	48	50	40	201	76
18.5	50	184	205	254	223	234	245	237	227	165	203	60	263	199	39	32	78	268	33	148	168	36	208	207	270	37	228	209	33	186	198	59	171	241	55	236	249	30	34	37	38	40	20	38	52	51	41	202	79
18.75	46	182	203	252	222	233	244	236	229	164	202	60	260	197	37	30	81	267	33	146	170	35	208	211	266	33	226	208	32	180	196	58	169	242	53	238	244	26	31	35	35	39	19	36	52	51	40	205	74
19	50	185	206	255	225	236	247	239	231	166	204	60	264	200	39	32	87	270	34	148	174	35	210	212	270	36	231	211	33	186	199	59	172	242	54	239	250	29	34	38	38	41	20	38	60	51	40	206	79
19.25	47	184	205	254	225	235	247	238	232	165	203	58	264	200	37	30	89	269	32	148	174	34	210	213	268	35	230	212	32	185	197	57	171	243	53	239	249	28	32	36	36	38	19	36	62	50	39	206	76
19.5	49	184	207	255	227	236	248	240	233	165	205	59	266	201	38	31	94	271	31	148	176	35	211	216	270	35	231	214	33	188	200	57	171	243	53	240	251	29	34	36	38	39	19	36	69	50	40	206	77
19.75	48	183	207	255	227	238	250	240	235	166	205	58	265	201	38	31	98	272	32	148	179	34	211	218	269	34	232	214	32	187	200	57	172	244	54	242	251	28	33	35	36	38	19	37	73	50	40	208	77
20	48	183	207	256	228	238	249	240	236	165	205	59	265	202	37	31	101	272	32	149	181	35	212	221	268	35	231	215	32	187	200	57	172	244	53	243	251	27	33	34	36	39	20	36	77	50	40	210	76
20.25	49	185	208	256	230	240	251	242	238	167	207	60	267	203	39	32	107	273	33	150	184	36	212	223	269	35	234	217	33	189	202	59	173	245	54	244	252	29	34	37	38	40	20	37	83	51	41	211	77
20.5	50	186	209	258	232	241	252	242	239	167	208	60	268	204	40	33	111	274	34	151	186	36	213	227	271	37	236	220	34	192	202	60	174	246	54	246	255	31	35	38	38	40	21	37	89	52	41	213	78
20.75	46	184	208	256	231	240	252	242	240	166	208	59	267	203	37	30	112	274	32	149	187	35	213	228	268	34	234	218	31	188	201	58	172	246	53	245	252	26	32	34	35	38	19	36	91	50	40	214	75
21	48	185	209	258	233	241	253	243	241	167	207	60	269	204	39	31	117	275	32	150	189	35	214	229	270	36	236	220	33	191	202	58	173	246	53	247	255	29	34	36	37	39	19	36	98	50	40	215	77
21.25	47	185	209	257	233	242	254	243	241	167	208	59	268	205	38	31	121	276	32	150	191	35	214	232	269	34	236	221	32	190	202	58	173	247	53	248	254	27	31	34	35	38	20	36	101	50	40	216	74
21.5	48	184	209	258	234	242	253	244	243	166	209	59	269	204	37	30	123	276	32	150	192	35	214	234	270	36	237	222	33	191	202	57	173	247	53	249	255	29	32	35	37	38	20	36	105	50	40	218	76
21.75	47	184	210	257	235	243	255	244	244	167	209	60	268	204	38	30	127	276	33	150	196	35	214	236	267	33	237	222	31	190	203	59	173	248	54	250	254	26	32	35	35	39	20	36	108	50	41	220	74
22	49	186	211	259	237	244	256	245	245	168	210	60	271	207	39	32	133	277	33	152	197	36	216	237	271	37	239	224	33	194	205	59	175	249	55	252	258	29	34	36	37	40	21	37	115	52	41	221	78
22.25	47	185	210	258	236	244	256	245	246	167	210	60	269	206	38	30	135	277	32	151	197	35	214	239	267	34	237	223	31	190	203	59	173	249	53	253	255	27	31	35	35	39	19	36	116	51	41	223	74
22.5	49	187	212	259	239	246	257	247	247	168	211	60	272	208	40	32	142	279	33	152	200	36	215	240	271	37	240	226	33	196	206	59	175	250	54	253	259	29	34	37	37	40	21	36	122	52	42	222	77
22.75	46	185	212	258	238	246	257	246	247	167	211	60	270	207	38	30	144	279	32	151	201	35	215	242	269	35	239	225	32	193	204	59	174	250	53	254	258	27	32	35	36	39	19	36	124	51	40	224	75
23	50	187	213	261	241	248	258	248	248	168	212	60	273	208	40	33	151	280	33	153	203	37	216	243	272	38	241	228	34	197	206	59	176	251	55	256	260	31	35	38	38	40	21	37	130	51	41	225	77
23.25	45	184	211	259	238	246	258	247	250	168	212	61	269	207	37	30	153	279	34	152	205	37	216	246	267	34	239	226	32	191	204	59	174	252	54	257	256	27	31	35	34	38	20	37	131	52	41	228	73
23.5	49	187	213	260	242	248	260	248	251	168	213	61	273	209	40	32	160	281	34	153	207	36	217	246	271	38	242	229	33	197	207	60	176	252	55	258	260	29	34	37	38	41	21	38	137	53	42	228	77
23.75	47	185	212	259	240	248	259	248	251	169	213	61	270	209	39	31	163	280	33	152	208	36	217	248	267	34	240	228	32	193	205	60	175	252	55	258	258	27	33	35	36	40	20	37	138	52	42	230	74
Data File	J:\Service\Customer\400\411\ShID_561\data\Assays\10144\crod_SIDx6450xICC169___1_37_144_209_Marx27x2013_A_01A.oka
Set up Time	Mar 27 2013 5:31 PM
Position	1-A
Plate Type	PM01-
Strain Type	NOT APPLICABLE
Sample Number
Strain Name	Crod
Strain Number	SID_6450_ICC169
Other
Hour	A01	A02	A03	A04	A05	A06	A07	A08	A09	A10	A11	A12	B01	B02	B03	B04	B05	B06	B07	B08	B09	B10	B11	B12	C01	C02	C03	C04	C05	C06	C07	C08	C09	C10	C11	C12	D01	D02	D03	D04	D05	D06	D07	D08	D09	D10	D11	D12	E01
0	18	8	7	2	0	0	0	1	6	6	13	23	16	3	4	0	0	0	0	4	3	5	11	21	16	4	2	10	0	2	0	0	4	5	14	26	17	4	4	0	2	5	0	3	6	5	11	27	18
0.25	18	7	9	3	0	1	3	5	9	14	21	24	17	2	3	0	0	0	6	6	5	7	12	30	19	3	2	9	0	5	0	3	4	9	19	22	20	9	4	1	6	7	2	5	11	14	14	26	25
0.5	19	8	6	3	0	2	3	4	8	6	21	25	19	2	3	0	0	0	4	7	4	9	13	25	20	3	4	11	0	5	0	4	4	9	16	26	20	5	6	1	3	9	1	5	6	12	16	28	26
0.75	20	10	8	3	1	2	5	6	10	9	23	26	21	4	5	1	0	0	6	9	5	10	14	25	20	4	3	12	0	6	0	5	5	9	14	27	24	6	6	4	6	10	2	6	8	13	16	29	28
1	21	11	9	3	2	4	7	6	10	9	25	29	21	4	6	2	0	2	6	10	5	11	16	26	20	5	4	13	0	7	0	6	7	10	16	28	24	7	7	5	7	10	2	7	7	12	17	30	28
1.25	20	11	10	3	1	4	7	7	12	10	26	30	21	4	7	3	0	2	6	10	6	11	16	28	20	5	4	13	0	7	0	8	8	11	18	31	25	7	7	6	6	10	2	9	9	15	18	32	27
1.5	22	13	13	6	3	7	9	9	14	13	28	32	24	6	8	4	2	4	8	12	7	12	18	29	23	8	6	16	2	9	1	9	11	13	19	32	26	8	8	7	8	12	4	9	11	15	19	34	31
1.75	26	17	16	9	8	10	12	13	19	18	31	35	27	11	11	8	5	7	11	15	11	14	21	32	27	10	9	19	6	12	4	12	14	15	22	35	31	11	11	11	11	14	6	12	13	18	22	37	34
2	31	18	19	11	13	15	15	19	26	20	32	40	29	19	13	12	7	8	12	16	18	14	23	37	27	15	12	18	9	12	6	16	15	17	28	37	33	10	14	14	13	17	5	14	14	22	22	40	39
2.25	35	20	20	14	19	22	22	26	33	23	35	45	34	26	15	16	10	11	14	16	25	18	26	45	30	16	18	21	14	14	8	22	18	23	37	42	38	11	19	16	18	21	5	19	18	28	24	45	45
2.5	36	23	23	20	25	27	30	31	40	27	38	46	39	33	15	17	12	15	15	20	30	19	30	49	34	16	25	25	17	17	11	30	20	29	40	46	46	12	21	17	23	22	6	20	19	31	25	49	51
2.75	37	28	28	25	31	33	36	35	47	31	39	48	44	39	17	19	13	18	17	22	33	21	34	51	38	19	32	31	20	19	15	35	24	35	41	51	52	13	22	18	25	23	8	21	21	33	25	54	56
3	37	29	31	28	36	39	41	36	51	33	42	47	48	42	17	19	14	20	16	23	32	20	35	51	42	17	37	35	21	20	16	39	27	40	41	54	58	13	22	18	24	23	9	21	21	32	25	57	59
3.25	36	31	33	31	39	43	45	37	55	35	44	48	48	44	16	19	12	23	17	26	32	20	37	52	43	18	41	39	20	21	18	41	30	45	40	58	60	12	21	18	24	23	8	21	19	32	26	61	59
3.5	37	34	37	35	45	48	49	37	60	40	46	48	51	48	17	20	13	26	18	29	32	20	39	52	50	19	46	44	20	24	21	43	34	50	40	61	66	14	22	18	24	23	9	22	20	32	26	65	62
3.75	39	39	43	40	51	54	53	38	66	44	49	48	56	51	18	20	15	30	18	31	33	21	42	53	56	20	51	49	21	27	25	44	38	56	40	65	72	15	24	19	26	24	10	22	21	34	26	69	64
4	39	40	47	44	57	59	58	39	71	48	53	49	56	52	17	20	14	37	18	34	34	21	46	54	59	19	56	53	21	29	29	45	44	62	40	69	75	15	23	19	25	23	10	22	21	34	28	72	63
4.25	39	45	54	49	63	66	64	42	78	53	61	49	60	55	19	21	16	42	19	37	35	22	50	54	64	20	60	58	22	33	35	45	52	67	42	74	81	16	24	21	27	26	11	24	21	35	28	77	65
4.5	39	49	59	55	68	71	69	45	83	58	61	50	63	59	19	22	16	46	19	43	35	22	54	56	71	20	64	64	22	36	41	45	57	72	42	78	82	16	24	21	26	25	11	24	21	36	28	82	65
4.75	41	54	68	61	74	78	75	48	89	66	67	51	69	62	21	23	18	51	21	48	39	25	60	58	88	22	70	72	24	38	50	47	64	80	43	83	89	17	27	23	28	28	13	26	24	38	30	88	67
5	41	57	73	65	78	83	78	49	93	69	70	50	70	63	20	22	17	57	20	48	37	23	63	57	115	22	72	76	23	39	54	46	68	85	42	85	92	17	26	22	27	26	11	25	21	37	29	91	66
5.25	40	61	78	70	82	91	81	51	97	74	74	50	73	69	20	22	16	72	19	51	38	23	68	57	148	22	76	83	22	40	59	45	71	90	42	91	97	17	25	21	26	25	11	24	22	36	28	92	66
5.5	42	65	85	81	87	99	87	55	104	82	81	53	82	72	22	23	18	94	22	54	39	24	72	59	172	23	80	90	24	45	66	47	76	98	45	97	102	18	27	23	29	27	13	26	24	39	30	97	67
5.75	43	71	92	101	93	105	92	60	110	90	88	54	96	77	24	26	21	113	24	58	42	26	76	61	185	25	86	99	26	50	73	49	81	107	46	105	107	20	29	25	30	30	14	28	26	41	32	101	68
6	41	71	97	119	94	104	95	60	111	87	91	53	112	79	21	23	18	123	22	58	39	24	81	61	194	22	87	102	24	50	76	48	83	112	44	108	109	18	26	23	28	28	12	26	24	39	30	102	67
6.25	42	76	105	137	99	105	98	64	115	90	97	54	125	83	23	24	20	133	23	61	42	25	85	61	202	23	92	109	24	54	83	49	87	121	45	113	113	18	27	24	29	28	13	27	24	40	31	105	68
6.5	44	82	114	153	104	108	103	67	120	96	102	53	137	87	24	26	21	142	24	64	44	26	89	61	211	24	98	114	26	59	91	49	92	128	46	117	120	20	30	27	30	29	14	27	25	40	31	108	69
6.75	43	84	118	164	107	113	105	69	123	100	108	53	146	90	23	24	19	148	23	67	44	25	94	62	216	24	100	114	24	63	96	48	94	137	45	124	124	19	28	25	29	28	13	26	24	39	32	110	70
7	45	92	128	177	114	117	112	75	129	105	115	57	157	96	27	27	23	156	26	73	49	28	102	66	222	27	108	114	29	74	106	52	100	145	48	132	130	22	31	28	32	32	16	30	28	42	35	114	72
7.25	43	92	132	184	115	120	113	78	131	107	120	55	163	98	24	25	20	161	24	74	48	26	106	66	224	25	109	112	25	78	111	50	101	149	46	137	132	20	29	25	30	29	14	28	26	41	33	116	69
7.5	44	99	138	192	121	125	117	82	135	112	125	54	171	102	25	27	21	166	24	78	51	26	113	68	230	26	114	120	28	85	118	50	103	156	46	141	137	21	30	26	32	30	14	28	26	41	32	119	71
7.75	45	102	142	198	126	129	121	90	141	116	131	57	177	106	26	28	22	173	26	83	54	29	120	70	231	27	119	123	28	93	127	52	107	164	48	149	140	22	32	28	30	32	17	30	28	42	35	124	70
8	44	105	145	203	128	132	124	92	142	118	135	56	182	108	24	27	22	177	25	86	55	27	124	71	234	25	121	123	27	96	131	52	108	168	47	154	145	21	29	27	32	31	15	29	27	41	34	125	71
8.25	44	110	149	209	133	138	129	98	147	122	141	57	186	112	26	27	23	183	27	90	58	29	130	74	237	28	128	128	29	103	136	52	111	174	48	159	150	21	32	28	32	32	16	30	29	42	34	129	71
8.5	45	115	152	214	137	143	132	102	148	123	145	55	193	116	25	28	22	187	25	92	61	28	135	73	242	27	131	135	29	108	140	53	113	177	48	161	156	22	32	28	33	32	15	28	27	42	33	129	72
8.75	45	118	156	217	141	147	135	109	152	126	150	58	197	119	27	29	23	191	26	96	63	29	139	77	244	28	136	142	29	114	145	53	115	182	49	167	161	23	32	28	33	32	16	31	28	42	34	134	73
9	47	124	159	221	145	152	140	115	155	129	155	58	202	122	28	29	25	196	28	99	67	30	144	80	247	29	141	147	30	118	149	54	118	187	50	173	165	24	34	29	34	34	17	32	31	45	37	137	75
9.25	46	127	161	225	150	156	143	122	159	132	159	59	205	126	28	29	26	200	28	101	70	31	147	83	246	29	144	151	31	123	153	56	120	191	50	177	168	24	34	30	34	34	18	32	31	45	37	141	73
9.5	47	130	163	227	153	158	146	123	160	131	161	57	209	128	27	29	23	203	26	102	71	29	149	84	249	28	147	154	29	125	153	54	120	193	49	179	172	23	33	29	34	32	17	30	29	44	35	141	74
9.75	47	134	167	230	157	163	150	130	164	135	166	60	212	131	29	30	26	207	29	105	76	31	154	88	251	29	152	157	31	129	157	55	123	197	50	184	176	25	34	29	36	34	18	32	31	45	38	146	75
10	49	137	169	232	160	166	154	135	167	136	168	59	216	135	29	30	26	210	28	108	78	31	155	90	253	30	156	160	32	132	160	56	125	200	51	188	181	25	35	31	35	34	18	32	32	45	38	148	76
10.25	48	140	170	234	164	170	157	141	171	138	171	60	218	137	29	31	26	213	29	109	81	32	158	94	253	30	160	163	32	135	163	56	127	202	51	191	184	26	35	30	36	34	19	33	32	45	38	151	76
10.5	45	140	170	234	165	170	159	144	172	138	173	59	219	137	27	29	23	214	27	109	82	28	159	95	252	28	161	163	29	135	163	54	127	203	49	193	185	22	32	27	32	32	17	31	30	44	37	152	73
10.75	46	142	171	236	169	173	162	149	174	139	174	58	221	139	27	29	23	217	26	110	84	29	161	98	254	27	165	166	28	138	164	55	128	206	49	196	188	23	32	28	33	32	16	31	29	43	36	153	74
11	47	147	174	237	172	177	166	154	178	142	177	59	224	143	29	30	25	221	28	113	87	30	164	103	256	29	169	169	30	140	168	55	131	209	50	199	193	24	33	29	34	33	18	31	30	45	36	157	76
11.25	47	148	176	240	175	180	170	159	182	142	179	59	227	145	29	30	25	224	28	114	90	30	166	105	257	30	173	172	31	143	169	55	132	211	51	200	196	24	34	29	34	33	17	32	31	45	37	159	76
11.5	46	150	175	240	176	182	173	162	183	143	179	57	228	146	28	29	23	225	26	114	92	30	167	108	258	28	175	173	29	143	170	55	133	212	49	202	198	22	32	28	33	32	17	31	29	43	36	160	75
11.75	46	151	177	241	180	184	177	168	186	145	181	58	229	148	29	30	25	227	28	117	95	30	169	112	257	29	177	174	30	145	173	56	136	215	50	205	201	24	33	30	33	33	17	32	30	45	37	163	75
12	46	154	179	242	182	186	180	171	189	146	182	57	231	151	29	30	25	230	28	117	97	29	171	115	258	29	180	176	30	146	173	56	138	216	50	207	204	24	33	29	34	33	17	32	30	44	36	165	76
12.25	47	155	180	244	186	189	183	177	193	149	185	60	232	153	30	31	26	231	29	119	101	31	173	120	258	30	184	178	31	150	175	57	140	219	51	209	207	24	35	30	34	34	18	33	32	45	38	168	74
12.5	46	156	180	244	187	190	186	180	194	149	186	59	234	154	29	29	24	234	28	120	103	30	173	123	260	29	185	179	30	150	176	56	141	220	51	211	210	24	33	30	33	33	18	31	31	45	37	170	76
12.75	47	158	182	246	191	193	189	185	199	151	188	61	236	155	31	31	26	235	29	122	107	32	176	127	260	29	189	181	30	152	178	58	145	222	52	213	212	24	35	30	35	35	18	33	33	46	39	172	75
13	47	159	182	245	192	195	191	187	200	152	189	59	237	158	30	30	25	238	29	122	109	31	177	131	261	30	190	182	31	152	178	57	146	224	51	215	214	25	33	29	34	33	18	32	31	45	39	174	76
13.25	48	161	185	248	196	197	194	191	204	155	190	60	238	161	31	31	26	239	30	124	112	31	178	136	261	30	193	184	31	155	180	58	150	225	52	217	217	26	35	30	35	34	18	33	32	46	40	176	76
13.5	48	163	185	248	198	200	196	192	206	155	191	59	242	163	31	31	27	242	29	125	114	32	179	138	265	31	196	187	32	155	180	57	151	226	52	217	221	26	35	31	36	34	19	33	32	46	39	177	78
13.75	49	165	187	249	201	203	199	197	210	158	194	61	242	166	32	32	28	244	30	127	118	33	182	143	265	32	199	189	32	158	182	59	154	228	53	220	223	26	37	32	36	36	20	34	34	48	40	181	78
14	50	165	187	250	203	204	203	200	212	159	194	62	243	169	33	33	29	245	30	128	120	33	183	147	265	33	201	189	33	159	183	59	155	230	53	222	225	27	37	32	37	36	21	34	34	48	41	182	79
14.25	48	165	188	250	205	205	204	202	214	161	194	60	243	170	32	32	27	246	30	128	122	32	183	150	264	31	201	191	32	159	184	58	155	230	53	222	225	25	36	31	35	35	19	33	33	46	40	183	77
14.5	47	165	187	250	205	206	205	204	215	160	194	59	244	173	30	31	26	247	29	128	124	30	183	153	265	30	203	191	31	157	184	58	156	230	51	223	227	25	34	30	35	34	17	31	31	46	39	185	78
14.75	49	168	190	252	209	209	210	207	219	164	196	61	247	176	33	33	29	249	31	132	129	34	186	157	267	32	206	195	32	161	186	59	160	233	53	225	231	28	37	32	37	36	21	34	35	48	41	188	79
15	49	168	190	252	210	210	210	209	220	165	196	59	248	177	31	32	28	250	29	131	130	32	186	161	267	31	208	196	32	161	186	59	160	233	52	226	232	26	36	32	36	35	19	33	34	46	39	188	78
15.25	48	169	191	253	212	212	213	212	223	167	197	60	247	180	32	32	28	251	30	133	133	33	188	165	265	32	209	197	31	162	187	59	161	234	52	227	232	25	36	31	35	35	20	33	34	46	39	190	76
15.5	49	168	191	253	214	213	214	215	225	168	199	61	249	181	32	32	28	252	30	134	137	33	189	170	266	32	209	199	32	163	187	59	162	235	53	231	234	27	36	31	36	36	19	33	34	47	40	193	78
15.75	49	169	192	254	215	215	216	216	228	170	199	60	250	184	32	32	28	253	30	135	138	33	190	172	267	31	212	201	31	163	189	59	164	236	53	231	236	26	36	32	35	35	19	33	35	47	40	193	78
16	49	170	193	255	218	217	219	219	231	172	201	62	251	186	34	33	30	255	32	137	143	34	191	176	267	33	215	203	33	165	190	60	165	238	54	233	237	28	38	32	37	36	21	35	37	48	41	196	80
16.25	45	168	191	254	218	216	219	219	231	172	201	60	250	186	30	30	26	253	29	136	143	32	191	179	264	29	213	201	30	164	189	57	164	237	52	234	236	24	35	30	34	33	18	32	34	46	40	197	76
16.5	49	171	194	256	221	219	223	221	233	172	201	61	253	188	32	32	28	255	31	138	147	33	193	181	268	32	217	205	32	166	191	59	165	239	53	235	239	27	36	32	36	36	19	33	37	47	40	198	79
16.75	48	170	194	256	223	220	224	223	235	175	202	61	253	189	32	32	28	256	31	138	149	33	194	184	267	31	217	206	32	168	192	59	166	240	53	236	240	27	37	31	36	35	19	34	38	47	41	199	78
17	49	171	195	256	224	222	226	224	237	174	202	61	254	190	33	31	28	258	30	139	152	33	196	188	268	32	219	207	32	167	192	60	166	240	53	237	242	27	37	31	36	35	20	33	40	47	39	201	78
17.25	48	172	196	257	227	224	228	227	239	177	205	62	254	191	35	33	29	258	32	140	157	35	197	192	267	33	221	209	33	170	194	60	168	242	55	240	242	27	38	33	36	37	21	35	46	48	42	204	77
17.5	48	171	195	257	227	223	229	227	240	177	205	61	255	193	33	31	26	259	31	140	158	33	197	194	267	32	221	209	31	169	194	59	168	242	53	240	243	26	36	31	35	34	19	34	48	47	40	204	78
17.75	49	173	198	258	229	226	232	229	243	178	206	63	256	195	34	34	31	260	32	142	162	35	199	198	268	33	224	212	33	172	196	62	170	243	55	242	244	27	38	33	37	36	21	35	56	49	43	206	77
18	47	172	198	257	229	227	232	229	243	177	206	61	257	195	32	31	29	260	30	141	162	33	198	199	269	32	224	213	32	171	195	60	168	243	53	242	246	26	36	31	36	35	20	33	60	47	41	206	78
18.25	49	173	198	259	231	228	234	231	245	179	207	63	258	196	34	33	30	262	31	143	166	35	201	202	270	33	225	215	32	173	196	61	170	244	55	243	247	27	37	32	36	35	21	34	67	48	42	208	78
18.5	49	173	198	258	232	229	234	231	246	179	207	62	258	196	33	32	29	262	31	143	168	35	201	206	269	31	224	215	32	172	196	59	169	245	54	246	247	27	36	32	36	35	20	34	71	48	42	210	78
18.75	49	173	200	259	233	230	236	232	248	180	208	62	259	198	34	32	30	263	31	144	172	35	202	207	270	32	227	217	32	174	198	60	171	245	55	246	248	28	38	32	36	36	21	35	80	49	42	211	79
19	48	173	200	260	235	231	237	233	249	180	208	62	259	199	34	32	29	263	32	144	175	35	202	209	269	32	228	218	32	176	198	61	171	246	55	247	249	27	38	32	36	36	20	35	87	48	42	212	78
19.25	49	173	200	259	235	233	238	234	250	179	210	62	261	199	33	32	29	264	30	144	176	34	203	212	270	32	228	219	32	175	199	61	171	247	55	248	251	27	37	32	36	36	19	34	92	49	42	213	78
19.5	49	174	201	261	237	234	240	236	252	181	211	63	260	200	34	33	30	265	31	145	180	36	205	215	270	32	230	221	32	177	200	62	172	248	56	250	251	28	38	33	37	36	21	35	100	50	42	215	78
19.75	48	174	200	260	237	234	239	236	251	180	211	61	261	200	32	31	28	264	31	144	181	35	205	216	270	31	229	220	30	176	199	61	171	248	54	251	250	26	35	31	35	35	19	34	102	49	42	216	78
20	48	174	201	261	238	235	241	236	253	181	212	60	261	201	33	32	29	265	31	145	183	33	205	219	270	32	232	223	31	177	200	61	171	248	54	250	252	26	37	31	35	35	19	33	110	48	41	217	77
20.25	48	175	202	261	240	236	243	236	254	180	212	61	263	202	34	32	29	266	31	145	185	34	206	220	273	32	233	225	32	177	200	60	172	248	54	252	254	27	37	32	36	35	20	34	116	49	41	218	79
20.5	50	176	203	262	241	238	244	238	255	182	213	62	264	204	35	33	31	268	31	146	188	35	207	223	274	34	233	225	33	179	201	61	173	249	54	253	255	28	38	32	37	36	20	34	122	50	42	219	80
20.75	48	175	203	262	241	237	244	238	255	181	214	61	264	203	34	32	29	268	31	145	189	34	207	225	272	33	232	225	32	179	201	60	173	250	54	254	254	27	37	32	36	35	20	34	126	49	42	221	78
21	49	175	203	262	242	239	246	238	256	181	214	61	265	204	34	32	30	268	31	146	191	34	207	226	273	33	234	227	32	179	202	60	173	250	55	255	256	27	36	32	36	35	20	33	134	49	41	222	79
21.25	47	175	203	262	242	239	246	239	256	181	215	61	265	204	33	32	30	268	31	146	193	35	208	228	271	33	234	227	32	181	202	60	173	251	54	255	255	26	36	31	35	35	20	34	140	50	41	223	78
21.5	50	177	205	263	244	241	247	240	257	181	216	62	266	206	35	33	31	269	31	147	196	35	208	230	273	33	236	230	33	181	204	62	174	251	55	257	258	28	38	32	37	37	21	34	146	49	42	225	80
21.75	48	176	204	262	244	240	248	241	258	181	215	62	266	205	34	31	30	269	30	146	197	34	208	231	272	32	236	229	31	182	203	61	174	251	54	256	257	26	37	32	35	35	19	33	152	49	42	225	78
22	48	175	204	262	244	241	248	241	259	182	216	62	265	206	34	31	30	270	31	147	200	35	209	234	273	32	235	229	31	183	203	61	174	252	54	260	256	27	36	32	36	35	20	34	155	49	42	228	78
22.25	47	175	204	262	244	241	248	243	259	183	217	62	265	206	33	31	29	270	31	147	201	34	209	235	271	30	235	229	30	183	204	61	173	253	55	260	256	25	35	31	35	34	20	33	160	49	42	229	77
22.5	47	176	204	263	245	242	249	242	259	181	217	61	266	206	33	32	30	270	31	147	203	34	209	236	273	32	236	230	31	183	203	61	173	253	54	260	257	26	36	31	36	35	20	33	165	49	41	229	78
22.75	49	177	206	264	247	244	251	244	261	183	218	62	268	208	36	33	32	271	32	148	205	35	210	237	273	33	238	233	32	186	206	62	175	253	56	261	259	28	38	32	37	36	21	35	173	50	43	230	78
23	45	175	205	263	246	243	250	242	259	181	217	60	267	206	33	30	29	270	29	147	205	33	209	237	273	30	236	232	30	183	204	60	173	253	53	261	258	25	34	30	34	33	18	32	173	49	41	230	77
23.25	47	175	205	263	246	243	251	244	260	181	217	60	267	208	34	31	29	271	30	147	207	34	209	240	272	31	237	233	30	185	205	60	173	253	54	262	258	26	34	31	34	34	19	32	177	49	41	232	77
23.5	48	177	207	263	248	245	252	245	261	182	218	61	269	209	35	32	31	272	31	149	209	34	210	240	274	33	239	234	32	186	206	61	175	254	56	263	260	27	37	32	36	36	21	34	183	49	42	233	78
23.75	49	177	207	264	248	245	252	245	261	182	219	61	269	210	35	32	31	272	32	149	211	35	211	242	274	33	239	235	31	186	205	61	175	255	54	265	259	27	36	32	36	35	21	35	185	49	43	235	78
Data File	J:\Service\Customer\400\411\ShID_561\data\Assays\10138\crod_SIDx6450xICC169___2_37_138_209_Marx25x2013_A_01B.oka
Set up Time	Mar 25 2013 3:42 PM
Position	1-B
Plate Type	PM02-A
Strain Type	NOT APPLICABLE
Sample Number
Strain Name	Crod
Strain Number	SID_6450_ICC169
Other
Hour	A01	A02	A03	A04	A05	A06	A07	A08	A09	A10	A11	A12	B01	B02	B03	B04	B05	B06	B07	B08	B09	B10	B11	B12	C01	C02	C03	C04	C05	C06	C07	C08	C09	C10	C11	C12	D01	D02	D03	D04	D05	D06	D07	D08	D09	D10	D11	D12	E01
0	36	27	19	23	16	18	12	16	19	15	22	39	23	15	3	5	12	4	2	2	11	13	17	20	22	7	3	2	2	10	3	7	10	13	9	23	18	9	0	0	1	0	3	0	12	7	6	13	43
0.25	26	21	14	17	13	21	16	18	21	24	25	47	17	12	3	8	14	8	4	11	17	22	22	34	17	5	1	3	8	3	3	8	17	19	19	28	14	3	0	0	2	0	0	0	13	13	19	26	34
0.5	29	24	16	19	15	21	17	21	21	27	25	49	21	10	5	9	17	11	7	14	19	25	22	35	19	9	4	4	8	6	5	10	17	23	18	29	17	6	1	0	4	0	2	2	14	15	19	28	41
0.75	27	22	14	18	14	21	16	21	18	28	24	49	19	9	3	7	16	10	6	13	19	25	22	33	19	7	2	2	7	4	4	9	17	23	18	28	16	3	0	0	2	0	1	1	14	13	20	29	33
1	29	22	15	19	14	23	18	22	19	29	26	50	20	9	3	8	17	11	7	14	19	25	22	32	20	8	3	2	9	4	5	10	18	23	19	29	18	4	1	0	4	0	3	2	14	14	20	32	36
1.25	32	23	16	18	15	24	18	20	18	27	26	50	21	10	4	8	17	11	7	12	17	24	21	29	21	9	3	3	9	4	5	9	15	21	17	27	19	5	1	0	4	0	2	1	12	12	18	29	37
1.5	34	24	19	21	18	27	20	24	21	31	29	53	23	13	5	10	19	14	9	17	21	27	24	32	22	10	5	4	11	6	7	12	19	24	20	31	21	5	3	1	6	2	6	5	15	15	22	34	40
1.75	37	28	22	25	21	30	23	27	24	35	33	58	26	17	9	13	24	16	13	19	23	30	28	34	26	13	8	8	14	9	11	14	20	26	24	34	23	9	7	4	9	4	9	8	18	18	25	37	44
2	41	29	29	31	26	35	27	31	27	38	37	62	28	19	10	16	26	18	15	19	23	31	33	34	29	15	12	10	16	12	12	17	23	29	27	35	26	10	8	7	11	7	13	9	19	20	26	38	45
2.25	42	28	32	35	29	42	30	34	32	42	39	62	31	19	10	19	30	20	18	20	23	33	40	33	30	16	14	12	21	17	15	19	25	31	30	36	30	11	11	9	12	7	17	11	18	23	28	40	42
2.5	44	26	35	37	32	48	30	38	33	42	37	62	32	21	10	19	36	20	18	20	21	32	45	34	30	15	14	13	23	17	20	19	24	32	33	39	32	13	12	10	12	11	22	13	18	24	29	43	40
2.75	47	31	38	40	35	56	31	43	33	43	39	62	34	25	14	22	44	22	18	21	23	33	49	36	32	18	17	14	24	19	26	20	25	34	35	45	34	16	15	12	15	16	27	14	19	24	30	46	41
3	45	28	36	39	34	59	30	45	34	43	41	62	33	27	14	23	47	23	19	21	22	34	53	40	29	17	17	16	24	19	32	21	27	34	36	48	32	15	15	12	15	17	29	15	20	26	32	47	34
3.25	46	29	37	40	34	65	33	47	35	45	42	63	33	30	16	24	52	24	21	23	24	35	54	43	30	18	18	18	26	21	38	23	28	36	38	50	33	17	17	14	17	19	31	17	22	27	33	49	35
3.5	45	29	37	40	34	70	32	46	34	44	41	61	33	31	17	23	52	23	19	21	23	35	54	43	30	17	17	16	25	20	42	21	28	35	37	50	32	15	15	12	17	18	30	14	21	27	33	48	32
3.75	44	28	36	39	34	73	32	47	36	45	41	62	31	33	18	23	53	23	20	22	24	35	54	45	29	16	17	15	25	19	48	21	29	35	37	51	32	15	15	11	16	17	30	15	22	27	34	50	31
4	45	28	36	40	33	77	32	46	35	44	41	62	32	36	21	24	53	24	21	23	23	35	55	49	30	17	17	15	25	20	53	22	27	36	37	51	32	15	15	13	16	19	31	16	22	27	34	50	31
4.25	45	28	37	40	34	82	33	46	36	45	41	63	32	39	23	23	54	24	21	23	24	36	55	54	31	17	17	16	26	19	57	22	28	35	37	52	33	15	15	11	16	18	31	15	23	28	33	50	30
4.5	46	29	37	40	35	86	33	46	35	46	40	63	34	40	27	21	53	24	20	22	24	34	53	57	33	17	16	15	25	18	60	20	27	34	36	50	34	15	14	11	14	17	30	14	21	26	32	49	36
4.75	48	31	39	42	37	91	36	48	37	47	43	65	35	46	33	26	57	26	23	24	26	37	58	67	33	19	20	19	28	22	68	25	30	37	40	54	34	18	18	14	19	20	33	17	24	30	36	53	31
5	49	31	39	43	37	94	33	48	37	45	42	63	37	49	33	23	56	25	22	23	24	36	55	68	35	19	19	17	26	20	71	22	27	35	36	52	36	17	16	13	16	19	31	16	22	26	32	50	38
5.25	47	31	39	42	36	96	32	47	35	46	41	62	36	52	34	21	56	24	21	23	24	35	54	70	34	17	17	14	24	18	74	21	26	34	37	51	35	15	15	12	14	17	30	14	21	25	31	50	37
5.5	48	31	40	43	37	101	36	49	39	47	44	67	36	58	40	26	61	27	25	25	26	38	57	79	34	20	20	19	28	22	84	24	31	38	40	55	35	18	19	15	19	21	35	18	24	30	35	54	31
5.75	51	34	42	46	38	104	35	49	39	49	44	65	39	63	45	26	63	27	24	25	26	37	57	81	37	20	20	17	28	22	86	24	30	38	40	54	38	19	19	15	18	20	35	18	24	29	35	53	39
6	50	32	40	43	38	105	35	49	38	47	43	64	38	66	48	24	64	26	23	25	26	37	56	83	36	20	19	17	27	21	88	23	29	37	38	54	36	18	17	14	16	20	34	16	23	28	34	52	37
6.25	50	33	41	45	38	107	35	49	38	47	43	64	38	71	54	24	67	25	22	24	26	36	56	85	37	20	19	17	27	21	92	22	28	36	37	53	37	17	17	14	16	20	33	16	22	27	33	52	38
6.5	48	31	40	43	38	110	35	49	38	47	44	65	36	77	60	26	72	27	23	25	25	37	57	92	34	19	20	18	27	22	98	24	29	37	39	54	34	18	17	14	17	20	35	17	24	29	35	52	30
6.75	50	33	41	44	38	113	37	51	39	49	46	67	37	84	67	27	78	28	25	26	27	39	59	96	35	20	22	20	30	23	102	26	31	38	40	56	36	19	19	15	20	21	37	19	24	31	35	55	32
7	48	31	40	44	38	115	36	50	38	48	44	66	35	90	73	26	83	27	25	26	26	39	57	98	33	20	20	19	29	22	105	25	29	38	40	55	35	18	18	14	19	21	35	18	24	31	36	55	31
7.25	53	35	43	46	40	118	36	50	40	49	44	65	40	99	80	26	89	28	25	26	27	38	57	99	39	21	21	19	29	22	106	25	29	37	39	54	39	20	19	16	19	20	36	19	23	29	34	53	39
7.5	52	34	40	42	37	114	31	43	33	40	38	57	38	104	86	21	93	21	21	18	19	28	51	95	35	19	18	16	25	20	106	16	21	29	33	47	36	16	16	12	13	17	32	12	14	23	26	44	35
7.75	53	35	41	44	39	118	32	45	34	42	40	58	39	112	95	23	101	23	21	19	20	30	54	99	36	20	19	16	26	21	110	17	23	31	35	49	37	17	17	14	14	19	33	14	15	24	27	46	37
8	51	35	43	46	40	124	37	51	40	49	44	64	40	116	101	25	107	28	24	26	27	38	57	106	38	22	21	18	30	23	116	24	30	36	40	55	38	19	19	15	18	21	36	18	23	29	34	54	39
8.25	53	36	44	47	40	125	38	51	40	49	43	65	40	121	106	25	113	27	24	26	27	37	56	109	38	21	21	18	29	22	117	25	29	37	40	54	39	18	18	15	18	21	36	18	23	28	33	54	39
8.5	51	34	44	45	40	129	38	53	41	50	46	68	39	126	115	28	120	29	26	27	28	39	59	116	35	22	22	21	31	24	124	27	31	38	41	58	37	20	21	17	21	23	38	19	25	31	36	56	33
8.75	51	32	40	42	38	125	33	45	35	42	42	61	38	130	121	24	124	23	22	20	20	31	55	114	33	19	20	18	28	22	124	17	24	31	34	51	35	16	16	13	15	19	34	14	17	26	29	47	29
9	55	37	43	45	40	127	33	45	35	40	40	58	41	133	123	22	130	23	21	20	19	29	53	111	39	20	20	16	26	21	124	17	22	30	34	49	38	17	17	14	15	19	34	14	15	24	27	47	38
9.25	54	37	45	48	42	135	39	54	41	50	46	67	41	137	126	27	138	29	27	28	29	39	59	122	39	23	22	20	31	23	129	27	31	39	42	57	40	20	20	16	21	22	39	20	25	30	35	56	41
9.5	57	39	46	47	41	133	35	47	37	44	43	61	43	143	133	25	143	26	24	22	23	32	56	119	39	23	22	19	29	23	131	19	26	33	37	52	40	20	19	16	17	21	37	16	18	27	30	50	39
9.75	53	36	43	45	39	132	33	45	34	40	39	58	41	141	134	22	146	23	22	20	20	28	53	119	37	20	19	16	26	20	131	17	23	30	34	49	38	17	16	13	14	19	35	13	15	24	26	47	36
10	54	38	43	45	39	134	34	45	35	41	40	58	41	144	136	22	151	23	22	20	21	30	54	122	38	20	19	17	26	21	133	17	22	30	35	49	38	17	16	13	15	19	35	14	15	24	27	47	37
10.25	50	33	43	46	39	142	38	52	41	51	47	67	37	146	140	27	156	29	26	28	28	39	60	134	35	21	22	20	30	24	141	27	31	38	41	58	37	19	19	15	21	22	37	19	24	31	36	57	31
10.5	51	33	40	43	37	137	33	46	35	41	41	62	38	149	144	23	159	23	22	19	20	31	55	131	34	19	19	17	28	20	140	18	23	30	35	51	36	16	16	13	15	19	34	14	16	25	28	48	29
10.75	50	33	42	46	41	145	39	53	41	50	46	68	38	150	145	27	165	29	26	27	29	39	60	140	36	20	21	20	31	23	146	28	31	38	41	57	37	18	19	16	21	23	38	19	24	31	36	57	31
11	50	34	43	46	40	147	38	52	41	50	46	66	39	152	147	27	169	29	26	27	28	39	60	141	37	20	22	20	31	23	147	28	31	38	41	58	38	19	19	15	20	22	38	19	24	30	37	57	31
11.25	50	34	44	48	41	149	39	54	42	51	46	68	40	154	150	28	172	31	27	29	29	40	61	146	37	23	23	21	32	23	150	28	32	39	41	59	38	19	19	16	21	23	39	20	26	31	38	58	32
11.5	50	34	43	47	40	149	39	53	41	50	45	67	38	155	151	27	174	29	27	28	29	39	60	147	35	21	22	20	31	23	151	28	31	38	41	58	38	18	19	15	20	22	38	19	25	31	36	58	32
11.75	50	34	43	47	41	150	39	53	41	51	47	67	38	156	154	27	177	29	27	29	29	39	61	150	36	21	22	20	30	22	154	28	31	38	41	58	38	18	19	16	21	22	39	19	24	31	37	57	31
12	56	40	47	50	43	151	40	55	42	51	47	66	44	158	153	28	179	30	28	28	30	40	60	150	42	24	24	20	32	24	154	27	31	38	41	58	42	21	21	17	21	22	41	19	26	30	36	57	42
12.25	54	39	48	51	43	153	41	55	43	52	47	67	44	159	157	28	182	30	28	30	31	41	60	154	42	23	23	21	33	25	157	28	32	39	42	58	43	20	21	17	21	24	42	21	26	31	36	58	41
12.5	54	38	48	51	45	155	41	55	43	52	47	66	44	161	158	28	185	30	27	31	31	40	60	157	41	23	23	20	32	24	159	28	33	38	41	58	43	20	20	17	21	23	42	20	26	31	37	58	41
12.75	48	33	42	46	39	154	38	53	41	50	45	66	38	159	161	26	185	29	26	27	28	38	60	160	35	19	20	19	31	22	162	27	30	37	41	58	37	17	18	14	20	21	37	18	24	30	37	57	30
13	53	37	46	50	43	155	39	54	43	51	46	66	43	162	161	26	188	29	26	29	31	39	60	160	40	22	22	19	31	23	162	27	30	37	41	57	43	19	19	16	20	22	40	19	25	30	36	57	39
13.25	53	38	47	49	43	155	40	54	42	51	46	66	44	162	163	26	189	30	26	28	30	39	60	162	41	23	22	19	30	23	163	27	31	37	41	57	43	20	20	15	20	22	41	19	24	30	36	57	40
13.5	54	40	48	52	44	157	41	56	44	52	47	68	45	165	166	27	191	31	28	30	31	40	60	166	43	24	24	20	31	24	167	29	32	39	42	59	43	21	21	17	20	23	42	21	26	32	37	58	42
13.75	56	39	45	47	41	151	34	47	35	42	41	59	43	166	169	24	191	25	23	21	22	30	55	163	39	21	20	17	29	22	166	19	23	30	35	51	41	17	18	14	16	19	38	15	17	26	29	50	38
14	54	38	44	47	40	151	33	46	35	42	40	59	43	166	171	23	192	24	22	20	21	30	54	164	38	20	19	17	27	20	167	18	21	30	34	50	40	17	16	14	14	18	37	13	16	24	28	49	38
14.25	50	36	44	48	42	159	40	54	42	51	47	67	40	167	175	28	195	30	27	29	30	40	62	175	37	23	22	21	32	23	173	29	32	38	41	59	40	18	19	16	21	23	40	19	25	31	36	59	32
14.5	54	38	45	47	41	152	34	47	35	42	40	57	44	168	174	24	195	24	23	21	22	30	54	169	39	21	20	16	28	21	170	18	23	30	34	51	41	17	15	13	15	19	37	14	16	25	28	48	37
14.75	50	35	44	47	41	160	40	54	42	51	47	67	40	169	178	28	199	30	28	30	30	41	63	180	36	22	23	21	32	24	176	29	32	39	41	59	39	19	19	15	21	23	39	19	25	31	38	58	32
15	56	40	46	50	43	155	35	48	36	43	42	60	45	171	179	25	198	25	24	23	24	31	56	175	41	23	21	18	29	21	174	20	24	31	36	52	41	19	18	15	16	20	40	16	18	27	30	51	39
15.25	55	38	45	47	41	154	34	47	36	41	40	58	44	171	180	23	199	24	22	22	22	29	55	176	39	20	20	17	27	20	175	18	22	29	35	51	41	17	17	14	15	20	37	13	16	25	28	48	37
15.5	56	41	47	49	43	156	36	48	37	43	42	60	46	174	182	25	201	25	24	23	23	31	56	179	41	23	23	18	30	21	176	20	24	32	37	52	43	20	18	15	17	20	40	16	18	26	30	50	39
15.75	54	39	47	50	43	162	39	54	42	51	47	65	45	172	180	27	202	30	27	30	30	39	60	185	42	23	22	20	31	23	178	27	31	38	41	57	44	20	19	15	20	22	41	19	24	30	36	57	41
16	53	38	48	51	43	162	39	54	42	51	46	66	44	173	181	27	203	29	27	29	30	40	61	188	41	23	23	19	32	23	179	28	31	38	41	58	44	20	20	16	20	21	41	20	24	30	37	57	40
16.25	49	33	43	47	41	163	39	54	41	51	46	66	39	172	185	26	205	30	27	30	30	40	61	192	35	19	20	19	31	21	182	29	31	38	40	58	39	18	18	14	20	22	38	18	24	30	37	58	31
16.5	56	39	47	49	41	158	35	48	37	42	41	58	45	176	188	24	205	25	23	22	23	31	56	187	40	23	21	17	28	21	181	19	24	31	36	51	41	18	18	14	16	20	40	15	17	26	30	50	39
16.75	54	40	49	52	45	165	40	55	44	52	47	66	46	176	186	27	208	30	28	30	32	40	61	194	42	23	23	20	31	23	183	28	32	39	41	58	44	20	21	17	21	22	43	20	26	31	37	58	41
17	56	39	47	49	42	159	35	48	37	43	42	59	45	178	190	24	207	25	24	23	23	31	56	191	40	21	21	18	29	21	182	20	24	31	35	53	42	18	17	14	16	20	40	15	17	26	29	50	39
17.25	51	37	46	50	43	166	42	56	43	52	48	69	42	179	192	29	210	32	29	30	32	42	64	201	38	22	23	22	33	25	188	30	33	40	43	61	41	20	21	17	23	23	42	21	26	34	39	60	34
17.5	54	39	49	51	44	166	39	54	42	51	46	65	45	177	188	28	209	30	26	30	31	39	61	198	42	23	22	19	31	23	185	27	31	38	41	58	44	20	20	16	21	22	41	19	26	30	36	57	40
17.75	55	39	46	48	41	160	34	46	36	41	41	58	45	179	192	24	209	24	23	22	23	29	55	196	40	20	20	18	27	19	184	19	23	30	36	51	42	18	17	13	15	19	38	14	16	25	29	49	37
18	52	37	47	51	43	168	41	57	44	52	49	68	43	181	196	30	213	32	29	30	32	42	64	206	38	23	24	21	33	25	191	31	33	40	44	60	41	21	22	17	23	24	42	22	27	33	39	59	34
18.25	50	34	45	48	41	167	39	54	42	51	47	67	41	181	195	28	213	30	28	29	30	40	63	207	37	21	22	20	32	23	190	29	32	39	42	59	39	19	19	16	22	22	41	20	25	31	37	58	32
18.5	52	37	46	50	43	169	41	56	44	53	49	68	42	182	198	29	215	32	29	30	33	42	64	210	39	22	24	21	34	24	192	31	33	40	43	61	41	21	21	17	22	23	42	21	28	33	39	60	35
18.75	55	40	47	49	41	164	34	47	36	43	42	59	46	183	196	25	214	25	23	23	24	31	56	203	41	22	21	18	28	21	188	19	24	31	35	52	42	18	17	14	16	20	40	14	17	26	30	50	38
19	52	37	46	51	43	171	41	56	43	53	49	69	43	184	199	29	217	33	29	30	32	42	65	213	39	23	24	22	33	25	193	31	33	40	44	61	41	21	20	17	23	23	42	22	27	33	40	60	35
19.25	54	36	43	46	40	166	36	50	37	44	45	62	42	185	202	25	216	25	24	22	24	33	59	209	36	21	22	19	30	21	192	21	26	33	37	54	39	18	18	16	18	21	39	16	18	28	32	52	32
19.5	50	35	45	49	42	171	41	55	43	50	48	66	41	184	199	28	218	30	27	30	31	40	63	214	38	22	23	20	32	23	194	30	33	40	42	59	40	19	19	16	22	23	41	19	26	32	38	58	33
19.75	50	35	45	48	42	172	39	54	43	50	47	67	41	184	200	28	218	30	27	29	31	41	63	217	38	21	22	21	32	23	194	30	31	38	42	59	40	19	19	15	20	22	41	20	25	32	38	58	32
20	53	39	49	52	44	173	40	53	43	51	46	65	44	183	194	26	217	30	27	31	31	39	61	213	42	22	22	19	31	21	192	27	30	39	41	57	44	19	18	16	20	21	42	19	25	30	37	56	40
20.25	51	36	46	50	43	175	40	55	43	52	49	68	42	186	201	30	220	32	29	31	33	42	65	220	38	23	24	21	33	24	196	31	34	41	43	60	40	20	20	17	23	24	42	21	27	34	39	59	33
20.5	52	37	46	51	43	176	41	55	43	52	48	68	42	187	203	30	222	32	29	31	33	42	64	221	39	22	24	22	34	24	197	31	33	40	44	61	41	20	21	18	22	23	42	21	26	34	39	60	34
20.75	53	38	47	51	44	175	39	53	42	51	46	65	45	184	196	26	219	30	26	29	31	40	61	218	42	22	21	19	31	21	193	27	31	38	41	58	44	19	18	14	19	21	41	18	24	30	37	57	40
21	54	40	49	53	45	178	41	54	43	52	48	66	45	186	197	27	220	31	28	30	33	40	62	220	42	23	23	20	31	23	194	29	32	39	42	59	44	20	19	15	21	22	43	20	26	31	38	57	41
21.25	54	39	48	51	44	178	39	53	41	51	46	65	46	187	198	27	220	30	27	29	32	39	60	221	42	23	21	19	30	21	195	28	31	38	42	57	45	20	18	15	19	21	42	19	24	30	37	57	40
21.5	48	34	44	49	41	179	40	54	42	51	48	67	40	188	203	27	223	31	27	30	33	41	63	225	36	20	23	19	31	22	198	29	32	39	42	60	39	18	18	14	21	22	40	19	26	32	39	59	32
21.75	53	39	48	52	44	181	40	53	42	51	47	65	45	187	198	26	222	30	27	29	33	40	62	222	42	22	22	19	30	22	195	29	31	38	41	58	44	19	18	15	20	21	42	19	24	31	38	56	40
22	55	41	49	53	45	182	40	54	42	52	47	66	47	189	201	28	224	32	28	30	33	41	63	224	43	24	24	20	32	24	196	29	32	40	43	59	46	21	20	17	22	22	43	20	26	31	38	58	41
22.25	53	39	48	52	44	183	40	53	42	51	46	65	45	188	199	27	223	30	27	29	33	40	61	225	42	23	22	19	31	22	196	28	30	38	42	58	44	20	19	16	19	21	42	18	25	30	38	58	40
22.5	52	36	46	50	42	185	41	54	43	51	48	68	42	192	208	29	226	31	28	30	34	42	64	230	37	22	23	21	33	24	200	31	33	40	44	60	40	20	20	17	22	23	41	20	26	33	39	59	34
22.75	54	38	48	51	44	185	39	53	42	51	46	65	45	189	200	27	224	30	27	29	33	39	62	227	41	23	21	19	30	21	197	29	31	38	41	58	43	20	18	14	20	21	42	18	25	30	38	56	39
23	56	40	49	53	45	187	40	53	43	51	47	66	47	191	203	28	226	31	28	31	33	41	62	227	42	24	24	20	31	23	198	28	32	39	43	59	45	21	20	17	22	23	43	20	26	31	39	58	41
23.25	52	38	47	51	44	188	39	54	42	51	47	65	43	190	201	27	225	31	27	30	33	41	62	229	40	21	22	18	30	21	198	28	31	38	43	58	42	19	17	14	19	21	42	19	25	31	39	57	39
23.5	55	40	49	54	45	190	41	53	43	52	47	66	46	192	204	27	227	31	28	30	33	41	64	231	42	24	24	20	32	23	199	29	32	40	43	59	45	21	19	16	21	22	43	20	27	32	39	57	42
23.75	54	39	48	52	44	190	41	53	43	52	47	66	45	192	203	27	227	31	28	30	34	41	63	231	41	22	23	19	31	22	199	28	31	39	41	59	43	20	18	15	20	22	43	20	26	31	39	58	40
Data File	J:\Service\Customer\400\411\ShID_561\data\Assays\10144\crod_SIDx6450xICC169___2_37_144_209_Marx27x2013_A_01B.oka
Set up Time	Mar 27 2013 5:31 PM
Position	1-B
Plate Type	PM02-A
Strain Type	NOT APPLICABLE
Sample Number
Strain Name	Crod
Strain Number	SID_6450_ICC169
Other
Hour	A01	A02	A03	A04	A05	A06	A07	A08	A09	A10	A11	A12	B01	B02	B03	B04	B05	B06	B07	B08	B09	B10	B11	B12	C01	C02	C03	C04	C05	C06	C07	C08	C09	C10	C11	C12	D01	D02	D03	D04	D05	D06	D07	D08	D09	D10	D11	D12	E01
0	41	37	19	18	15	16	15	11	15	19	26	43	28	18	6	13	13	6	4	5	15	16	21	30	22	12	2	2	5	3	2	3	10	13	14	21	20	7	0	0	1	0	0	0	7	11	12	19	48
0.25	29	24	16	18	16	20	18	23	16	27	34	48	17	10	4	7	12	8	7	13	20	25	24	35	20	7	1	2	6	2	5	11	18	24	22	30	20	5	0	0	7	0	2	1	17	15	24	32	33
0.5	27	23	15	15	15	21	17	20	17	27	25	49	20	8	3	7	13	9	7	14	20	25	23	32	19	7	2	2	6	2	5	10	14	21	18	28	15	4	0	0	2	0	3	1	12	14	22	35	28
0.75	30	23	14	17	16	22	17	20	19	29	26	50	20	9	5	8	15	11	8	13	21	25	22	31	19	9	3	3	8	3	5	11	15	22	19	29	17	5	1	0	3	1	4	2	13	15	22	35	31
1	29	23	14	18	17	22	18	21	20	28	28	50	20	8	4	8	15	11	9	15	21	27	26	36	18	8	3	2	8	3	6	11	15	23	20	31	16	4	1	0	4	1	6	3	15	18	24	37	24
1.25	31	23	16	19	18	25	19	23	21	32	28	53	22	10	5	8	16	12	10	16	22	28	25	34	21	9	3	4	9	5	6	13	17	25	21	30	19	5	2	0	4	2	8	4	16	18	25	38	31
1.5	33	25	18	22	19	26	20	24	23	34	30	54	24	13	6	10	17	14	12	18	22	29	26	34	23	10	5	5	11	6	8	14	18	26	22	32	20	6	4	2	6	3	9	6	16	18	25	39	35
1.75	37	28	22	26	22	30	23	28	26	37	33	61	27	16	10	14	21	16	14	20	24	31	29	36	25	14	7	8	14	9	11	17	21	28	25	34	24	9	6	5	9	6	13	9	18	21	27	41	38
2	39	26	25	31	25	36	28	32	29	40	38	63	28	15	8	15	25	19	16	20	24	35	35	41	26	14	9	13	16	15	12	21	22	31	30	35	26	8	9	7	11	7	17	11	18	24	30	42	30
2.25	44	27	32	37	31	46	32	38	34	45	39	64	32	20	11	20	32	24	20	21	24	36	41	37	31	17	15	17	21	20	16	26	26	35	33	36	32	12	13	14	15	10	24	15	19	26	31	43	37
2.5	45	28	33	40	32	52	35	44	35	46	40	65	32	23	13	21	38	26	21	23	24	37	47	39	31	18	17	17	24	23	23	27	27	36	37	39	33	13	15	14	15	16	31	18	21	26	31	46	36
2.75	47	30	36	43	34	60	36	48	37	46	41	66	34	28	16	22	45	27	23	24	26	38	52	40	32	20	18	20	25	24	29	29	28	37	40	45	35	16	17	15	18	21	36	19	23	29	33	48	37
3	47	29	35	43	34	65	36	49	37	47	41	65	34	29	17	23	48	28	24	23	25	38	53	41	33	20	19	19	26	24	33	28	27	37	40	48	34	15	17	15	17	22	38	19	22	28	32	47	37
3.25	45	28	34	43	34	70	36	50	37	47	41	66	34	31	17	22	49	27	22	24	26	38	54	42	33	19	17	19	24	23	38	29	28	36	39	48	34	15	16	14	16	21	38	19	22	28	33	49	36
3.5	46	29	35	43	33	74	35	50	37	48	41	66	35	33	19	22	51	28	22	24	25	37	55	46	33	19	17	20	25	24	42	28	28	36	39	48	35	15	16	15	17	21	39	19	23	28	32	49	37
3.75	48	30	36	44	34	78	36	51	37	48	42	65	35	36	22	23	52	27	23	25	26	37	55	53	34	21	19	20	26	24	48	28	29	37	40	48	35	16	16	15	17	22	40	19	23	28	32	49	38
4	48	30	36	45	34	82	37	50	38	48	42	66	35	38	25	22	52	28	24	25	26	38	55	59	34	20	20	21	25	25	53	30	29	36	39	49	36	16	18	15	17	22	40	19	23	28	32	50	37
4.25	49	30	37	45	35	86	37	50	38	48	43	66	36	41	27	23	53	28	24	25	26	38	56	65	33	20	19	21	26	25	58	30	29	37	40	50	36	16	17	16	17	23	40	20	22	29	33	51	36
4.5	49	30	37	45	34	91	38	51	39	49	43	66	37	44	30	23	53	29	24	25	26	39	56	70	34	21	19	21	27	25	63	30	29	38	40	51	36	17	18	16	17	23	42	20	23	29	34	51	37
4.75	52	32	38	47	36	95	39	52	39	51	44	69	39	50	34	25	55	29	26	26	27	41	57	77	35	22	21	23	28	27	70	31	31	39	42	52	38	18	19	18	19	25	43	21	25	30	35	53	38
5	50	31	36	46	35	97	38	51	39	49	42	68	37	51	35	24	55	30	25	24	27	39	56	80	35	21	20	21	27	25	74	30	29	38	41	51	37	17	18	17	18	24	42	20	22	30	34	52	37
5.25	51	31	37	46	35	100	37	50	39	49	42	66	38	54	38	23	56	28	24	23	25	38	55	82	35	21	20	22	25	25	78	29	28	37	40	51	37	17	17	16	18	22	41	20	22	29	33	50	37
5.5	53	32	37	45	37	101	34	47	34	43	39	62	38	59	41	22	58	26	23	19	20	32	53	84	35	22	20	20	25	25	82	25	24	33	37	47	37	16	17	16	15	22	38	18	17	27	28	44	37
5.75	52	33	39	49	38	109	41	54	40	52	45	69	40	64	46	26	63	31	26	27	28	42	58	93	37	23	22	23	29	28	88	33	31	40	43	53	40	19	20	18	20	26	45	23	26	32	35	54	39
6	51	32	36	45	35	106	33	46	34	42	39	60	38	66	49	21	64	25	21	18	20	31	52	89	34	20	18	19	25	24	89	25	23	31	35	46	36	15	16	14	13	22	37	16	16	25	26	43	35
6.25	52	33	37	46	36	109	34	46	35	42	39	61	39	72	55	21	69	27	22	18	20	32	52	93	35	21	19	20	25	24	94	25	23	31	36	47	37	16	17	16	15	23	38	17	16	26	27	44	35
6.5	50	31	37	48	36	115	40	53	41	50	44	67	37	78	61	26	75	31	27	27	28	41	58	103	34	23	22	24	29	27	101	32	30	39	42	54	36	17	19	18	21	26	44	22	26	31	35	54	29
6.75	51	29	35	45	35	114	35	46	35	42	40	62	37	85	66	21	78	26	22	18	19	33	54	102	32	20	18	21	24	25	101	25	23	32	38	48	35	15	16	15	15	22	38	17	16	27	28	44	27
7	53	35	40	50	40	122	42	55	43	53	46	69	41	94	75	26	88	32	28	27	29	42	59	109	38	24	23	25	30	28	107	34	32	41	43	55	40	19	21	19	22	26	48	24	26	32	36	56	39
7.25	51	33	37	46	37	120	35	46	34	43	40	61	39	100	80	21	91	27	23	19	20	32	52	104	35	20	19	21	26	25	107	26	23	31	36	48	38	16	17	15	15	23	39	17	16	26	27	45	35
7.5	53	33	39	49	38	126	40	54	40	52	44	69	40	107	87	25	98	31	27	26	27	40	57	112	36	23	22	23	29	26	111	32	31	38	41	53	39	19	20	18	20	25	46	21	24	30	34	54	38
7.75	56	35	40	48	39	126	37	49	36	45	42	63	41	115	96	23	105	28	25	20	22	33	54	112	36	22	22	22	28	27	115	27	25	33	38	49	39	18	19	18	17	24	42	19	19	27	29	47	37
8	53	33	37	48	37	128	35	47	35	44	39	61	40	118	101	22	110	26	24	19	20	32	53	113	36	21	20	21	26	25	116	25	24	32	36	48	38	16	17	16	15	23	38	17	16	27	28	45	35
8.25	56	36	40	49	38	131	37	49	36	45	41	62	42	125	108	24	117	28	24	21	22	34	54	117	38	24	22	22	28	27	120	27	25	34	38	49	40	18	19	17	17	24	40	19	18	28	28	47	37
8.5	54	34	41	51	39	134	41	54	41	52	44	67	41	129	112	26	124	31	27	26	27	40	57	123	39	24	23	23	31	28	124	32	30	39	41	53	41	20	20	20	20	26	42	21	23	30	35	53	37
8.75	53	35	41	51	40	137	42	55	42	54	46	68	43	132	116	26	130	32	27	27	29	42	58	126	40	24	23	24	31	27	126	33	30	39	43	54	41	19	20	19	21	26	42	22	25	31	35	55	39
9	58	39	42	51	40	137	38	50	38	47	43	65	44	139	124	26	137	30	26	22	23	36	56	126	39	26	24	24	30	28	130	29	27	34	39	51	41	20	21	20	19	26	42	21	18	29	30	48	39
9.25	54	36	42	53	42	142	43	57	43	55	47	70	43	141	123	27	143	34	29	28	31	43	60	133	39	24	24	25	31	29	134	34	32	41	43	56	42	20	21	20	23	27	45	24	27	33	37	57	40
9.5	51	33	39	50	40	143	42	55	42	53	46	69	40	143	129	27	146	34	27	27	29	42	59	136	36	23	23	26	31	29	136	34	31	41	43	56	39	19	22	18	22	27	45	23	25	33	37	56	31
9.75	55	37	42	53	42	146	44	57	44	55	47	70	45	146	130	27	152	34	30	29	31	44	60	138	41	25	25	25	32	29	138	35	33	40	43	57	43	20	22	20	23	27	45	24	26	32	36	57	40
10	55	36	42	54	42	148	43	57	43	56	47	69	45	149	132	27	156	34	29	28	30	43	60	140	41	25	25	25	32	29	140	34	33	41	44	56	43	20	22	21	22	27	45	24	26	32	36	57	40
10.25	58	39	43	52	42	149	39	51	38	48	44	64	45	152	139	27	162	30	27	23	24	36	56	139	41	26	25	25	31	29	141	28	27	35	40	52	43	21	21	20	20	26	43	20	20	29	31	48	40
10.5	55	35	39	49	40	148	36	49	35	46	41	61	42	152	137	23	163	28	24	20	22	32	53	139	38	22	20	22	28	26	142	27	24	32	37	49	40	17	17	17	16	24	39	19	16	27	28	46	36
10.75	49	31	38	50	39	151	42	55	41	54	46	69	39	153	140	26	167	33	27	27	29	42	59	149	34	22	22	25	31	27	148	33	31	39	42	55	38	17	21	17	21	27	45	22	25	32	37	56	28
11	57	37	42	51	41	152	37	50	36	47	42	63	43	155	143	24	170	28	24	21	22	34	54	145	40	24	22	23	29	27	147	28	25	33	37	49	42	18	19	18	17	24	41	19	18	28	29	47	38
11.25	52	34	40	51	40	155	43	57	44	54	46	70	40	157	145	27	175	34	28	29	29	43	60	154	37	24	23	26	32	29	152	35	31	40	44	55	39	19	21	19	22	26	45	24	26	34	37	57	31
11.5	50	32	38	51	39	156	42	55	41	53	46	68	39	157	146	26	177	33	28	27	29	42	59	156	35	22	21	24	30	27	154	33	31	39	42	55	39	17	19	18	21	26	43	21	24	32	37	56	30
11.75	54	33	38	49	39	155	37	51	37	48	42	65	41	160	151	25	179	29	25	20	22	35	56	154	36	23	22	24	29	27	155	28	25	33	38	51	38	17	18	17	18	25	41	19	18	29	30	48	29
12	50	32	38	51	39	158	43	56	42	54	45	69	39	160	150	26	181	34	28	28	30	42	59	160	36	22	22	24	31	28	158	34	31	39	43	55	39	18	19	18	22	26	45	22	25	32	37	56	29
12.25	55	36	42	54	43	160	44	57	43	56	46	69	43	162	151	26	183	34	28	29	30	43	59	161	41	24	23	25	32	28	160	34	32	39	43	56	43	20	21	20	22	27	45	23	25	32	36	56	38
12.5	56	35	40	50	41	158	37	51	36	47	41	62	44	163	155	23	184	28	24	20	22	33	54	158	38	22	21	21	28	26	160	27	24	31	38	50	41	18	18	17	16	24	41	18	17	27	28	47	37
12.75	55	36	43	54	43	162	44	57	43	56	48	69	44	163	155	27	187	33	29	28	31	43	61	166	40	25	24	25	32	28	163	35	32	40	44	56	44	20	20	20	22	27	46	23	26	33	36	56	39
13	57	37	42	51	41	161	37	50	36	48	42	62	44	166	160	23	188	29	26	21	22	34	55	163	39	23	21	22	29	27	164	27	25	33	38	50	42	18	18	17	17	25	42	18	17	27	29	47	37
13.25	55	36	41	55	43	164	44	57	43	57	48	70	44	167	159	27	190	33	29	29	31	43	60	170	41	24	24	26	32	28	166	34	32	41	44	57	44	19	21	20	22	27	45	23	26	31	37	57	39
13.5	53	33	40	52	42	163	44	57	44	55	47	71	41	168	164	27	193	35	30	28	30	43	61	174	37	24	24	26	33	29	171	34	33	40	44	57	41	19	21	20	23	27	47	24	25	33	38	58	33
13.75	53	35	41	54	43	165	45	58	45	57	49	71	43	171	166	29	195	36	30	30	32	45	63	178	38	25	25	28	35	31	173	36	34	42	45	58	42	22	21	21	24	29	49	25	28	36	39	59	33
14	57	39	44	55	44	167	45	59	45	57	48	70	46	171	165	29	196	35	31	30	32	44	62	177	41	27	25	26	33	29	172	35	34	41	45	58	45	21	22	21	24	27	47	25	27	33	38	58	41
14.25	56	38	43	54	44	167	44	57	43	57	47	69	45	171	166	27	195	33	30	30	31	42	60	178	41	25	25	25	33	28	172	34	32	40	42	57	45	19	21	19	21	26	46	23	25	32	37	57	41
14.5	55	35	39	50	39	164	38	50	37	49	42	64	42	173	174	24	197	29	26	21	22	36	57	178	36	23	22	23	29	27	174	28	24	33	38	51	39	18	19	17	18	24	42	19	18	29	30	49	29
14.75	54	37	42	55	43	168	45	58	45	57	49	72	43	175	174	29	201	36	31	30	32	45	63	186	38	25	26	29	34	31	179	36	34	42	45	59	42	20	22	21	24	28	48	25	28	35	39	58	33
15	53	34	41	53	42	168	44	58	44	55	47	70	41	175	175	28	202	34	30	29	31	43	62	187	38	24	23	26	33	29	178	34	32	41	44	57	41	20	21	19	23	28	47	24	26	34	39	57	32
15.25	53	34	41	53	42	169	43	59	44	56	48	70	41	176	177	28	203	35	29	29	31	44	62	189	37	24	24	27	34	29	181	35	32	41	44	58	41	19	21	20	23	28	47	24	26	34	38	57	32
15.5	58	39	44	53	43	168	39	51	38	50	43	64	45	178	178	25	203	30	27	23	24	35	56	185	41	25	23	24	30	28	179	28	27	34	38	52	44	20	19	18	19	25	43	20	19	29	30	49	39
15.75	52	34	41	53	42	170	44	58	44	56	48	71	42	177	180	28	205	34	30	29	31	44	63	193	37	24	24	26	34	29	183	36	33	41	44	58	40	20	21	20	24	28	47	23	27	35	38	57	32
16	61	41	46	55	45	172	40	53	39	51	44	65	48	180	183	27	206	31	28	23	26	36	58	190	43	26	24	26	32	29	182	29	27	35	40	53	44	21	21	21	21	27	45	22	20	30	31	49	41
16.25	53	35	41	53	42	172	42	57	42	57	46	68	43	177	177	25	204	33	28	28	30	41	61	194	40	23	22	23	30	26	180	32	31	39	43	57	43	18	18	18	20	25	44	22	25	31	36	56	37
16.5	56	38	44	55	44	173	44	58	44	58	48	69	47	178	179	28	206	34	29	30	32	42	61	196	42	25	25	25	32	28	182	34	33	40	44	57	45	20	21	20	22	27	46	23	26	31	37	56	40
16.75	56	38	44	55	44	174	43	58	44	58	47	69	45	180	181	27	206	34	29	29	32	43	61	198	41	25	24	25	33	28	184	34	32	40	43	57	45	20	21	19	22	26	46	24	26	32	36	56	39
17	56	38	43	54	43	175	44	57	45	58	48	69	45	180	182	26	207	34	29	29	31	42	62	199	41	25	24	25	32	28	184	34	32	40	44	57	44	20	20	18	22	26	45	23	26	32	37	56	39
17.25	57	40	45	57	45	177	45	59	45	60	49	71	46	182	184	28	209	35	31	31	33	44	63	202	43	26	25	26	34	29	186	35	34	42	45	58	46	22	22	21	23	28	48	25	27	34	38	58	41
17.5	58	39	43	53	43	176	38	51	38	50	42	63	46	183	187	25	210	29	26	22	24	34	56	199	41	24	23	23	30	28	186	28	25	32	38	50	44	19	19	18	18	24	43	18	17	28	30	47	38
17.75	57	40	45	56	45	179	45	58	44	58	48	70	47	185	187	29	211	34	31	30	32	44	62	205	43	27	25	27	34	29	188	35	34	42	45	58	46	22	23	21	24	27	48	24	27	34	38	57	42
18	55	38	44	55	43	179	44	57	43	58	47	69	45	184	186	27	211	33	30	29	31	43	62	206	41	24	24	25	32	28	187	34	33	41	43	57	44	20	21	20	22	26	46	23	26	32	37	56	40
18.25	57	40	44	56	45	181	45	58	44	60	49	71	47	185	187	28	212	34	30	30	33	44	62	208	42	26	25	26	34	29	189	34	34	41	45	60	46	22	22	20	23	27	47	25	27	33	38	57	42
18.5	56	38	44	54	44	181	44	58	44	58	48	69	45	185	187	27	211	33	29	29	32	44	62	210	41	24	24	25	32	28	189	34	33	41	43	58	44	21	20	19	22	26	46	23	26	33	38	57	40
18.75	57	39	45	55	46	183	44	58	45	59	48	70	47	186	189	28	214	35	30	31	32	43	63	212	42	26	25	26	33	29	191	34	33	41	44	58	46	21	22	21	23	27	46	24	26	33	38	57	41
19	57	40	45	56	46	184	45	58	45	59	49	70	47	187	189	29	214	35	31	31	32	43	62	214	43	26	24	26	33	29	191	34	33	41	44	58	46	22	22	20	23	27	47	24	27	33	38	57	41
19.25	56	38	44	55	45	185	44	57	44	58	47	69	46	187	190	27	215	33	30	29	32	43	61	214	41	26	25	25	32	28	191	34	33	41	43	57	44	21	21	19	22	26	45	23	26	33	37	56	40
19.5	57	39	45	56	46	187	44	58	45	60	49	70	48	189	191	28	216	35	30	30	32	44	63	216	43	26	25	26	33	30	193	35	33	41	45	59	46	22	22	20	24	27	46	24	26	33	39	57	41
19.75	55	37	43	53	44	188	45	58	44	59	48	70	45	187	190	26	215	34	29	30	32	43	62	217	41	23	23	24	30	27	192	34	33	40	44	58	45	19	20	19	22	25	46	23	26	32	38	57	39
20	56	39	45	55	44	189	44	57	45	59	48	70	46	190	192	27	215	34	30	31	32	43	62	219	42	25	24	25	32	29	193	34	32	41	44	57	45	21	21	20	22	26	46	23	26	32	38	57	40
20.25	53	35	42	54	43	190	44	59	44	58	48	71	42	190	196	28	220	35	30	30	32	44	63	222	37	24	24	27	33	30	196	36	32	42	45	58	40	20	21	19	23	27	47	24	27	34	38	58	32
20.5	58	40	45	55	46	192	45	58	44	60	48	69	47	191	194	28	218	35	30	31	33	43	63	221	43	26	24	26	32	29	195	35	33	41	45	58	46	22	22	21	24	26	46	23	26	33	39	57	41
20.75	55	40	44	55	45	193	45	57	44	59	48	69	46	190	191	27	217	34	30	31	32	43	62	223	42	24	23	25	31	28	195	33	33	40	44	58	45	21	20	20	22	26	45	23	26	32	38	56	40
21	57	39	45	54	45	195	44	57	44	58	48	69	47	192	194	27	219	34	29	30	33	43	63	223	42	25	23	25	32	29	196	34	33	40	44	58	46	21	22	20	23	26	45	23	26	32	37	57	40
21.25	55	39	44	55	45	196	44	57	44	59	48	71	46	192	195	27	219	34	29	30	33	43	63	225	41	25	23	24	32	28	197	34	33	41	43	58	45	21	21	19	22	26	45	23	26	33	38	57	40
21.5	57	41	46	56	45	197	45	57	45	60	49	69	48	193	196	29	219	34	30	31	33	45	63	225	44	27	25	25	32	29	197	35	33	41	44	58	46	23	22	20	23	26	46	24	26	33	38	57	41
21.75	57	39	44	55	45	197	44	56	43	59	47	69	47	193	195	27	219	32	29	30	31	43	62	226	42	26	23	25	32	28	197	33	32	40	43	57	45	21	20	19	21	25	44	22	25	32	37	56	40
22	55	38	44	54	44	199	44	57	45	59	48	70	46	193	195	26	220	34	30	31	33	44	62	228	41	24	23	24	31	28	198	34	33	41	44	58	44	21	19	19	22	26	44	23	27	32	38	57	39
22.25	55	38	44	54	44	200	44	57	44	59	47	69	45	192	195	26	219	33	28	30	33	43	63	228	41	24	22	24	30	28	198	34	32	41	44	57	44	20	20	19	21	26	43	22	25	32	38	56	39
22.5	56	38	43	54	45	201	44	56	43	59	48	69	46	193	195	26	219	32	29	30	32	42	62	229	41	24	23	24	31	27	198	33	33	40	43	58	45	20	19	19	21	25	44	22	26	32	38	56	40
22.75	54	37	43	55	44	204	45	59	45	60	49	71	44	196	202	29	226	36	31	32	33	45	65	234	39	26	25	27	34	30	202	37	35	42	45	59	42	21	22	21	25	28	48	24	27	35	40	58	34
23	51	34	40	52	41	203	43	57	43	57	47	70	40	195	200	26	225	33	29	29	32	43	63	234	36	21	21	25	30	28	201	34	32	40	43	57	39	18	19	18	21	26	45	22	25	32	38	56	30
23.25	54	38	43	54	44	204	43	55	43	59	46	68	46	195	196	26	220	33	28	30	32	42	61	231	42	25	22	24	30	27	199	33	31	38	43	56	45	19	19	18	20	24	42	21	24	31	36	54	39
23.5	57	40	45	55	46	207	44	56	45	59	48	69	46	196	198	28	222	34	29	31	33	43	63	234	42	25	23	25	32	29	201	35	33	41	44	58	44	21	20	20	23	25	45	22	26	32	37	56	40
23.75	56	40	45	55	45	207	45	56	44	60	48	69	46	196	197	28	221	34	29	32	33	44	62	235	42	25	23	25	32	29	201	34	33	41	44	58	45	20	21	19	22	25	44	23	25	33	38	57	41
Data File	J:\Service\Customer\400\411\ShID_561\data\Assays\10138\crod_SIDx6450xICC169___3_37_138_209_Marx25x2013_A_02A.oka
Set up Time	Mar 25 2013 3:42 PM
Position	2-A
Plate Type	PM03-B
Strain Type	NOT APPLICABLE
Sample Number
Strain Name	Crod
Strain Number	SID_6450_ICC169
Other
Hour	A01	A02	A03	A04	A05	A06	A07	A08	A09	A10	A11	A12	B01	B02	B03	B04	B05	B06	B07	B08	B09	B10	B11	B12	C01	C02	C03	C04	C05	C06	C07	C08	C09	C10	C11	C12	D01	D02	D03	D04	D05	D06	D07	D08	D09	D10	D11	D12	E01
0	18	7	5	0	0	0	4	3	8	5	22	25	14	1	3	0	0	0	3	2	3	5	12	23	78	0	2	0	0	0	0	3	4	3	11	23	11	1	2	0	0	2	0	5	5	4	11	21	15
0.25	22	9	10	4	6	6	15	11	18	17	36	39	20	3	7	4	2	5	11	12	9	14	20	37	75	4	4	4	0	5	0	10	10	15	21	35	18	6	6	6	0	12	3	13	13	15	21	36	21
0.5	18	6	7	1	0	2	5	6	10	9	25	28	18	3	5	0	0	1	7	6	6	9	16	30	73	3	2	2	0	3	0	6	8	10	17	31	15	5	4	2	0	9	1	10	11	10	19	32	17
0.75	18	6	5	2	0	1	6	6	11	9	25	29	17	3	5	1	0	1	7	7	5	10	14	31	70	3	2	2	0	2	0	6	7	11	17	31	18	6	3	4	0	9	2	10	11	12	19	33	23
1	19	5	6	2	0	3	7	6	12	9	27	30	18	2	5	0	0	2	7	8	6	11	15	32	68	3	2	3	0	3	0	7	8	11	17	32	20	7	4	4	1	11	2	11	12	16	21	34	24
1.25	20	6	7	2	1	3	7	7	12	10	27	30	19	3	6	1	0	3	8	8	7	10	16	34	67	4	3	3	0	4	0	8	9	12	19	34	20	7	5	5	1	11	3	13	13	14	22	36	25
1.5	21	6	7	3	0	3	8	5	12	10	27	30	19	2	5	1	0	2	8	8	6	10	16	32	63	4	2	2	0	3	0	7	8	12	18	34	21	8	5	3	1	11	2	11	12	14	21	34	26
1.75	23	9	10	5	3	6	11	9	15	13	29	34	23	6	9	3	2	6	10	10	9	14	18	36	64	7	5	5	0	6	2	10	12	15	21	37	25	11	9	7	5	15	5	14	16	16	25	38	28
2	21	9	9	5	4	5	10	8	16	13	29	35	22	5	8	5	3	5	11	10	9	15	19	37	60	7	6	5	0	6	2	9	12	15	21	38	23	10	7	6	2	15	5	15	16	17	24	39	27
2.25	21	8	8	4	2	4	10	8	15	14	29	35	21	5	6	3	1	4	9	9	8	14	18	36	55	5	4	5	0	4	1	9	10	14	19	37	24	10	5	6	1	13	3	14	14	15	22	38	29
2.5	22	7	8	3	1	4	10	8	14	13	29	34	21	4	8	3	1	4	10	9	9	14	19	37	51	6	4	4	0	4	1	9	10	13	20	37	22	9	6	4	2	12	4	13	15	15	24	38	25
2.75	24	8	10	5	3	7	12	9	16	16	31	36	23	7	9	4	2	6	11	10	11	17	20	36	49	7	6	6	0	6	3	10	12	15	21	37	24	12	8	5	4	14	6	15	16	17	25	40	27
3	27	10	11	6	4	8	14	9	19	17	32	36	26	11	9	6	4	6	12	10	13	20	20	35	48	9	8	7	0	6	4	11	12	15	21	37	29	14	10	7	5	14	5	15	15	17	27	40	33
3.25	25	11	10	5	5	8	19	11	22	21	36	38	26	14	11	6	4	9	14	12	16	24	21	39	44	9	12	8	1	8	4	13	14	16	22	40	26	13	10	7	5	16	7	16	18	19	30	44	29
3.5	27	13	12	7	6	8	22	10	25	26	41	38	28	18	10	7	5	8	13	11	18	28	21	38	43	11	15	8	1	7	5	12	13	16	22	39	29	15	10	8	6	16	7	16	17	18	31	46	33
3.75	26	11	12	7	5	8	25	11	29	27	47	40	28	21	10	6	4	8	13	11	22	33	23	38	38	8	18	8	0	6	4	12	13	16	22	41	27	14	9	7	5	15	7	16	18	18	33	48	31
4	29	13	12	9	7	9	30	12	32	28	61	41	32	25	11	8	5	9	14	12	27	37	24	38	36	10	23	9	2	7	5	13	14	17	22	43	30	16	11	9	7	16	8	17	18	19	37	51	34
4.25	28	13	11	9	6	9	34	12	33	30	81	42	33	28	13	8	6	9	13	13	31	40	26	38	32	10	26	8	1	7	5	14	14	17	23	43	29	15	10	7	7	17	8	17	17	18	40	54	32
4.5	28	15	12	8	6	8	37	13	34	31	118	43	34	31	14	8	5	9	14	13	33	41	29	39	30	9	28	8	0	7	4	14	14	17	23	44	29	14	9	7	5	16	8	16	17	19	41	58	33
4.75	31	20	14	10	9	11	43	17	38	35	172	46	39	36	17	10	8	11	16	15	37	46	31	41	30	13	34	11	4	10	7	17	16	21	25	48	32	17	12	10	7	19	10	18	20	20	46	61	37
5	30	22	13	10	8	10	45	18	40	37	227	47	39	39	18	9	7	10	15	14	39	48	31	40	28	11	34	9	2	8	6	16	16	21	24	50	30	16	11	8	7	18	8	17	19	20	48	64	34
5.25	29	23	12	9	7	9	45	20	43	38	270	48	41	40	19	9	6	10	14	15	41	50	30	41	26	11	34	8	1	7	6	16	15	21	24	53	31	15	9	8	6	17	7	17	17	19	50	66	35
5.5	33	27	15	11	10	11	49	23	46	42	288	50	47	45	22	11	9	13	16	15	45	53	31	41	29	12	39	12	4	9	7	18	18	25	25	57	35	18	13	9	8	19	9	18	19	20	54	71	39
5.75	32	30	16	11	11	12	52	26	50	45	295	55	48	46	26	11	11	14	17	17	48	57	34	43	28	12	42	12	4	10	8	19	17	27	27	63	32	18	13	10	8	19	10	19	21	22	57	73	36
6	32	32	15	11	10	12	53	28	51	46	293	55	49	48	28	11	10	13	17	16	49	58	35	42	27	12	42	12	4	9	7	18	17	29	26	65	33	17	12	9	7	19	9	19	20	21	59	76	36
6.25	32	33	15	12	11	12	54	30	53	49	295	57	50	50	31	12	12	15	20	17	52	61	38	42	27	11	43	12	4	9	7	20	17	30	26	70	31	17	12	8	8	19	10	19	20	21	61	79	35
6.5	32	36	16	11	11	12	55	33	54	53	294	59	53	51	34	13	14	17	20	18	54	62	40	43	28	12	45	13	4	9	8	22	17	31	27	74	33	17	11	9	8	19	10	19	20	21	63	81	37
6.75	34	38	17	13	14	14	57	36	59	57	296	63	55	54	39	15	17	18	22	20	58	65	45	44	29	14	47	16	5	10	10	26	19	34	28	81	34	18	13	10	9	20	11	20	21	24	66	85	38
7	33	39	16	13	14	13	59	38	61	59	295	64	57	54	41	15	17	18	23	20	59	66	45	44	28	13	47	17	4	10	8	27	18	34	27	84	34	18	13	10	8	20	10	19	21	22	67	87	38
7.25	35	42	17	14	17	14	60	41	65	64	294	68	59	57	45	17	20	19	26	21	62	69	49	44	30	14	50	19	5	12	9	30	20	38	29	90	35	19	13	11	10	20	11	20	22	23	71	91	40
7.5	32	41	14	11	15	12	57	41	66	63	294	68	58	55	45	16	19	18	25	20	62	69	49	42	27	12	48	18	2	9	7	30	17	37	27	92	32	15	10	7	6	18	10	18	19	21	70	91	36
7.75	32	42	16	12	18	13	60	43	70	68	294	72	59	56	50	18	22	20	28	22	65	71	51	44	27	12	49	20	3	10	9	33	17	38	29	98	32	17	11	9	7	19	10	19	20	22	71	93	36
8	34	46	17	13	21	14	63	48	73	72	296	77	63	60	54	20	26	22	32	25	69	75	55	45	29	14	52	22	5	11	10	36	19	43	31	103	32	18	13	10	9	21	12	20	22	23	74	97	38
8.25	34	47	17	14	22	14	62	49	75	74	295	79	66	59	56	21	26	22	32	25	70	76	56	45	30	14	52	23	4	10	10	37	18	43	32	106	34	19	13	10	9	21	11	20	22	23	75	98	39
8.5	36	50	19	16	27	16	65	52	79	80	296	84	68	62	60	24	31	25	35	29	74	80	60	46	32	15	55	26	6	13	12	39	20	46	35	110	36	20	15	10	10	22	12	22	23	24	78	102	40
8.75	35	49	17	14	27	15	65	53	80	81	297	85	68	61	60	24	30	24	36	28	75	80	60	45	29	14	54	26	4	12	11	39	18	47	34	112	34	18	13	10	9	20	11	20	21	23	78	103	40
9	32	50	17	12	26	14	64	54	83	84	295	88	69	62	62	24	31	24	38	28	76	82	63	45	27	13	55	26	3	9	12	41	18	48	35	113	32	17	12	8	7	19	11	19	21	23	79	105	36
9.25	37	54	19	15	32	17	67	58	88	89	295	93	72	65	66	28	36	27	42	33	81	87	66	48	32	16	59	32	8	13	14	45	22	53	39	118	36	20	16	11	11	23	14	22	24	25	82	108	41
9.5	37	54	20	16	34	18	69	60	91	92	296	97	74	67	68	30	39	29	43	34	83	88	69	47	32	17	59	34	7	13	15	47	22	54	41	121	35	21	16	12	10	24	13	22	25	25	85	111	42
9.75	35	53	17	14	32	15	67	60	92	93	295	98	74	64	67	29	38	26	43	33	83	88	69	45	30	15	59	32	4	11	14	45	19	54	41	120	34	18	13	9	8	20	12	20	22	24	83	110	40
10	36	56	18	15	35	16	69	61	95	97	295	103	75	67	69	31	40	28	45	35	85	90	72	46	31	17	59	35	6	11	15	47	21	56	44	124	35	20	14	10	9	21	12	21	23	24	85	113	40
10.25	37	58	20	16	37	17	70	66	100	100	295	107	78	68	72	35	43	29	48	37	88	92	75	48	32	17	61	38	6	11	15	50	20	58	46	126	36	20	14	11	10	22	13	22	24	25	87	116	41
10.5	35	57	19	15	38	16	69	66	101	101	295	110	78	67	71	34	44	29	49	37	89	93	77	46	30	17	61	38	5	11	15	49	19	59	47	127	34	18	12	9	8	20	13	21	21	24	87	116	39
10.75	36	60	20	15	40	16	70	69	104	106	294	114	82	69	74	37	47	30	52	39	91	96	79	47	32	19	63	41	6	12	17	51	21	61	50	130	36	19	15	11	10	22	13	21	23	25	88	118	41
11	37	62	20	16	44	17	71	70	107	109	295	120	85	71	76	39	50	32	54	42	94	98	82	48	33	20	64	44	7	12	18	53	22	63	52	132	37	20	15	12	10	22	13	22	23	25	89	121	42
11.25	38	64	21	17	46	18	70	73	110	113	295	126	87	72	78	41	53	33	57	43	97	101	84	50	34	21	67	46	7	14	19	55	23	66	55	135	37	21	17	12	12	24	15	24	25	26	92	124	43
11.5	38	63	21	17	47	18	69	74	111	116	295	129	87	73	79	42	55	33	58	44	98	101	86	49	33	21	67	48	7	13	18	55	23	66	55	135	37	20	16	11	11	23	14	23	24	26	92	124	42
11.75	37	64	21	17	48	18	70	75	113	119	294	133	89	73	80	43	56	34	60	45	100	103	88	49	33	22	67	49	7	13	19	56	23	67	58	137	37	21	16	12	11	22	14	22	24	26	93	126	42
12	39	66	22	18	51	19	73	77	117	122	294	137	92	74	81	46	59	36	63	48	102	105	90	50	35	23	69	53	9	14	20	57	23	70	60	141	38	21	17	13	11	24	15	24	25	27	94	128	44
12.25	38	67	22	17	52	19	73	79	121	126	294	141	91	74	83	48	62	37	65	50	105	108	94	51	33	24	70	54	9	14	21	59	24	72	62	143	37	20	17	11	11	25	15	24	26	28	96	130	41
12.5	38	69	23	17	54	19	73	80	122	128	295	144	94	76	84	49	63	37	67	51	107	110	94	51	34	25	71	56	9	14	21	60	25	74	64	144	38	21	17	12	12	25	15	24	26	27	97	132	42
12.75	37	68	20	16	53	17	72	78	120	128	292	143	94	74	83	48	61	35	66	50	104	108	93	47	32	24	69	56	6	11	19	57	21	71	61	143	36	19	14	10	9	21	12	21	22	25	94	130	42
13	38	71	23	18	56	20	75	82	124	133	294	149	97	76	85	51	65	38	69	54	108	112	98	51	34	27	72	60	7	14	22	61	24	76	67	148	38	21	16	12	12	24	15	24	25	27	98	135	43
13.25	38	72	23	18	56	19	77	83	126	134	294	153	97	76	87	52	66	39	71	56	110	114	100	52	34	28	72	62	8	14	22	61	24	77	67	149	37	21	17	12	11	24	16	23	25	28	98	135	42
13.5	40	73	24	20	59	21	78	85	130	138	294	155	101	79	89	55	69	40	74	59	113	116	104	54	35	30	74	65	9	14	24	63	26	79	70	152	39	22	18	13	13	25	15	25	26	28	100	138	45
13.75	38	74	22	17	57	19	78	84	129	137	293	155	99	77	88	55	68	39	74	57	112	115	104	52	33	29	72	64	7	13	22	62	23	78	69	152	35	19	15	11	10	23	14	22	24	26	99	137	41
14	39	75	23	18	59	20	80	85	131	140	294	159	101	78	89	56	70	39	75	60	114	117	107	52	35	29	73	66	6	13	23	62	24	80	70	152	38	21	16	12	11	23	15	23	24	27	100	138	43
14.25	40	78	24	19	61	20	81	87	135	143	293	161	104	79	90	59	72	41	79	63	115	120	109	54	35	32	76	69	9	14	24	64	24	82	72	154	38	22	17	12	13	24	15	24	25	27	101	140	44
14.5	39	78	22	17	60	19	80	87	136	143	293	162	103	79	90	59	71	40	80	63	116	119	110	53	33	31	75	69	7	12	23	64	22	82	72	155	37	19	15	11	10	22	14	23	24	27	101	140	42
14.75	40	80	25	19	64	22	82	89	140	146	294	166	105	81	92	62	75	42	81	67	119	122	113	56	36	34	77	72	9	15	25	66	26	86	75	159	39	22	18	12	12	25	16	25	26	29	104	144	44
15	39	82	24	18	65	20	81	90	141	147	293	168	106	81	92	64	76	42	83	68	119	124	114	57	34	35	77	74	7	14	25	66	25	86	76	159	38	21	16	11	11	24	15	23	26	28	103	144	42
15.25	40	82	24	19	66	20	81	90	142	149	293	169	107	81	92	65	76	42	83	69	120	124	116	58	35	36	76	75	7	13	25	66	25	87	75	160	39	21	16	12	11	23	15	23	25	28	104	146	44
15.5	41	83	25	20	69	22	81	91	144	151	294	171	110	83	94	67	79	43	86	71	122	125	117	61	36	39	79	77	9	15	27	67	26	89	78	163	40	23	18	13	13	24	16	25	26	28	105	148	44
15.75	42	85	26	22	71	22	82	93	146	153	293	173	112	84	95	69	80	43	88	73	122	127	119	62	39	40	79	79	10	14	28	68	26	90	78	163	41	23	18	14	12	24	16	24	26	28	106	149	47
16	41	87	26	20	73	22	82	94	148	155	294	177	111	84	95	70	82	45	90	75	125	129	122	65	37	41	81	81	9	16	29	69	27	92	80	165	38	23	18	13	13	25	17	26	27	29	107	151	44
16.25	39	86	25	19	74	21	81	93	149	155	293	177	110	84	95	71	81	44	89	76	125	128	122	65	35	39	79	80	8	13	28	68	26	92	80	166	38	20	17	12	11	23	15	23	25	27	106	151	43
16.5	40	88	26	20	75	21	82	94	150	157	293	178	113	85	96	73	82	44	92	79	126	130	124	67	37	41	80	82	8	14	29	69	27	94	81	167	39	22	17	12	12	24	16	23	26	28	108	152	45
16.75	43	91	29	22	79	23	84	98	155	161	294	182	115	87	98	75	85	46	95	82	129	132	127	70	39	45	83	85	11	17	31	71	29	97	84	170	41	24	20	14	14	28	17	26	28	30	110	156	47
17	40	90	27	20	79	23	84	98	155	161	294	183	114	86	97	75	85	47	95	82	130	133	127	72	36	43	81	85	10	15	31	71	29	98	84	171	38	22	18	13	12	26	18	25	28	30	110	157	43
17.25	43	93	29	23	81	24	85	99	157	164	294	184	117	88	100	79	86	47	98	85	131	135	129	73	40	46	84	87	11	16	32	72	30	99	86	173	41	25	21	14	15	26	18	26	28	30	111	159	47
17.5	44	94	30	24	83	25	85	101	158	166	295	186	119	89	100	79	88	48	99	87	131	136	131	75	40	46	84	88	12	17	33	73	30	101	86	173	43	25	21	16	15	27	18	26	29	30	112	160	48
17.75	39	92	26	20	82	22	83	100	158	165	294	186	116	87	99	79	85	46	99	88	132	135	131	75	35	44	82	86	9	14	32	72	28	101	86	173	38	20	16	12	12	24	17	24	27	29	111	160	43
18	45	95	30	25	86	26	86	101	161	169	295	189	122	91	101	82	89	49	103	91	133	137	133	78	42	48	85	90	11	18	34	74	31	104	88	175	45	27	21	16	15	28	18	27	29	31	115	163	50
18.25	43	96	30	23	87	25	86	103	162	170	295	190	121	90	102	83	90	49	104	93	135	139	134	79	40	49	86	91	12	17	35	74	32	105	88	177	42	25	20	15	15	27	18	26	29	30	114	164	48
18.5	43	97	30	22	87	24	86	104	163	171	294	192	121	91	102	85	91	50	105	95	136	139	135	82	39	48	86	91	11	16	36	75	31	106	89	178	41	24	21	14	14	27	18	26	29	31	115	165	45
18.75	40	97	28	23	89	24	86	103	164	171	295	193	119	89	101	85	91	48	107	96	136	140	136	84	39	47	84	91	10	15	35	75	31	107	89	180	40	23	18	14	13	27	18	26	29	31	115	167	46
19	43	98	31	24	91	25	88	105	166	174	295	194	123	92	102	87	92	50	108	99	138	141	137	85	41	49	86	93	12	17	36	76	34	108	90	181	43	25	22	16	15	28	19	27	30	31	116	168	48
19.25	43	98	29	24	90	25	86	105	166	174	294	194	123	92	102	87	92	49	109	99	137	140	137	85	40	49	86	92	11	16	35	75	32	109	90	181	42	25	20	14	14	26	18	26	28	29	115	168	47
19.5	42	99	30	24	92	24	87	106	167	175	294	196	124	92	104	88	93	50	110	101	139	142	139	87	40	49	87	93	10	15	37	76	33	110	91	182	41	25	20	14	14	26	17	26	28	30	116	168	47
19.75	42	100	29	23	93	25	87	107	168	177	293	197	124	92	103	89	94	51	111	102	140	142	140	89	39	49	86	93	11	16	37	77	34	111	92	184	40	23	21	14	13	26	18	25	28	30	117	170	45
20	42	100	29	23	94	24	87	107	169	178	294	198	124	93	103	90	93	51	112	104	140	144	141	91	40	48	86	94	10	16	37	76	35	112	92	184	41	23	20	13	13	27	18	26	28	30	117	171	45
20.25	44	102	32	25	97	27	88	109	172	181	294	200	126	94	105	92	95	52	115	106	143	145	142	94	42	50	88	96	12	17	38	78	38	113	94	186	43	26	21	15	16	28	19	27	29	31	119	174	48
20.5	45	102	32	25	97	27	89	109	173	181	294	201	128	95	105	93	96	52	117	108	143	146	143	96	44	51	89	97	13	18	38	78	39	114	94	187	44	27	22	16	15	28	19	27	29	31	120	175	48
20.75	41	101	28	23	96	24	87	108	172	181	293	201	125	93	103	91	94	50	116	108	142	145	143	97	40	49	86	94	10	15	37	77	39	114	93	187	40	23	18	13	12	26	17	25	27	29	118	174	46
21	43	103	31	25	99	27	89	111	175	183	294	204	127	94	105	93	97	53	119	111	145	147	146	102	42	50	88	97	12	17	39	79	44	117	95	190	42	25	22	16	14	28	20	28	30	33	121	178	47
21.25	41	103	28	23	98	24	88	111	175	184	294	204	126	95	104	94	95	51	119	112	145	147	145	103	41	50	88	96	10	15	38	78	44	116	94	189	40	23	19	13	12	26	18	26	28	31	120	177	44
21.5	42	103	29	24	99	25	88	110	175	184	294	204	128	96	104	93	96	51	120	113	145	147	146	105	43	50	89	97	11	14	39	78	47	116	94	190	41	25	20	14	14	26	18	26	28	31	120	178	46
21.75	41	104	29	24	100	25	89	112	177	186	294	206	127	96	106	94	96	53	122	115	147	148	147	108	42	50	89	98	10	16	39	80	50	117	96	191	40	23	20	14	13	27	18	26	29	31	121	180	45
22	44	105	32	26	102	27	91	113	179	188	294	208	131	98	106	96	98	53	125	117	148	151	149	111	47	51	91	100	13	16	41	81	54	120	96	194	44	26	23	16	15	28	20	28	30	32	123	182	49
22.25	42	105	30	25	102	25	90	113	179	188	294	207	129	98	105	95	97	52	125	117	148	149	148	112	44	49	89	98	11	15	39	80	54	119	95	194	41	25	20	14	14	26	18	26	28	31	123	182	46
22.5	43	107	32	25	103	27	92	114	181	190	294	209	131	99	106	96	98	54	127	119	149	151	150	115	47	51	90	100	13	17	41	81	58	121	98	197	42	25	22	16	15	28	20	27	30	33	124	185	47
22.75	42	105	30	25	103	26	90	113	180	189	293	210	130	98	105	96	97	53	127	120	148	150	150	115	45	50	90	99	10	15	40	80	59	120	97	196	42	24	20	14	13	26	18	26	28	31	123	184	46
23	43	108	32	25	105	27	92	116	182	193	294	212	131	100	107	97	99	54	130	122	151	153	152	119	47	52	92	102	12	17	41	82	62	123	99	198	41	25	22	15	15	27	19	27	30	32	125	186	46
23.25	41	106	29	26	104	26	91	114	183	193	294	212	130	99	105	97	99	53	131	123	150	153	152	121	46	50	90	100	11	16	40	82	63	123	98	199	42	25	20	16	13	27	20	27	29	32	125	188	47
23.5	43	109	32	25	106	29	93	116	184	195	294	214	132	101	107	98	99	55	133	124	153	154	154	123	48	51	92	102	13	18	42	83	65	124	99	201	42	26	23	16	15	30	21	28	31	34	127	189	47
23.75	42	108	31	26	106	28	92	116	184	195	294	215	131	100	107	97	100	54	133	125	153	155	155	124	47	51	91	101	11	18	41	82	66	124	100	201	41	25	21	15	15	28	19	28	30	33	127	190	46
24	41	108	31	25	107	28	93	116	185	196	294	216	131	100	107	97	100	55	134	127	153	155	155	126	46	51	91	102	12	17	42	84	68	125	100	202	40	24	21	15	15	28	20	28	31	33	127	191	45
24.25	43	110	33	26	108	29	93	117	187	198	295	218	132	102	108	98	100	56	136	129	155	156	158	129	48	51	93	103	12	19	43	84	70	127	101	204	42	26	23	16	16	29	21	29	31	34	128	194	48
24.5	42	108	30	26	108	28	92	116	186	198	293	218	133	102	106	98	99	54	136	128	154	155	156	128	48	51	91	102	11	16	42	83	70	126	100	204	42	25	21	15	15	27	19	27	30	33	128	193	48
24.75	43	111	32	26	110	29	93	118	188	200	294	219	134	103	107	98	100	56	138	130	155	157	158	131	49	52	93	103	13	18	43	84	73	127	101	205	42	25	22	15	15	29	20	28	31	33	129	195	47
25	42	111	31	26	110	29	94	118	190	201	294	220	133	103	108	99	101	55	139	131	156	157	158	134	47	51	93	103	12	17	43	85	73	128	101	207	41	25	22	15	15	29	20	29	31	35	129	197	45
25.25	45	111	33	28	111	32	94	118	189	203	295	222	135	104	108	99	101	57	141	133	156	158	160	134	52	53	93	104	14	18	44	85	74	129	102	208	44	28	24	17	16	30	21	29	31	34	131	197	50
25.5	44	111	32	27	112	32	94	117	189	203	293	222	137	105	108	100	101	56	141	133	156	157	159	133	51	53	94	104	13	17	44	84	75	129	100	207	45	27	24	16	16	28	20	29	30	33	130	197	49
25.75	44	112	33	28	113	32	94	118	191	204	294	223	136	106	109	100	101	57	142	134	157	158	160	136	52	53	94	105	14	18	44	85	76	130	102	208	44	28	24	17	16	29	20	29	31	34	131	199	49
26	43	112	33	26	113	32	94	118	191	205	293	225	135	105	109	99	101	56	143	135	159	160	161	138	50	52	94	104	13	17	44	86	77	130	103	210	43	26	24	16	15	30	21	29	31	34	132	201	47
26.25	45	113	34	28	113	34	95	119	192	206	294	226	135	105	109	100	101	57	145	136	159	160	162	140	52	53	94	105	14	19	45	85	79	131	103	211	45	28	25	18	16	31	21	29	31	36	133	202	49
26.5	43	114	33	28	113	33	95	119	193	207	294	227	135	105	109	100	101	58	146	138	160	161	163	140	50	52	95	104	14	19	46	86	79	132	103	213	42	26	24	16	16	31	22	29	32	35	133	202	47
26.75	44	113	33	29	114	33	96	120	194	208	294	228	136	107	109	100	102	58	147	139	160	162	164	142	52	53	94	105	15	19	47	87	80	133	104	213	44	27	25	17	17	31	23	30	32	35	134	204	48
27	42	112	31	27	112	32	93	118	192	208	294	228	134	105	106	98	99	56	146	138	159	160	163	141	49	50	91	103	12	17	45	84	79	131	102	212	42	25	22	15	14	28	21	28	29	34	132	203	46
27.25	43	112	32	27	113	33	93	118	193	209	293	229	134	106	107	99	99	55	147	139	160	160	164	142	50	50	92	103	12	17	44	84	80	132	101	214	42	26	23	17	15	28	20	28	30	34	132	205	48
27.5	46	115	34	29	116	34	95	120	195	211	294	231	137	108	109	101	102	58	150	142	162	162	166	144	53	53	94	105	14	19	47	87	83	134	104	216	45	28	25	18	16	31	22	30	32	35	135	206	50
27.75	44	115	32	28	115	33	95	120	195	211	294	232	134	107	108	100	101	57	150	142	163	163	166	145	49	52	94	104	13	19	47	87	83	134	103	216	42	26	24	16	16	31	22	30	32	35	134	207	47
28	43	114	32	27	115	33	95	120	195	212	292	232	136	108	108	100	101	57	151	143	163	162	165	144	51	53	94	104	13	18	48	87	83	134	102	216	43	26	24	15	15	29	20	28	31	33	134	206	45
28.25	42	114	31	26	114	32	94	118	195	212	292	233	134	107	107	99	99	56	151	143	162	161	165	144	48	51	93	104	12	16	46	85	82	134	100	216	41	24	22	13	14	26	20	27	29	33	134	208	45
28.5	44	115	33	28	116	34	95	120	197	214	293	235	135	109	109	100	102	58	153	145	165	164	167	148	51	52	94	105	14	18	49	87	85	136	103	220	43	26	24	16	16	30	22	30	32	35	136	210	47
28.75	44	115	33	28	116	35	96	120	197	215	294	236	135	109	108	100	101	58	154	146	164	164	168	148	50	52	94	105	13	19	48	86	86	136	104	221	43	26	24	16	16	30	22	30	31	36	136	211	47
29	43	114	31	27	115	33	94	119	196	214	293	236	135	108	107	99	100	55	154	146	164	163	168	148	50	51	94	104	11	17	48	86	85	136	103	220	42	24	23	15	14	28	20	28	30	34	136	211	47
29.25	45	116	33	28	117	35	96	120	198	217	293	238	137	110	109	101	102	58	156	148	165	165	170	150	53	53	95	105	14	19	49	87	88	138	104	223	44	27	26	17	16	30	22	31	33	36	137	214	49
29.5	44	116	33	28	116	33	95	121	198	218	293	238	135	109	109	100	101	57	156	148	166	165	170	151	51	52	94	105	13	18	49	87	88	138	104	223	43	25	25	16	16	30	22	30	32	35	138	214	47
29.75	43	115	32	27	115	33	95	120	199	217	293	238	135	108	108	100	101	57	157	149	165	165	170	151	49	51	93	104	12	18	49	87	88	138	103	223	41	25	23	15	15	29	21	30	31	36	137	214	45
30	44	118	34	29	118	35	97	121	200	220	293	240	138	111	110	102	103	60	159	151	167	166	171	153	51	54	95	107	14	20	51	88	90	140	105	225	43	27	26	18	17	31	22	31	33	36	139	216	48
30.25	44	117	34	28	119	35	96	122	201	221	293	241	137	112	110	101	103	59	160	152	168	167	172	154	52	53	96	107	15	19	51	88	91	140	105	225	44	26	26	17	17	31	22	31	33	37	140	217	48
30.5	43	116	32	27	116	33	95	120	199	221	293	241	135	110	108	100	101	57	160	152	167	165	171	154	49	51	93	105	13	17	49	86	89	139	103	226	41	24	22	16	14	29	21	29	31	35	139	217	46
30.75	44	117	34	28	119	35	96	122	202	223	293	243	137	112	110	102	104	60	162	154	169	168	174	156	52	54	96	106	15	20	52	89	92	142	105	228	43	26	26	17	17	31	22	32	33	37	141	219	48
31	42	116	31	27	116	33	95	120	201	222	293	243	135	111	108	100	101	58	161	154	168	166	173	155	50	51	94	104	12	18	50	87	90	140	105	228	41	24	23	15	14	28	21	29	30	35	140	219	44
31.25	46	117	35	30	119	35	97	122	202	225	294	244	139	113	110	103	104	59	164	157	170	169	175	157	54	54	96	107	16	21	52	89	93	143	105	229	46	28	27	19	18	31	23	32	34	38	142	221	50
31.5	42	117	31	26	116	32	94	120	201	223	291	244	135	112	108	101	101	57	163	156	168	166	172	155	49	51	94	105	11	16	50	87	92	140	103	227	41	23	23	14	14	27	20	28	30	34	140	220	45
31.75	44	117	33	29	118	35	96	121	203	225	293	246	137	113	109	102	103	58	166	157	169	168	175	158	52	53	95	106	15	19	52	89	93	143	105	230	44	27	25	17	16	31	23	31	32	37	142	223	48
32	45	119	34	29	119	36	97	122	204	227	293	248	138	113	111	103	104	60	167	159	171	169	176	159	52	55	97	107	15	20	53	90	95	144	106	231	44	27	27	17	17	31	22	32	34	38	143	224	47
32.25	44	118	33	29	118	34	96	122	203	226	293	248	136	113	110	102	103	59	167	159	171	169	176	158	51	53	96	106	14	18	53	89	95	143	105	231	43	26	26	16	16	30	22	31	32	37	142	224	47
32.5	46	119	35	30	119	35	97	123	206	228	293	250	138	114	111	103	105	60	169	160	172	171	178	162	53	54	97	107	15	20	53	91	98	145	107	233	44	27	26	18	17	31	24	32	34	39	144	226	48
32.75	44	118	33	28	119	34	96	122	204	228	292	249	137	113	110	102	104	60	169	161	172	169	177	160	51	53	96	107	14	19	52	89	96	144	105	232	43	26	26	16	16	30	23	31	33	36	142	225	48
33	46	117	34	30	119	35	96	123	204	229	293	250	139	114	110	103	103	59	170	161	171	169	177	161	54	55	96	107	15	19	53	89	96	144	105	233	46	28	26	18	17	30	23	31	32	37	144	227	50
33.25	43	116	32	27	118	35	95	122	205	229	293	251	137	112	108	101	102	58	171	161	171	169	178	162	51	52	95	106	13	18	52	89	96	144	105	234	43	26	24	16	16	29	22	30	32	37	144	228	47
33.5	44	120	35	28	120	35	97	124	206	230	292	252	138	114	111	103	105	61	173	164	173	170	179	164	52	54	98	108	15	21	54	91	99	145	106	235	42	26	27	16	18	31	24	32	34	38	145	229	46
33.75	43	116	32	28	118	34	96	122	205	229	293	252	136	113	108	102	102	58	173	163	171	169	179	163	52	53	94	105	13	19	53	88	97	144	105	236	43	25	25	17	16	30	23	31	32	37	145	229	47
34	46	117	34	30	120	36	97	123	206	232	293	254	139	115	110	103	105	59	175	165	172	171	180	165	54	54	96	108	16	20	54	90	99	145	106	237	45	28	26	18	18	31	25	32	33	38	146	231	50
34.25	45	120	35	29	120	36	97	125	208	232	293	254	139	114	111	104	106	61	176	167	174	171	180	165	53	55	98	109	15	20	56	92	100	146	106	237	44	27	27	18	18	32	25	33	33	38	147	231	47
34.5	43	118	33	28	118	35	96	123	206	232	292	254	136	113	109	102	103	59	175	166	173	170	180	166	51	52	95	107	13	18	54	89	99	146	106	238	42	25	24	17	16	31	26	31	34	38	146	232	46
34.75	47	119	36	30	121	37	98	124	208	233	294	256	139	115	111	104	106	62	179	168	174	171	182	168	54	55	99	109	15	22	55	92	101	147	108	238	45	28	28	19	19	33	27	33	35	40	147	233	50
35	45	119	34	29	120	35	98	124	209	233	292	256	138	114	111	104	105	61	179	169	174	171	181	168	52	54	97	109	15	20	54	91	100	147	106	238	43	26	27	18	18	32	26	33	34	39	147	234	47
35.25	45	119	34	29	120	36	98	124	210	234	293	257	138	115	110	104	105	62	180	170	175	171	182	168	53	54	97	108	16	21	56	91	100	147	107	239	43	27	27	17	18	32	27	33	34	39	148	235	48
35.5	44	117	33	28	119	34	96	123	208	233	292	258	136	113	109	103	103	60	179	169	173	170	182	168	52	53	95	106	14	19	54	89	99	146	106	240	43	26	24	16	15	30	26	32	33	38	147	235	47
35.75	47	119	35	30	121	36	98	125	210	235	292	259	139	116	111	104	107	62	182	171	175	172	183	169	54	54	98	110	17	21	56	92	101	147	107	240	45	28	27	19	19	32	28	34	35	39	149	236	49
36	44	118	33	28	119	34	96	123	209	234	292	258	138	114	109	103	105	60	181	170	173	170	182	169	52	54	96	108	13	18	53	90	100	146	107	240	42	25	25	16	15	30	25	31	32	37	148	236	47
36.25	46	120	35	30	122	36	98	125	211	236	293	261	139	116	111	105	107	62	184	172	175	172	184	171	55	55	98	110	16	21	56	93	103	148	108	242	45	27	27	18	19	33	28	33	35	39	150	238	50
36.5	47	120	35	30	121	35	98	125	211	237	292	260	140	116	112	106	107	62	185	173	175	172	184	171	55	56	99	110	17	21	55	92	102	148	108	242	45	29	27	19	19	33	28	33	35	39	150	238	50
36.75	48	119	35	31	122	36	98	125	211	237	293	261	141	116	111	105	108	62	185	173	176	172	184	172	56	56	99	111	17	22	56	92	102	149	108	243	47	29	28	19	18	33	28	33	35	40	151	239	50
37	46	118	35	30	121	36	98	125	212	237	293	262	139	115	110	105	106	61	186	172	175	172	185	172	54	55	97	109	16	21	55	92	102	149	109	244	44	27	27	18	18	32	29	33	34	40	151	240	49
37.25	46	120	35	29	123	36	99	126	213	238	293	264	139	116	112	106	107	63	187	175	176	173	185	174	54	56	99	111	16	21	56	93	104	149	109	245	44	27	27	18	19	33	29	33	36	41	152	241	48
37.5	45	118	33	28	120	34	97	124	211	237	292	262	138	114	110	105	104	61	186	173	175	171	184	172	52	53	96	108	14	19	54	91	101	148	106	244	42	25	24	16	17	30	27	31	32	38	150	241	47
37.75	46	121	35	30	122	37	98	126	213	239	293	264	140	116	112	106	107	63	189	175	177	173	186	174	54	56	99	111	17	21	56	93	103	149	108	245	44	27	27	19	19	33	29	34	35	40	152	242	48
38	47	119	35	30	122	37	98	125	213	239	293	265	140	117	111	106	107	62	190	175	176	172	186	174	55	56	98	110	16	21	56	92	102	148	108	246	46	28	27	18	18	32	28	33	34	39	152	243	50
38.25	45	118	33	28	121	35	97	125	213	239	292	265	137	115	110	105	105	61	189	174	175	172	186	174	53	54	97	109	15	19	55	91	102	149	108	246	44	26	26	17	17	32	28	32	34	39	152	244	47
38.5	45	118	33	28	121	35	97	124	212	239	292	265	138	115	110	105	105	61	190	174	175	172	186	174	54	54	97	109	14	20	54	92	102	148	107	247	44	26	25	17	17	31	28	32	32	38	152	244	48
38.75	44	118	34	29	120	35	97	124	214	240	292	265	138	115	110	105	106	62	191	175	175	172	186	175	53	53	96	109	14	19	55	91	102	150	108	247	43	26	25	17	17	31	28	31	34	39	152	244	47
39	47	121	36	30	124	37	99	126	214	242	292	267	141	118	112	108	108	63	193	176	177	173	187	176	55	56	100	112	17	21	57	93	104	150	109	248	44	28	28	18	20	33	29	33	35	40	153	246	48
39.25	46	120	34	29	122	35	99	125	214	241	292	267	140	116	111	105	108	62	194	176	176	173	187	176	54	55	98	110	16	20	55	92	103	149	108	248	44	27	26	17	18	32	29	33	34	40	153	246	48
39.5	45	117	34	29	121	36	97	125	214	241	293	267	139	115	110	106	106	61	194	176	176	173	187	176	54	54	96	109	15	20	54	91	102	150	108	249	44	27	26	17	18	31	29	32	33	39	153	246	48
39.75	47	121	36	30	123	37	99	126	215	243	291	268	140	118	112	107	109	64	196	177	177	174	187	177	56	56	100	112	17	22	57	93	104	151	109	249	45	28	28	19	19	33	30	33	35	41	154	247	49
40	46	120	36	30	123	37	99	127	215	243	292	269	139	116	111	108	108	62	196	177	177	174	188	177	55	55	97	111	16	22	56	93	104	151	110	251	45	27	27	19	19	33	30	34	35	41	154	248	50
40.25	47	122	36	30	124	37	100	127	217	243	293	269	141	117	112	107	109	65	198	178	178	174	188	178	55	56	100	112	17	22	57	94	105	152	109	251	44	27	28	18	19	34	30	33	36	41	154	248	48
40.5	45	119	34	28	123	36	99	126	215	243	292	269	139	116	111	107	107	63	198	178	178	174	188	178	54	54	98	111	15	21	56	94	104	151	110	251	42	26	26	17	18	32	30	33	35	40	153	248	46
40.75	47	121	37	30	124	38	100	127	217	244	293	271	141	118	112	108	109	64	199	178	178	174	190	179	57	56	99	112	17	23	56	94	105	152	110	253	47	28	28	20	20	35	31	34	35	43	154	250	50
41	46	122	36	29	125	37	100	127	217	245	293	272	139	117	113	108	110	65	200	179	179	175	190	179	54	56	100	112	17	23	57	95	106	153	111	253	43	27	27	18	20	34	31	34	36	43	155	251	47
41.25	48	120	37	30	124	37	100	127	216	245	292	271	141	118	112	108	109	64	201	178	178	174	189	179	57	56	99	112	17	22	57	94	105	152	110	253	46	29	28	19	20	34	30	33	35	41	155	251	50
41.5	45	120	35	28	123	35	98	127	216	245	292	271	139	116	111	108	108	63	202	179	178	174	189	179	54	55	98	111	15	21	56	93	105	152	109	253	43	27	26	17	18	32	30	34	35	40	154	251	47
41.75	48	121	36	29	125	37	100	128	217	245	292	272	142	118	113	108	110	64	203	180	179	175	190	180	55	57	99	113	17	23	57	95	105	153	111	254	44	28	29	18	19	33	30	34	35	42	155	251	48
Data File	J:\Service\Customer\400\411\ShID_561\data\Assays\10144\crod_SIDx6450xICC169___3_37_144_209_Marx27x2013_A_02A.oka
Set up Time	Mar 27 2013 5:31 PM
Position	2-A
Plate Type	PM03-B
Strain Type	NOT APPLICABLE
Sample Number
Strain Name	Crod
Strain Number	SID_6450_ICC169
Other
Hour	A01	A02	A03	A04	A05	A06	A07	A08	A09	A10	A11	A12	B01	B02	B03	B04	B05	B06	B07	B08	B09	B10	B11	B12	C01	C02	C03	C04	C05	C06	C07	C08	C09	C10	C11	C12	D01	D02	D03	D04	D05	D06	D07	D08	D09	D10	D11	D12	E01
0	17	6	7	0	0	0	2	3	6	5	18	23	17	3	5	0	0	0	1	1	3	5	12	28	86	3	3	2	0	2	0	0	3	4	12	22	14	3	5	0	0	4	0	3	3	3	11	21	16
0.25	17	4	7	0	0	1	8	4	10	10	28	27	17	3	6	0	0	1	7	4	4	10	16	38	78	2	2	1	0	3	0	2	6	10	17	31	14	4	3	2	0	8	0	9	7	10	17	32	17
0.5	17	3	7	0	0	2	7	5	11	9	27	30	18	3	7	0	0	1	9	7	7	12	18	42	74	3	2	2	0	3	0	5	9	12	20	36	14	3	4	3	0	10	2	12	11	14	21	38	16
0.75	18	4	8	1	0	2	9	7	12	11	27	31	18	3	7	1	0	2	11	8	8	13	18	42	73	4	2	3	0	4	0	7	10	14	20	37	16	5	4	4	0	12	3	13	13	14	22	39	18
1	19	5	8	1	0	2	10	8	14	10	28	34	18	4	8	1	0	4	11	10	10	14	21	44	71	5	4	4	0	5	1	9	13	15	23	40	16	6	6	4	1	14	4	15	15	16	24	40	18
1.25	18	5	8	1	0	3	10	8	15	11	29	34	19	3	7	1	0	3	10	9	9	14	20	42	69	5	2	3	0	5	0	8	12	15	23	40	17	5	5	4	1	14	4	15	13	17	23	40	19
1.5	19	5	9	3	1	4	11	8	15	12	28	33	20	3	8	1	0	3	11	8	8	14	19	40	66	5	3	3	0	4	0	7	10	13	21	38	17	5	6	3	1	13	3	12	12	17	21	37	20
1.75	22	8	11	6	4	6	15	10	18	16	32	36	24	5	9	5	3	6	14	11	11	16	21	40	67	7	5	6	0	8	3	10	12	16	23	40	23	9	8	7	4	14	6	16	15	19	24	41	26
2	20	6	11	5	3	5	14	9	16	14	30	34	22	5	9	3	1	4	12	9	10	15	20	38	64	7	6	5	0	6	3	8	11	15	22	38	23	8	7	6	4	14	5	15	13	16	23	39	25
2.25	21	6	10	5	3	7	14	9	16	15	31	35	24	5	9	4	2	6	12	10	10	16	20	38	62	7	5	6	0	6	2	9	11	15	23	39	26	8	7	7	4	15	5	14	15	17	24	40	28
2.5	21	7	10	6	4	7	15	11	18	16	32	37	24	5	11	4	3	7	13	11	11	17	22	39	60	7	6	6	0	6	3	10	12	16	23	40	25	8	7	7	5	15	6	15	15	17	25	41	27
2.75	24	9	12	8	6	8	17	11	20	18	34	39	26	9	12	7	4	9	14	12	14	21	24	39	59	9	9	9	1	8	5	11	14	18	24	42	27	11	10	8	6	17	8	17	17	20	27	43	28
3	24	9	12	8	6	9	21	13	23	21	35	40	27	12	12	8	5	9	15	12	17	26	24	41	58	9	12	9	2	8	5	13	15	18	25	43	28	11	10	9	6	17	8	18	18	20	30	46	30
3.25	22	8	10	6	3	7	23	11	23	22	36	38	25	14	10	6	3	8	14	11	19	28	23	40	52	8	13	8	0	6	3	10	12	16	24	44	27	9	7	7	5	16	7	15	16	18	32	48	28
3.5	24	9	11	7	5	8	26	14	28	27	39	40	28	19	12	7	4	8	14	12	24	34	25	41	51	9	20	9	1	7	5	12	13	18	25	45	28	10	9	7	6	17	8	17	17	18	35	52	29
3.75	27	12	13	10	7	10	29	19	32	32	44	42	33	25	15	9	6	10	16	14	30	40	29	41	51	12	26	10	2	9	6	14	15	19	25	47	30	12	12	9	8	18	10	18	18	20	39	56	33
4	28	12	13	10	7	10	29	23	35	34	56	46	36	30	18	9	7	11	17	15	37	45	34	44	47	11	32	11	4	9	7	17	18	20	26	51	29	13	11	8	9	19	11	19	19	22	44	61	31
4.25	27	13	13	10	8	12	34	23	36	35	76	46	39	34	21	10	8	11	17	16	42	48	37	42	47	11	36	10	3	9	7	15	16	20	27	52	31	12	11	9	8	20	11	19	19	21	46	65	33
4.5	28	15	14	11	8	11	39	26	40	39	113	49	42	37	23	10	8	12	17	16	45	52	41	44	43	11	40	10	4	10	8	17	17	21	28	56	30	13	11	8	8	20	10	19	19	21	49	68	33
4.75	30	18	15	11	9	12	44	29	46	43	168	53	46	41	27	11	9	15	18	18	51	56	44	46	43	13	46	13	5	11	9	19	18	24	29	60	31	14	13	10	9	21	12	21	20	23	53	73	34
5	28	19	15	11	8	12	46	30	48	45	232	55	47	44	30	11	8	16	18	19	53	58	46	44	39	13	48	12	4	10	7	19	17	27	28	62	31	12	11	10	7	20	11	20	19	22	56	77	33
5.25	30	22	15	11	11	11	48	33	51	48	270	58	49	46	34	11	11	18	19	22	57	61	48	46	37	13	50	13	4	10	9	19	18	29	29	66	32	14	11	9	8	20	12	20	20	22	60	79	34
5.5	30	25	16	11	14	12	52	36	55	51	286	60	51	49	38	13	11	19	21	23	58	63	49	45	36	12	53	15	5	10	8	20	17	32	29	69	32	14	11	9	8	20	11	20	20	22	62	82	33
5.75	31	29	18	13	21	13	55	40	59	55	287	64	55	53	44	16	16	21	23	26	63	67	53	46	36	15	56	18	6	12	10	22	19	36	31	75	34	15	13	10	9	22	13	21	22	23	65	87	35
6	29	28	16	12	22	12	58	42	60	57	285	66	56	53	46	15	16	22	23	28	64	69	54	46	32	12	57	18	5	10	9	24	18	37	29	79	32	14	10	8	8	21	12	20	20	22	67	90	34
6.25	30	31	16	12	26	13	59	46	62	59	284	69	58	54	51	17	19	23	25	31	68	71	56	45	32	13	59	20	4	10	10	28	18	40	30	82	32	13	11	9	9	20	11	21	20	22	70	92	34
6.5	32	35	17	13	32	14	64	51	67	61	284	72	61	56	58	20	24	26	28	33	71	74	59	45	33	14	62	23	6	11	11	32	19	43	31	88	34	15	13	10	10	21	13	20	21	22	72	96	36
6.75	30	34	16	12	34	13	65	48	67	64	283	74	62	58	59	20	25	26	27	34	73	75	60	45	31	13	61	22	5	10	11	34	18	44	30	92	32	13	11	9	8	20	11	19	19	21	73	98	34
7	34	39	20	15	42	15	71	54	73	69	285	81	67	61	66	24	32	31	33	40	78	80	64	48	35	16	65	27	8	14	15	40	22	51	34	100	36	17	15	11	11	23	15	23	23	25	78	103	37
7.25	32	38	17	13	42	15	72	56	75	71	285	84	67	61	66	25	33	30	32	41	79	82	65	47	31	14	64	27	5	11	14	42	21	51	34	104	33	14	12	9	9	21	13	21	22	24	79	105	35
7.5	33	42	20	14	50	15	76	67	79	75	285	87	70	62	71	27	37	33	36	44	83	85	68	48	32	16	67	32	7	12	17	45	22	54	36	109	34	16	14	10	11	24	14	22	23	24	81	109	37
7.75	34	44	19	15	52	16	78	69	82	76	286	90	71	64	74	29	39	34	38	46	86	88	71	48	32	16	68	34	8	12	19	46	23	57	37	112	34	16	14	10	9	23	14	22	22	24	82	110	37
8	33	43	18	14	53	15	79	69	83	78	287	93	73	64	74	31	41	34	40	48	87	89	73	48	31	16	68	35	5	11	19	48	23	58	38	115	34	15	12	10	10	22	14	23	22	23	85	113	37
8.25	34	47	19	15	57	17	83	71	87	80	288	97	76	66	78	33	45	37	44	51	91	92	75	49	32	18	71	38	8	13	21	50	25	61	40	118	36	16	15	11	12	23	15	23	22	24	86	115	38
8.5	35	48	20	15	58	17	86	76	89	83	287	100	78	68	80	35	48	39	46	54	94	95	77	49	33	19	72	40	8	13	23	52	26	63	42	122	37	16	15	11	12	24	15	24	23	25	88	118	40
8.75	35	50	20	15	61	17	88	76	93	87	287	105	81	70	84	38	51	40	48	58	97	98	80	50	32	21	74	45	8	13	25	54	28	65	45	124	36	16	14	11	11	23	16	24	24	26	90	121	38
9	37	53	22	16	65	18	93	79	96	90	289	109	83	71	86	41	55	42	52	62	100	100	83	51	34	22	75	47	9	15	28	56	31	69	48	129	37	18	16	12	13	25	17	25	25	27	93	124	40
9.25	36	54	22	17	68	19	95	83	98	92	289	113	85	72	87	43	57	45	55	65	103	103	85	51	34	24	76	50	10	15	29	58	32	70	49	131	37	17	17	13	13	25	17	25	25	27	94	126	41
9.5	37	54	21	16	69	18	96	83	98	93	288	115	86	73	88	43	58	44	56	67	103	103	86	49	34	24	77	51	9	13	29	59	31	71	50	132	37	17	16	12	12	23	15	23	23	26	93	126	40
9.75	39	57	22	17	71	20	101	87	103	97	289	121	90	75	91	46	62	47	60	71	106	107	90	51	35	26	79	54	10	15	31	60	34	73	54	135	39	18	17	13	13	25	17	25	26	28	96	130	42
10	37	57	22	17	72	20	103	90	106	101	289	126	92	76	94	49	65	48	63	74	109	109	92	53	33	28	81	56	11	15	32	63	37	76	56	138	37	18	17	12	12	25	17	25	27	28	98	132	40
10.25	39	60	23	18	74	20	105	96	110	104	289	131	94	77	95	50	66	49	65	77	110	111	93	52	36	30	82	59	11	15	34	64	38	76	58	141	39	19	18	14	14	26	17	26	26	28	100	134	42
10.5	36	59	21	16	73	18	106	97	112	107	289	135	92	75	96	52	66	49	66	78	111	111	95	52	32	30	81	58	8	13	33	63	37	77	58	141	36	16	15	10	10	23	16	24	25	27	100	135	38
10.75	38	61	21	17	74	18	107	100	114	108	288	138	96	76	96	53	68	49	69	81	113	113	97	51	35	30	81	61	8	13	33	64	38	78	61	143	39	16	14	11	12	24	16	24	23	26	101	136	42
11	37	63	22	17	77	18	109	102	116	110	287	142	98	77	98	55	70	50	71	84	114	114	99	51	34	32	83	63	8	13	34	65	40	80	62	145	37	16	15	12	11	24	16	24	24	26	101	138	41
11.25	39	66	23	17	79	21	114	105	119	113	288	146	101	79	100	58	72	53	75	87	117	117	103	52	36	34	85	66	10	14	36	67	42	82	66	148	39	18	16	12	13	25	16	25	25	28	104	140	43
11.5	38	67	23	17	79	20	116	110	121	116	288	150	101	79	101	59	74	52	76	89	119	119	105	53	34	34	84	68	9	13	37	68	43	84	67	149	38	17	15	11	12	24	17	25	25	27	104	142	42
11.75	39	70	23	18	82	20	118	113	123	118	288	154	105	81	102	62	76	55	78	92	121	120	108	53	36	37	85	70	10	14	38	70	46	86	70	152	39	18	16	13	12	25	17	25	25	28	106	143	43
12	37	71	22	17	81	19	120	114	124	120	286	156	104	81	103	63	77	55	81	94	122	121	109	53	32	38	86	71	9	13	38	71	46	87	72	152	37	16	16	11	11	24	16	24	24	27	105	145	40
12.25	40	74	25	20	85	22	124	118	128	123	288	160	108	84	105	66	80	58	84	98	125	125	112	55	36	40	89	75	11	15	40	73	51	90	75	156	40	19	18	13	13	26	18	26	27	29	109	148	43
12.5	38	74	24	18	84	20	124	118	128	124	287	163	108	83	106	67	80	58	86	99	127	126	113	56	33	41	88	76	10	15	41	74	51	91	77	158	37	17	16	11	12	25	18	26	25	28	108	149	40
12.75	43	78	26	20	87	22	128	122	132	126	288	166	112	85	108	70	83	60	88	102	129	129	116	57	38	44	91	79	11	16	42	76	55	94	79	161	41	20	18	13	14	27	18	27	28	29	111	152	45
13	42	77	25	18	87	22	130	123	133	128	288	169	111	85	108	71	85	61	91	104	129	130	118	60	33	44	91	80	11	15	43	77	56	96	81	162	37	18	17	12	13	26	18	26	27	29	111	152	40
13.25	47	80	28	21	91	22	131	125	137	130	288	171	115	88	110	72	86	62	93	107	131	130	120	61	38	46	92	84	12	17	44	77	59	96	83	164	42	20	19	14	14	26	19	26	27	30	113	155	46
13.5	48	81	28	20	91	21	134	127	138	132	288	174	115	88	111	74	88	63	94	110	133	133	121	63	36	48	94	85	11	16	45	78	61	98	85	165	39	19	18	13	14	26	18	27	28	30	113	155	42
13.75	51	84	30	21	94	24	136	129	141	135	288	176	118	89	112	77	90	65	97	113	135	135	124	65	39	50	95	89	13	17	46	80	64	100	87	167	43	21	20	15	16	28	20	28	28	31	114	158	46
14	51	85	31	20	94	23	139	130	141	137	288	180	119	90	114	78	92	66	99	115	136	136	125	69	36	52	97	90	14	18	48	81	66	103	89	170	39	20	20	14	16	29	20	29	29	31	116	159	43
14.25	54	86	32	22	96	23	139	132	142	137	287	179	121	91	114	80	92	67	100	116	136	136	126	69	39	53	97	91	13	16	48	81	67	103	90	170	42	20	19	15	15	27	19	28	28	30	116	160	46
14.5	52	84	32	19	95	22	141	132	142	138	287	183	119	89	114	80	92	67	102	117	138	137	126	71	34	52	97	91	11	14	47	82	68	104	91	172	37	18	17	12	13	26	18	26	27	30	116	161	40
14.75	59	90	36	24	99	25	144	135	147	141	288	185	125	92	116	83	96	69	105	122	140	140	130	73	42	55	99	95	14	18	50	83	72	107	94	174	45	23	21	17	17	28	21	28	29	31	118	164	48
15	57	89	36	22	99	23	145	135	147	143	287	186	124	92	118	85	96	71	106	124	141	140	130	76	37	56	100	96	14	17	51	85	72	108	94	174	39	20	20	14	14	27	19	28	28	30	118	164	43
15.25	59	90	39	22	100	24	148	137	148	143	287	188	126	93	117	86	97	71	108	126	141	141	133	78	41	58	99	96	13	17	51	84	75	110	95	176	42	21	20	15	16	28	20	28	28	31	119	166	47
15.5	59	90	39	20	100	24	151	138	149	145	287	191	126	93	118	87	98	72	110	128	143	143	134	80	36	58	101	98	12	17	53	86	76	111	97	178	38	20	20	13	14	27	20	28	29	31	120	166	42
15.75	63	93	42	23	101	25	153	140	152	147	287	191	129	95	119	89	100	73	112	130	143	143	135	81	42	60	102	101	13	18	53	86	80	113	99	179	44	22	21	17	16	28	19	28	29	31	120	167	48
16	61	94	44	23	102	26	156	141	154	150	289	195	129	97	121	92	101	76	115	133	147	146	137	86	38	62	104	101	14	19	56	88	83	116	101	182	39	22	22	16	16	30	22	30	32	33	123	170	44
16.25	62	92	43	23	102	24	155	141	154	149	287	195	130	95	119	90	100	74	114	133	145	146	136	85	39	60	101	101	12	15	53	86	82	114	99	181	41	20	19	15	14	27	20	27	27	31	122	169	46
16.5	63	95	46	23	104	25	159	143	156	152	288	198	131	97	121	93	101	77	118	135	148	147	139	88	38	63	104	104	14	17	56	88	86	118	102	184	40	21	21	15	15	29	21	29	30	32	123	172	44
16.75	65	96	47	24	105	26	161	145	158	153	288	199	132	98	122	95	103	77	119	138	149	149	141	90	41	64	104	105	14	18	57	89	89	119	103	185	43	23	21	15	15	28	21	30	30	33	124	173	47
17	65	96	49	23	105	26	163	145	158	155	287	201	132	98	123	96	104	79	121	140	150	150	142	92	39	65	105	105	14	18	57	91	92	121	104	186	41	22	22	14	16	29	21	29	30	33	125	174	45
17.25	67	98	51	24	107	27	165	147	160	156	287	203	135	100	124	99	105	80	123	142	152	152	143	93	42	67	106	107	15	18	59	91	95	123	106	187	42	23	23	16	16	30	22	30	31	33	125	176	47
17.5	67	95	49	24	107	25	164	147	160	156	287	203	134	99	123	97	104	79	123	142	151	150	143	94	40	66	105	106	13	17	58	89	95	123	104	188	42	21	21	14	14	27	21	29	29	31	125	176	47
17.75	69	99	54	25	109	27	168	150	163	160	288	206	137	101	126	102	108	83	126	147	154	153	146	98	40	69	108	110	15	19	61	94	100	125	108	191	43	23	23	16	17	31	22	31	32	34	128	178	46
18	70	101	55	26	110	28	170	152	164	160	288	207	139	102	126	102	109	83	128	147	154	154	146	99	44	70	108	111	17	19	61	93	102	126	108	192	45	24	23	17	18	31	22	31	31	34	129	179	49
18.25	70	100	56	24	110	27	172	152	166	163	288	209	138	102	127	104	109	84	130	149	156	156	148	101	41	70	109	111	16	18	62	95	104	128	110	193	41	24	23	16	17	30	22	32	31	34	129	181	45
18.5	70	100	56	25	110	27	171	153	165	163	287	209	139	102	126	103	108	84	130	150	155	155	148	101	43	69	108	111	15	19	62	93	105	127	109	194	44	23	22	16	17	29	22	30	30	34	129	181	48
18.75	71	102	58	24	112	27	175	155	168	166	288	212	140	104	127	106	110	87	133	152	158	157	150	105	40	72	109	113	15	19	64	96	108	130	111	196	41	23	23	15	16	31	22	32	32	35	131	183	45
19	73	103	58	26	113	28	174	155	168	167	288	212	142	105	128	106	111	87	134	154	158	157	151	105	45	72	111	114	16	19	65	96	110	130	111	197	45	24	24	17	18	31	22	31	32	34	131	184	50
19.25	72	102	60	25	113	28	178	156	170	168	289	215	142	105	129	108	112	88	136	156	160	159	152	109	41	72	111	114	16	18	65	97	112	132	113	200	41	24	24	16	17	30	23	32	33	36	132	185	45
19.5	74	105	60	27	114	29	178	158	171	169	288	215	144	106	129	108	112	89	137	156	160	159	153	110	45	73	111	115	16	19	65	96	114	133	113	200	45	25	24	17	18	30	23	32	33	35	133	187	50
19.75	71	102	60	24	113	26	179	158	173	170	289	217	142	105	128	108	111	89	137	158	161	160	154	112	41	71	110	115	14	18	65	98	114	133	113	200	39	22	22	14	16	29	21	32	31	35	133	187	44
20	74	106	62	28	115	29	180	159	173	171	289	217	145	107	130	110	114	90	140	159	161	160	155	114	49	74	113	116	17	19	67	98	117	134	114	202	47	25	25	18	18	31	23	31	32	35	133	188	51
20.25	73	106	63	25	115	29	182	160	175	173	289	219	145	108	131	112	114	92	141	161	163	162	156	117	45	74	113	117	16	19	67	100	119	136	116	203	42	24	24	16	17	30	23	32	33	36	135	190	46
20.5	75	106	64	28	118	29	182	161	175	174	288	219	147	108	130	112	114	92	142	161	163	162	157	118	52	75	112	118	16	19	67	99	120	136	115	204	47	26	25	18	18	31	23	31	32	35	136	191	51
20.75	72	105	64	25	116	27	183	161	176	175	288	220	145	107	131	112	114	91	143	162	163	163	157	120	47	73	112	117	14	18	68	99	121	136	115	205	41	22	23	15	16	29	22	31	32	35	135	191	44
21	75	108	65	28	119	29	184	164	177	177	289	222	148	110	132	114	116	93	144	164	165	164	159	123	54	75	114	120	17	19	70	100	124	138	117	206	47	25	25	18	18	31	23	32	32	36	137	193	50
21.25	74	108	66	27	119	29	186	165	179	178	289	223	148	110	132	115	117	94	147	165	166	165	160	127	53	76	115	119	17	20	71	101	124	139	118	208	44	25	24	17	18	31	24	34	34	37	137	194	48
21.5	75	108	66	27	119	29	186	165	178	179	288	224	149	110	132	115	117	94	147	166	167	165	160	128	56	75	114	120	16	20	71	101	125	139	118	209	45	25	24	17	18	31	23	33	33	36	137	195	50
21.75	75	109	67	27	120	30	187	166	179	180	288	225	149	111	133	115	118	95	148	167	167	165	161	131	57	75	115	120	16	18	71	102	127	140	118	209	45	25	25	17	18	31	22	33	33	37	138	195	49
22	74	108	65	26	120	29	188	167	180	181	288	227	149	111	132	115	117	96	149	167	167	166	162	134	57	74	114	120	15	19	71	102	127	141	119	211	44	24	24	16	17	31	23	35	33	37	138	197	49
22.25	73	107	64	26	119	29	188	167	180	181	288	227	148	111	132	115	116	94	149	168	167	166	162	135	57	72	113	119	14	18	71	102	127	141	118	211	43	23	22	16	16	29	22	35	31	35	139	198	47
22.5	74	108	66	26	120	30	189	168	182	182	287	228	150	111	132	116	118	96	150	169	168	167	163	137	59	73	115	120	15	18	72	103	128	142	119	213	43	23	23	16	16	30	22	38	32	37	139	198	47
22.75	75	110	67	28	123	33	190	170	183	184	289	230	152	113	134	117	120	97	153	171	170	168	165	141	62	75	116	122	17	21	74	104	130	144	121	214	45	26	26	17	19	31	23	41	33	39	141	200	50
23	73	108	65	27	121	32	189	170	182	183	287	230	150	112	132	116	118	95	152	171	169	167	164	140	61	73	114	121	15	18	72	103	129	143	118	214	44	23	22	16	16	29	22	41	31	37	140	199	47
23.25	74	109	65	27	121	33	190	171	183	185	287	232	150	113	132	117	118	96	153	172	170	168	165	143	61	74	115	121	15	18	73	103	129	144	119	215	44	24	23	16	16	29	22	44	31	38	141	201	49
23.5	76	111	69	29	125	36	193	173	186	188	289	233	153	116	135	120	122	99	157	175	173	170	167	147	65	77	118	124	18	21	76	105	134	146	123	218	46	26	27	18	19	33	25	49	34	39	143	203	50
23.75	75	111	68	27	124	35	193	174	186	187	288	234	152	115	134	119	120	98	157	175	172	170	167	147	64	75	117	124	15	19	75	105	133	146	121	217	44	25	25	15	17	31	24	50	33	38	143	203	48
24	76	112	69	29	126	38	194	175	187	189	288	235	154	117	135	120	122	99	158	176	174	171	169	150	66	75	118	125	17	20	77	106	135	148	122	219	46	26	27	18	20	32	24	53	34	40	145	205	51
24.25	75	111	68	28	125	38	194	176	188	190	288	236	153	116	135	119	122	98	158	176	174	172	169	151	66	75	118	125	16	20	77	106	135	148	122	220	44	24	27	17	18	30	23	55	34	38	145	205	48
24.5	76	113	70	30	127	40	195	177	189	192	288	237	155	118	136	121	123	99	161	179	175	173	171	154	67	77	119	126	17	21	78	107	136	150	124	222	46	26	30	18	19	32	24	58	35	40	147	206	50
24.75	76	113	69	29	127	41	196	178	189	193	288	238	155	118	136	120	123	99	161	179	175	173	172	155	67	76	119	126	17	21	78	108	136	150	124	223	46	27	30	18	19	32	25	60	34	41	147	208	50
25	76	113	69	29	128	43	197	178	190	194	289	240	155	119	136	121	123	100	162	180	177	174	173	157	67	76	119	127	18	22	79	109	138	151	125	224	46	26	32	18	19	33	25	62	35	42	147	209	50
25.25	73	111	68	28	126	42	198	179	191	195	289	240	153	117	135	120	122	101	163	180	178	174	173	159	63	75	119	126	16	20	79	108	136	151	124	226	41	23	31	15	17	31	24	63	34	41	147	208	45
25.5	76	112	68	30	128	43	197	180	190	195	289	241	155	119	135	120	123	99	163	181	177	175	173	160	67	76	119	127	17	21	78	109	138	152	125	227	46	25	33	17	19	32	25	65	34	41	148	210	49
25.75	76	114	71	29	129	44	199	181	192	197	289	242	157	120	137	122	124	101	166	183	178	175	174	162	67	77	121	128	18	21	81	110	140	153	126	227	45	26	36	18	19	32	26	67	35	42	149	210	49
26	77	114	70	31	130	46	199	182	193	199	289	243	158	121	137	122	124	101	167	184	179	177	175	163	70	77	121	129	19	22	80	110	141	154	125	228	47	27	38	19	20	33	26	69	36	42	150	212	52
26.25	76	115	70	29	130	47	200	182	193	199	288	245	157	122	137	122	125	102	169	184	180	177	176	165	67	77	122	129	18	22	82	111	141	154	126	230	44	26	38	18	20	33	26	70	37	43	150	212	49
26.5	75	113	67	29	128	46	198	181	191	198	287	243	157	120	135	120	122	99	167	184	179	175	174	163	68	75	119	127	16	19	80	109	140	153	125	228	45	25	37	17	18	30	24	69	35	41	149	213	50
26.75	75	114	69	29	129	47	200	184	194	200	288	246	156	122	136	121	123	101	169	185	181	177	177	166	66	75	120	128	17	21	81	111	141	154	125	231	42	24	39	17	18	32	25	72	37	42	150	213	47
27	77	115	71	31	131	49	202	185	195	202	288	248	158	123	137	122	125	102	172	186	182	179	177	167	69	78	122	130	20	23	83	112	143	156	126	231	46	27	42	18	21	33	26	74	38	44	151	215	50
27.25	76	114	69	30	130	49	201	185	194	202	288	248	157	122	136	120	123	101	172	187	181	178	178	168	68	76	121	129	17	21	82	111	142	157	126	232	45	26	42	17	19	32	26	75	39	43	152	215	49
27.5	76	115	70	29	131	50	202	186	195	203	288	249	157	123	136	121	123	102	173	188	182	178	178	168	68	76	121	129	18	21	83	112	142	156	126	233	44	25	43	18	19	33	25	76	40	42	152	215	49
27.75	77	115	71	30	132	52	203	187	196	205	288	251	158	123	137	122	124	103	175	190	184	180	180	171	69	77	122	129	19	23	85	113	145	158	127	235	45	26	45	17	20	33	27	78	42	45	154	218	50
28	76	113	69	30	130	50	202	186	195	204	288	250	158	123	136	120	123	101	175	188	183	179	179	169	68	75	121	129	17	21	83	112	144	158	126	234	45	25	44	18	18	32	26	78	42	42	153	218	50
28.25	79	116	72	31	133	53	205	189	196	207	288	252	159	125	137	122	125	104	177	191	185	181	181	172	70	77	124	131	20	23	85	114	146	160	129	236	47	26	47	19	20	33	29	80	45	45	155	220	50
28.5	77	114	69	31	132	52	204	188	197	207	288	253	158	125	137	121	124	102	177	191	184	181	181	173	70	76	123	130	19	22	84	113	146	160	128	236	46	27	46	19	19	33	30	80	45	44	155	220	50
28.75	76	114	69	30	131	51	204	189	196	207	288	253	158	125	136	121	122	102	178	191	184	180	181	173	69	76	121	129	16	20	83	113	145	160	126	237	46	25	45	18	19	32	29	80	45	43	155	220	50
29	77	115	70	31	132	53	205	190	199	208	288	255	159	126	138	122	125	103	180	193	185	182	182	175	70	77	123	131	19	23	86	114	147	162	128	237	46	26	48	19	20	34	33	82	48	45	156	222	50
29.25	78	116	71	32	133	53	206	191	199	209	288	256	159	127	138	123	125	103	181	194	186	182	183	176	70	78	123	131	19	23	86	114	148	162	128	239	47	27	49	19	21	34	34	82	50	45	157	223	51
29.5	77	115	71	31	133	54	206	191	200	211	288	256	159	127	138	123	125	104	182	195	187	183	184	177	69	77	124	131	19	23	87	115	149	162	128	238	45	26	49	18	20	34	36	84	50	45	157	222	49
29.75	76	114	69	30	132	52	206	191	199	210	288	257	158	126	136	122	124	103	182	195	187	182	184	177	69	76	122	130	18	22	86	115	148	163	128	240	45	26	49	19	19	33	37	84	50	45	158	224	50
30	79	116	71	32	135	55	207	193	201	213	288	259	160	128	139	123	126	104	184	198	188	184	185	179	71	78	125	132	20	24	88	117	151	165	129	241	48	27	51	20	21	35	40	86	54	47	159	224	51
30.25	78	116	71	31	134	55	207	193	200	214	288	259	160	128	138	123	125	104	185	198	188	184	186	179	70	78	124	131	20	23	87	116	151	165	128	242	47	27	50	19	20	34	42	86	54	46	159	225	50
30.5	78	116	71	31	134	55	208	194	202	214	288	260	160	128	138	123	125	105	186	199	189	185	186	180	71	78	124	132	19	23	88	116	151	165	129	242	46	27	51	19	20	35	43	87	55	46	159	226	50
30.75	79	116	70	32	134	55	208	195	201	215	288	262	160	128	137	123	125	104	187	200	189	185	187	180	71	78	124	131	20	23	87	116	152	166	129	243	47	28	51	19	21	34	45	87	56	46	160	226	52
31	78	116	71	31	133	55	209	196	202	216	288	262	159	129	139	123	126	105	188	201	190	186	187	182	70	77	124	132	19	23	89	117	152	167	129	244	46	27	51	19	20	34	47	89	57	47	161	227	50
31.25	77	115	70	31	133	54	208	196	201	215	287	262	159	127	137	122	124	103	188	201	189	185	187	181	70	77	123	131	18	21	87	115	152	166	128	243	46	26	51	18	19	33	47	88	56	45	161	227	50
31.5	77	115	69	29	132	54	208	195	202	216	287	263	158	128	138	122	124	103	188	201	190	185	187	182	68	77	123	131	18	21	87	116	152	166	128	244	43	24	51	16	17	32	49	89	58	45	160	226	46
31.75	79	115	70	32	134	55	209	197	203	218	288	265	161	129	139	123	126	105	191	203	192	186	189	184	72	77	124	132	20	23	89	117	154	169	130	246	47	28	53	20	21	35	51	90	60	47	163	230	52
32	78	116	71	31	134	56	211	198	204	219	288	266	160	129	139	124	125	106	192	204	192	187	190	185	70	78	125	132	20	23	90	118	155	169	130	246	45	27	53	18	20	34	54	92	61	48	163	229	48
32.25	77	114	70	30	133	55	210	198	204	219	288	266	159	128	137	122	124	105	192	204	192	187	190	185	70	77	124	131	19	23	89	117	154	169	129	247	45	26	52	19	20	34	55	91	60	47	163	230	49
32.5	79	115	71	32	134	56	211	200	204	221	287	267	161	128	138	123	126	105	194	206	193	187	191	187	72	78	124	132	20	23	89	118	156	170	130	248	47	27	53	19	21	35	56	91	63	47	164	231	51
32.75	81	117	73	32	136	57	212	200	206	223	288	268	162	131	139	124	127	106	196	207	194	189	191	188	73	79	126	134	22	25	91	119	157	172	131	249	48	29	54	20	22	36	58	94	65	49	165	232	52
33	80	117	72	32	135	57	212	201	207	223	288	269	161	130	140	125	127	107	197	208	194	189	193	189	72	78	126	133	21	25	91	118	157	172	131	250	46	27	55	19	22	36	60	94	65	49	166	232	50
33.25	79	116	71	31	135	55	212	201	206	223	287	268	161	130	138	123	126	105	197	208	194	187	192	188	72	78	126	133	21	23	90	118	157	172	130	249	47	27	54	19	21	35	60	93	64	48	165	232	51
33.5	78	116	71	31	134	56	212	200	206	224	287	269	160	129	138	123	126	106	198	209	195	189	192	189	71	78	125	133	19	22	91	119	158	171	130	250	46	26	53	17	21	34	60	94	65	48	165	232	48
33.75	81	118	72	32	136	57	212	201	206	225	287	270	163	131	139	125	127	106	199	210	195	189	193	189	74	80	126	134	21	24	91	119	159	172	130	250	49	28	55	20	22	36	62	94	67	48	166	233	53
34	80	117	72	31	135	56	213	202	207	225	287	271	162	130	139	124	126	106	200	211	196	190	193	190	72	79	126	133	21	24	91	119	159	173	130	251	46	27	54	19	21	36	63	95	66	49	167	234	50
34.25	79	115	70	30	134	55	213	202	206	225	287	271	160	129	138	123	125	106	200	211	195	189	194	191	70	78	124	132	19	23	91	119	157	173	130	251	46	26	53	18	20	36	63	95	66	48	166	234	49
34.5	79	116	71	32	136	57	214	204	208	227	288	274	161	130	139	124	127	107	203	212	197	191	195	193	72	79	125	134	20	24	92	120	159	175	132	254	46	27	54	19	21	38	65	97	69	49	168	236	50
34.75	78	116	70	31	134	56	213	204	208	227	288	274	159	129	139	124	125	106	202	213	197	191	195	193	70	77	125	133	19	23	92	119	159	174	131	254	43	25	54	18	19	37	66	97	68	49	168	235	47
35	82	118	73	33	137	58	215	205	210	229	288	275	162	132	140	125	128	108	205	214	198	192	197	195	74	80	127	135	22	25	93	121	163	176	132	254	48	29	56	21	22	40	68	99	71	50	170	237	51
35.25	81	117	73	32	136	56	215	205	209	229	288	275	162	130	140	125	127	107	205	215	198	192	197	195	73	79	127	135	21	24	93	121	161	175	132	254	46	27	56	19	22	39	68	98	71	49	169	237	50
35.5	79	115	70	31	135	56	214	204	208	229	287	274	160	129	139	124	126	106	205	215	197	191	196	195	70	78	125	132	18	23	91	120	161	175	130	254	43	25	54	17	20	38	67	98	69	48	168	237	47
35.75	79	115	70	31	136	56	214	205	209	229	287	275	160	129	139	123	125	106	207	215	197	191	197	195	71	78	125	133	20	23	92	119	161	175	131	255	45	27	54	19	20	39	68	99	69	48	170	238	50
36	80	116	72	31	136	57	215	207	210	230	287	275	161	131	139	125	128	107	208	217	199	192	198	197	72	79	127	135	20	24	93	121	164	176	132	256	46	27	56	20	21	40	71	100	72	49	171	238	50
36.25	80	115	71	32	136	56	215	207	210	230	287	276	161	129	139	125	127	106	208	217	198	191	198	197	73	79	126	134	21	23	92	121	162	176	132	256	46	26	54	19	20	40	70	100	71	49	171	239	50
36.5	79	116	71	31	136	57	215	207	211	231	287	277	160	129	139	124	126	107	209	218	199	193	199	198	70	77	126	133	20	23	93	120	163	177	132	257	43	25	55	18	20	42	71	101	72	50	171	239	47
36.75	82	118	72	33	138	57	216	208	211	232	287	277	163	131	140	126	128	108	211	219	200	193	199	198	75	80	127	136	22	25	94	122	165	178	133	257	48	29	56	20	22	43	73	102	74	51	173	240	51
37	79	116	71	30	136	58	216	208	212	232	287	278	160	129	139	125	127	108	211	219	199	193	200	200	71	78	126	134	20	24	93	121	164	177	132	258	43	25	55	19	20	43	73	102	73	50	172	240	47
37.25	83	119	74	34	139	58	218	210	212	233	288	279	164	133	141	127	129	109	214	221	201	194	201	201	77	80	129	137	23	27	95	123	167	179	133	259	49	29	57	22	23	45	75	104	76	52	174	242	52
37.5	82	119	74	32	139	59	218	210	214	235	288	280	163	130	142	127	130	110	215	221	201	195	201	202	73	80	129	136	23	27	96	124	167	179	134	260	45	29	58	19	23	46	77	104	76	52	174	242	49
37.75	81	116	71	32	137	57	216	209	212	233	286	279	162	131	139	125	127	107	214	221	200	193	201	201	74	79	126	135	20	24	93	121	165	178	132	259	46	28	55	19	21	44	74	103	74	50	174	242	51
38	82	118	73	33	138	59	218	210	213	235	288	279	162	132	141	128	129	109	216	222	202	194	203	203	73	80	128	136	21	25	95	123	167	180	134	261	45	28	56	19	23	46	77	105	76	52	175	243	50
38.25	83	118	73	34	139	59	219	211	214	235	287	280	163	132	140	127	129	109	217	224	202	194	203	204	76	81	128	138	22	27	94	124	168	180	133	261	47	29	58	21	23	47	77	105	77	52	175	244	51
38.5	82	119	73	33	139	58	218	211	214	235	288	280	163	132	141	127	129	109	218	224	202	194	202	204	74	80	128	137	22	26	94	123	167	180	134	261	47	27	58	20	22	46	77	105	76	51	176	244	51
38.75	83	119	74	32	140	60	220	211	215	237	288	281	164	132	142	128	130	111	220	225	203	195	204	205	75	81	129	138	23	27	96	124	168	180	135	262	46	29	58	21	24	49	79	106	79	52	176	245	50
39	81	116	71	32	137	58	218	210	214	236	287	281	161	131	140	126	127	109	219	224	201	194	203	205	73	79	127	135	20	26	94	123	167	180	133	262	45	27	56	19	22	47	78	106	76	51	176	245	49
39.25	84	119	74	34	140	59	219	213	215	237	287	282	164	132	141	127	130	110	221	226	203	195	205	206	76	82	129	138	23	27	95	124	169	181	134	263	48	30	59	21	24	49	81	107	79	52	177	247	51
39.5	83	119	74	33	140	60	220	213	216	238	288	283	165	132	142	128	131	111	222	227	203	196	205	207	75	81	131	138	23	27	95	124	170	181	135	264	46	28	58	20	25	49	81	108	81	53	178	246	49
39.75	81	117	73	32	139	58	218	212	215	236	286	280	163	132	141	126	128	108	221	227	201	194	204	206	74	79	128	136	20	24	94	123	168	180	133	262	45	26	56	18	22	48	80	106	78	50	176	246	49
40	84	120	75	33	141	60	220	212	216	239	287	282	164	133	142	128	130	111	224	228	203	196	205	207	77	82	130	138	23	27	95	125	170	182	134	264	47	28	59	21	24	49	82	108	80	53	178	247	51
40.25	82	117	72	32	139	59	218	212	215	237	287	282	163	131	140	127	129	109	223	228	202	195	205	207	75	79	128	136	21	26	94	124	168	180	134	264	46	27	56	19	22	47	81	106	78	51	178	248	49
40.5	83	118	74	31	140	60	220	213	217	239	287	283	164	131	142	129	130	111	225	229	203	196	206	209	74	80	129	137	21	27	95	125	169	181	134	265	45	27	57	19	23	49	83	107	79	52	178	248	48
40.75	85	120	75	34	142	60	221	214	217	240	288	284	165	133	142	128	130	112	226	230	204	196	206	209	78	82	130	139	23	28	96	125	170	182	135	265	49	30	59	21	24	51	83	107	81	53	180	249	53
41	85	119	75	33	142	61	221	214	218	240	288	284	165	133	143	129	131	113	227	231	204	197	207	211	76	82	131	139	24	29	96	126	171	183	135	266	45	28	60	20	24	51	85	109	81	53	179	249	49
41.25	83	118	72	32	140	58	219	213	215	239	286	283	164	132	140	127	129	109	226	230	202	195	206	209	76	80	127	137	21	26	94	124	169	181	134	266	47	27	55	19	22	48	82	106	79	52	179	249	50
41.5	84	119	75	32	141	61	221	214	217	241	287	285	164	133	143	129	131	112	228	231	204	196	207	211	75	81	131	138	23	28	96	126	170	182	135	267	45	28	58	19	23	50	85	108	81	53	179	250	48
41.75	85	120	75	33	142	60	221	214	216	241	287	285	165	133	142	129	130	112	230	231	204	197	207	211	78	82	130	140	23	28	96	126	171	183	135	267	47	29	58	21	24	51	85	108	81	53	180	250	52
Data File	J:\Service\Customer\400\411\ShID_561\data\Assays\10138\crod_SIDx6450xICC169___4_37_138_209_Marx25x2013_A_02B.oka
Set up Time	Mar 25 2013 3:42 PM
Position	2-B
Plate Type	PM04-A
Strain Type	NOT APPLICABLE
Sample Number
Strain Name	Crod
Strain Number	SID_6450_ICC169
Other
Hour	A01	A02	A03	A04	A05	A06	A07	A08	A09	A10	A11	A12	B01	B02	B03	B04	B05	B06	B07	B08	B09	B10	B11	B12	C01	C02	C03	C04	C05	C06	C07	C08	C09	C10	C11	C12	D01	D02	D03	D04	D05	D06	D07	D08	D09	D10	D11	D12	E01
0	22	17	27	11	9	8	7	10	10	17	18	28	16	6	0	1	6	3	1	3	4	14	13	21	14	4	0	0	0	0	0	0	2	9	8	16	12	1	0	0	0	0	0	0	0	5	5	14	11
0.25	22	19	28	15	11	15	15	22	20	29	25	38	16	6	2	8	11	11	7	15	13	28	25	37	15	6	0	1	7	4	3	10	12	23	18	27	14	2	0	0	4	1	1	1	11	18	18	29	10
0.5	25	19	30	14	12	13	11	15	15	24	23	34	21	7	2	6	10	8	6	11	10	22	20	31	16	7	1	1	5	3	2	6	8	17	15	25	14	3	0	0	1	0	0	0	9	13	14	26	15
0.75	26	18	30	13	11	10	8	13	12	21	21	33	20	7	1	4	8	6	4	7	8	19	19	29	16	6	0	0	4	1	0	4	6	15	14	23	13	1	0	0	0	0	0	0	7	11	13	25	14
1	24	17	28	12	9	9	8	12	12	21	20	34	19	5	0	4	7	5	3	7	7	19	20	29	15	5	0	0	3	0	0	2	6	14	13	22	13	0	0	0	0	0	0	0	6	10	11	25	13
1.25	28	18	30	13	11	12	9	14	14	21	22	36	21	7	1	5	9	6	5	8	8	20	21	30	17	6	0	1	4	2	1	4	7	16	14	25	15	2	0	0	0	0	0	0	8	12	13	27	15
1.5	27	18	29	12	11	11	8	13	13	20	21	34	20	6	0	4	8	5	3	8	8	18	20	30	16	6	0	0	4	0	0	3	6	14	13	24	14	0	0	0	0	0	0	0	7	11	12	25	14
1.75	31	22	32	16	13	15	12	16	16	25	25	37	23	9	4	7	11	8	7	10	12	21	23	32	19	9	3	3	6	5	3	5	10	17	17	27	17	4	0	0	3	1	2	2	10	14	16	28	18
2	32	22	32	17	14	14	13	17	16	24	25	38	23	10	4	9	13	8	7	10	11	22	23	32	19	10	4	4	7	5	3	7	9	18	17	29	17	6	1	0	3	1	2	1	10	15	16	30	19
2.25	28	20	29	14	12	13	11	16	16	24	24	36	21	7	2	5	10	7	5	9	10	21	21	30	18	7	2	2	6	5	2	6	8	17	15	27	16	3	0	0	1	0	0	0	9	13	14	29	16
2.5	30	20	29	14	13	13	12	16	17	25	23	37	22	7	2	6	10	7	6	9	10	21	21	32	19	7	4	4	6	5	2	7	8	18	16	28	18	5	0	0	1	0	0	0	10	14	15	29	17
2.75	32	24	32	17	15	16	13	20	19	29	27	39	24	10	5	9	13	9	7	12	12	22	23	33	20	10	6	6	7	7	5	8	10	20	18	29	20	7	1	0	4	1	3	2	11	16	17	31	20
3	33	23	32	17	15	15	13	24	23	33	29	39	26	10	5	9	14	10	8	12	13	24	24	32	21	10	9	7	7	9	8	9	11	20	18	29	23	9	2	1	5	2	5	2	12	16	17	30	21
3.25	34	26	33	18	16	16	15	31	29	39	35	42	27	13	7	11	16	13	11	14	19	29	30	35	22	13	13	10	10	10	12	12	15	22	20	32	25	12	5	3	10	7	10	5	16	19	21	33	23
3.5	34	26	33	18	16	16	15	34	32	42	39	39	28	15	10	14	17	14	12	15	21	32	31	33	23	16	15	13	9	11	16	13	15	22	23	31	28	12	6	4	13	12	14	5	17	21	23	31	25
3.75	34	26	33	19	17	17	14	39	36	46	41	39	28	17	14	17	17	17	15	19	26	35	35	34	23	18	17	19	10	12	21	15	19	23	25	34	30	13	9	7	17	15	17	8	19	24	27	32	26
4	36	29	34	21	16	17	15	44	40	51	47	39	33	20	18	22	20	22	19	23	30	40	40	34	27	24	21	27	13	18	26	17	20	25	27	36	37	17	11	12	23	20	22	12	22	27	32	32	31
4.25	36	30	35	21	17	17	15	49	46	55	53	41	35	22	21	26	22	26	23	27	34	45	44	34	30	28	23	33	16	29	30	21	23	26	31	39	44	24	15	15	28	25	27	16	25	31	37	34	33
4.5	35	30	34	20	16	17	14	54	50	60	57	41	36	23	24	30	23	30	25	32	37	49	49	34	31	32	27	36	18	40	34	22	24	29	32	42	51	31	17	19	31	30	30	19	27	34	41	34	35
4.75	38	37	37	24	19	19	17	61	56	66	64	44	43	30	31	38	29	37	32	39	44	54	55	37	36	39	33	42	24	53	41	27	28	35	38	47	60	41	23	26	38	37	38	27	32	40	46	36	41
5	38	40	37	25	18	19	16	65	60	69	68	43	45	32	34	42	32	41	37	43	48	58	57	37	39	44	36	45	26	59	45	28	30	39	40	50	64	44	25	31	41	42	41	31	35	40	50	36	45
5.25	36	41	36	26	18	18	16	67	63	73	70	42	47	33	36	45	33	44	39	46	53	61	61	37	41	45	38	47	26	62	48	30	31	42	42	53	68	47	26	33	43	44	43	35	38	42	52	35	48
5.5	40	49	40	32	21	21	19	71	70	78	76	46	52	38	43	52	39	50	45	53	59	67	67	40	47	52	46	52	33	70	55	34	37	50	47	59	75	53	33	40	51	50	49	41	44	48	57	38	55
5.75	40	53	41	35	22	21	19	74	74	81	79	46	55	42	46	56	43	55	49	57	62	70	70	41	51	55	53	54	34	74	59	37	40	54	49	63	79	57	37	45	54	53	52	45	49	51	61	39	60
6	39	55	39	38	22	21	20	77	77	84	82	46	57	43	47	56	44	58	51	61	66	73	72	40	54	56	59	57	36	78	62	39	42	58	51	67	82	58	37	47	56	55	54	48	51	53	62	39	63
6.25	41	60	42	43	23	22	19	81	80	87	81	46	61	46	50	59	48	60	53	64	70	77	75	40	58	60	68	58	39	82	66	43	45	63	53	69	88	62	40	50	58	59	56	53	55	56	65	38	70
6.5	41	65	44	48	24	21	20	84	82	91	83	46	64	49	53	63	52	63	58	67	73	80	78	41	63	64	75	61	41	85	69	47	47	67	56	72	92	64	43	53	62	62	60	57	59	60	67	38	74
6.75	43	70	45	53	25	23	21	87	82	94	88	49	68	51	57	66	56	65	62	71	77	84	82	43	66	66	83	64	45	89	74	54	52	73	59	78	98	68	47	57	65	66	63	60	63	65	72	41	81
7	41	72	45	57	24	23	21	89	82	96	90	47	69	52	57	68	59	67	64	73	79	85	84	41	70	68	86	66	47	91	76	59	54	77	60	79	101	69	47	59	66	67	64	62	65	67	74	40	85
7.25	44	78	49	62	26	24	22	93	89	98	94	50	75	56	61	72	62	71	68	76	83	89	87	45	73	71	93	68	51	95	80	65	60	82	64	85	106	72	50	62	70	71	69	66	70	71	79	41	90
7.5	40	78	47	64	23	21	21	94	92	99	96	48	74	55	61	72	63	71	69	77	84	89	87	43	74	71	94	68	50	95	81	68	61	83	65	86	108	72	50	63	69	72	68	66	70	72	80	40	91
7.75	40	82	49	69	24	22	22	98	96	105	102	49	77	58	63	75	66	74	72	80	87	93	91	44	77	74	98	70	52	99	84	75	65	88	68	91	111	74	53	66	72	76	70	69	74	76	84	41	95
8	42	87	54	74	27	24	24	103	100	111	106	52	82	62	68	78	70	78	76	85	92	97	95	46	80	78	103	73	55	103	89	81	70	94	71	96	116	79	56	70	76	79	74	74	79	80	88	43	101
8.25	43	90	55	78	27	25	25	105	102	113	104	51	84	64	70	80	73	79	78	87	95	99	96	46	83	80	105	75	57	104	92	85	73	98	73	97	119	81	57	73	78	81	76	76	82	83	91	44	104
8.5	45	96	58	83	28	26	26	109	107	117	104	53	88	68	73	84	78	83	82	89	98	103	100	47	86	83	109	78	59	107	95	90	78	102	76	100	125	84	60	76	81	85	80	81	85	86	95	44	108
8.75	43	96	58	86	27	25	24	111	108	118	106	52	89	68	74	84	79	83	84	91	100	104	101	46	87	84	110	78	59	108	96	93	80	105	76	102	126	84	59	77	81	85	80	80	87	88	97	44	111
9	42	101	59	89	28	24	24	113	110	120	111	52	90	69	75	85	81	84	84	92	101	106	103	47	89	84	113	79	60	110	98	96	82	107	77	104	130	85	62	78	83	87	80	82	90	91	99	43	113
9.25	46	107	63	97	32	28	27	119	113	124	117	56	95	74	80	91	86	90	90	97	107	110	108	49	93	89	118	83	64	114	104	103	89	113	83	109	135	90	66	83	88	91	85	87	95	96	104	46	118
9.5	46	111	65	101	32	29	28	122	117	127	121	57	97	77	82	93	88	91	92	100	110	113	110	50	95	91	120	85	66	115	107	105	94	115	85	110	138	92	67	86	90	93	88	90	98	98	108	47	121
9.75	44	111	66	103	31	26	24	122	118	127	120	53	97	76	81	92	88	91	91	99	111	112	109	46	97	90	120	84	65	114	106	107	94	116	85	110	141	92	67	85	89	93	87	90	98	98	108	45	122
10	44	114	67	109	31	27	26	126	121	131	124	57	99	79	84	94	91	93	94	102	114	116	112	48	98	92	123	87	66	117	111	111	98	120	87	113	144	94	68	87	92	95	90	93	102	102	111	46	124
10.25	46	118	70	115	34	28	27	129	123	134	128	58	102	83	87	98	95	97	97	105	117	118	115	50	101	97	126	89	69	120	114	114	103	123	90	116	149	97	71	91	95	99	92	95	104	105	114	47	129
10.5	46	119	71	117	34	26	25	131	123	134	128	56	103	84	87	98	96	97	98	105	118	119	115	46	103	97	127	90	69	119	116	115	105	123	92	116	151	97	71	92	95	98	92	96	105	105	115	44	130
10.75	47	123	74	122	35	28	27	136	128	138	132	59	106	87	90	101	100	100	101	109	122	123	119	51	105	99	130	93	71	122	119	120	109	128	96	119	155	99	73	95	99	102	95	100	109	109	118	47	133
11	47	126	77	126	37	29	28	139	131	141	135	60	108	89	92	103	103	103	104	112	124	125	121	50	107	101	132	94	74	125	123	123	113	132	98	122	159	102	75	97	100	103	97	102	112	112	121	47	135
11.25	46	128	78	131	39	30	29	143	134	145	137	63	110	91	95	105	106	105	107	115	127	128	123	53	109	104	135	96	75	126	126	126	117	135	101	124	162	104	76	100	103	106	100	104	115	115	124	50	138
11.5	47	131	80	133	40	29	28	146	136	146	139	62	111	93	95	106	108	106	109	116	129	130	125	52	110	105	136	97	76	128	128	127	120	136	103	124	165	105	77	101	105	108	101	105	116	117	125	48	140
11.75	47	132	81	137	42	29	29	149	138	149	142	64	113	96	97	108	110	108	111	118	131	132	127	53	111	106	139	99	77	129	132	130	124	139	105	127	167	106	78	102	106	108	101	108	118	120	128	49	142
12	48	135	83	141	45	30	30	153	140	151	144	65	115	98	100	111	113	110	114	120	135	134	130	54	115	108	141	101	79	132	136	132	128	141	109	128	170	109	81	105	109	111	104	110	122	122	131	49	145
12.25	47	138	84	145	47	31	33	157	144	156	148	69	117	100	102	113	116	113	118	124	138	139	134	58	115	110	144	104	81	134	140	136	132	146	112	132	174	111	82	106	111	113	107	113	125	126	134	53	146
12.5	47	140	87	148	49	32	33	159	145	158	149	68	119	102	104	115	119	114	120	125	140	139	134	58	118	112	147	105	82	135	142	138	135	147	114	132	177	112	83	108	112	114	108	114	126	127	135	52	148
12.75	46	139	86	148	48	30	29	159	144	156	148	65	118	101	103	113	118	114	120	123	139	137	132	52	117	111	145	104	81	134	142	136	135	145	115	131	177	112	81	107	111	113	106	113	125	126	135	47	148
13	47	142	88	153	51	31	31	163	148	160	152	69	120	104	105	116	123	116	124	128	143	141	137	56	120	113	149	106	84	136	147	141	140	150	119	135	181	114	84	110	114	116	109	116	129	131	139	51	151
13.25	46	143	90	155	53	31	32	166	150	162	153	69	122	106	107	118	124	118	126	129	145	142	138	55	122	115	151	108	85	138	148	142	143	151	120	135	182	116	85	112	115	117	111	117	131	132	140	52	153
13.5	49	147	95	160	56	33	33	169	152	164	156	70	124	110	109	121	128	120	129	131	147	145	141	57	125	117	153	110	87	140	152	144	147	154	125	138	186	120	87	114	117	120	113	120	134	135	143	52	157
13.75	46	146	93	159	56	31	30	170	150	164	155	67	125	107	108	120	127	119	130	131	148	144	140	54	123	116	152	109	86	139	153	144	147	153	125	136	186	117	86	113	117	119	112	119	133	134	143	50	155
14	44	148	95	164	57	31	32	173	154	169	158	72	125	109	110	121	131	122	133	134	150	148	144	57	124	117	154	111	88	141	157	146	151	157	128	139	189	119	88	116	118	121	113	121	135	137	145	52	156
14.25	48	151	97	166	59	33	33	176	156	171	159	72	129	114	113	125	134	123	135	136	152	149	144	58	128	121	157	114	90	143	160	148	154	158	131	140	192	122	89	118	121	123	116	124	138	140	147	52	161
14.5	46	150	97	167	59	31	31	177	156	171	160	70	128	113	112	125	134	123	135	136	153	149	143	55	128	120	156	114	89	143	161	148	155	159	132	141	192	121	88	118	120	123	116	124	137	140	148	50	160
14.75	47	153	98	170	62	33	33	180	158	173	162	72	132	117	115	126	138	125	140	139	156	151	147	56	130	122	158	115	91	145	165	151	160	161	136	142	194	124	91	120	123	125	119	126	140	142	151	51	164
15	48	154	100	173	65	32	32	182	159	175	164	72	132	119	116	128	140	127	141	140	157	152	147	56	132	123	159	117	92	146	167	152	162	162	138	143	197	125	91	122	124	126	119	127	142	144	152	52	166
15.25	47	154	99	173	66	32	32	183	160	175	164	72	132	119	116	128	140	127	142	140	157	152	147	54	132	123	160	117	92	145	169	153	163	162	140	143	198	125	91	122	124	127	120	127	142	144	153	50	166
15.5	49	158	102	177	68	33	32	186	162	178	166	74	135	124	118	131	144	129	145	142	160	154	150	56	135	126	162	119	94	148	172	154	166	164	143	145	201	128	94	125	126	129	122	130	144	146	155	51	169
15.75	50	159	103	179	70	34	33	189	163	180	167	74	137	125	121	133	146	131	147	144	162	156	152	56	137	128	163	121	95	150	175	156	168	165	146	146	203	129	94	126	128	130	124	131	146	148	157	51	171
16	49	160	104	182	71	34	34	191	165	182	170	76	138	127	121	135	149	132	150	146	164	158	154	58	138	129	165	122	97	151	177	158	170	168	148	148	205	130	96	128	129	131	125	132	148	150	159	53	172
16.25	48	159	104	181	71	33	32	192	165	182	170	75	138	126	121	133	150	132	149	146	163	157	153	54	138	128	164	122	96	150	177	158	171	168	149	147	205	130	95	127	128	132	124	132	148	149	159	49	173
16.5	49	161	106	184	73	34	32	194	167	184	171	76	140	130	124	135	152	134	152	148	166	159	155	55	141	130	166	124	97	153	180	159	173	169	152	148	207	132	97	129	130	134	126	134	150	151	160	51	175
16.75	50	165	109	188	75	35	34	198	170	188	175	80	143	133	126	139	156	136	156	150	169	162	158	59	142	133	168	127	100	156	184	162	176	172	156	151	210	135	99	132	133	135	129	137	153	155	164	54	177
17	49	165	108	189	76	34	35	198	170	189	176	79	143	132	125	138	158	136	156	152	169	163	158	58	143	132	168	127	100	156	186	163	177	173	157	152	210	134	98	132	133	136	129	136	153	155	164	53	176
17.25	52	167	112	192	79	36	36	201	172	191	177	80	145	136	128	141	160	138	158	153	172	164	159	58	146	135	170	129	102	157	188	165	179	174	159	153	213	137	101	134	135	138	131	139	154	157	166	53	180
17.5	52	168	114	193	80	35	35	203	173	192	178	81	147	137	129	142	163	140	159	155	173	166	161	58	148	136	171	130	103	159	190	166	181	175	161	154	215	138	101	136	136	139	132	140	157	158	167	53	181
17.75	49	167	112	193	79	33	33	202	173	192	178	80	147	137	129	141	163	139	160	155	172	165	161	56	147	134	171	129	102	158	191	166	181	175	161	153	214	137	100	135	135	138	131	139	156	158	167	52	180
18	51	170	116	197	82	36	35	206	175	195	181	83	150	141	132	145	166	142	162	157	175	168	162	57	150	138	172	132	105	161	194	168	184	176	165	156	217	141	103	138	138	141	135	142	158	161	169	53	184
18.25	52	171	117	198	84	36	35	208	177	196	182	84	151	143	133	145	169	143	164	159	176	168	164	58	152	139	174	133	106	162	197	169	186	178	166	156	218	142	104	139	139	142	135	144	160	161	170	53	185
18.5	52	173	118	200	85	36	35	210	178	198	184	85	153	144	135	147	171	144	166	159	178	170	165	59	153	140	175	134	106	163	198	170	187	179	169	158	220	143	105	141	140	143	136	144	161	163	171	54	186
18.75	50	172	117	200	84	35	34	210	177	198	184	85	152	143	133	147	171	144	166	161	178	170	165	57	154	140	174	134	106	163	199	171	187	179	169	158	219	142	104	140	139	143	137	143	161	163	172	53	186
19	54	175	122	202	87	36	35	212	179	200	185	86	155	148	136	149	174	146	167	162	179	170	166	57	158	143	176	136	109	165	200	171	189	179	172	158	223	145	106	142	141	146	138	146	163	164	173	53	189
19.25	51	175	121	203	86	35	34	213	179	201	185	86	156	148	136	149	175	146	168	162	180	171	166	56	157	143	176	136	108	165	202	172	190	180	171	159	222	145	106	143	142	147	139	146	163	164	174	52	189
19.5	52	177	123	205	87	36	35	214	181	202	187	87	158	150	138	151	178	148	169	164	181	172	168	56	160	145	178	138	110	166	204	173	191	181	173	159	225	146	107	144	143	147	139	147	164	166	174	52	191
19.75	51	178	125	207	89	36	35	217	182	204	188	90	158	152	139	152	179	149	171	165	183	173	169	58	161	145	178	139	110	168	206	174	192	182	175	161	225	147	107	145	143	148	141	148	165	167	176	53	192
20	51	178	125	207	89	35	35	217	183	204	189	90	159	152	139	152	181	149	172	166	183	173	169	56	161	145	179	139	111	168	207	175	194	183	176	162	225	148	108	146	144	148	141	148	166	168	176	52	192
20.25	53	180	127	210	91	37	35	219	185	206	191	91	161	156	142	155	184	152	174	168	185	176	171	57	163	148	181	141	113	170	210	176	196	184	178	163	227	150	110	148	147	151	143	151	168	170	178	54	195
20.5	53	182	129	212	93	37	36	221	186	207	192	92	163	157	143	156	186	153	176	168	187	177	173	58	166	149	182	143	114	172	211	178	197	185	180	165	229	152	111	150	148	152	144	152	170	171	179	54	196
20.75	50	181	127	211	91	35	34	220	186	207	192	92	162	155	142	155	187	152	176	169	187	177	172	56	164	147	181	142	113	170	212	177	197	185	180	163	228	150	110	148	146	152	144	151	170	170	179	53	195
21	52	183	130	213	94	37	36	223	188	210	195	96	164	159	144	157	189	154	178	171	189	179	174	59	167	150	183	144	114	173	213	179	199	187	183	167	229	152	113	151	149	154	146	153	172	173	182	54	198
21.25	52	183	131	214	96	36	35	223	188	210	195	96	165	160	145	158	191	156	178	170	190	179	174	57	168	150	183	145	115	173	215	179	199	187	184	166	231	153	113	151	149	154	146	153	172	173	181	54	199
21.5	51	185	132	216	96	36	35	225	189	211	196	97	166	161	145	159	192	156	179	173	191	180	176	58	169	152	185	146	116	175	216	180	200	188	185	167	231	154	113	152	151	155	147	154	172	174	182	54	200
21.75	52	185	133	216	99	37	36	226	190	212	197	99	167	162	147	161	195	158	181	174	192	181	176	57	171	153	185	147	117	175	218	181	201	189	186	168	232	155	114	155	152	157	149	155	174	175	184	54	201
22	54	189	136	220	101	38	37	228	192	214	199	101	170	167	150	164	198	161	183	176	194	183	179	59	173	155	188	150	119	177	220	183	204	191	188	170	235	158	117	157	155	159	150	158	176	177	185	55	204
22.25	52	189	136	219	100	36	36	228	192	215	199	101	169	167	150	163	198	160	183	175	193	182	178	58	173	155	188	150	119	177	221	183	203	191	188	169	235	157	115	157	154	158	150	156	176	176	185	54	204
22.5	52	190	136	221	103	38	37	230	195	216	201	104	171	167	151	164	200	162	186	178	196	184	180	60	174	157	188	151	120	179	223	185	206	192	191	172	235	159	117	158	156	160	153	159	178	178	187	56	205
22.75	51	190	136	222	103	36	36	231	195	216	201	105	171	168	151	165	202	162	186	177	196	184	180	58	174	156	189	152	120	179	224	185	206	192	190	171	235	159	118	157	156	160	152	159	178	178	187	54	205
23	54	194	139	224	106	38	38	232	197	219	203	108	174	171	153	168	205	164	188	180	197	186	182	61	178	159	191	154	122	182	226	187	208	194	193	174	238	162	120	161	159	163	154	162	179	180	189	56	208
23.25	50	192	139	224	106	37	36	233	197	219	204	108	173	170	153	168	205	164	189	181	198	187	182	60	177	158	191	154	123	181	226	187	208	195	193	174	237	161	119	161	159	163	154	161	180	180	190	55	207
23.5	53	194	141	226	108	38	38	235	199	221	205	111	176	173	155	169	208	167	191	183	200	188	184	61	179	160	192	156	125	183	227	189	210	196	195	176	238	163	121	163	161	165	156	164	181	181	191	56	209
23.75	53	195	142	226	108	38	37	235	199	221	205	112	177	174	156	170	209	166	192	182	201	187	184	60	180	161	193	157	124	184	228	189	210	195	195	176	239	163	121	163	161	165	157	164	182	182	191	56	210
24	51	195	142	227	109	38	37	236	200	222	207	113	177	175	156	170	210	169	193	184	202	190	186	60	181	162	193	158	125	185	229	191	211	196	196	177	239	164	122	165	162	166	158	164	183	183	192	55	212
24.25	53	197	143	229	111	39	38	238	201	223	208	116	179	177	158	173	213	170	195	185	203	191	187	61	183	163	195	159	127	186	231	191	213	198	198	179	241	166	123	167	164	168	159	166	185	184	194	57	213
24.5	52	198	145	230	111	37	38	239	202	224	209	117	180	178	158	173	215	170	195	186	203	191	188	61	184	163	195	159	127	187	231	192	213	199	198	179	241	167	123	167	165	169	160	167	184	185	194	56	213
24.75	54	200	147	231	113	39	38	239	204	225	210	119	181	180	159	174	216	172	196	187	205	192	188	61	185	165	196	161	129	189	233	193	214	199	200	180	242	168	125	169	166	171	162	168	186	186	195	56	215
25	53	201	148	232	114	39	39	240	203	226	211	121	182	181	160	175	218	173	198	188	205	193	189	61	186	166	197	162	130	189	234	194	215	200	200	180	243	169	126	169	168	172	163	169	187	186	196	56	216
25.25	53	201	150	233	115	39	38	241	205	227	212	123	183	182	161	176	220	174	199	189	206	194	190	62	187	167	198	163	130	191	235	195	216	201	202	182	243	170	127	171	168	173	165	169	187	187	197	57	217
25.5	55	203	153	234	116	38	37	242	205	227	213	123	185	185	163	178	221	176	200	190	206	193	190	60	189	168	198	164	131	191	236	195	216	200	202	181	245	171	129	172	170	174	165	171	188	188	197	55	219
25.75	55	204	156	234	118	39	38	243	206	228	213	125	185	187	164	178	223	176	201	191	207	194	192	60	190	169	199	166	132	192	236	196	216	201	202	182	245	172	129	173	170	175	166	171	189	188	197	56	220
26	53	205	157	236	121	39	39	244	208	229	215	128	186	186	165	179	225	177	202	193	209	197	193	61	191	169	200	166	133	193	237	197	218	203	204	184	246	172	130	173	171	175	167	171	189	190	199	56	220
26.25	55	206	160	237	126	40	39	246	209	231	215	130	188	188	166	180	226	178	203	193	210	197	194	62	192	170	201	167	134	194	238	198	219	203	205	185	246	174	130	175	173	177	168	173	191	190	199	57	221
26.5	53	207	163	238	128	40	39	246	210	230	217	132	188	187	167	180	228	179	205	196	210	198	195	63	192	171	202	168	135	196	239	199	220	205	205	186	246	174	132	175	174	177	169	173	191	191	200	58	221
26.75	54	208	165	239	130	39	39	248	210	232	217	134	189	190	168	182	229	181	206	196	212	199	195	62	193	172	202	169	136	197	240	200	220	205	206	188	247	176	132	176	175	179	171	174	192	192	201	57	223
27	51	205	164	236	129	38	36	246	209	231	216	134	189	187	166	179	228	181	205	194	210	198	195	59	192	170	201	167	134	194	238	198	219	203	206	185	246	174	130	176	172	178	169	173	191	190	200	55	221
27.25	52	206	165	236	131	38	36	246	209	231	216	135	190	188	166	180	228	181	205	195	210	198	195	58	194	171	202	167	135	195	239	199	220	203	206	186	246	174	131	177	175	179	170	173	191	191	201	53	221
27.5	55	210	170	240	136	41	38	249	212	234	219	139	193	192	170	184	231	183	208	198	213	201	197	61	197	174	204	171	138	199	241	201	222	205	208	188	248	178	135	179	177	181	174	175	194	193	203	56	225
27.75	53	210	171	240	137	40	39	250	213	234	219	141	193	191	169	184	233	184	209	199	214	202	197	61	196	174	204	171	138	199	242	202	222	207	209	189	248	178	134	180	177	182	174	176	195	194	203	56	224
28	54	211	173	242	141	39	38	251	213	236	220	142	193	195	171	186	234	185	210	199	214	201	198	60	198	176	205	172	139	200	242	202	223	206	209	189	249	179	136	180	179	183	174	177	195	195	204	55	226
28.25	52	211	173	241	141	38	36	250	212	235	220	143	193	194	171	186	234	185	209	199	214	200	198	59	199	175	205	173	140	199	241	202	222	206	209	188	249	179	135	181	178	183	174	176	194	194	203	54	226
28.5	54	213	177	244	145	39	39	253	216	238	222	147	195	196	173	188	237	188	212	202	216	204	202	63	200	177	207	176	142	202	243	205	225	209	212	192	250	181	137	183	181	185	176	179	197	196	205	57	228
28.75	53	211	176	243	146	39	38	252	215	237	222	148	195	196	173	188	237	187	212	202	216	204	201	60	200	177	207	175	142	202	243	204	224	208	211	192	249	181	137	185	181	185	177	179	197	197	205	56	227
29	53	212	176	242	147	38	36	252	214	236	222	148	195	196	173	187	237	188	212	202	216	203	201	59	201	177	206	174	141	201	242	204	224	207	211	192	249	181	136	184	181	185	177	178	197	196	205	54	228
29.25	55	216	180	245	151	40	39	254	217	239	224	152	197	200	176	190	240	190	214	204	218	206	203	61	203	180	209	177	144	205	245	206	226	210	213	195	251	184	139	186	183	187	179	181	200	199	208	57	230
29.5	54	215	180	245	151	39	37	253	216	239	223	153	197	200	176	190	240	190	214	204	218	205	203	59	203	180	208	177	143	205	244	206	226	210	213	194	250	183	138	186	183	187	179	180	199	198	207	56	230
29.75	53	215	181	245	152	38	37	254	217	241	224	155	198	198	176	190	241	191	216	205	219	207	204	60	203	179	209	177	145	205	245	206	226	211	214	195	250	184	139	186	184	188	180	181	200	198	208	55	230
30	56	218	184	248	156	40	39	256	220	242	226	158	200	203	179	193	244	193	218	207	221	208	206	62	206	183	211	180	147	208	247	209	228	212	215	197	253	187	142	189	187	191	183	183	202	201	209	57	233
30.25	56	218	186	249	158	40	39	256	220	243	227	160	200	204	180	194	245	194	219	208	221	209	207	63	207	184	212	181	148	208	247	209	228	212	217	198	253	188	143	190	188	191	184	184	203	201	210	57	234
30.5	53	217	185	247	158	38	37	256	220	242	227	161	199	201	178	193	244	194	218	208	220	208	206	61	206	182	211	180	147	208	246	209	228	212	216	198	251	187	141	189	187	192	182	183	201	200	209	56	232
30.75	56	221	188	251	161	41	40	258	222	245	229	163	203	205	182	196	247	197	221	210	223	211	209	62	209	185	213	184	150	211	248	211	230	214	218	200	254	191	144	192	190	194	185	185	204	202	211	57	236
31	52	220	188	251	161	37	37	257	222	245	228	165	202	202	181	195	248	197	221	210	223	211	209	62	208	183	212	183	149	210	248	211	229	214	217	199	253	189	144	191	189	193	184	184	203	201	211	55	234
31.25	55	223	192	253	164	41	40	260	224	248	231	168	204	207	184	199	251	200	224	213	225	213	210	65	211	187	215	185	152	213	250	213	231	216	219	202	255	193	147	194	192	196	187	187	206	204	213	58	237
31.5	53	221	191	252	163	38	36	259	222	246	229	166	203	206	183	197	250	199	222	211	223	210	208	60	210	185	214	186	151	212	248	211	229	213	218	200	255	192	145	193	190	194	185	185	204	202	211	53	237
31.75	52	224	194	255	166	40	40	261	226	249	232	171	205	207	185	199	253	201	226	215	226	216	213	66	210	187	217	187	154	215	251	215	233	218	220	204	255	194	148	195	193	198	188	188	207	205	214	57	237
32	54	226	196	257	168	41	41	261	226	250	233	173	207	210	187	201	255	203	226	216	227	215	214	64	213	190	218	189	155	217	252	216	233	218	221	204	257	197	150	196	196	199	189	189	208	206	214	57	240
32.25	53	225	196	257	169	39	40	262	227	251	233	173	207	209	187	201	255	203	227	216	227	216	214	65	214	190	218	189	156	217	251	216	233	218	222	204	256	196	150	197	195	200	190	189	208	206	214	58	239
32.5	54	227	198	258	171	41	40	262	227	251	234	175	208	211	189	203	256	204	227	218	228	217	215	64	215	191	219	191	157	218	252	216	234	219	223	205	257	198	152	199	197	201	191	190	208	207	215	57	242
32.75	54	227	198	257	172	39	40	262	228	252	234	176	208	211	189	202	256	204	228	218	229	217	215	65	215	191	219	190	158	218	252	217	234	219	223	206	256	198	151	199	197	201	191	190	209	207	216	58	240
33	55	227	200	257	175	40	40	262	228	252	235	177	209	212	189	204	257	206	228	218	229	217	216	64	216	191	219	191	158	219	252	217	235	219	223	206	257	199	151	200	198	202	192	191	209	208	216	57	241
33.25	52	226	199	256	176	39	37	262	228	252	235	179	208	209	189	203	257	205	228	219	228	217	216	64	214	190	218	190	158	218	251	217	234	219	223	207	254	197	150	199	197	202	193	190	210	207	216	57	240
33.5	55	229	202	259	181	41	40	263	229	253	236	180	211	215	192	206	259	208	230	220	230	218	217	64	218	194	221	194	161	221	253	219	236	220	224	208	258	202	154	202	200	204	194	193	211	209	217	57	244
33.75	52	228	202	258	181	39	38	263	230	254	236	181	209	211	190	205	259	208	230	221	230	220	218	64	216	192	220	192	160	220	252	219	235	221	224	209	256	200	153	201	200	204	194	192	211	209	218	57	241
34	55	230	203	259	183	41	40	264	231	255	237	183	212	215	192	207	260	209	231	222	231	219	218	64	218	195	221	195	162	223	252	220	236	221	225	209	257	202	155	203	202	205	196	194	212	210	219	57	244
34.25	56	231	206	261	184	42	40	264	231	256	238	185	213	216	194	208	261	211	232	223	232	220	219	63	220	196	223	196	164	224	254	221	237	222	226	211	258	204	157	204	203	207	197	195	213	211	220	59	245
34.5	52	229	204	259	184	40	38	264	231	255	238	185	211	213	192	206	261	210	232	223	232	221	220	63	219	194	221	194	162	223	253	221	237	222	226	212	255	201	154	203	203	206	198	194	213	211	220	57	242
34.75	57	231	206	260	186	41	40	265	232	256	239	187	214	217	195	209	261	212	233	225	233	221	220	64	221	197	223	196	165	224	254	222	238	222	227	212	257	204	157	206	204	208	199	196	214	212	222	58	245
35	57	230	206	259	186	42	39	264	231	255	239	187	214	218	195	209	261	212	232	224	233	220	221	62	222	198	223	197	164	224	253	222	237	221	227	211	257	205	158	206	204	208	199	196	214	212	221	57	245
35.25	56	232	208	261	187	41	39	265	233	257	241	189	214	217	196	210	263	213	234	226	234	222	221	64	222	199	224	198	166	226	255	223	239	223	228	213	257	206	158	208	205	209	201	197	215	213	221	57	247
35.5	54	229	207	259	186	41	38	264	232	257	240	190	214	215	195	209	261	214	233	226	233	222	221	61	221	197	224	197	165	225	253	223	238	223	228	213	255	204	158	207	205	209	201	196	214	212	223	56	245
35.75	57	233	210	261	188	42	40	265	234	258	241	192	216	219	198	212	264	215	235	227	235	223	223	63	224	200	226	200	167	227	254	224	240	224	229	214	258	208	161	210	207	211	203	199	216	214	223	58	248
36	55	233	210	261	187	40	39	265	234	258	241	192	215	219	197	212	264	215	235	227	234	223	223	62	223	200	225	200	167	227	254	223	239	223	228	213	257	208	160	209	207	211	202	197	215	213	222	57	247
36.25	56	237	213	264	190	42	40	267	236	261	243	195	217	221	200	214	267	218	238	229	236	225	225	65	225	202	227	203	170	229	256	226	241	226	230	216	259	210	163	211	209	214	205	200	218	215	225	58	250
36.5	56	238	216	267	191	41	41	268	240	264	246	197	218	221	203	215	269	220	241	231	239	229	227	69	226	203	229	205	172	232	258	227	243	228	232	218	260	212	164	212	211	215	206	201	219	216	225	60	249
36.75	55	238	216	266	191	42	41	267	238	262	244	197	219	223	202	217	269	219	239	230	238	226	226	65	226	204	229	205	172	231	256	227	242	226	231	216	261	214	165	213	212	215	206	200	219	217	225	57	251
37	53	238	216	266	191	41	41	268	239	264	246	198	218	220	202	216	269	220	241	232	239	228	227	66	226	203	229	205	173	232	257	227	242	228	231	218	259	212	164	212	211	215	207	201	219	217	225	58	249
37.25	54	240	219	268	194	42	42	269	242	266	247	201	219	223	205	218	272	223	243	233	241	230	229	68	227	206	231	207	175	234	259	230	244	229	233	220	261	215	166	214	213	217	208	203	221	218	227	60	251
37.5	52	238	217	266	192	39	38	268	240	264	246	200	218	222	202	217	269	221	240	232	239	228	228	65	226	204	229	206	174	232	256	229	243	227	231	218	259	213	164	213	212	216	207	201	219	217	226	57	250
37.75	56	240	220	268	194	42	40	268	240	264	247	202	220	225	205	219	271	223	242	233	240	228	228	64	229	207	231	208	175	234	257	229	243	227	232	218	261	216	167	216	214	218	209	203	221	219	227	57	254
38	54	240	221	269	195	41	41	270	243	267	249	205	220	224	205	219	272	224	244	235	241	232	231	68	228	207	231	209	176	235	259	231	244	231	234	221	260	216	167	216	215	219	211	204	222	220	228	60	251
38.25	53	239	219	266	193	40	39	268	241	265	247	204	220	222	204	218	270	224	242	234	240	230	229	65	228	206	231	207	175	235	256	230	243	229	232	220	259	214	166	215	214	218	210	203	221	219	228	58	251
38.5	52	240	220	267	194	39	38	269	241	266	247	205	220	222	205	219	271	224	243	235	241	230	229	65	228	206	231	208	176	235	257	230	244	229	233	221	259	216	167	217	215	219	211	203	221	219	228	57	251
38.75	53	240	221	267	194	40	39	269	242	267	249	206	221	223	205	219	272	225	244	236	242	231	230	66	229	207	231	209	177	235	257	232	245	230	234	222	258	216	167	217	217	220	211	203	222	220	229	59	251
39	57	243	224	269	196	41	41	269	243	267	249	207	223	227	208	222	274	227	245	237	243	231	231	66	231	210	234	212	179	237	258	232	245	229	234	221	261	219	170	220	219	222	213	205	223	221	230	59	256
39.25	55	242	224	269	196	41	41	270	244	269	250	208	222	226	208	223	274	227	246	238	244	233	232	67	231	210	233	212	179	238	258	233	246	232	235	223	260	219	170	219	219	222	214	206	224	222	230	58	254
39.5	53	241	223	267	195	40	38	268	242	266	249	208	221	225	207	221	272	226	243	237	242	230	230	62	230	209	232	210	178	236	256	231	244	229	234	220	259	218	169	219	218	222	213	205	223	220	230	57	254
39.75	56	245	227	271	198	42	42	271	245	270	251	211	223	228	210	224	275	229	247	239	244	233	233	67	231	212	235	213	181	239	259	234	247	232	236	224	261	221	172	222	221	225	215	207	226	223	232	60	256
40	55	244	226	269	197	42	40	269	244	268	251	211	223	227	209	224	274	229	246	239	244	232	232	65	231	212	234	213	181	239	258	234	246	231	236	223	260	220	171	222	221	224	215	207	225	223	232	58	255
40.25	56	246	228	272	200	42	42	271	247	271	253	214	224	229	211	225	276	230	249	241	246	236	235	69	233	214	236	216	183	241	260	236	248	234	238	225	261	222	174	223	222	226	217	208	227	224	232	60	257
40.5	54	245	228	270	198	41	39	270	245	269	252	213	224	229	210	225	275	231	248	239	245	233	232	64	233	214	236	214	182	240	259	234	246	231	237	222	260	222	173	222	221	226	217	208	226	222	231	58	257
40.75	55	247	230	272	201	41	42	272	249	273	255	216	225	228	212	226	277	232	250	243	247	238	237	70	232	215	237	217	184	242	261	237	249	236	238	227	261	223	174	224	224	228	219	210	228	225	234	62	256
41	55	247	230	272	201	43	41	272	247	271	254	216	224	229	213	227	277	232	250	243	247	237	235	67	233	216	238	217	184	243	260	236	249	234	238	226	261	224	175	225	224	228	220	209	228	225	234	60	257
41.25	56	247	232	273	202	41	41	271	248	272	255	217	225	231	212	228	278	232	251	242	247	237	236	68	234	216	238	218	185	243	260	236	248	234	238	225	261	224	176	225	225	229	220	210	228	225	234	60	258
41.5	55	246	230	271	200	41	40	271	247	271	254	217	224	228	212	227	276	232	250	243	247	236	235	67	233	216	237	216	185	243	259	237	248	234	238	225	260	223	174	225	225	228	220	210	228	226	235	59	257
41.75	56	249	233	274	203	42	43	273	249	274	257	219	226	232	214	229	279	234	253	244	248	239	238	69	234	218	238	219	187	246	262	238	251	236	240	227	262	226	177	227	226	230	222	212	230	227	235	61	259
Data File	J:\Service\Customer\400\411\ShID_561\data\Assays\10144\crod_SIDx6450xICC169___4_37_144_209_Marx27x2013_A_02B.oka
Set up Time	Mar 27 2013 5:31 PM
Position	2-B
Plate Type	PM04-A
Strain Type	NOT APPLICABLE
Sample Number
Strain Name	Crod
Strain Number	SID_6450_ICC169
Other
Hour	A01	A02	A03	A04	A05	A06	A07	A08	A09	A10	A11	A12	B01	B02	B03	B04	B05	B06	B07	B08	B09	B10	B11	B12	C01	C02	C03	C04	C05	C06	C07	C08	C09	C10	C11	C12	D01	D02	D03	D04	D05	D06	D07	D08	D09	D10	D11	D12	E01
0	28	20	32	14	11	11	14	14	15	20	22	30	24	9	2	7	8	5	4	6	9	16	18	26	18	8	0	1	4	1	1	1	6	13	12	18	15	3	0	0	1	0	0	0	4	11	8	19	15
0.25	23	18	28	13	11	14	17	19	19	28	25	34	16	7	2	6	9	8	6	12	11	23	22	30	15	6	0	0	6	2	3	9	11	20	17	26	13	3	0	0	2	1	3	1	12	16	16	28	12
0.5	25	19	30	15	14	19	18	24	21	35	26	39	19	9	3	7	11	13	10	17	17	30	24	33	18	7	1	1	8	4	8	16	17	25	21	30	14	4	1	0	6	3	9	7	18	19	22	35	14
0.75	27	18	30	13	12	12	13	16	15	25	24	33	19	10	3	5	9	7	5	9	10	20	20	29	15	7	0	0	5	1	2	6	9	18	15	25	13	2	0	0	0	0	2	0	10	12	14	26	15
1	29	20	31	13	13	13	13	16	16	24	24	34	21	11	3	5	9	6	6	9	10	20	22	30	18	7	1	0	4	1	3	6	8	17	15	25	15	4	0	0	1	0	2	0	9	13	15	27	16
1.25	28	19	31	13	12	13	14	17	16	26	25	36	20	10	2	5	9	6	6	9	10	21	22	31	17	6	0	0	5	2	3	8	10	19	16	27	14	3	0	0	0	0	2	1	11	14	15	28	15
1.5	28	20	31	15	13	15	16	20	18	30	26	36	20	10	3	6	11	8	9	14	12	25	23	31	18	8	2	1	6	3	5	10	12	22	18	29	15	5	1	0	3	1	5	2	13	15	17	31	17
1.75	31	22	33	16	14	16	16	20	20	30	27	40	22	11	5	9	11	9	9	13	14	26	25	33	19	9	3	3	7	6	6	10	12	22	19	29	17	5	2	0	4	2	5	4	13	17	18	32	18
2	28	22	32	18	16	22	21	27	26	39	33	46	20	11	6	10	14	16	14	21	20	34	31	39	20	9	4	6	11	9	12	19	21	30	24	36	19	7	4	1	10	7	12	10	22	23	28	42	18
2.25	30	21	32	15	13	15	15	19	20	29	28	39	21	11	4	8	11	8	8	12	13	25	24	34	18	9	3	3	6	5	5	9	12	22	18	29	17	6	0	0	3	2	4	2	13	16	17	32	19
2.5	31	22	32	17	14	15	17	21	21	31	30	40	21	12	5	9	13	9	8	13	13	26	25	34	20	9	5	5	7	7	6	11	12	22	19	30	20	8	1	0	4	3	5	4	14	17	18	33	19
2.75	33	25	35	18	16	18	18	24	23	37	32	42	23	14	7	10	14	11	11	13	16	27	28	35	22	11	8	8	9	9	8	12	14	24	21	32	24	11	4	2	7	5	7	6	15	19	21	34	22
3	35	26	36	18	16	17	19	29	27	41	36	41	25	15	8	12	16	11	12	13	18	30	30	35	23	12	13	9	9	11	11	13	16	25	22	33	27	12	5	3	7	5	10	6	17	20	20	34	24
3.25	31	23	33	17	15	17	17	33	30	45	38	41	24	14	7	12	15	12	11	15	22	33	32	34	21	11	13	8	7	9	14	16	17	24	22	32	30	11	6	2	9	8	12	5	19	21	22	33	24
3.5	33	25	33	19	16	18	19	39	34	49	42	42	28	19	12	18	19	17	17	19	27	38	40	36	24	16	17	16	10	12	19	19	22	26	26	34	38	14	11	6	15	15	18	9	24	27	27	35	29
3.75	36	30	36	21	17	19	20	44	37	53	46	44	32	24	19	24	25	23	23	26	34	45	46	38	28	23	22	28	15	17	26	24	26	29	31	38	48	21	17	13	22	21	24	15	29	32	33	36	37
4	37	32	37	22	19	20	21	46	39	56	49	44	35	28	25	28	27	28	27	33	39	50	51	39	31	28	26	36	18	24	32	28	29	31	35	42	55	30	21	18	28	28	30	20	33	36	39	38	43
4.25	37	33	37	24	19	20	19	49	42	57	52	44	37	32	29	34	31	32	32	37	43	55	55	40	32	33	29	42	21	37	37	29	31	33	39	44	60	39	24	24	33	34	34	24	35	39	44	38	47
4.5	36	37	37	25	19	21	21	54	47	60	56	45	41	36	34	40	35	38	37	43	48	61	61	39	36	39	33	46	25	50	43	32	33	38	41	49	64	46	29	29	40	39	40	30	38	43	48	38	51
4.75	39	42	40	29	22	22	22	61	54	68	63	48	45	42	42	48	40	44	44	51	54	66	67	42	37	46	39	52	31	61	50	36	38	44	46	54	69	53	34	37	48	47	46	37	44	48	54	41	57
5	38	44	39	30	21	22	22	66	58	71	65	47	47	44	45	52	43	50	49	55	58	70	70	41	40	50	41	54	32	67	54	38	39	47	47	57	72	56	38	41	52	52	49	43	46	52	58	41	59
5.25	38	48	40	34	21	23	23	71	63	74	72	48	51	48	49	57	47	54	53	59	63	74	74	43	44	54	48	58	35	73	58	42	43	54	50	64	78	61	42	47	56	57	53	48	51	55	61	42	63
5.5	39	54	42	38	23	23	24	76	68	81	77	49	56	52	54	62	51	59	59	65	69	78	79	44	49	58	55	60	39	78	63	47	46	60	53	69	82	65	46	51	60	62	58	54	55	60	64	43	69
5.75	40	59	44	45	24	25	26	81	74	87	82	52	61	55	58	67	56	64	64	70	74	84	84	46	55	62	65	65	44	84	69	52	51	68	57	74	87	69	52	56	64	67	63	61	61	66	69	45	74
6	37	61	42	46	23	24	24	82	76	89	85	49	62	56	58	67	56	64	65	72	76	86	85	44	56	63	70	65	45	86	71	56	52	73	57	77	87	69	51	57	64	70	64	62	62	67	70	45	76
6.25	40	65	46	52	25	25	25	88	82	93	89	50	67	60	62	71	60	68	68	76	79	90	89	45	61	66	78	69	48	90	75	62	55	79	59	82	93	72	54	61	68	73	68	67	66	71	74	47	81
6.5	41	68	49	57	26	25	24	91	85	93	93	50	71	63	65	73	63	70	70	79	83	92	92	44	66	70	84	71	51	92	79	67	59	85	62	85	96	74	57	65	70	76	71	71	70	73	76	47	87
6.75	41	72	49	61	26	25	25	95	89	98	97	52	73	66	66	75	65	72	73	82	86	95	95	44	68	72	89	73	53	97	81	73	61	89	64	89	98	77	57	67	72	78	72	74	72	76	79	47	87
7	44	78	55	67	29	27	28	102	96	104	104	56	78	70	73	81	70	78	78	88	91	100	100	48	73	77	96	78	57	102	87	81	68	97	68	95	102	81	64	73	78	83	78	80	77	82	85	52	93
7.25	40	80	54	70	27	26	27	105	98	106	107	56	78	70	72	81	71	79	79	89	92	101	102	47	74	77	97	78	58	103	89	85	70	100	68	96	104	81	63	74	78	84	78	81	78	83	87	51	94
7.5	43	84	57	74	29	28	28	111	104	112	113	58	82	74	76	85	74	82	83	93	97	105	105	48	78	81	102	82	61	107	93	91	76	106	71	100	108	85	66	78	82	88	81	85	82	87	90	53	99
7.75	44	89	60	80	30	27	28	114	108	115	117	62	85	78	80	88	78	85	87	96	100	108	108	49	81	84	106	84	63	110	97	96	80	110	73	102	110	87	68	81	84	90	83	89	86	91	93	54	102
8	43	91	60	83	30	27	27	117	111	120	120	62	87	78	81	89	79	87	88	98	102	110	110	49	83	86	107	86	63	111	99	99	83	114	74	105	112	88	70	82	86	91	85	90	87	92	95	54	105
8.25	45	95	63	89	32	28	29	122	117	125	126	63	90	82	85	93	83	90	91	101	107	113	114	49	86	89	111	88	66	114	102	103	87	118	77	106	116	91	73	86	90	94	88	94	91	96	99	56	109
8.5	45	99	64	94	34	29	30	128	121	130	131	68	92	85	87	95	86	93	94	105	110	117	117	52	89	92	115	90	69	118	106	109	92	124	79	109	119	94	74	89	92	98	91	97	95	100	103	58	111
8.75	47	103	67	100	34	29	30	130	125	133	136	68	95	88	89	98	88	95	97	106	113	119	120	52	91	95	118	92	70	120	109	112	95	126	82	112	122	96	77	93	95	99	92	100	97	103	105	58	115
9	47	108	69	106	36	30	31	135	130	138	142	71	98	92	92	101	91	99	100	109	117	122	123	53	94	98	121	95	72	122	112	117	100	131	85	115	126	98	79	95	98	101	96	104	101	107	109	60	118
9.25	46	112	72	112	38	31	33	140	135	142	147	75	99	93	95	104	94	101	103	113	120	126	127	56	95	100	125	98	74	126	116	121	105	135	88	118	129	101	82	98	101	105	98	107	106	110	112	63	120
9.5	46	114	73	115	38	30	32	142	136	145	148	74	100	95	96	105	96	103	104	114	121	127	126	53	98	101	126	99	74	126	118	123	106	137	89	118	133	102	82	99	101	106	99	107	106	112	113	61	123
9.75	47	117	75	121	40	32	34	147	141	149	153	77	104	97	98	108	99	106	107	117	125	131	129	57	100	103	129	101	76	129	122	128	112	140	94	121	136	104	84	103	104	109	102	111	111	115	117	64	125
10	48	120	77	126	43	33	33	150	143	152	155	77	106	100	101	109	102	107	109	119	127	132	131	55	103	106	131	103	78	131	125	130	115	142	97	122	141	106	86	105	106	110	104	112	112	118	119	64	129
10.25	48	122	78	129	44	33	34	154	147	154	158	79	107	102	103	111	104	108	112	121	130	135	134	56	105	108	134	104	79	132	128	133	118	146	99	124	144	108	88	107	108	112	105	115	115	120	121	65	131
10.5	45	123	77	131	43	32	33	154	148	155	159	79	106	102	103	111	104	109	113	123	131	135	134	55	104	108	134	105	79	133	129	135	120	147	101	125	146	108	87	107	108	112	104	115	116	121	123	63	130
10.75	46	125	78	134	45	32	31	157	150	158	162	79	109	105	104	113	106	111	114	123	133	136	136	55	106	110	135	106	80	134	132	136	123	148	104	125	148	109	88	108	109	113	106	117	118	123	125	63	133
11	47	127	81	138	48	31	32	161	153	160	164	80	110	106	106	115	108	112	117	125	136	139	138	56	108	112	137	108	82	135	135	140	126	151	107	126	153	112	90	110	111	115	108	119	121	124	127	64	135
11.25	48	130	83	142	50	33	33	164	156	163	166	82	112	110	109	117	111	115	120	128	138	142	141	56	111	114	141	110	84	138	139	142	130	154	111	129	156	114	93	113	113	117	109	122	125	128	131	66	139
11.5	48	131	85	144	51	33	32	167	158	165	169	83	114	111	109	118	112	116	122	129	140	143	141	56	111	115	142	111	84	139	141	143	133	155	114	130	159	114	93	114	114	118	110	122	125	128	132	64	140
11.75	48	134	87	148	53	33	33	170	161	169	171	85	116	112	112	120	116	118	125	132	143	145	145	57	113	117	145	113	86	141	145	146	138	158	117	132	163	117	95	116	116	120	112	125	128	132	134	66	142
12	46	135	89	151	54	33	33	173	162	171	173	86	116	114	113	121	116	119	125	134	144	147	146	57	114	119	146	114	86	143	147	148	140	159	121	132	165	119	96	118	118	122	114	126	130	133	136	65	143
12.25	49	137	91	156	59	35	35	176	166	175	177	89	119	117	116	124	120	122	130	137	148	151	150	59	117	121	149	117	89	144	151	152	145	164	124	137	168	121	98	121	121	124	116	130	134	136	140	68	145
12.5	47	138	90	158	59	34	34	179	168	176	177	88	119	118	116	125	121	123	131	138	149	151	150	57	117	121	149	117	88	145	153	152	146	164	127	137	169	121	98	121	121	125	116	130	134	137	141	67	146
12.75	50	142	93	162	62	36	36	183	170	178	180	89	122	121	120	128	125	125	134	140	151	153	153	59	120	125	152	120	91	147	157	156	150	167	131	139	175	124	101	125	123	127	119	133	137	140	143	69	150
13	48	143	93	164	63	35	35	184	172	181	181	91	122	121	120	129	127	126	136	142	154	155	154	59	121	125	154	120	92	149	160	157	153	168	134	140	175	124	101	125	124	128	120	135	138	141	145	68	150
13.25	49	144	94	168	66	36	36	187	175	184	185	94	124	124	122	131	129	127	138	143	156	158	156	61	122	128	156	123	94	151	164	159	157	171	138	142	178	126	103	127	127	130	122	136	142	144	148	69	153
13.5	50	146	96	170	68	35	36	190	176	185	185	95	127	127	124	132	131	129	139	144	157	159	157	61	125	129	157	123	95	152	166	161	159	172	140	142	181	128	104	129	128	131	123	138	143	144	150	70	156
13.75	52	150	99	174	73	37	37	193	179	188	187	96	129	130	126	136	134	132	142	147	160	161	160	61	127	131	159	126	97	154	170	163	163	174	145	144	185	131	106	131	131	133	125	140	146	148	152	70	158
14	52	152	100	175	73	37	37	195	182	190	189	98	130	131	128	137	137	132	145	149	162	162	162	62	128	133	161	127	98	156	172	164	166	176	148	145	187	132	107	134	133	134	127	142	147	149	154	69	160
14.25	51	152	101	178	73	36	37	197	182	191	190	99	130	132	128	137	138	134	147	150	163	163	162	62	130	134	163	128	99	157	175	166	167	177	150	146	189	133	107	134	133	135	127	142	148	150	155	70	161
14.5	50	152	101	178	73	35	35	199	182	192	190	98	131	132	128	138	139	133	147	151	163	164	162	60	129	133	161	128	98	156	175	165	168	177	151	146	189	133	107	135	133	135	126	142	149	150	156	68	161
14.75	52	155	106	182	77	38	38	202	186	195	194	102	133	136	132	141	142	136	150	153	167	167	166	62	132	136	165	131	101	160	180	169	173	179	155	149	193	136	111	138	137	138	130	145	153	154	159	71	166
15	52	157	107	184	77	37	38	204	188	197	195	103	134	138	133	143	145	137	152	154	168	168	167	62	133	138	166	132	103	161	181	170	174	181	158	150	194	137	111	139	139	139	130	147	153	155	161	69	166
15.25	51	156	107	186	80	38	36	206	188	198	195	103	134	139	134	143	146	137	152	156	168	169	167	61	134	138	165	133	103	161	184	171	175	181	160	150	195	138	112	140	140	140	131	148	154	156	161	71	167
15.5	50	158	109	188	80	36	38	208	190	199	197	105	136	141	136	144	148	139	154	158	170	170	169	61	135	139	167	134	104	163	186	172	178	182	161	151	198	139	113	141	142	141	132	148	156	157	163	70	169
15.75	52	161	111	190	83	38	38	211	193	202	200	107	138	142	137	146	151	141	158	159	172	171	171	63	137	141	169	136	105	165	189	175	180	184	166	154	200	141	115	143	144	143	134	151	158	160	165	71	171
16	52	163	113	194	85	39	40	214	195	205	202	111	140	145	140	148	154	144	160	162	175	174	174	66	138	144	171	138	107	167	193	176	183	186	168	156	202	143	116	145	147	146	136	153	161	163	168	72	173
16.25	48	163	112	194	83	38	39	215	196	205	202	112	139	144	139	147	154	144	160	163	176	175	174	65	137	143	170	139	107	167	194	177	184	186	169	156	202	142	115	144	146	145	135	153	161	163	168	71	171
16.5	50	165	116	197	85	39	39	216	199	208	204	114	141	145	141	151	158	146	162	165	178	176	174	66	140	145	173	141	109	169	196	178	186	188	171	157	206	145	117	147	149	147	138	155	162	164	170	71	174
16.75	50	166	118	200	87	39	40	219	200	210	207	118	142	147	144	152	161	148	164	166	180	179	178	67	140	147	175	142	111	171	198	181	188	189	174	159	208	145	119	148	150	149	139	157	165	166	172	72	175
17	51	167	120	202	89	39	39	220	202	211	207	117	144	149	145	153	162	148	165	166	180	178	178	66	143	149	175	143	112	172	201	180	189	190	176	159	209	147	119	149	153	149	140	157	166	167	172	71	177
17.25	52	171	122	204	92	40	41	223	204	214	210	121	145	151	147	155	166	150	169	170	182	181	181	68	144	150	177	146	113	173	204	182	192	192	179	161	212	149	121	152	154	152	142	161	168	169	175	73	179
17.5	49	169	120	203	93	38	38	222	202	212	207	118	146	151	146	155	165	149	167	169	182	180	179	64	143	148	176	144	112	172	203	182	191	190	178	159	212	149	120	152	154	150	141	158	168	169	174	70	179
17.75	53	173	124	208	96	40	41	225	206	216	212	124	149	156	149	159	170	153	171	172	185	183	183	69	147	153	179	148	115	176	207	185	195	194	182	163	214	153	124	154	158	154	144	162	172	172	177	74	182
18	53	173	126	209	98	41	41	226	207	217	212	124	150	157	150	159	172	153	172	172	186	184	184	68	149	153	179	149	116	176	208	186	195	194	183	164	216	153	124	157	160	154	145	163	173	173	178	74	184
18.25	52	174	127	210	99	41	40	227	208	218	214	126	151	158	151	160	174	154	173	173	187	185	184	67	150	155	180	149	117	178	211	186	197	195	184	166	217	155	125	156	160	156	147	165	174	174	179	73	186
18.5	52	174	127	211	99	39	39	228	209	218	214	126	151	159	151	160	175	155	173	173	187	184	184	66	150	154	180	150	117	177	211	186	198	195	185	165	218	154	124	157	160	156	146	164	174	174	179	72	187
18.75	53	176	130	212	102	40	40	230	211	220	215	128	153	162	153	163	178	157	175	175	189	186	186	67	153	157	182	151	118	179	214	188	199	195	187	167	220	157	126	159	163	158	148	166	176	175	180	73	190
19	53	178	132	214	103	41	40	232	212	221	217	131	155	163	155	165	180	159	177	177	190	187	187	68	155	158	183	153	119	180	215	190	200	197	188	168	222	158	127	160	165	160	148	168	178	176	182	73	190
19.25	55	179	133	216	105	41	41	233	213	223	218	133	157	165	155	166	182	159	178	178	192	189	188	68	157	159	184	154	121	181	217	190	202	199	190	168	223	159	129	162	166	160	150	168	179	178	184	74	191
19.5	53	180	134	218	107	41	41	235	214	224	218	134	157	165	156	167	183	160	179	179	193	189	190	67	157	160	185	155	121	182	219	192	202	199	191	170	224	160	129	163	167	161	151	169	179	179	185	74	193
19.75	52	180	133	218	107	40	39	235	214	224	219	135	157	166	156	166	184	160	179	179	192	189	190	66	158	159	184	155	120	181	219	191	202	199	192	170	224	159	128	163	167	161	151	169	180	179	185	74	192
20	55	183	136	220	111	42	41	237	216	225	221	138	160	169	159	169	187	162	182	181	195	190	192	68	161	162	187	156	123	183	222	193	204	200	194	171	227	162	130	166	170	163	153	171	182	180	187	74	196
20.25	56	184	137	222	113	41	41	238	217	226	221	139	162	171	160	170	190	163	183	181	196	191	192	67	163	163	187	158	124	184	223	193	205	201	195	172	228	164	132	167	171	164	154	172	183	181	187	73	197
20.5	54	184	137	222	115	42	41	239	218	227	222	140	162	172	161	171	191	164	184	183	197	192	192	67	162	163	187	159	124	185	224	194	206	201	196	172	228	164	133	167	172	166	154	173	183	182	188	74	198
20.75	53	186	138	223	115	41	40	240	219	227	223	142	162	172	160	171	192	164	185	184	198	193	194	67	163	164	188	159	125	186	225	195	207	202	197	174	229	164	132	169	172	166	155	173	184	182	189	73	199
21	53	183	136	222	122	51	49	246	222	234	226	152	162	172	162	172	195	169	190	192	204	201	201	74	163	163	186	159	129	189	228	202	213	207	202	182	225	163	136	171	176	169	163	180	193	190	197	85	197
21.25	54	189	143	226	118	42	42	243	221	231	226	148	166	176	163	174	198	168	189	187	201	196	197	68	167	167	191	162	128	189	229	198	210	205	200	176	232	168	135	171	176	170	159	176	188	185	192	75	203
21.5	54	189	143	226	121	42	42	244	222	231	226	149	166	177	164	175	199	168	188	187	201	196	197	68	167	167	190	162	128	189	229	198	210	205	200	177	232	169	135	172	177	171	158	176	188	186	192	75	203
21.75	52	188	141	226	125	51	49	250	225	238	230	159	165	174	165	176	201	173	194	196	208	205	204	77	166	166	189	163	133	193	232	205	217	210	206	186	227	166	137	174	180	173	167	183	198	193	201	85	200
22	53	191	145	229	123	41	40	246	224	233	228	154	168	178	165	177	202	170	192	190	203	199	199	69	169	169	192	164	131	191	231	200	212	206	202	179	233	169	135	173	178	172	160	178	190	187	195	74	204
22.25	52	191	145	229	123	40	40	247	223	234	227	154	168	178	165	177	203	170	191	190	204	198	200	67	169	168	192	165	130	192	230	200	212	207	203	179	233	170	136	173	178	172	160	177	191	188	194	73	205
22.5	53	192	146	230	125	41	41	248	224	235	229	156	170	180	167	178	206	171	194	192	204	199	201	68	171	170	193	166	131	193	233	201	213	207	204	181	235	171	138	175	179	173	161	179	192	189	195	74	207
22.75	56	194	149	231	130	43	41	249	225	235	230	158	172	184	169	180	207	172	195	192	206	200	201	68	173	172	194	167	134	194	233	202	214	208	205	181	236	173	139	177	182	175	163	180	193	189	196	75	209
23	53	194	149	231	128	40	39	249	226	236	230	159	172	183	168	179	208	173	195	193	206	199	201	67	173	171	193	167	133	194	233	202	213	207	204	182	236	172	138	176	181	175	162	179	193	189	196	73	208
23.25	52	195	150	232	130	41	39	251	227	237	231	161	173	184	169	180	210	174	196	194	207	201	202	67	174	172	195	168	134	194	234	203	214	208	206	182	238	173	140	176	182	176	164	180	194	190	197	73	210
23.5	55	198	155	236	134	44	43	253	230	240	234	165	175	187	172	183	214	177	200	197	210	204	205	71	177	175	197	171	137	198	237	205	217	211	209	185	239	176	143	180	185	179	168	183	197	193	199	76	214
23.75	55	199	156	236	134	42	41	253	230	240	233	165	175	188	172	184	215	177	199	196	209	203	205	69	177	176	197	171	137	198	238	205	217	211	208	185	240	177	143	180	186	179	167	183	196	193	199	74	214
24	53	197	153	235	139	52	50	260	234	247	238	176	174	185	173	185	217	182	205	205	218	212	214	79	175	174	196	172	141	202	240	212	225	217	214	195	235	174	146	183	189	182	176	190	207	202	209	85	210
24.25	54	200	158	237	139	43	42	255	231	241	235	169	177	190	174	186	218	179	202	199	212	206	207	70	179	177	199	173	138	201	239	207	218	212	210	187	241	179	144	182	188	181	170	184	199	195	201	76	216
24.5	53	199	156	237	143	51	50	261	235	248	240	179	176	188	175	187	220	184	206	206	219	214	215	78	178	175	197	173	142	204	242	214	226	219	215	196	236	176	147	185	190	184	177	192	208	203	211	86	212
24.75	55	202	162	240	142	44	42	257	233	243	237	173	180	193	177	188	221	182	204	201	214	207	210	71	182	179	201	175	141	203	240	209	221	214	212	189	242	181	147	185	190	183	172	187	201	197	204	75	218
25	55	203	163	241	144	43	43	259	234	245	239	175	180	194	177	190	224	183	206	202	215	209	210	71	182	180	201	176	142	204	241	210	222	215	213	191	243	182	148	186	191	185	174	188	203	199	205	77	219
25.25	54	203	164	241	144	43	41	258	234	245	238	176	180	194	177	189	224	183	206	202	215	208	210	70	183	180	201	176	142	204	241	209	221	215	213	191	243	182	148	186	191	185	174	187	203	199	205	76	219
25.5	54	205	165	242	146	43	41	260	235	246	239	177	182	196	178	190	225	184	207	204	216	209	211	70	185	181	202	177	143	205	242	210	222	216	214	192	244	184	149	187	192	186	174	188	204	199	206	75	221
25.75	56	207	169	244	148	44	43	261	237	247	241	179	184	198	180	193	228	186	209	205	217	211	212	72	186	183	204	179	146	208	244	212	224	217	216	193	245	185	151	189	194	188	176	191	205	201	207	77	223
26	57	207	171	244	150	45	43	261	237	247	242	180	185	200	181	194	229	188	210	206	218	211	214	71	188	184	205	180	146	208	244	212	224	217	216	194	246	187	152	190	196	189	177	191	206	201	208	77	224
26.25	57	209	174	246	150	45	43	262	238	249	243	181	186	200	183	195	231	188	211	207	219	213	214	71	189	185	206	181	147	209	245	213	225	218	217	195	247	188	154	191	196	191	178	192	207	202	208	77	225
26.5	53	206	173	244	150	43	41	261	237	248	241	181	184	199	181	193	230	187	210	207	219	212	214	70	188	183	205	179	146	208	243	213	224	217	216	194	245	186	152	190	195	189	177	190	206	202	208	74	223
26.75	55	207	176	245	151	43	41	262	238	249	242	182	186	202	182	195	231	188	211	207	219	212	214	70	189	185	206	181	148	210	244	214	225	218	217	195	247	188	154	192	197	191	179	191	207	202	209	75	225
27	57	211	180	248	151	44	43	264	240	252	245	186	188	204	185	198	234	191	215	210	222	215	216	73	191	187	208	184	150	213	245	215	227	220	219	197	248	190	156	194	200	194	181	194	210	204	211	78	228
27.25	54	211	179	247	151	44	42	264	240	252	245	186	188	202	185	197	234	191	214	210	222	215	217	71	190	187	207	183	150	213	246	215	227	220	219	198	247	189	155	194	199	193	181	194	210	204	211	76	227
27.5	56	211	182	248	153	44	42	263	241	251	245	187	190	204	186	198	235	192	215	211	222	216	217	70	192	187	208	185	150	213	246	216	227	220	219	199	248	191	156	195	201	194	182	194	210	205	212	77	229
27.75	56	211	182	248	156	45	42	265	241	252	246	187	190	206	186	199	236	193	216	211	223	216	218	72	193	188	209	185	152	214	247	216	228	221	221	200	248	192	158	196	201	196	184	195	212	206	213	77	230
28	54	211	183	248	154	44	41	265	241	252	245	188	190	206	186	199	237	193	215	211	223	216	218	69	193	188	209	185	151	214	246	216	227	220	220	199	248	191	157	196	201	196	183	194	211	205	213	75	229
28.25	58	215	185	251	156	45	42	266	244	254	248	190	193	210	188	202	239	195	218	214	225	218	220	72	196	191	211	188	154	217	249	218	229	222	222	201	250	195	161	199	204	199	186	197	213	207	215	77	232
28.5	55	214	185	250	154	44	43	265	243	254	247	190	192	208	189	201	240	196	218	214	224	218	220	71	196	190	210	188	155	216	248	218	229	222	222	201	248	194	160	199	204	199	186	197	213	207	215	77	232
28.75	55	213	185	249	152	44	40	265	243	254	247	191	192	209	188	201	240	196	218	214	225	218	221	70	196	190	210	187	154	216	248	218	228	222	221	201	249	194	160	200	203	199	186	197	213	207	215	75	232
29	57	217	189	253	152	44	43	266	245	256	249	193	195	211	190	203	242	199	220	216	226	220	222	72	198	193	212	190	157	219	249	219	231	223	223	204	251	197	162	201	205	201	188	199	214	209	217	76	234
29.25	55	218	190	255	152	45	43	268	248	259	251	195	196	211	192	204	244	201	223	218	228	222	224	74	199	194	214	192	159	221	250	222	232	225	224	206	252	197	164	202	207	203	189	200	216	211	218	78	235
29.5	56	218	192	254	151	45	42	268	247	258	251	195	196	212	192	205	245	201	222	219	228	222	224	73	200	194	214	193	159	222	250	221	232	225	225	206	251	198	164	202	207	203	191	201	216	211	219	78	235
29.75	54	217	190	253	150	45	41	267	246	257	250	196	196	211	192	204	244	201	222	218	228	222	224	71	200	193	213	191	159	221	249	222	231	225	224	205	250	197	163	203	207	203	190	200	216	211	219	76	235
30	58	218	192	254	151	46	43	268	248	258	252	197	198	217	194	208	245	202	223	219	229	223	225	72	203	196	215	194	161	222	251	222	232	226	226	207	253	200	167	205	209	205	192	202	218	212	220	77	237
30.25	56	220	193	256	152	45	43	269	249	259	253	198	199	216	195	208	247	204	225	220	230	223	225	72	203	197	216	194	162	223	251	222	233	226	226	207	252	201	167	205	211	206	192	202	218	213	221	76	238
30.5	56	221	195	257	152	45	43	269	250	260	253	199	199	217	195	209	248	205	226	220	230	225	226	72	203	197	216	195	163	225	252	223	233	227	227	208	253	202	168	206	211	207	193	203	219	213	221	76	239
30.75	56	222	197	257	154	45	42	270	250	261	254	200	200	218	196	210	248	206	226	222	231	225	226	73	205	199	217	197	164	225	252	224	234	228	227	209	253	203	168	207	212	208	194	203	219	214	222	77	239
31	57	221	196	256	157	46	42	270	250	261	254	200	201	219	197	210	249	206	226	222	231	225	227	72	205	199	217	196	164	225	251	224	233	227	227	210	253	204	169	208	213	208	195	204	220	214	222	77	240
31.25	56	221	197	256	159	44	41	270	250	261	253	201	201	218	197	210	249	206	226	222	231	224	226	71	206	198	217	196	165	225	251	224	234	227	226	209	253	204	168	207	213	208	195	204	219	214	222	75	240
31.5	55	223	198	257	161	44	40	270	251	261	255	202	201	219	198	211	250	207	227	224	231	226	228	72	206	199	217	198	166	226	252	225	234	228	227	210	253	205	169	208	213	210	196	204	220	214	223	75	241
31.75	57	222	199	257	165	46	43	270	252	262	256	204	202	221	199	212	250	208	228	224	232	227	229	72	207	200	218	199	166	227	252	226	235	229	229	212	253	206	171	211	215	211	198	206	222	216	225	78	241
32	56	226	202	260	166	47	43	272	254	264	257	206	204	221	200	214	253	211	230	226	234	229	231	75	209	202	220	201	169	229	253	227	236	230	229	214	255	207	171	212	217	213	200	207	223	218	226	78	243
32.25	55	224	201	258	168	45	41	271	252	263	256	204	203	221	200	214	252	210	230	226	233	228	229	72	208	201	219	200	168	229	252	227	236	230	228	213	253	207	171	211	216	212	199	207	223	217	226	76	242
32.5	56	227	204	261	171	46	43	272	254	265	258	207	205	221	202	215	254	212	232	228	235	231	231	75	209	202	221	202	171	231	254	229	238	232	230	216	254	208	173	213	217	214	201	208	225	219	228	78	243
32.75	58	228	206	262	175	47	44	273	256	265	259	209	207	225	204	217	255	214	232	228	236	231	232	75	212	205	222	205	173	232	255	229	238	232	231	216	256	211	175	215	219	216	203	210	225	220	228	78	246
33	56	230	208	264	173	47	45	274	257	268	260	211	207	222	205	218	257	215	235	231	238	233	235	78	211	205	223	206	174	234	256	231	240	234	232	218	256	211	175	215	220	216	204	211	227	221	230	80	246
33.25	56	230	209	263	173	46	43	273	257	267	259	210	208	224	205	218	257	215	234	230	237	232	233	75	212	206	224	206	174	233	255	230	239	233	232	217	256	212	175	215	221	217	204	210	226	221	228	77	247
33.5	56	230	209	263	173	46	43	273	258	267	259	211	208	225	206	219	257	216	235	230	237	233	233	75	213	206	224	207	175	234	255	231	240	232	232	217	256	213	176	216	221	218	204	210	227	221	229	78	246
33.75	57	232	211	264	174	47	44	274	258	268	260	212	210	227	206	220	259	217	236	231	238	233	234	74	215	208	225	208	175	235	256	232	240	234	233	218	258	214	178	218	223	219	206	211	228	222	230	78	250
34	58	230	210	262	174	46	43	274	258	267	261	213	210	228	206	220	258	217	235	231	239	233	235	75	215	208	224	208	176	235	255	231	239	233	233	219	256	214	178	218	223	220	206	211	229	222	230	78	248
34.25	54	229	210	263	175	45	42	274	258	268	260	213	209	227	206	220	258	217	235	232	239	234	235	74	215	207	224	207	176	235	254	232	240	234	233	219	255	214	177	218	222	220	206	211	229	222	230	77	248
34.5	56	230	211	263	176	47	43	274	258	267	261	214	211	229	207	221	259	218	236	232	239	234	236	74	216	209	225	208	177	235	255	232	240	235	233	220	256	215	179	219	224	221	207	212	229	223	231	79	249
34.75	55	231	212	263	177	45	42	274	259	268	261	215	211	228	207	221	259	219	236	233	240	234	236	74	216	209	225	209	177	236	255	233	240	235	233	221	255	215	179	220	224	221	207	213	230	224	232	77	248
35	59	233	214	264	179	47	43	275	260	269	262	216	213	231	210	223	260	220	238	234	241	236	237	75	219	211	227	210	179	237	256	234	241	236	235	222	257	218	182	222	226	223	210	214	231	224	233	79	252
35.25	58	233	214	264	180	47	43	275	260	269	263	216	213	231	210	223	261	221	238	234	241	235	237	74	219	211	227	212	180	238	257	234	242	236	234	222	257	218	181	222	226	224	210	214	232	225	233	79	251
35.5	55	232	215	265	180	45	42	274	260	269	262	217	213	230	209	223	261	221	239	235	241	236	237	74	218	211	226	211	180	238	256	234	241	236	235	222	256	217	180	221	226	224	210	214	231	224	233	77	250
35.75	56	232	214	262	181	46	41	274	259	268	261	217	213	232	210	223	260	221	237	234	241	235	236	73	219	211	227	211	180	237	255	233	240	235	233	222	256	218	182	222	226	224	210	214	231	224	232	77	251
36	58	233	216	264	183	46	43	275	261	270	263	218	215	233	211	225	262	222	239	235	241	236	238	74	221	213	228	213	181	239	256	234	242	237	235	223	257	220	183	224	228	226	212	215	232	226	234	78	253
36.25	56	234	217	265	183	46	42	275	262	270	263	219	215	232	211	225	262	223	239	236	243	237	239	73	221	213	228	213	182	239	257	235	242	237	235	224	256	219	183	224	228	226	212	216	233	226	235	77	252
36.5	55	235	218	266	184	46	41	276	262	271	264	221	215	232	212	226	263	224	241	238	244	239	240	75	220	213	228	214	183	241	257	236	244	238	236	225	257	220	184	225	229	227	214	217	235	227	236	79	253
36.75	58	236	220	267	185	48	44	276	263	272	265	222	217	235	214	227	264	226	242	238	244	239	241	76	222	216	230	216	185	242	258	237	244	238	237	226	258	222	186	227	231	228	215	218	235	228	236	79	254
37	55	236	220	266	185	46	42	275	263	272	264	222	216	233	213	227	263	225	242	238	244	240	241	74	222	215	229	215	185	242	257	237	243	239	237	226	257	221	185	226	230	228	215	217	235	228	236	78	254
37.25	58	237	222	268	188	48	44	277	265	273	266	224	218	237	215	230	265	227	243	240	246	241	243	77	224	217	231	217	187	243	259	238	245	239	238	227	258	224	188	229	232	230	217	219	237	229	238	80	256
37.5	59	240	224	269	189	48	45	277	266	274	267	226	219	237	217	230	266	229	245	242	247	242	244	79	224	218	233	219	189	245	259	239	246	240	239	229	259	224	189	229	234	232	218	221	238	231	238	80	257
37.75	55	237	222	267	188	45	42	277	264	274	266	225	217	234	215	229	265	228	244	241	246	241	243	76	223	217	230	218	187	244	258	239	245	239	238	228	257	224	187	228	232	230	217	220	236	230	238	79	256
38	58	239	224	268	189	48	43	277	265	274	267	225	219	238	217	230	266	229	244	241	246	241	243	76	225	218	232	219	189	244	259	239	246	240	239	228	258	225	189	229	234	232	218	220	237	230	239	79	257
38.25	58	238	225	267	191	48	44	276	265	273	267	226	219	239	217	231	266	229	245	242	247	241	244	75	226	219	232	220	189	245	257	239	245	241	239	228	258	226	190	231	234	232	219	221	238	231	239	80	258
38.5	59	241	227	269	191	48	43	277	266	274	267	227	220	239	218	232	267	231	246	243	248	243	245	77	226	221	233	221	191	247	259	239	246	241	239	229	259	227	191	231	235	234	220	222	238	231	240	79	259
38.75	59	241	228	270	192	48	44	278	267	275	268	229	221	241	219	233	268	232	247	243	248	244	246	78	227	221	235	222	192	247	260	241	247	242	240	229	260	228	192	232	236	234	221	223	239	232	241	80	260
39	57	239	226	268	192	46	42	276	266	273	267	227	219	239	217	232	266	231	245	243	248	243	245	75	226	220	233	221	191	246	258	240	245	241	239	229	258	227	191	231	235	234	220	222	239	231	240	78	258
39.25	59	241	228	269	193	49	44	278	266	275	268	229	221	241	219	233	267	232	246	245	249	244	247	76	227	221	234	222	193	247	259	241	247	242	240	230	259	228	193	233	237	236	222	223	240	233	242	80	260
39.5	59	242	230	270	194	49	45	279	268	276	270	231	222	241	220	235	269	234	248	246	250	246	248	77	228	223	235	224	195	249	260	242	248	243	242	231	260	229	194	235	238	237	223	224	241	234	242	80	261
39.75	57	242	229	269	194	46	42	277	267	275	268	230	221	241	219	233	268	232	247	245	249	244	247	75	227	222	235	223	193	249	259	241	246	242	241	229	258	229	194	233	237	236	223	224	240	232	241	79	260
40	60	244	231	270	195	49	44	278	268	275	269	232	223	243	221	235	269	235	248	246	250	245	248	77	229	225	236	225	196	250	260	242	248	243	242	230	260	231	196	235	239	238	224	225	242	234	242	80	262
40.25	57	243	230	270	195	46	42	278	268	276	269	232	221	241	220	235	269	235	249	246	250	246	248	76	227	224	235	224	195	250	259	243	248	243	241	231	258	229	195	234	238	238	224	224	241	234	243	79	261
40.5	57	244	232	271	197	48	44	279	269	278	271	234	221	242	222	236	270	236	250	248	252	247	250	79	227	225	236	226	197	251	260	245	249	244	242	232	259	230	196	235	239	239	226	226	242	235	244	80	262
40.75	60	246	234	271	198	48	46	280	271	278	271	236	223	244	223	237	271	237	251	248	253	248	251	79	229	226	237	228	199	252	261	245	250	245	244	233	260	232	198	237	241	240	227	227	244	236	244	82	264
41	61	245	234	271	197	49	44	279	270	277	270	235	224	247	223	238	270	237	250	248	252	246	249	77	230	227	237	227	198	251	261	244	249	243	243	230	261	234	198	237	241	241	227	227	243	235	244	80	264
41.25	56	244	233	271	198	48	42	279	269	277	271	235	222	243	222	236	269	236	250	249	252	248	250	77	228	225	237	227	198	251	260	245	249	244	243	232	258	231	197	236	240	240	227	226	243	235	244	79	262
41.5	59	246	236	272	200	47	43	280	271	277	271	237	223	245	224	238	271	238	251	249	253	248	250	78	229	228	239	229	200	253	261	245	250	245	244	233	259	233	199	238	242	241	229	228	244	236	245	80	264
41.75	60	248	237	273	200	48	45	279	272	278	273	238	224	246	225	240	272	239	252	250	254	249	252	79	229	228	239	229	201	254	262	246	251	245	245	232	260	235	199	238	243	243	229	229	245	237	246	81	265
Data File	J:\Service\Customer\400\411\ShID_561\data\Assays\10138\crod_SIDx6450xICC169___5_37_138_209_Marx25x2013_A_03A.oka
Set up Time	Mar 25 2013 3:42 PM
Position	3-A
Plate Type	PM05-
Strain Type	NOT APPLICABLE
Sample Number
Strain Name	Crod
Strain Number	SID_6450_ICC169
Other
Hour	A01	A02	A03	A04	A05	A06	A07	A08	A09	A10	A11	A12	B01	B02	B03	B04	B05	B06	B07	B08	B09	B10	B11	B12	C01	C02	C03	C04	C05	C06	C07	C08	C09	C10	C11	C12	D01	D02	D03	D04	D05	D06	D07	D08	D09	D10	D11	D12	E01
0	13	3	1	0	0	0	0	0	5	2	15	20	13	0	0	0	0	0	0	0	0	1	8	15	10	0	0	0	0	0	0	0	0	0	7	17	10	0	0	0	0	0	0	0	0	0	8	16	13
0.25	19	7	8	2	3	4	16	10	16	13	28	35	19	1	6	2	0	2	9	7	5	11	17	27	14	2	2	2	0	3	0	6	7	12	17	30	15	3	3	2	0	6	0	7	7	12	16	30	16
0.5	21	8	11	4	5	6	17	12	19	14	30	35	22	3	8	2	2	4	11	9	7	13	19	27	16	3	4	4	0	6	0	8	8	12	18	31	17	6	7	3	0	9	0	9	9	12	18	31	18
0.75	20	8	9	4	4	5	18	12	19	16	33	37	21	2	7	2	0	3	10	7	5	12	17	27	14	2	2	3	0	4	0	5	6	12	17	31	19	4	4	4	0	7	0	7	7	12	17	31	23
1	22	9	12	6	8	10	21	15	22	17	37	41	22	3	9	3	2	6	12	10	7	15	20	30	15	3	4	5	0	8	0	9	9	14	20	33	19	6	6	5	2	10	1	10	9	16	19	34	24
1.25	23	10	12	6	8	10	20	15	22	18	36	40	22	3	9	4	3	6	13	10	8	14	20	30	16	4	4	5	0	8	0	9	9	14	21	35	20	6	7	7	1	11	2	11	10	16	20	35	24
1.5	23	12	13	7	10	12	23	17	24	19	39	43	24	4	11	6	5	7	15	12	9	16	21	32	17	5	5	6	0	10	1	11	11	17	22	36	22	8	8	8	3	13	4	12	12	19	22	37	27
1.75	24	16	16	8	12	13	24	18	24	21	38	43	26	6	12	7	7	10	15	13	11	17	24	33	20	7	7	8	1	12	2	12	13	18	23	38	24	10	10	10	5	15	5	14	14	20	23	39	27
2	25	19	15	10	12	13	24	19	26	21	39	44	27	5	12	8	8	10	16	14	12	19	24	35	20	7	7	8	1	13	3	12	14	18	24	40	24	11	9	11	4	16	6	15	16	21	23	41	28
2.25	24	22	16	11	13	15	26	21	28	23	41	46	26	7	13	9	8	10	18	15	13	20	24	37	20	7	7	10	1	13	4	14	14	20	25	41	24	11	8	12	4	17	6	15	15	22	23	42	29
2.5	26	26	17	12	13	15	26	21	26	23	42	46	28	6	13	8	8	10	18	14	12	19	25	37	20	7	8	9	0	13	4	12	13	19	27	40	26	11	9	12	4	16	6	14	15	21	24	41	30
2.75	29	31	18	13	15	16	26	22	26	25	44	46	29	9	14	9	9	11	17	14	12	20	26	36	23	8	10	11	2	14	5	15	14	20	30	40	28	12	13	12	6	17	7	15	16	21	25	42	32
3	29	35	18	16	16	17	25	23	28	27	44	46	29	12	17	11	10	12	19	16	13	20	28	36	23	10	13	13	4	16	7	18	15	21	34	41	28	15	16	15	8	19	8	15	17	21	25	42	33
3.25	30	39	19	17	19	17	26	25	31	28	45	47	31	15	21	13	14	18	23	19	16	20	32	39	25	14	17	18	7	20	10	21	20	26	38	43	30	19	19	19	11	24	13	17	22	24	26	44	33
3.5	26	38	14	14	11	11	12	17	20	20	36	36	25	17	19	13	10	13	17	15	14	15	28	30	21	15	17	17	8	16	11	17	17	22	36	34	27	19	19	17	10	22	12	10	18	18	18	34	31
3.75	26	43	16	19	13	13	14	19	24	23	39	39	26	21	24	17	16	18	23	19	18	20	34	31	24	18	22	21	12	21	16	21	21	28	42	36	29	22	24	22	14	27	16	14	25	23	20	36	33
4	27	47	17	22	16	14	15	21	25	25	40	41	27	25	28	21	19	22	26	23	23	23	39	32	26	22	27	26	16	25	21	26	26	33	47	39	32	26	28	26	19	31	21	19	29	27	23	39	36
4.25	30	50	20	25	17	17	17	23	27	27	44	44	30	30	33	27	26	27	31	29	29	29	46	35	29	27	30	31	22	31	27	31	31	40	52	43	36	32	33	31	23	37	26	25	35	34	29	41	41
4.5	28	51	22	27	18	18	18	25	29	29	48	48	31	33	37	30	30	30	37	33	33	33	49	38	30	29	34	33	24	34	31	34	34	45	55	45	37	34	35	34	25	40	31	28	39	38	33	47	40
4.75	33	58	27	31	25	22	21	30	35	33	51	53	36	39	43	36	37	38	42	40	40	41	55	42	36	37	41	40	32	42	39	40	42	52	61	51	43	41	42	40	31	48	38	36	46	44	42	52	46
5	35	61	29	34	26	24	23	31	37	36	54	57	38	44	45	40	41	42	47	44	45	46	58	44	37	40	43	43	36	45	43	44	46	56	62	53	45	44	44	41	33	50	42	43	50	49	46	53	46
5.25	38	64	32	39	28	28	26	34	41	39	58	62	43	46	47	43	43	44	50	46	50	50	61	49	41	44	45	46	40	49	47	47	48	60	64	59	49	46	47	45	37	53	45	48	53	52	50	58	49
5.5	43	70	37	43	34	32	30	39	45	45	62	68	49	51	52	48	49	49	55	50	55	53	65	55	48	49	50	51	45	53	51	50	53	64	69	63	55	51	52	50	41	58	51	53	58	56	56	62	55
5.75	48	75	42	47	37	36	32	41	46	48	64	72	51	55	56	51	52	53	59	53	57	58	69	60	50	51	53	54	48	56	55	54	56	67	72	66	57	54	55	54	44	60	54	60	62	59	59	65	56
6	49	77	45	50	40	39	37	47	53	53	70	77	55	56	58	53	56	56	62	58	60	63	73	65	54	53	54	56	50	58	58	58	60	71	75	72	59	56	57	56	45	64	57	64	65	63	65	72	56
6.25	56	82	48	53	44	43	39	48	54	55	72	80	59	58	61	57	58	58	65	59	62	65	74	68	58	57	58	59	53	61	60	59	62	73	76	75	65	60	60	59	48	66	59	65	66	64	67	73	63
6.5	59	86	53	55	46	46	41	52	57	59	75	83	62	61	64	61	62	62	68	62	66	68	77	72	64	60	61	62	56	64	63	62	64	75	78	77	65	63	62	62	51	68	61	69	70	67	69	77	64
6.75	63	91	57	59	51	52	46	56	62	64	79	89	67	65	68	65	66	66	71	66	70	73	82	75	66	64	64	66	60	68	68	66	69	80	81	83	69	66	66	67	54	72	65	72	73	72	74	82	69
7	66	95	59	62	57	53	50	58	64	70	83	95	70	66	69	66	67	67	73	68	72	74	83	79	71	65	65	68	61	70	70	67	70	82	84	87	72	67	67	69	56	75	67	74	75	74	77	86	73
7.25	72	101	64	66	61	58	54	62	67	73	85	99	74	70	73	71	71	72	77	71	75	78	86	82	74	70	69	72	65	74	72	71	74	84	87	90	77	71	71	73	59	78	70	79	78	77	80	88	78
7.5	73	103	64	67	61	59	55	63	69	74	87	102	76	71	74	72	72	73	79	72	77	79	87	85	78	70	69	73	66	75	74	71	73	86	87	93	78	71	71	74	60	80	71	79	80	78	81	91	79
7.75	78	108	67	71	64	63	58	66	73	77	90	106	77	73	76	75	75	76	81	74	80	83	90	89	82	73	72	75	69	78	77	75	77	87	90	96	79	74	74	77	63	82	74	83	82	82	84	94	79
8	83	112	72	74	70	66	64	71	78	82	95	111	81	77	80	78	79	80	85	78	84	87	93	93	82	76	75	78	73	81	80	78	81	92	93	101	81	77	77	80	66	87	78	86	85	85	87	99	83
8.25	88	116	74	78	73	71	67	74	79	84	97	116	86	79	82	80	81	81	87	80	84	88	95	98	89	77	77	81	74	84	83	80	82	94	96	107	87	80	80	83	69	89	80	88	87	86	89	101	89
8.5	94	123	79	81	74	73	70	76	83	88	100	119	89	83	85	83	85	85	89	83	87	91	98	101	94	81	80	84	77	88	85	83	86	95	98	109	90	83	84	85	72	92	83	92	90	89	93	106	93
8.75	96	126	80	82	74	75	73	79	86	90	103	124	92	84	85	84	86	86	92	84	88	93	99	105	93	82	81	85	79	89	86	84	86	97	99	113	91	83	84	87	72	93	84	93	91	91	94	109	95
9	99	130	83	84	75	77	75	82	89	93	106	127	93	85	87	86	88	88	93	86	90	95	101	108	97	83	82	86	79	89	88	86	87	97	100	114	93	84	85	88	73	95	86	95	93	93	97	112	95
9.25	107	137	87	88	81	82	79	85	93	97	109	133	97	90	92	90	92	92	97	90	94	100	103	113	103	87	87	90	85	94	91	90	92	101	104	118	98	90	91	92	79	100	91	98	98	97	99	117	102
9.5	110	141	91	92	85	85	81	87	96	99	112	137	101	91	93	92	95	93	98	92	97	102	106	117	106	89	88	92	87	97	93	92	94	103	106	122	99	91	93	94	81	102	92	101	100	98	101	119	103
9.75	111	143	92	93	87	86	83	90	98	101	114	141	103	90	94	92	95	94	99	92	97	103	107	121	106	89	89	92	87	97	95	93	94	103	106	126	99	92	92	94	81	103	92	102	100	100	102	121	105
10	114	147	96	95	90	90	86	95	102	104	118	146	106	93	95	94	97	96	100	95	98	105	110	125	107	91	90	94	90	99	96	95	96	105	108	131	101	94	94	96	82	104	95	104	103	102	105	125	107
10.25	118	152	100	99	92	94	89	101	107	108	121	149	112	94	98	97	101	99	102	98	101	107	112	129	112	94	93	97	93	102	99	97	98	108	109	134	105	97	96	100	85	108	99	107	105	106	107	127	110
10.5	121	155	101	102	95	95	91	102	110	109	124	152	114	97	100	99	103	100	104	99	103	109	114	133	115	96	94	99	94	104	101	99	99	109	111	137	108	98	99	102	86	109	100	109	105	106	109	129	116
10.75	123	159	104	105	97	97	94	104	111	110	126	154	118	100	102	101	104	103	107	100	104	111	115	136	118	99	96	102	96	106	103	99	101	111	112	140	112	100	101	105	89	111	102	110	108	109	111	130	121
11	126	163	107	108	100	101	97	106	113	114	131	158	122	102	104	103	106	105	109	103	106	113	118	140	124	100	98	104	98	108	105	102	103	114	115	142	116	103	103	106	91	113	103	113	110	111	113	134	125
11.25	128	165	110	112	105	104	101	111	118	120	136	162	125	103	106	105	109	108	112	105	109	116	120	146	127	102	101	106	100	111	107	105	106	117	118	147	117	105	106	108	93	116	106	115	113	114	116	137	128
11.5	130	168	114	115	106	106	102	112	119	120	138	163	126	104	107	106	111	110	112	107	110	116	122	147	128	103	101	106	102	112	107	106	107	117	118	148	118	107	106	109	94	117	107	117	114	115	117	137	128
11.75	132	170	116	116	109	108	106	113	120	123	140	165	129	106	108	107	113	112	114	108	111	119	123	150	132	105	103	109	104	114	110	108	108	120	119	149	120	108	108	111	96	120	108	118	116	117	118	139	132
12	136	175	119	120	113	113	108	115	123	126	143	167	133	108	111	111	115	114	117	110	113	121	125	153	137	108	105	112	107	116	112	109	110	122	122	153	124	111	111	114	98	122	110	121	119	120	120	142	137
12.25	137	176	124	122	114	116	110	119	127	129	145	170	134	108	111	111	118	116	119	113	116	123	129	156	137	108	106	112	108	118	113	112	112	123	122	154	123	112	112	114	99	123	112	123	119	121	122	144	136
12.5	139	179	125	124	116	120	112	120	128	132	146	172	137	110	114	114	120	117	120	115	118	124	129	158	141	110	108	114	110	119	114	113	114	124	125	157	127	115	113	116	101	125	114	124	122	123	124	146	140
12.75	141	180	126	125	115	122	113	121	128	133	147	171	138	112	114	115	119	118	120	114	117	123	129	158	143	111	110	115	110	120	115	112	113	124	124	156	128	115	115	117	102	125	115	125	122	123	124	145	143
13	143	182	129	128	118	126	117	125	132	137	150	176	140	113	116	116	122	121	123	117	120	127	131	164	146	113	111	117	112	123	117	117	116	128	127	161	129	116	115	120	104	128	116	127	125	126	127	149	145
13.25	143	184	131	130	121	129	120	126	134	139	152	177	142	114	118	118	124	123	125	119	122	128	134	165	146	114	112	118	114	124	118	118	118	129	129	163	130	118	117	120	105	130	118	129	126	127	127	151	146
13.5	147	188	134	134	123	131	123	127	135	141	153	178	146	117	121	120	125	124	126	121	123	130	135	167	150	117	115	121	117	126	121	120	119	130	130	164	134	121	120	123	108	132	120	131	127	129	129	152	151
13.75	147	189	135	134	123	133	125	129	136	143	154	180	146	117	121	120	126	125	128	122	124	131	135	169	151	117	115	120	117	127	121	121	119	131	130	166	133	120	120	124	108	133	121	131	129	130	130	153	151
14	148	190	136	135	123	135	127	130	137	144	156	181	147	118	123	123	128	127	129	123	125	131	136	169	154	119	117	123	118	128	122	122	120	133	131	167	136	122	122	126	110	135	122	133	130	131	132	155	154
14.25	150	194	139	137	126	137	128	132	139	146	157	182	150	120	123	124	130	129	131	124	126	134	138	171	156	120	118	124	121	131	124	124	121	134	132	167	137	124	123	127	112	137	124	135	131	133	133	155	156
14.5	150	194	139	137	125	138	131	133	139	147	158	183	150	120	124	124	129	129	131	125	127	134	139	172	157	120	118	124	121	130	124	124	122	134	132	169	137	123	123	128	112	136	124	135	132	133	133	156	157
14.75	153	196	142	140	129	141	134	136	143	150	160	186	152	122	126	126	133	132	134	127	130	137	141	175	159	122	120	126	124	133	127	127	126	137	135	171	139	126	126	129	114	139	126	139	134	136	135	160	159
15	156	200	144	142	129	143	135	136	143	150	161	186	155	122	128	129	135	133	135	128	130	137	142	175	162	125	123	129	125	135	128	128	126	138	136	173	142	128	128	132	116	140	128	139	136	137	136	160	162
15.25	156	201	145	143	131	145	137	138	146	152	164	188	156	124	130	130	134	134	136	130	132	140	144	178	163	126	123	131	128	135	130	129	127	139	138	174	144	128	128	133	117	142	129	140	137	138	138	162	164
15.5	158	203	147	145	133	146	139	139	146	153	164	189	158	125	130	131	137	136	137	131	134	140	144	179	165	127	124	130	129	137	130	131	128	140	138	175	144	131	130	134	119	143	130	142	137	140	139	163	164
15.75	159	205	149	146	134	148	140	140	147	154	165	190	159	127	132	132	138	136	139	131	134	142	145	180	168	128	126	133	131	138	131	132	129	140	139	176	146	131	131	136	120	145	132	143	139	140	140	163	167
16	161	206	150	148	135	149	142	142	149	155	166	191	161	126	132	133	139	138	139	132	135	142	147	182	167	129	126	133	131	139	132	133	129	142	140	177	146	132	131	137	121	145	133	144	140	141	141	165	167
16.25	161	207	150	149	134	150	143	142	149	157	167	191	161	128	133	133	139	139	140	133	135	143	147	182	169	129	127	134	132	139	132	134	130	142	140	178	147	133	132	137	121	146	133	144	140	142	141	165	168
16.5	163	209	153	151	138	152	146	144	152	159	169	194	163	128	135	135	141	141	143	135	138	145	149	184	171	131	128	136	134	141	135	136	133	145	142	180	149	134	134	140	123	148	135	146	143	144	143	168	171
16.75	165	212	154	152	139	154	147	146	154	161	171	195	166	132	137	137	144	142	144	136	140	147	151	186	174	134	131	138	137	143	137	137	134	147	143	182	152	136	136	142	126	150	137	148	145	145	145	170	174
17	165	211	155	153	140	154	148	148	154	161	171	197	165	131	136	136	144	143	144	137	140	147	151	187	173	132	130	137	136	143	136	138	134	147	144	183	151	136	135	141	125	150	137	148	146	146	145	171	172
17.25	169	215	157	155	141	157	150	148	155	164	173	197	168	133	139	140	146	144	146	138	142	148	152	188	177	134	133	141	139	145	139	139	136	148	145	183	154	139	139	143	127	152	139	150	146	148	146	171	175
17.5	170	217	159	157	142	159	151	149	156	165	174	198	169	134	141	141	147	145	148	139	143	149	153	190	178	136	134	142	141	146	140	140	137	149	146	185	156	140	139	146	129	153	140	150	148	148	148	172	177
17.75	170	217	159	157	142	159	151	150	157	164	174	198	170	134	140	142	146	145	148	140	142	149	153	189	178	136	134	141	141	146	140	140	136	149	146	186	156	139	139	145	129	153	141	150	148	149	148	173	177
18	172	220	161	159	144	161	154	152	159	167	176	201	172	137	143	143	149	148	150	142	145	153	156	192	180	138	136	144	143	149	142	142	139	152	148	188	159	142	142	147	131	156	142	152	151	151	150	175	179
18.25	173	221	163	160	146	163	156	154	161	168	177	201	173	136	143	144	149	149	151	144	146	153	156	193	181	139	137	144	144	150	143	143	140	153	149	189	158	143	141	148	132	156	143	154	151	152	151	175	179
18.5	174	222	164	161	147	163	156	155	162	169	178	203	174	137	144	145	151	151	152	145	148	154	158	195	182	139	137	145	144	150	144	145	141	154	150	190	159	144	143	149	132	157	144	155	152	153	151	177	179
18.75	173	222	163	161	148	163	156	155	163	170	179	204	173	136	144	145	151	150	153	146	148	154	159	197	181	139	136	145	144	150	145	146	141	155	151	192	158	143	142	149	132	157	144	155	152	154	152	179	179
19	176	225	165	164	149	166	159	156	164	171	180	205	176	140	146	147	153	152	155	146	150	156	159	196	185	142	140	147	148	152	146	147	143	156	152	193	162	146	145	152	135	160	146	156	155	155	154	179	184
19.25	177	227	167	165	149	167	159	157	165	172	180	204	177	141	146	148	153	153	155	147	150	156	160	197	186	142	141	148	148	153	147	147	143	157	152	193	163	147	144	152	136	159	147	157	155	156	154	180	184
19.5	178	227	168	166	150	169	161	158	166	173	182	206	178	141	147	149	154	153	156	147	150	158	161	198	186	144	141	149	149	153	148	148	143	157	153	194	164	147	146	153	136	161	147	157	156	156	155	181	185
19.75	179	229	169	168	151	170	161	159	167	174	182	207	180	142	148	150	155	155	156	148	151	159	162	198	187	144	142	150	150	154	149	149	144	158	154	195	166	148	147	154	137	161	149	158	156	157	156	182	185
20	179	230	169	168	152	172	163	161	168	174	185	209	179	143	150	151	155	155	157	150	152	160	163	201	188	145	143	151	151	155	150	150	147	160	156	197	167	148	148	154	139	163	150	159	158	159	158	183	187
20.25	182	232	173	170	154	174	164	161	170	177	186	210	182	145	151	153	159	158	159	150	154	161	164	201	190	148	145	154	154	157	151	151	148	161	158	198	170	152	149	157	140	165	151	160	160	160	159	185	190
20.5	183	234	174	173	155	175	165	163	171	177	186	210	183	146	152	154	159	159	160	152	155	162	165	202	191	149	146	155	155	157	152	153	148	161	157	198	170	152	151	158	141	166	153	161	160	161	159	186	190
20.75	182	232	172	171	154	174	166	163	171	177	187	210	182	145	152	154	157	157	159	152	155	162	166	203	190	148	145	154	154	157	152	152	148	162	158	199	169	151	149	157	140	165	152	161	160	161	159	186	189
21	184	236	176	174	157	176	167	164	172	178	187	212	184	146	154	155	160	159	161	153	156	163	166	203	193	150	147	154	156	159	153	153	150	162	159	199	171	153	152	159	142	166	153	162	162	162	160	187	191
21.25	185	237	175	174	157	177	167	164	172	179	188	212	184	148	154	156	161	160	161	154	156	163	166	204	194	151	148	156	156	159	154	153	149	163	160	200	172	155	151	160	142	167	154	162	162	163	161	187	192
21.5	186	238	178	177	159	179	169	166	175	180	190	214	186	149	155	157	162	161	163	155	158	166	168	206	195	153	149	158	159	160	156	155	151	164	161	202	174	157	153	162	144	168	156	164	163	164	162	189	194
21.75	187	237	178	177	161	179	171	167	176	181	191	215	187	150	156	158	163	162	164	157	159	166	169	208	195	152	149	158	158	162	156	157	153	165	162	204	175	156	153	162	144	169	156	164	164	165	163	190	194
22	189	240	180	179	162	181	173	169	178	183	192	217	188	151	157	159	165	163	166	158	161	168	170	208	198	154	151	159	160	162	158	158	154	167	163	205	175	159	155	164	146	171	157	166	166	168	164	192	195
22.25	190	241	181	180	163	181	173	170	178	183	192	216	190	152	158	160	166	164	165	158	161	167	171	208	198	155	152	160	161	163	158	158	154	167	163	205	176	159	155	164	146	171	158	167	166	167	164	192	196
22.5	190	242	181	181	164	183	174	172	180	185	194	219	190	153	159	160	166	166	167	160	163	169	172	211	199	156	152	161	162	165	160	159	156	169	166	207	177	159	157	165	147	173	159	167	168	169	166	195	196
22.75	190	242	181	182	164	183	174	171	179	184	194	219	190	153	159	161	167	166	167	160	162	169	172	210	199	156	152	161	162	164	160	160	155	168	165	207	177	160	156	165	147	173	159	168	168	168	165	194	197
23	193	245	184	184	166	186	177	173	181	187	195	220	193	156	162	164	169	168	170	162	165	172	174	211	203	160	156	165	165	166	162	162	158	171	168	209	181	163	160	169	150	175	161	170	170	169	168	196	201
23.25	191	244	182	183	166	184	178	175	182	187	195	221	191	154	160	163	169	168	171	163	165	172	175	214	200	158	154	163	164	166	161	162	158	172	168	211	179	161	158	168	148	174	161	170	171	171	168	197	198
23.5	195	245	185	185	169	186	180	176	184	189	197	223	194	157	163	164	171	171	172	165	167	173	177	215	203	161	156	165	166	169	164	164	160	173	170	212	181	164	160	170	151	177	163	172	173	172	169	199	200
23.75	195	246	186	186	169	188	181	176	184	189	198	224	195	157	164	166	171	170	173	166	168	174	177	215	203	161	157	166	167	169	164	164	161	174	171	212	182	163	161	171	152	177	163	172	173	173	171	199	202
Data File	J:\Service\Customer\400\411\ShID_561\data\Assays\10144\crod_SIDx6450xICC169___5_37_144_209_Marx27x2013_A_03A.oka
Set up Time	Mar 27 2013 5:31 PM
Position	3-A
Plate Type	PM05-
Strain Type	NOT APPLICABLE
Sample Number
Strain Name	Crod
Strain Number	SID_6450_ICC169
Other
Hour	A01	A02	A03	A04	A05	A06	A07	A08	A09	A10	A11	A12	B01	B02	B03	B04	B05	B06	B07	B08	B09	B10	B11	B12	C01	C02	C03	C04	C05	C06	C07	C08	C09	C10	C11	C12	D01	D02	D03	D04	D05	D06	D07	D08	D09	D10	D11	D12	E01
0	17	6	8	1	0	1	4	4	9	7	21	26	18	3	5	0	0	0	1	0	2	6	13	21	15	2	2	2	0	1	0	0	3	5	12	21	14	4	4	0	0	4	0	4	4	4	11	20	17
0.25	22	7	12	3	6	9	19	14	20	17	34	40	24	3	10	3	4	7	12	11	9	16	22	32	16	5	5	4	0	8	1	9	10	15	22	34	17	7	7	6	0	13	3	12	11	17	21	33	19
0.5	21	7	12	3	6	8	17	14	19	16	34	39	23	3	8	2	3	6	11	10	8	15	21	31	16	4	4	4	0	7	0	8	9	14	21	34	16	6	7	4	0	11	1	11	10	15	21	32	19
0.75	22	9	13	5	7	9	20	15	21	18	36	41	25	4	10	4	3	7	14	13	11	16	23	33	17	4	5	5	0	9	2	10	11	16	23	37	17	7	8	7	2	13	4	12	12	17	22	36	19
1	22	10	13	5	7	9	19	15	20	18	36	42	24	5	11	4	4	8	13	11	9	16	23	35	18	5	5	5	0	9	2	10	11	16	22	37	18	7	7	6	2	13	4	13	11	16	22	35	21
1.25	22	11	14	5	8	9	20	17	23	19	38	43	25	4	11	5	5	8	14	13	11	17	24	36	18	6	5	6	0	9	2	12	12	17	25	38	18	8	9	8	2	14	5	14	13	19	22	37	20
1.5	23	12	14	7	10	12	21	17	24	20	39	45	27	5	12	6	6	9	14	14	12	18	24	37	19	7	6	7	0	11	3	11	13	18	25	39	20	8	9	9	4	15	5	14	13	19	23	38	23
1.75	27	16	17	10	13	14	25	20	28	24	42	50	29	7	13	7	8	11	17	15	13	20	27	40	22	9	9	10	1	14	6	13	15	21	28	42	26	11	11	12	6	16	8	16	16	22	25	41	29
2	25	19	16	8	11	12	23	18	24	21	40	46	27	7	12	7	6	10	16	14	13	19	26	38	20	7	8	8	0	11	5	12	14	18	26	41	21	10	11	10	4	16	7	16	15	20	24	39	24
2.25	27	24	18	10	13	15	25	20	27	24	43	49	29	7	14	9	8	11	16	15	13	20	26	40	22	8	8	10	1	13	5	13	15	21	29	42	26	11	11	12	6	17	8	16	16	21	26	40	29
2.5	26	28	19	12	14	15	25	22	29	25	46	50	30	9	14	9	8	12	17	18	14	21	28	42	23	10	11	11	1	14	7	14	15	22	32	44	27	12	12	13	7	18	9	17	17	23	26	43	31
2.75	30	34	23	17	18	18	26	25	30	29	49	51	32	14	19	11	11	15	20	19	16	22	31	42	25	11	15	14	4	17	8	18	18	24	38	47	28	15	17	16	10	22	11	19	19	24	27	45	31
3	31	38	25	20	21	21	28	28	33	32	54	53	34	18	22	14	15	20	23	21	17	23	35	45	27	14	18	18	7	20	11	22	22	27	43	50	31	18	20	20	11	24	13	20	23	26	29	47	33
3.25	30	40	23	19	18	19	27	28	32	30	57	54	32	20	23	16	16	21	25	23	15	23	37	45	25	15	19	20	8	21	12	23	23	29	47	49	29	20	21	22	12	25	15	18	25	27	27	47	32
3.5	34	46	26	22	22	22	28	30	35	33	63	58	36	25	29	22	22	28	29	29	17	29	45	48	30	21	25	26	15	27	18	29	30	36	54	53	34	26	26	27	18	31	20	24	32	32	29	50	37
3.75	37	52	30	27	26	25	30	33	36	37	67	62	39	29	35	27	29	34	36	35	20	34	53	52	33	26	29	31	20	34	23	34	35	43	62	57	37	32	33	33	23	36	26	28	38	38	34	54	40
4	40	56	32	30	28	27	31	35	40	40	73	66	41	35	40	31	34	40	41	41	24	38	59	56	34	31	34	37	27	40	30	39	43	50	67	60	38	38	36	38	28	40	31	32	44	44	39	57	40
4.25	42	59	34	34	30	30	34	38	41	42	78	68	44	38	44	35	38	45	46	45	26	44	64	59	37	35	38	41	32	45	36	42	48	54	71	63	41	42	40	42	31	45	36	38	50	49	44	60	44
4.5	41	60	30	31	25	24	23	31	35	36	73	61	41	44	48	39	40	47	48	46	24	45	63	52	35	40	41	45	36	48	37	43	49	56	68	57	40	46	42	44	32	47	39	39	53	49	46	56	44
4.75	49	65	41	39	39	36	38	46	50	51	83	77	50	50	55	46	50	57	58	57	37	57	73	70	43	45	48	53	43	57	46	53	59	67	79	72	48	52	51	54	40	55	48	50	62	60	60	67	50
5	48	67	38	38	34	31	29	41	43	46	77	71	47	52	55	49	51	59	59	57	34	58	70	63	42	49	48	56	47	59	47	54	59	67	73	65	49	53	50	55	41	56	50	52	61	60	58	61	50
5.25	53	73	41	42	39	35	33	46	47	51	82	76	52	56	58	54	54	62	63	62	41	62	75	68	46	53	52	60	53	63	52	58	63	69	76	70	54	58	54	58	45	60	55	59	67	64	66	65	54
5.5	58	78	46	48	43	40	36	49	51	56	85	81	57	59	63	57	59	67	66	64	48	65	77	72	50	58	56	64	57	68	58	63	67	74	80	74	58	63	58	63	48	63	59	64	72	67	70	69	59
5.75	62	83	51	52	48	43	40	54	56	60	88	87	61	64	66	62	63	70	70	69	54	69	81	79	55	61	59	68	61	72	63	66	70	78	84	79	63	66	62	66	52	67	64	70	75	71	73	73	63
6	64	82	53	55	51	45	42	58	58	63	90	91	63	65	67	63	64	71	72	70	57	71	83	83	56	62	59	68	61	73	65	68	71	79	85	83	65	68	62	67	53	67	65	73	75	72	76	76	66
6.25	69	86	57	59	56	50	45	62	63	66	91	97	68	69	72	67	69	74	76	74	62	75	87	86	60	66	62	71	64	76	69	72	74	83	88	87	68	70	66	69	56	70	68	77	78	75	80	79	70
6.5	75	92	68	69	68	62	60	75	76	81	103	113	78	71	76	73	75	81	84	82	72	82	96	104	69	69	68	76	69	84	75	79	82	91	99	104	77	75	71	77	61	77	73	82	85	83	90	94	79
6.75	78	95	70	72	71	65	63	76	79	83	105	116	80	74	79	76	78	84	86	85	75	85	99	108	72	71	69	79	71	87	78	81	85	94	100	109	78	77	73	79	63	79	77	84	86	86	92	97	80
7	83	102	75	76	77	70	69	81	84	89	108	123	86	77	84	80	82	89	92	89	82	90	103	116	77	76	75	82	76	92	83	86	90	98	105	115	82	81	78	83	68	84	81	89	92	91	97	103	85
7.25	84	103	72	75	71	64	60	74	77	82	101	116	82	79	82	80	81	85	88	85	76	87	99	106	75	77	73	82	76	88	82	84	86	94	99	105	81	80	77	81	67	82	80	87	90	87	92	95	85
7.5	89	110	77	79	76	68	64	78	82	87	104	121	86	82	85	84	84	88	92	89	81	90	102	112	80	81	77	87	80	92	85	87	89	97	102	111	87	85	81	85	70	86	84	91	93	90	96	101	90
7.75	96	115	86	88	88	80	78	92	95	100	117	136	96	85	91	89	90	96	100	98	91	100	113	127	86	84	81	91	85	99	92	94	97	106	113	126	90	88	86	90	75	92	89	98	101	98	105	115	95
8	97	118	83	86	82	75	71	85	88	93	111	128	92	86	89	89	89	93	98	94	86	95	107	121	86	85	80	91	84	97	90	93	94	102	106	119	92	89	84	89	75	90	89	96	97	94	101	109	97
8.25	103	124	93	96	95	86	86	97	101	107	124	144	103	90	95	94	97	101	106	103	96	105	117	136	94	88	87	96	90	105	97	100	102	112	118	135	99	93	92	95	81	97	95	103	106	103	111	124	103
8.5	105	128	91	94	91	83	80	92	94	102	117	138	102	92	95	95	96	99	104	100	93	102	113	129	93	90	87	97	91	103	97	99	99	108	112	128	100	93	91	94	81	96	95	103	104	101	108	119	104
8.75	110	133	98	101	102	92	91	103	106	113	128	154	111	95	100	100	101	105	112	108	101	109	122	143	98	93	91	102	95	110	103	105	107	115	122	142	105	97	95	99	84	101	99	109	110	108	116	134	109
9	113	137	103	105	106	95	94	106	109	117	131	158	114	97	103	102	104	107	113	110	104	112	124	149	103	95	94	104	97	113	104	107	109	119	125	148	109	100	98	101	87	104	102	111	112	110	119	139	113
9.25	117	140	107	109	109	100	100	113	116	121	135	164	118	100	106	104	109	111	118	114	108	116	128	152	106	97	96	107	101	114	108	111	113	121	126	153	109	101	99	104	89	107	105	114	116	113	122	142	112
9.5	119	142	109	112	110	101	100	113	116	125	136	168	121	102	106	107	109	112	119	115	109	117	129	156	109	98	97	108	102	115	109	112	113	122	127	155	112	103	101	105	89	108	106	115	117	115	123	145	114
9.75	122	146	113	114	115	105	103	115	119	129	138	172	124	104	109	108	111	114	121	117	111	119	131	161	114	101	100	110	105	119	112	114	116	125	130	159	119	106	105	107	92	110	108	118	119	117	126	150	120
10	124	149	117	117	118	110	107	119	123	132	141	176	127	106	112	111	114	116	123	121	114	122	133	165	118	103	102	113	108	121	115	117	119	127	131	163	120	108	106	109	94	113	110	121	122	120	127	152	121
10.25	127	153	120	121	122	112	108	121	124	134	144	179	130	108	113	113	116	119	125	122	116	124	136	169	122	106	104	116	109	123	116	119	120	128	134	166	125	110	109	112	97	115	112	123	124	122	131	156	127
10.5	126	155	122	125	124	115	109	122	123	135	146	180	131	108	113	113	115	119	124	122	117	124	137	171	124	106	104	115	109	123	117	119	120	129	135	167	127	110	109	112	96	114	113	123	124	122	131	156	130
10.75	129	156	125	128	128	119	114	126	129	139	150	183	132	111	115	116	118	120	128	125	120	127	139	173	126	107	105	117	111	125	120	122	122	130	136	170	127	111	109	113	98	117	115	126	125	125	133	159	131
11	132	160	129	132	134	124	117	129	132	143	153	184	135	112	117	118	120	123	131	128	122	129	142	175	129	110	107	119	114	127	123	124	125	133	137	172	128	114	110	116	100	118	117	128	128	127	133	161	133
11.25	135	164	133	135	137	127	121	131	135	146	155	187	138	115	120	120	123	125	134	130	124	132	145	179	132	112	110	122	116	130	124	127	127	135	141	175	132	116	113	117	103	122	119	130	131	129	136	164	138
11.5	136	165	134	138	140	129	123	134	138	148	157	189	139	116	121	121	124	126	134	132	127	135	145	180	134	112	111	123	117	130	126	128	129	136	141	177	133	116	113	118	104	123	121	132	133	130	137	165	139
11.75	137	169	137	142	143	131	123	135	139	149	159	190	141	118	122	123	125	128	135	132	128	133	147	183	137	116	113	125	119	132	128	129	130	138	143	177	139	119	117	120	106	123	123	134	133	131	139	168	145
12	139	171	139	144	145	133	128	138	142	152	161	192	143	120	125	125	129	130	138	134	130	136	149	184	139	118	114	127	122	135	130	131	131	140	145	180	139	121	117	122	109	126	125	135	135	134	140	170	146
12.25	140	173	143	148	149	136	130	142	145	155	164	195	146	121	126	127	130	133	140	137	132	140	151	188	142	120	117	129	124	138	132	134	134	143	147	182	143	123	120	124	111	128	127	138	138	135	144	173	151
12.5	142	176	144	149	149	138	130	143	145	157	165	196	147	122	128	128	130	133	140	137	133	139	152	189	144	121	117	130	125	138	134	135	134	142	147	182	145	124	121	125	110	128	128	138	138	136	145	174	153
12.75	144	179	147	153	153	141	133	146	149	159	167	199	150	124	129	131	133	135	144	140	136	143	154	191	147	123	119	133	127	141	136	138	137	145	150	186	147	127	123	127	114	131	130	141	142	139	147	176	156
13	145	180	150	153	155	143	134	148	151	161	169	199	151	126	132	132	134	138	145	142	137	145	156	193	148	124	121	133	129	142	138	140	138	146	151	186	149	128	125	129	115	132	132	143	143	140	148	178	157
13.25	147	183	151	156	157	145	137	149	153	163	169	201	154	128	133	134	136	138	147	143	139	146	158	195	151	125	123	136	131	144	139	140	140	148	153	188	151	130	126	130	116	134	134	144	144	142	150	181	161
13.5	149	185	153	158	159	146	138	151	155	165	172	203	155	129	134	136	138	140	148	145	140	148	158	196	152	127	124	138	133	145	140	141	141	149	154	190	152	130	127	132	118	135	135	146	146	144	152	181	161
13.75	151	188	156	160	161	149	140	153	158	168	174	205	157	131	135	138	140	142	149	146	142	150	160	199	156	130	126	141	135	148	142	144	143	152	157	191	157	134	130	135	121	137	138	148	149	146	153	184	166
14	152	189	158	162	164	151	142	155	160	169	175	207	160	133	138	139	142	144	151	148	144	151	161	200	158	131	127	142	137	149	144	145	144	152	158	194	158	134	131	135	123	138	139	150	150	146	155	185	167
14.25	153	190	159	163	165	151	144	156	160	170	176	207	160	133	138	140	143	144	153	148	144	152	161	201	159	132	128	143	137	150	146	145	144	153	158	194	159	134	131	136	123	139	139	150	151	147	155	185	167
14.5	154	192	159	164	164	153	143	157	161	170	176	207	161	133	139	141	142	145	153	149	145	152	162	202	160	132	128	143	138	150	145	146	145	153	158	195	160	135	132	135	123	139	140	150	150	148	156	186	169
14.75	157	194	162	167	168	155	148	160	164	172	179	210	164	135	142	143	147	147	157	152	148	157	164	203	162	134	130	146	141	153	148	149	148	157	160	198	160	137	134	139	125	142	142	154	154	152	157	189	168
15	157	196	163	168	171	157	148	161	166	175	181	212	165	136	142	144	147	149	157	154	148	157	165	205	163	135	132	147	142	154	150	150	149	158	161	198	163	138	135	140	127	143	144	154	155	152	160	191	172
15.25	159	199	166	170	171	158	148	162	167	175	182	212	167	138	145	146	148	150	158	154	149	157	167	207	165	137	133	148	143	154	151	151	150	158	163	200	165	140	137	141	128	144	144	156	156	152	161	192	174
15.5	161	200	166	171	174	160	151	164	169	177	183	214	169	139	145	147	149	151	160	156	151	160	169	208	166	138	133	150	145	156	152	153	151	160	164	202	165	141	137	142	130	145	146	157	158	154	162	193	175
15.75	162	202	169	173	174	161	152	165	171	178	184	215	170	141	146	149	149	152	160	157	152	160	170	209	169	139	135	152	147	158	153	154	152	161	166	203	168	142	139	143	131	147	148	158	159	156	164	195	178
16	163	204	169	174	174	160	150	161	169	176	178	209	171	142	146	147	150	150	158	154	149	157	163	205	170	141	136	152	147	156	152	150	149	157	159	198	171	143	139	143	131	145	145	156	157	152	158	190	180
16.25	163	203	169	176	175	161	149	161	168	175	180	210	171	142	145	148	149	149	158	152	149	157	164	205	170	141	135	153	148	155	151	151	148	157	160	198	171	143	138	144	130	144	146	155	155	151	159	191	181
16.5	165	206	172	177	177	163	152	163	170	177	182	212	172	143	146	149	151	152	160	155	151	159	166	206	171	142	137	155	149	157	153	152	150	159	162	201	173	144	140	146	132	147	148	157	158	154	160	192	182
16.75	166	207	173	178	178	164	153	164	172	179	183	213	173	145	148	151	153	153	161	157	152	161	167	208	172	144	139	155	150	158	155	153	152	161	162	201	173	145	141	146	133	147	148	158	159	155	161	193	182
17	169	209	175	181	179	167	155	166	173	180	183	214	175	145	149	152	153	155	162	158	152	162	168	209	174	146	140	157	153	160	156	155	153	161	164	203	176	147	143	147	136	148	150	159	160	156	161	195	186
17.25	170	211	176	182	181	168	156	167	175	182	185	215	177	147	151	154	155	156	165	160	154	164	168	211	176	147	141	158	153	162	158	156	154	164	165	205	176	149	143	148	136	150	151	160	162	158	163	197	185
17.5	170	212	176	182	181	168	156	168	175	182	185	216	177	147	150	153	154	155	164	159	153	163	169	211	176	147	141	159	153	161	157	156	154	163	164	204	178	149	143	150	136	150	151	160	161	158	163	197	187
17.75	174	214	180	185	184	172	159	171	178	185	187	217	180	150	153	156	158	159	166	161	155	166	172	213	179	150	143	162	156	164	160	158	157	165	168	207	180	151	147	153	139	153	154	162	164	160	166	199	189
18	174	216	181	186	185	173	160	173	180	185	188	218	180	151	154	157	160	160	168	163	158	166	172	214	180	150	144	162	157	165	161	159	157	167	168	208	181	152	147	153	140	154	154	164	165	162	167	199	190
18.25	176	217	182	186	186	174	161	173	180	186	189	220	182	152	156	158	161	161	169	164	159	168	173	215	181	151	145	163	159	166	162	160	158	167	169	209	182	153	148	154	140	154	155	165	166	162	168	201	190
18.5	176	219	183	188	187	175	162	174	181	187	190	220	182	153	157	158	160	162	170	165	158	168	173	216	181	151	145	164	159	167	164	160	159	167	170	210	182	154	148	154	141	155	156	165	168	163	167	201	191
18.75	177	220	184	189	189	176	164	177	182	189	192	221	184	154	158	160	163	164	171	166	161	170	175	217	184	154	147	167	161	168	164	162	160	169	171	211	185	156	151	157	143	157	158	167	169	165	170	203	195
19	178	220	185	190	192	179	168	183	187	194	199	231	185	155	161	163	166	168	178	174	167	177	183	225	183	153	149	167	163	172	169	169	168	176	180	218	182	156	152	158	144	162	161	172	175	172	178	210	191
19.25	180	223	187	192	192	179	166	178	184	191	193	224	187	157	160	163	165	164	174	169	163	172	177	220	185	156	149	169	164	170	167	165	163	171	173	214	186	158	152	159	146	158	160	169	171	167	171	204	196
19.5	181	223	187	192	192	179	168	179	187	191	194	226	187	158	161	162	165	166	175	170	165	173	178	221	186	156	150	169	163	171	168	166	165	172	174	215	187	159	152	158	145	159	161	171	173	168	172	206	195
19.75	180	225	188	194	192	181	168	180	187	193	196	225	188	158	161	163	166	167	175	170	164	174	178	221	188	157	150	171	165	172	168	166	163	173	174	215	189	160	153	161	146	160	161	170	172	168	172	207	198
20	183	226	190	196	196	184	173	188	192	197	203	235	190	159	165	167	169	173	182	178	171	180	186	230	189	159	153	173	168	176	173	173	171	179	183	223	189	162	157	163	150	165	166	176	178	175	181	214	197
20.25	184	227	191	197	198	185	175	189	193	199	205	236	191	162	167	168	172	174	183	180	173	182	188	230	190	160	154	174	168	177	174	174	173	181	184	224	189	162	156	163	149	165	167	178	180	177	181	215	198
20.5	186	230	193	198	197	185	173	184	190	196	199	229	193	162	166	167	170	172	179	174	168	176	181	225	192	162	154	176	169	176	172	170	168	176	177	219	193	164	158	165	150	164	165	174	176	171	175	210	202
20.75	186	228	194	198	200	186	176	191	195	200	207	238	192	163	169	170	173	175	185	182	174	184	190	233	191	161	155	176	170	178	176	176	175	182	185	226	190	164	158	166	151	167	169	179	182	179	183	217	198
21	187	230	194	200	201	188	178	192	196	202	207	239	194	164	170	172	174	177	187	183	176	184	190	234	193	163	157	177	172	180	177	177	177	183	186	227	193	166	160	168	153	169	171	180	183	180	185	219	200
21.25	190	233	195	201	200	187	176	186	192	198	201	231	195	165	169	170	173	174	182	177	172	179	183	227	194	164	158	178	172	178	175	173	171	179	179	222	195	166	158	167	152	165	168	177	178	174	177	213	203
21.5	189	233	197	202	203	190	180	194	197	204	209	241	197	166	171	174	174	179	187	184	178	185	192	235	196	165	160	180	174	182	179	179	178	184	189	229	196	169	163	169	155	171	172	182	185	180	187	221	203
21.75	191	234	198	203	205	192	182	195	199	204	210	242	198	166	173	174	177	181	189	184	179	186	193	237	196	165	160	182	175	183	179	180	179	186	190	230	196	169	163	170	156	172	174	182	185	181	188	222	203
22	192	235	198	202	202	190	179	189	196	201	204	234	197	167	171	172	173	177	184	180	174	181	186	230	197	166	159	179	173	180	177	175	174	181	181	224	198	169	161	170	154	168	170	178	180	176	180	215	205
22.25	192	235	198	204	202	190	179	190	195	201	205	234	198	167	171	172	174	177	184	180	174	181	186	230	197	166	159	180	173	180	178	175	173	181	182	225	198	168	161	170	154	168	171	177	180	176	180	215	205
22.5	194	237	200	205	204	192	181	191	197	202	206	236	200	168	173	175	176	178	186	181	176	183	187	231	199	168	161	181	175	182	178	177	174	182	183	226	200	170	163	172	156	170	172	179	182	178	181	217	207
22.75	196	239	202	207	207	194	183	193	199	204	207	237	202	171	174	176	178	181	187	183	177	184	189	232	201	170	163	184	177	185	181	178	176	184	186	228	202	172	166	174	158	173	175	181	183	180	183	220	210
23	195	237	200	206	205	193	182	193	198	203	207	237	201	169	173	175	176	179	187	182	177	184	188	232	200	168	162	182	176	183	180	178	176	184	185	227	201	170	163	173	156	170	173	179	183	179	182	218	207
23.25	197	239	203	208	206	195	184	194	199	204	207	238	203	172	176	177	178	180	187	183	178	185	189	233	202	171	163	185	178	184	181	178	176	185	185	228	203	173	165	176	159	172	175	181	184	180	183	220	211
23.5	197	239	204	209	210	198	188	202	206	210	216	247	204	171	179	180	183	187	194	190	185	192	198	241	202	171	167	187	180	188	185	186	185	191	195	235	201	174	169	177	161	178	179	188	191	187	192	228	208
23.75	199	240	205	211	211	199	191	203	207	211	217	249	205	173	181	181	184	187	196	193	186	194	199	242	203	172	167	188	181	190	186	187	186	194	196	237	203	175	169	178	163	179	182	189	191	189	194	228	209
Data File	J:\Service\Customer\400\411\ShID_561\data\Assays\10138\crod_SIDx6450xICC169___6_37_138_209_Marx25x2013_A_03B.oka
Set up Time	Mar 25 2013 3:42 PM
Position	3-B
Plate Type	PM06-
Strain Type	NOT APPLICABLE
Sample Number
Strain Name	Crod
Strain Number	SID_6450_ICC169
Other
Hour	A01	A02	A03	A04	A05	A06	A07	A08	A09	A10	A11	A12	B01	B02	B03	B04	B05	B06	B07	B08	B09	B10	B11	B12	C01	C02	C03	C04	C05	C06	C07	C08	C09	C10	C11	C12	D01	D02	D03	D04	D05	D06	D07	D08	D09	D10	D11	D12	E01
0	19	16	10	10	9	7	7	9	10	13	17	23	14	4	0	2	3	1	0	2	3	12	13	20	12	3	0	0	0	0	0	0	1	10	8	16	9	0	0	0	0	0	0	0	0	4	6	14	10
0.25	21	18	12	14	13	17	19	21	20	27	24	32	14	5	1	6	8	12	9	14	14	26	21	33	14	5	0	0	6	2	4	9	11	25	19	26	11	3	0	0	3	0	2	0	12	17	18	27	10
0.5	22	20	13	15	14	18	20	22	21	28	25	33	15	7	3	7	10	13	11	16	15	28	23	34	14	7	2	2	8	4	6	10	13	26	20	29	13	4	1	0	5	1	5	1	14	19	19	29	12
0.75	21	19	12	15	14	17	19	21	20	26	23	33	14	6	2	6	7	12	9	15	15	27	22	31	14	6	1	0	7	2	5	10	12	26	19	28	11	3	0	0	4	1	3	0	13	17	19	29	10
1	21	19	12	16	13	17	19	22	22	28	25	33	14	5	2	6	9	13	10	15	15	29	23	32	14	7	1	1	7	3	6	9	13	26	20	29	12	3	1	0	5	1	4	0	14	18	20	30	10
1.25	21	19	12	15	14	17	19	22	21	27	26	34	15	6	2	7	8	13	10	15	15	28	23	33	14	6	1	1	7	3	5	10	14	26	20	29	13	3	1	0	5	2	5	0	14	19	20	30	10
1.5	22	20	13	16	15	18	20	22	21	27	26	35	15	8	2	7	8	13	10	15	16	28	23	34	14	7	0	2	8	3	5	10	15	25	20	30	13	4	2	0	5	2	5	2	15	19	20	31	11
1.75	24	23	16	18	16	21	23	25	24	31	30	39	17	9	5	10	10	15	12	17	18	32	26	37	15	9	3	3	9	5	8	12	17	29	22	34	14	6	4	1	8	4	8	5	19	22	23	34	13
2	24	23	16	20	18	21	25	26	25	31	30	41	18	10	6	10	11	16	13	18	19	32	27	38	17	9	4	4	10	6	10	14	17	30	22	35	16	7	4	2	8	6	9	5	19	24	24	36	14
2.25	22	22	14	18	18	21	22	24	24	31	30	39	17	8	3	8	9	14	11	16	17	29	25	36	15	8	1	2	9	4	8	11	16	28	21	32	15	5	2	0	5	4	6	3	17	22	22	35	13
2.5	23	22	15	17	25	24	23	23	24	30	29	41	18	9	3	9	9	14	12	15	18	29	25	37	16	7	2	3	9	4	10	13	16	28	22	34	16	5	4	0	6	6	7	3	19	23	23	36	14
2.75	25	25	17	20	30	29	26	25	24	31	32	44	20	11	5	12	10	15	11	17	18	30	27	39	16	9	3	4	10	5	15	14	19	29	22	34	19	8	6	2	7	11	8	5	24	24	24	37	16
3	25	26	19	24	35	35	30	29	26	33	37	46	22	14	6	12	11	16	13	17	18	31	27	40	17	9	4	5	10	6	20	16	22	32	23	35	22	8	10	6	9	17	11	8	29	30	24	38	20
3.25	27	27	19	28	39	39	36	31	26	34	41	51	23	20	7	17	11	16	14	18	20	31	28	43	18	11	4	6	11	7	25	21	28	36	25	37	25	9	15	11	10	22	17	13	34	34	25	39	26
3.5	27	28	19	31	46	45	38	35	28	35	42	55	24	24	9	21	13	17	16	18	24	32	28	43	17	11	4	8	11	7	30	24	33	40	26	38	28	9	19	14	12	27	23	18	38	40	26	39	29
3.75	27	30	21	34	51	51	40	39	30	36	43	61	28	29	12	25	13	18	19	20	28	32	29	44	17	10	5	13	12	8	36	29	37	45	29	39	31	12	25	18	15	32	29	24	42	45	27	41	33
4	28	33	24	35	54	53	44	43	30	36	46	66	30	34	15	30	13	19	24	21	32	33	30	44	18	12	6	17	12	8	39	33	41	48	31	39	34	13	27	21	19	38	35	28	46	50	27	42	33
4.25	28	36	27	34	56	56	47	43	31	37	48	70	33	38	19	33	15	22	28	23	35	34	29	45	19	13	6	23	13	9	45	38	46	52	35	40	34	15	32	24	23	44	42	32	50	54	30	44	38
4.5	28	38	28	33	60	61	52	45	32	38	50	75	34	40	21	34	13	24	30	26	39	33	29	45	19	12	5	25	12	7	48	40	48	55	36	40	36	16	35	26	26	48	45	37	53	58	31	43	40
4.75	29	45	33	37	64	64	54	50	34	39	54	81	40	46	27	41	16	27	35	29	43	33	31	48	21	15	9	32	14	11	55	46	54	60	41	41	41	21	41	30	33	54	54	43	58	64	34	46	46
5	30	48	37	41	67	71	59	57	39	42	58	87	43	51	31	44	18	31	41	33	47	36	31	50	20	18	10	37	16	13	59	50	59	64	44	44	43	23	45	34	37	58	59	49	62	68	38	48	50
5.25	29	52	39	46	73	75	60	59	40	43	61	92	47	52	34	46	19	34	44	36	52	36	31	51	20	19	11	40	16	14	63	54	62	67	45	44	45	25	47	37	40	62	64	52	65	72	40	48	53
5.5	31	58	45	52	77	78	63	64	44	45	65	97	52	56	40	51	22	38	50	40	57	37	32	54	22	22	15	46	19	17	68	57	68	71	49	46	48	30	52	42	45	67	71	57	69	78	44	52	57
5.75	32	62	49	59	81	82	68	66	48	47	71	104	57	60	44	56	26	42	54	45	61	38	35	57	23	25	18	50	20	20	72	61	72	75	51	48	52	33	57	46	49	71	77	62	74	81	48	55	61
6	31	65	51	61	85	85	71	69	51	51	75	109	60	61	47	58	28	45	57	48	65	40	36	59	23	26	20	52	22	23	75	65	76	79	54	48	53	35	57	48	52	75	81	64	78	86	51	56	62
6.25	32	69	54	65	87	87	72	70	51	50	76	112	64	64	51	61	29	46	58	50	67	37	34	58	24	29	23	54	24	25	79	66	78	80	54	46	56	38	61	51	55	79	85	67	79	88	52	56	68
6.5	33	74	59	68	92	91	75	72	53	52	81	117	67	67	53	63	32	50	62	53	71	38	35	61	25	31	26	57	25	28	82	69	83	84	57	48	60	42	63	54	59	82	90	71	82	92	56	57	71
6.75	35	80	63	72	97	96	79	77	59	57	86	124	72	70	57	68	35	54	67	58	75	42	38	65	27	34	31	63	29	34	87	74	89	88	60	51	63	45	67	58	65	87	96	77	87	96	60	61	75
7	33	81	65	72	97	98	81	79	60	57	88	127	74	69	56	68	36	56	70	59	78	43	37	66	26	35	31	64	30	36	88	75	91	90	62	51	64	45	68	58	67	89	99	78	89	98	61	62	78
7.25	36	87	69	78	104	102	85	83	64	62	92	133	80	73	61	73	39	61	73	63	81	44	40	71	28	38	36	70	33	40	93	79	96	94	65	52	68	49	72	63	72	94	105	83	92	102	65	64	82
7.5	33	89	72	80	107	106	88	85	65	64	96	137	82	73	62	74	40	62	75	64	83	45	39	72	27	39	37	71	33	42	95	80	98	94	66	53	71	48	73	65	73	97	107	84	94	103	65	66	84
7.75	35	92	76	83	110	109	91	88	67	67	99	143	86	77	65	76	42	66	77	66	85	46	42	77	28	41	40	74	36	45	98	83	102	97	68	55	75	50	76	67	76	101	110	87	96	106	68	69	88
8	36	97	81	88	114	114	95	92	72	71	105	147	93	81	68	79	45	69	80	70	90	50	45	82	30	44	43	77	40	49	103	86	106	100	71	58	79	53	79	70	80	104	116	91	101	110	71	72	93
8.25	35	100	83	91	117	117	98	95	73	73	107	151	96	83	70	80	45	71	82	73	92	52	45	84	31	45	45	80	42	50	106	88	108	103	73	58	81	54	81	72	83	106	119	93	103	112	73	74	96
8.5	38	106	88	94	122	121	102	99	76	76	113	156	101	87	74	85	49	74	85	74	95	55	49	90	33	49	47	83	44	54	110	92	112	105	76	61	87	58	85	76	87	111	124	97	106	115	76	76	101
8.75	35	106	88	96	123	122	101	99	75	76	114	157	103	85	73	84	47	74	85	75	96	55	48	92	33	48	48	82	44	53	109	92	113	106	77	61	86	57	83	75	87	112	124	97	108	116	77	76	103
9	34	110	91	98	127	124	104	101	78	78	117	160	107	87	75	85	48	76	87	78	97	56	48	96	36	49	49	84	44	55	112	94	114	108	79	63	90	59	86	76	89	115	127	99	109	118	77	78	106
9.25	37	115	97	104	134	129	108	106	82	83	123	167	114	92	81	91	52	81	93	82	102	61	53	103	40	54	54	89	50	59	118	99	120	113	83	68	96	64	90	80	94	120	132	104	114	123	82	84	112
9.5	39	121	101	107	139	134	114	111	86	88	128	171	119	94	83	93	54	84	95	86	106	64	56	108	43	57	56	91	52	62	121	101	123	115	85	72	100	66	93	83	98	124	135	107	117	125	86	87	114
9.75	37	122	102	109	143	136	117	113	89	89	130	173	121	94	84	94	54	84	96	87	108	64	57	110	43	55	56	92	52	62	121	102	125	116	86	74	102	66	95	83	99	125	136	107	117	127	86	89	114
10	37	125	105	112	147	139	119	114	89	91	133	177	125	96	86	95	55	87	98	89	110	66	58	112	46	57	58	94	52	65	123	104	126	118	88	76	105	68	97	85	102	128	140	109	120	129	88	90	119
10.25	38	129	109	116	153	142	122	118	91	92	137	180	131	100	89	99	56	90	100	92	113	68	59	115	49	62	62	96	56	67	127	108	130	121	90	79	109	71	100	88	105	130	144	112	122	131	90	92	125
10.5	39	132	112	119	157	144	125	121	94	93	140	183	137	104	90	101	57	91	102	93	115	70	60	118	52	63	63	98	58	69	129	109	132	122	91	81	114	72	103	90	107	133	147	114	125	132	92	95	126
10.75	39	136	115	123	160	149	127	124	97	96	144	186	142	108	93	103	59	93	105	96	117	71	62	122	55	65	65	100	59	70	131	112	135	125	94	85	118	75	106	92	111	136	151	116	128	136	95	99	129
11	39	141	120	125	163	151	131	126	99	99	147	188	147	111	95	107	60	97	107	99	121	73	65	124	58	67	68	103	61	74	133	115	138	127	96	90	123	77	109	95	113	139	154	118	130	137	97	104	133
11.25	41	143	123	129	166	156	136	131	105	104	152	192	150	114	98	109	63	100	112	103	124	77	68	129	61	69	71	105	64	76	136	118	141	131	100	95	126	79	110	97	117	141	159	122	135	141	101	110	137
11.5	41	146	126	130	168	157	138	133	106	105	154	193	154	117	98	111	63	100	113	104	126	78	68	130	63	71	71	108	65	78	138	119	143	132	101	96	129	80	112	100	119	143	162	122	136	142	101	113	141
11.75	41	149	128	134	171	159	140	136	108	108	159	194	156	118	101	112	64	103	116	106	126	79	69	132	66	72	72	109	65	78	140	121	145	133	102	100	132	82	114	101	121	145	164	124	137	144	104	117	146
12	42	153	133	138	174	163	145	141	111	111	164	198	160	122	104	116	66	106	118	110	129	81	72	136	71	74	76	111	68	82	144	123	148	136	105	103	136	85	118	105	125	148	167	127	140	147	106	122	150
12.25	43	157	136	142	178	167	148	143	116	115	168	200	164	125	107	119	68	108	122	112	132	84	75	139	73	77	79	114	70	84	146	126	151	139	108	106	140	88	120	108	127	151	171	129	143	150	109	126	153
12.5	43	161	140	146	182	170	152	148	119	119	172	202	167	128	109	121	70	111	124	115	135	85	77	141	77	79	80	115	72	86	148	128	154	141	109	109	144	89	123	110	130	153	174	132	145	152	110	130	157
12.75	41	161	141	148	183	172	153	148	120	120	174	202	168	128	109	121	68	112	124	115	135	85	76	142	78	79	81	117	72	86	149	128	154	141	110	109	145	90	123	112	131	154	174	132	146	152	112	129	158
13	44	166	145	155	188	176	158	153	126	125	180	205	170	132	110	124	71	115	127	120	140	88	81	147	81	81	84	119	74	88	153	132	158	144	114	114	149	92	126	114	135	158	178	136	149	156	115	135	160
13.25	43	169	147	158	189	178	160	156	129	127	183	206	172	132	112	125	72	118	129	120	142	89	81	148	83	83	85	120	74	90	154	133	160	146	115	115	151	94	127	117	136	159	180	136	151	157	116	138	164
13.5	45	173	152	163	191	181	162	160	131	130	186	208	175	136	115	128	74	120	131	122	144	91	82	150	88	86	88	123	76	92	157	135	162	148	117	118	155	98	130	120	139	161	183	139	154	160	119	140	167
13.75	44	175	154	163	193	182	164	163	133	132	187	208	176	137	115	128	74	123	132	125	146	92	83	151	88	85	88	123	77	93	158	137	163	149	118	118	157	97	131	121	141	163	184	139	155	161	120	141	167
14	43	177	154	165	194	184	164	164	136	135	189	209	177	138	116	129	75	125	133	126	147	93	82	153	90	86	90	125	77	94	160	138	165	150	119	121	159	99	132	124	142	164	185	141	157	162	121	142	169
14.25	43	181	158	167	196	187	167	168	139	137	191	210	180	142	119	133	76	128	134	129	149	94	85	155	93	90	92	127	79	96	162	140	168	152	121	123	162	101	135	128	145	166	189	143	159	164	124	145	173
14.5	42	181	159	166	196	186	167	169	141	139	193	211	181	140	119	133	77	130	135	130	150	94	85	156	95	89	92	127	78	97	163	141	169	153	122	125	162	102	135	128	146	167	189	144	159	165	126	146	173
14.75	44	183	163	170	198	190	171	173	146	141	195	213	183	143	122	137	80	133	138	132	153	96	89	159	97	92	95	130	81	100	166	143	173	156	124	127	165	105	138	133	149	170	193	146	162	167	128	149	176
15	44	188	165	172	199	190	171	175	147	144	198	214	186	146	124	140	81	135	139	134	153	98	89	160	101	94	97	132	82	101	167	145	174	157	125	128	168	109	141	136	151	172	195	147	165	170	130	152	179
15.25	45	189	167	173	202	194	175	179	152	146	200	217	186	146	125	141	82	139	141	137	157	99	92	163	103	94	99	133	83	103	169	146	176	160	129	132	170	110	143	138	153	174	196	149	166	171	131	154	179
15.5	46	191	169	175	202	194	175	179	152	146	201	217	189	149	126	143	83	141	143	137	157	100	92	164	105	98	101	135	84	104	170	148	178	161	130	133	172	112	145	140	154	175	199	150	168	173	134	155	182
15.75	45	194	170	176	203	196	177	181	154	149	203	218	191	151	129	145	85	144	144	139	159	101	93	166	108	99	102	137	85	106	172	150	179	162	131	135	174	114	146	143	156	177	202	152	170	174	134	156	184
16	46	195	172	179	205	197	179	183	156	152	205	219	192	152	130	148	86	146	146	141	161	103	95	168	110	100	105	137	86	108	173	151	181	164	133	137	176	116	149	145	158	178	204	153	171	176	137	159	186
16.25	45	195	172	179	205	198	179	183	157	152	205	219	192	151	129	148	86	148	147	142	161	103	95	168	111	100	105	137	86	107	174	151	182	165	133	137	176	117	149	145	159	179	205	152	172	176	138	159	186
16.5	46	197	176	182	207	199	181	186	161	154	207	220	195	155	133	151	88	152	150	144	163	106	97	170	116	103	108	141	87	111	176	155	186	168	135	140	179	121	152	150	162	182	208	155	175	178	141	163	189
16.75	48	201	178	184	209	202	184	190	164	157	210	223	198	158	135	155	92	155	153	147	166	107	101	174	119	106	111	142	89	113	179	156	187	170	138	143	182	124	155	153	164	183	211	157	178	181	144	165	191
17	47	202	180	185	210	204	186	190	166	158	211	224	198	158	135	156	93	158	153	148	168	108	101	175	121	105	112	142	90	115	180	157	187	171	141	145	182	124	155	154	165	184	211	158	178	182	146	166	191
17.25	48	203	181	186	210	203	186	191	166	159	212	224	199	160	137	157	93	160	154	148	168	109	101	175	124	108	114	145	90	116	180	159	190	172	140	146	184	128	158	157	166	185	214	159	180	183	147	167	194
17.5	49	206	183	188	212	205	188	193	167	160	213	225	203	161	138	161	95	163	156	151	170	110	103	177	128	109	116	146	92	119	183	160	192	173	142	147	187	130	161	160	168	187	216	161	182	184	149	170	196
17.75	48	207	184	189	213	207	190	195	170	162	215	226	203	162	139	162	96	165	158	153	172	110	104	179	130	109	118	147	92	119	184	161	192	174	144	149	188	131	162	161	169	187	217	161	182	185	151	171	196
18	48	208	186	191	214	208	191	196	171	164	216	228	204	163	142	164	98	168	159	154	173	112	105	180	133	112	119	149	94	122	185	163	194	176	146	151	189	134	164	164	171	189	220	163	185	187	153	173	199
18.25	49	209	187	192	214	209	192	198	173	166	218	228	206	165	143	166	99	169	162	156	174	113	107	182	136	113	121	150	95	123	187	164	195	178	148	153	191	136	166	166	173	191	223	165	186	188	154	175	201
18.5	50	211	189	194	217	211	194	200	175	167	219	229	207	166	144	168	101	172	163	158	177	114	110	185	140	114	123	151	95	125	189	166	197	179	149	156	193	138	167	168	174	192	224	166	188	190	157	177	202
18.75	47	210	187	193	214	209	192	199	173	167	219	229	206	165	143	167	100	172	162	157	175	113	107	183	140	114	122	150	94	125	188	165	197	178	149	155	192	137	167	168	173	192	225	165	188	189	158	177	202
19	50	212	189	195	216	211	194	201	175	169	219	229	208	167	145	170	103	175	164	159	177	116	110	185	145	116	125	153	96	128	189	167	199	180	151	157	194	141	169	170	175	194	227	166	190	192	159	178	204
19.25	49	214	191	196	217	213	197	203	177	171	221	231	210	169	147	171	104	177	166	161	180	117	111	187	147	118	127	154	97	129	191	169	200	182	153	160	197	143	171	174	177	195	229	169	190	192	162	180	206
19.5	49	215	192	199	218	214	198	204	179	172	222	232	211	170	148	174	106	179	167	162	179	118	113	188	151	118	128	155	98	131	192	170	201	184	154	161	199	144	172	175	178	196	231	169	192	193	162	182	206
19.75	49	216	193	199	219	214	198	205	180	172	223	232	211	170	149	174	107	181	168	163	181	119	113	190	154	118	129	156	98	132	192	171	201	184	155	163	199	145	173	176	178	197	232	170	193	194	164	183	208
20	48	215	194	199	219	215	200	206	182	175	224	232	211	170	148	175	109	183	169	165	182	120	114	191	155	119	129	156	99	133	194	172	203	186	158	164	200	146	174	177	179	197	232	171	195	195	166	184	208
20.25	50	217	195	201	220	216	200	207	182	176	225	234	213	173	151	178	111	185	171	167	183	122	115	192	160	121	132	158	100	135	195	175	205	186	157	166	201	149	176	180	181	199	235	172	196	197	168	186	211
20.5	51	220	198	203	221	217	201	209	184	177	225	235	215	175	152	180	113	188	173	168	184	121	117	194	164	123	134	159	102	138	196	175	205	187	160	168	204	151	178	182	182	201	237	174	197	198	169	188	212
20.75	49	219	196	202	220	217	201	209	183	178	225	233	214	174	151	180	113	188	172	167	184	122	117	193	165	121	133	158	100	136	196	174	205	187	160	168	203	151	178	181	181	200	236	173	197	197	168	188	212
21	50	220	198	204	222	219	203	210	186	180	227	235	215	176	153	182	115	190	174	169	186	123	119	196	169	124	136	160	102	139	198	177	207	189	163	170	205	153	180	184	183	202	239	175	200	199	171	190	214
21.25	49	221	199	204	222	219	203	211	186	181	227	236	215	176	154	183	116	192	175	170	187	124	119	197	172	124	135	161	102	139	199	177	207	190	164	171	206	154	181	185	183	202	239	175	199	199	172	192	215
21.5	51	224	201	207	224	221	206	214	188	183	228	237	218	180	156	186	119	195	176	173	189	126	121	198	175	126	139	163	104	141	200	179	209	191	165	173	208	157	182	188	186	205	241	177	201	201	174	193	217
21.75	50	221	200	206	222	221	205	213	188	183	229	237	216	177	155	185	119	194	176	173	189	127	122	198	176	125	139	162	103	142	200	179	210	192	167	174	208	156	183	189	185	204	241	177	202	201	176	194	217
22	52	224	202	208	224	222	207	216	190	186	230	239	219	180	158	188	124	198	179	176	191	129	125	202	181	128	142	164	106	145	202	181	211	194	169	177	211	159	186	191	187	206	243	179	205	202	177	197	219
22.25	52	226	203	210	225	224	210	217	191	186	231	239	220	182	159	190	125	200	180	176	192	130	125	203	184	129	143	165	107	146	203	182	212	195	171	177	212	161	187	193	188	207	244	180	205	204	178	198	220
22.5	54	227	205	211	226	226	212	219	193	189	232	242	222	184	160	192	128	202	182	179	194	131	128	205	186	130	144	165	108	148	205	184	214	197	176	181	213	162	188	195	190	209	245	182	207	206	182	201	220
22.75	53	225	204	210	225	224	210	218	192	188	231	240	220	182	159	192	127	202	182	177	194	131	127	204	187	129	144	165	107	148	204	183	214	197	174	180	212	162	188	195	189	207	245	181	207	205	181	200	221
23	57	229	207	212	227	226	212	220	194	191	233	242	223	185	162	195	131	204	184	181	195	134	130	207	192	131	147	168	109	151	206	185	215	198	176	183	216	165	191	198	191	210	248	183	208	207	183	202	224
23.25	58	231	208	214	230	230	216	223	196	191	235	244	224	187	162	197	134	208	186	183	198	134	132	209	195	132	148	168	110	152	208	186	216	200	180	184	216	165	192	199	193	211	248	186	210	209	186	204	223
23.5	62	230	209	215	229	229	216	223	197	193	236	244	225	188	164	198	136	209	187	184	199	135	134	210	197	133	150	170	111	154	208	187	217	201	181	186	217	168	193	201	193	212	249	186	211	209	187	206	225
23.75	65	231	209	215	228	229	216	223	196	192	234	245	224	187	164	198	137	209	187	184	199	135	133	211	199	133	150	170	111	155	208	188	217	201	181	187	217	168	193	201	193	211	251	186	211	210	187	207	226
24	67	232	210	215	229	231	217	225	197	194	236	246	225	188	165	199	139	212	188	185	201	137	134	212	202	134	152	171	112	156	210	189	218	203	183	189	218	169	195	203	194	213	251	187	213	210	188	208	227
24.25	72	233	212	216	231	232	218	226	198	195	237	246	227	189	167	202	141	213	190	187	202	138	136	214	205	136	155	172	113	158	210	190	220	204	185	191	220	171	196	205	196	214	253	188	215	211	191	210	228
24.5	76	234	213	217	231	232	219	227	198	195	237	247	228	191	167	203	143	215	190	188	201	139	137	214	208	137	155	173	114	159	211	191	219	204	186	191	222	173	198	207	196	215	254	188	215	212	191	211	229
24.75	80	235	214	218	232	234	221	227	200	196	238	248	229	192	169	205	145	217	191	189	204	141	140	216	211	139	157	175	116	161	213	193	221	206	188	193	222	174	199	208	198	216	254	190	217	213	192	213	230
25	82	235	214	218	232	233	220	228	199	197	239	248	228	190	169	205	147	217	192	189	204	141	139	217	212	138	157	174	116	162	213	193	221	206	189	194	222	174	200	209	198	216	255	190	217	214	194	214	230
25.25	86	236	215	218	232	233	221	228	199	197	238	249	230	192	171	206	149	218	193	191	204	141	141	217	214	139	160	175	116	163	213	194	221	206	190	195	223	176	201	210	198	217	256	190	218	213	194	215	232
25.5	90	237	217	219	233	235	223	230	202	198	240	250	231	193	172	209	152	221	194	193	206	142	143	220	217	140	161	176	118	165	215	195	222	208	191	196	224	177	202	212	200	218	258	192	219	216	196	217	233
25.75	93	239	218	220	234	235	224	231	203	198	240	250	232	195	174	211	154	222	195	194	207	142	145	220	219	142	162	178	119	167	215	196	222	209	193	197	225	179	204	214	201	219	259	193	220	216	197	218	234
26	97	240	219	222	236	238	227	232	204	200	242	252	233	196	174	212	156	224	197	196	209	145	147	222	221	143	164	179	121	169	217	198	225	211	196	200	226	181	205	215	201	220	258	194	220	218	199	220	235
26.25	100	241	220	222	236	238	226	233	204	200	242	253	234	196	176	213	158	226	198	197	208	146	149	223	223	143	165	179	121	170	218	198	225	211	197	201	227	181	207	217	202	221	260	195	222	218	200	221	235
26.5	103	241	221	222	237	240	228	234	206	201	244	255	233	196	176	214	160	227	199	199	212	148	151	225	224	144	166	180	122	172	218	200	226	214	198	203	228	182	208	218	203	221	260	197	223	219	202	223	235
26.75	105	242	222	223	237	239	228	234	205	202	244	254	235	197	177	216	161	227	199	199	211	147	152	225	227	145	167	181	123	174	219	201	226	213	200	203	228	184	209	219	204	222	261	197	223	219	203	223	237
27	106	240	220	222	236	239	228	233	205	201	242	255	233	195	175	214	161	228	199	200	210	147	152	224	226	143	166	179	122	172	218	199	225	213	200	203	227	183	208	218	203	221	259	196	223	219	203	224	235
27.25	108	240	220	221	236	238	226	233	205	200	242	254	233	194	176	215	162	228	199	199	211	147	152	225	227	145	167	180	122	172	219	200	225	213	200	204	227	184	209	219	203	222	260	196	223	219	203	223	236
27.5	114	243	224	224	238	241	229	236	207	203	245	257	236	198	179	218	165	231	202	203	213	151	156	227	231	148	171	183	125	177	221	202	228	215	204	207	230	188	212	222	205	224	263	198	226	221	207	227	239
27.75	115	243	223	224	239	242	231	236	208	203	245	258	236	197	179	220	166	231	202	203	215	151	157	228	232	147	170	183	126	177	222	203	228	216	205	207	231	188	212	222	206	224	262	199	226	221	207	229	238
28	118	244	225	225	239	242	231	237	208	205	246	258	237	199	180	221	168	233	203	204	215	152	159	229	233	149	173	184	127	179	222	204	228	216	206	208	232	190	214	224	206	225	264	200	227	222	208	229	240
28.25	120	244	225	225	240	244	232	238	209	204	246	259	238	199	181	222	169	234	204	206	216	152	160	231	235	149	172	185	128	179	223	205	229	217	207	210	232	191	214	225	206	225	263	200	228	223	209	231	240
28.5	125	247	228	227	243	246	236	240	212	207	249	261	240	202	184	224	172	236	206	208	219	154	165	233	238	151	176	188	130	183	225	207	231	220	211	212	234	193	217	227	210	228	265	203	230	226	212	233	242
28.75	125	246	227	227	243	246	236	240	213	207	249	261	239	201	183	225	173	236	207	209	220	155	165	233	238	151	176	187	130	184	225	207	231	220	211	213	233	193	217	227	210	228	264	204	230	226	212	233	241
29	126	246	227	226	242	246	235	240	213	207	249	262	239	200	183	225	173	237	208	209	220	156	166	234	239	151	176	187	130	184	226	207	231	221	212	213	233	193	217	227	209	227	263	203	230	226	214	233	240
29.25	129	247	228	228	242	246	234	240	213	207	249	261	241	202	185	227	176	238	207	210	219	156	167	234	240	154	178	188	131	185	226	208	232	221	212	214	234	196	219	228	210	227	265	204	232	226	215	235	244
29.5	131	248	229	229	244	248	237	242	215	209	251	263	241	203	186	228	177	240	210	212	223	158	170	236	242	154	178	189	133	188	227	210	232	223	215	216	235	197	220	229	211	229	266	206	232	227	216	237	243
29.75	131	246	228	227	242	247	236	241	214	208	250	263	239	201	185	227	177	239	208	212	222	158	169	236	242	154	179	189	133	187	227	210	233	222	215	216	234	196	219	229	210	229	265	205	233	226	217	237	243
30	134	248	230	228	243	247	236	243	214	208	251	263	241	203	187	230	179	241	210	214	222	160	172	237	243	157	181	191	134	189	228	211	233	223	216	218	236	200	222	231	211	230	268	206	234	227	218	239	245
30.25	137	252	233	231	246	251	240	245	217	212	253	266	244	205	190	232	182	243	212	216	225	161	175	239	245	158	183	193	137	191	229	212	234	225	219	220	237	203	224	234	213	232	268	208	236	230	220	241	247
30.5	137	250	232	230	245	250	239	244	218	211	253	265	242	203	188	232	182	243	212	217	225	160	174	239	246	156	183	192	136	191	230	212	234	225	219	220	236	201	223	233	212	231	266	207	235	229	220	241	245
30.75	141	254	235	232	248	253	243	247	220	213	255	267	245	207	192	235	185	246	215	219	227	164	178	241	249	160	186	195	139	194	231	216	236	226	221	223	239	205	226	235	215	232	269	210	238	231	223	243	248
31	140	251	234	231	247	252	241	246	219	212	255	267	243	205	190	234	185	245	215	219	227	163	178	241	247	158	186	195	138	194	232	214	235	226	222	223	238	204	226	235	214	232	268	210	237	231	223	243	246
31.25	144	254	235	233	248	254	243	248	220	213	256	267	245	208	192	236	188	247	216	220	228	165	179	243	250	162	188	196	141	196	233	216	236	228	222	224	240	207	228	237	215	233	269	211	239	232	225	246	249
31.5	144	253	236	232	248	253	243	248	220	213	255	266	246	208	192	237	188	247	216	220	228	165	179	242	251	161	188	197	140	197	232	216	235	227	223	224	241	208	227	237	214	233	269	209	238	232	225	245	249
31.75	146	254	237	234	249	254	244	249	222	215	256	269	246	208	193	238	190	249	218	222	230	167	182	244	251	162	189	197	141	199	233	217	237	229	224	226	240	208	229	238	216	234	269	212	240	233	227	247	249
32	149	256	238	235	251	257	246	251	224	217	258	270	248	211	195	240	194	250	220	224	231	169	185	246	253	164	192	199	143	201	235	219	238	231	227	228	242	211	231	240	217	236	271	214	242	235	229	249	251
32.25	150	256	238	235	251	257	247	252	225	217	259	270	248	210	195	241	194	251	220	225	232	169	185	247	254	164	192	200	144	201	235	219	239	230	227	228	242	212	232	240	218	236	271	214	241	235	229	250	251
32.5	152	258	240	237	253	259	248	253	225	219	259	272	249	212	197	242	196	253	221	227	234	170	188	248	255	166	195	201	146	203	236	221	240	233	228	230	243	213	233	242	220	237	271	216	243	237	231	251	252
32.75	152	256	239	236	252	257	247	252	225	218	259	271	249	211	197	243	196	252	221	227	233	171	188	247	255	166	194	202	146	204	236	220	239	232	229	229	243	214	233	242	219	237	271	215	243	236	232	252	252
33	153	256	240	235	252	257	247	252	224	218	259	271	248	211	196	243	197	253	221	228	232	171	188	248	255	167	194	201	146	204	236	221	239	232	228	230	243	214	233	242	218	236	271	215	244	236	232	252	252
33.25	153	255	239	235	251	256	246	251	225	217	259	271	247	209	195	242	197	251	220	227	233	171	188	247	253	165	194	201	146	204	235	221	239	232	229	230	241	214	232	241	218	236	269	214	243	236	232	253	251
33.5	156	256	240	236	252	257	246	252	224	218	260	271	249	212	198	244	199	252	222	228	233	173	190	249	256	169	197	204	148	205	237	223	240	233	230	231	243	217	235	243	220	237	271	215	244	236	234	254	253
33.75	156	256	241	237	253	259	248	254	227	219	261	272	248	212	198	245	200	254	224	230	235	173	192	250	256	167	197	203	149	206	238	223	240	234	231	232	244	217	236	243	220	238	270	216	245	238	234	255	252
34	159	257	241	238	253	258	248	254	227	219	260	273	250	212	199	246	202	254	224	230	234	174	192	250	257	170	199	205	150	207	237	224	240	234	232	233	245	219	236	244	220	238	271	217	245	238	235	256	254
34.25	162	261	245	240	257	262	253	256	230	223	263	275	252	216	202	249	206	258	227	234	237	176	196	252	259	172	201	207	152	210	240	226	242	236	235	236	247	222	239	247	223	240	273	219	247	240	237	259	255
34.5	160	257	242	238	255	260	251	255	229	222	262	275	249	213	199	247	205	256	226	233	237	176	195	252	257	170	200	206	152	209	239	225	242	236	234	234	244	219	236	245	222	239	271	218	247	240	237	258	253
34.75	163	259	244	239	255	260	251	257	230	223	263	275	251	215	202	249	208	258	227	234	238	178	198	253	259	172	202	208	154	211	240	227	243	237	235	237	245	222	239	248	224	240	273	219	248	241	239	261	256
35	165	261	246	241	258	263	254	258	231	224	264	275	253	218	203	252	209	259	228	236	239	178	199	255	261	174	203	210	154	213	241	227	243	237	235	237	248	224	241	249	224	241	273	221	249	241	239	261	256
35.25	166	262	247	242	260	265	255	260	234	226	266	277	254	219	204	253	211	261	231	237	242	180	201	257	261	175	205	211	156	214	243	228	245	239	238	240	248	225	241	249	225	242	273	222	249	243	241	263	256
35.5	167	261	246	241	259	265	256	259	234	227	265	278	253	217	204	252	211	260	230	238	242	180	200	257	260	174	204	210	156	214	243	228	244	239	238	240	247	225	241	250	225	242	272	222	249	243	242	263	256
35.75	167	262	246	241	258	264	254	260	233	226	265	277	253	219	205	254	213	260	230	238	240	181	201	256	261	176	206	212	157	216	242	229	244	239	238	240	249	227	243	251	225	242	273	222	250	243	242	264	257
36	169	263	248	243	260	266	256	261	235	227	265	278	254	220	206	255	215	262	231	238	242	181	202	257	261	176	207	213	159	216	243	230	245	240	239	241	250	228	243	251	226	242	273	224	250	244	243	265	257
36.25	171	264	248	244	262	267	258	263	237	230	267	279	256	222	208	258	217	263	234	240	244	184	205	259	263	179	209	215	161	219	245	232	246	242	240	243	250	230	245	253	228	244	274	225	252	246	246	267	259
36.5	171	262	247	243	260	264	255	261	234	228	266	279	254	220	207	257	217	262	232	239	242	184	204	258	262	179	209	215	161	218	243	232	245	241	240	242	250	230	245	253	227	243	274	224	252	244	245	267	258
36.75	172	264	249	244	261	266	257	262	236	229	267	279	255	222	207	258	219	263	233	241	242	184	206	259	262	180	210	216	162	219	245	232	246	242	240	243	250	231	246	254	228	244	275	225	252	244	246	269	259
37	173	262	248	243	261	267	258	262	238	230	268	280	254	221	206	257	219	262	234	241	245	185	207	261	261	179	209	215	162	219	245	232	247	243	242	245	250	230	246	254	228	244	273	226	253	246	247	269	257
37.25	174	264	249	245	262	267	258	263	238	230	268	280	255	224	209	259	221	264	235	242	244	186	209	261	263	181	211	217	164	221	246	234	247	243	243	245	251	233	247	254	229	245	275	226	254	246	248	271	259
37.5	174	262	248	243	261	265	256	262	237	230	266	279	254	223	208	259	221	263	233	242	243	185	208	259	263	181	212	217	163	220	244	233	246	242	242	244	250	232	247	255	229	244	273	225	253	245	247	270	259
37.75	178	265	250	246	264	268	259	265	240	232	269	281	257	226	210	261	224	265	236	244	245	188	211	262	264	183	213	218	166	223	247	235	248	244	244	246	252	235	249	256	230	245	275	227	254	247	250	273	260
38	176	262	249	244	262	266	257	263	239	232	268	281	254	224	209	260	224	264	235	243	245	187	210	261	262	182	213	218	165	222	246	234	246	243	243	246	250	234	248	255	229	244	274	226	254	246	249	272	259
38.25	179	264	250	246	264	269	260	264	241	233	269	282	256	226	210	261	225	265	237	244	248	188	211	263	263	182	214	219	167	223	248	235	248	244	244	248	251	234	249	256	231	246	273	228	255	247	251	274	259
38.5	178	264	249	245	263	268	258	264	241	233	269	282	254	226	209	260	226	264	236	244	247	188	212	262	261	183	214	219	167	224	246	235	248	244	245	248	251	234	248	256	231	246	272	228	255	247	251	274	258
38.75	180	264	249	245	264	269	259	264	243	234	269	282	255	226	210	261	227	265	237	245	248	189	212	263	263	184	215	219	168	224	247	236	249	245	246	249	251	235	249	256	231	246	273	228	255	247	252	275	259
39	182	265	251	246	264	268	259	265	242	235	270	282	255	228	212	263	229	266	238	246	247	191	214	264	264	187	217	222	170	226	248	237	249	245	246	249	253	238	251	258	232	247	275	229	257	249	253	276	261
39.25	182	264	251	246	264	267	258	265	242	234	270	282	255	228	212	263	230	265	238	245	247	191	214	264	263	187	217	222	170	226	248	237	249	245	246	249	253	238	251	258	233	247	275	229	256	248	253	276	262
39.5	181	263	249	245	264	268	258	265	243	235	270	282	254	227	210	262	230	265	238	246	248	191	214	263	262	185	217	221	170	226	247	236	249	245	246	249	251	237	250	257	233	247	273	229	256	248	253	277	259
39.75	183	265	250	246	265	269	259	266	244	236	270	282	255	229	213	264	231	265	239	247	248	192	215	264	263	188	219	223	173	227	248	237	250	246	247	251	253	239	252	259	234	247	274	230	258	249	254	278	261
40	185	265	251	247	265	270	260	266	245	238	272	284	255	230	212	264	232	265	240	248	251	193	217	266	263	188	219	223	174	228	249	238	252	247	249	253	252	239	251	259	235	248	273	231	258	250	256	279	260
40.25	187	266	252	249	268	272	262	268	247	239	272	285	257	232	215	267	235	267	241	250	251	195	219	267	264	190	220	225	176	230	252	240	253	249	250	254	253	241	254	261	236	250	275	232	260	251	257	280	261
40.5	189	268	254	251	269	273	264	270	249	241	274	286	259	234	216	268	237	269	243	251	253	196	220	268	265	191	222	226	177	231	253	241	253	250	251	255	254	242	254	262	237	251	276	233	260	252	259	282	261
40.75	190	269	255	251	270	273	264	270	250	242	274	286	259	235	217	268	237	269	244	252	254	197	221	269	265	192	222	227	178	232	253	241	255	251	252	256	255	242	255	262	238	251	276	235	261	253	259	282	262
41	190	268	255	251	270	274	265	270	251	243	275	287	258	236	217	268	237	269	244	252	254	197	222	269	265	192	223	227	178	233	253	242	255	251	253	257	255	243	255	262	238	251	275	235	261	254	261	283	262
41.25	192	270	256	252	272	275	266	270	252	244	275	288	260	238	218	270	240	271	246	253	255	198	223	270	266	194	224	229	179	234	254	242	254	252	252	258	256	245	256	264	239	252	276	235	261	254	260	283	263
41.5	192	269	256	252	270	274	266	270	253	244	276	287	259	237	217	269	239	270	246	253	256	198	223	270	265	193	224	228	180	233	254	242	255	251	253	258	255	244	255	263	239	252	275	235	262	254	261	284	262
41.75	195	271	256	253	272	276	268	272	254	245	277	288	261	240	220	272	242	272	247	255	257	200	225	271	266	196	226	231	182	235	255	244	256	252	254	260	257	246	257	266	240	254	276	237	263	255	262	285	264
Data File	J:\Service\Customer\400\411\ShID_561\data\Assays\10144\crod_SIDx6450xICC169___6_37_144_209_Marx27x2013_A_03B.oka
Set up Time	Mar 27 2013 5:31 PM
Position	3-B
Plate Type	PM06-
Strain Type	NOT APPLICABLE
Sample Number
Strain Name	Crod
Strain Number	SID_6450_ICC169
Other
Hour	A01	A02	A03	A04	A05	A06	A07	A08	A09	A10	A11	A12	B01	B02	B03	B04	B05	B06	B07	B08	B09	B10	B11	B12	C01	C02	C03	C04	C05	C06	C07	C08	C09	C10	C11	C12	D01	D02	D03	D04	D05	D06	D07	D08	D09	D10	D11	D12	E01
0	27	20	10	14	12	11	12	13	14	19	24	30	20	9	1	8	7	5	3	6	8	16	18	28	18	7	0	1	4	1	0	1	6	14	13	21	14	4	0	0	0	0	0	0	4	12	11	21	15
0.25	24	21	13	17	16	21	23	29	27	34	34	44	18	7	4	10	12	17	13	20	20	36	32	42	17	8	3	2	10	6	10	14	17	30	26	37	15	5	2	0	8	5	6	4	19	23	26	38	12
0.5	24	22	14	17	16	20	23	29	26	33	32	44	18	8	3	9	11	17	12	19	19	34	29	41	17	8	2	2	9	5	9	14	17	28	25	36	15	4	2	0	7	3	6	3	18	21	24	37	12
0.75	24	22	14	17	16	22	23	29	27	35	33	45	19	9	4	9	12	17	13	21	21	35	30	42	17	8	3	2	11	5	11	15	18	31	26	39	16	5	2	0	8	3	8	4	19	22	26	39	13
1	26	23	15	19	18	22	24	29	27	36	34	46	20	9	5	9	12	18	14	22	21	36	31	43	17	8	4	3	10	5	11	15	19	30	26	39	16	5	2	0	8	4	8	5	20	23	26	39	14
1.25	26	23	15	20	19	25	26	32	29	37	37	48	21	9	5	10	13	19	15	23	23	38	32	46	18	9	3	3	12	6	13	18	21	33	27	41	16	5	3	0	11	6	9	7	22	25	28	41	13
1.5	26	23	16	21	20	25	27	33	30	39	38	49	21	10	5	12	14	20	17	25	24	38	33	48	19	10	5	4	12	7	14	18	22	34	28	43	18	7	4	1	11	7	10	8	23	26	29	42	14
1.75	28	25	18	22	22	25	28	34	31	41	39	51	24	11	8	14	14	20	18	25	25	39	35	49	19	11	5	5	13	8	15	20	23	36	29	44	19	8	5	3	13	8	12	10	25	28	30	43	15
2	27	25	15	21	21	26	27	32	29	37	38	50	23	10	7	12	13	19	16	23	24	38	33	48	19	9	4	5	12	7	14	18	21	34	28	42	19	6	4	2	10	7	10	8	22	27	29	42	16
2.25	27	25	16	22	24	26	29	33	31	40	39	52	24	12	6	13	14	20	17	24	24	38	33	49	19	10	5	5	13	7	15	20	23	34	28	44	19	7	5	3	12	10	12	9	24	28	29	43	16
2.5	27	25	16	22	30	28	29	33	30	38	38	55	24	12	7	13	14	20	16	23	24	38	33	49	20	9	4	4	12	7	16	19	23	35	28	43	20	7	5	3	10	10	12	10	25	28	29	43	17
2.75	30	29	21	25	37	35	34	35	32	41	42	59	30	16	9	15	16	22	19	25	26	39	36	51	22	12	6	7	14	9	23	22	26	36	31	45	25	11	10	6	14	17	14	12	30	31	31	45	20
3	31	29	24	28	44	41	39	35	32	40	46	59	32	19	9	19	15	22	20	24	26	39	34	51	22	12	7	8	14	10	27	24	29	37	30	45	27	11	13	9	14	22	15	12	33	35	31	45	26
3.25	29	26	23	30	47	45	43	37	31	39	49	62	32	22	7	20	14	21	18	24	25	38	32	50	20	10	5	7	13	7	31	27	32	38	31	44	30	8	16	9	12	26	18	14	36	38	30	46	29
3.5	31	30	25	36	55	53	53	44	35	42	56	67	36	29	12	28	18	24	22	27	29	40	36	53	23	13	7	12	15	10	38	33	39	44	34	46	35	11	24	16	16	34	26	22	44	45	32	50	35
3.75	32	33	25	41	62	60	58	48	37	44	62	73	39	35	18	33	18	24	26	27	34	40	36	54	24	15	8	18	16	11	44	39	44	48	38	46	36	13	30	21	19	40	34	29	48	51	33	52	41
4	32	36	29	44	66	66	59	52	37	45	66	76	41	40	23	38	18	26	30	28	38	40	36	54	23	14	10	22	16	12	50	43	49	52	41	47	38	15	36	25	23	45	41	34	52	56	35	53	45
4.25	32	38	34	45	70	67	62	57	38	45	65	80	44	45	27	41	18	28	33	32	41	40	36	56	22	14	9	27	16	12	55	47	53	55	44	47	39	18	38	29	26	51	46	39	55	59	37	53	46
4.5	33	43	39	45	73	73	69	60	41	47	69	86	48	50	32	46	20	33	39	35	47	42	37	58	24	16	10	33	18	14	61	53	58	61	47	50	43	22	43	33	32	57	55	44	60	65	42	55	49
4.75	35	48	43	45	76	76	73	64	45	49	69	92	53	56	39	50	23	37	44	39	51	42	39	61	26	18	13	40	19	16	67	58	64	67	51	51	47	26	49	38	37	62	62	51	65	71	46	58	55
5	34	51	44	49	79	82	76	69	47	51	73	96	55	57	43	54	23	41	49	43	56	43	38	61	25	20	15	44	20	15	71	62	67	70	54	51	50	29	52	40	41	66	68	55	69	76	50	60	59
5.25	35	55	48	54	82	87	79	72	49	53	77	100	59	60	48	58	26	45	53	48	61	43	39	63	26	22	18	49	21	17	76	66	71	75	57	52	53	32	56	44	46	71	74	60	72	80	55	61	66
5.5	36	61	53	62	90	91	82	77	53	56	80	107	64	64	53	64	29	50	58	52	66	45	41	66	28	26	22	53	24	21	81	71	77	79	60	55	57	37	61	48	52	76	81	66	77	86	60	65	72
5.75	36	65	57	66	93	94	85	80	54	58	83	111	68	67	57	67	32	53	62	56	69	45	42	69	28	29	26	57	26	24	85	74	82	83	63	55	60	40	65	52	55	80	87	70	81	90	65	67	76
6	34	68	59	70	96	96	88	83	57	63	85	115	70	67	59	70	34	56	64	58	74	44	40	70	27	29	27	58	27	25	89	77	85	86	65	56	60	41	67	53	57	83	89	72	84	93	68	68	77
6.25	37	73	64	74	102	101	92	86	61	67	90	121	75	71	62	72	38	62	69	63	79	47	42	74	29	34	32	63	31	30	93	80	90	90	68	59	64	46	70	57	63	88	95	76	89	98	72	71	81
6.5	37	78	67	77	105	104	93	89	61	66	90	125	78	73	66	76	40	65	72	66	82	47	43	76	29	37	35	67	34	33	97	83	94	93	71	60	67	49	73	60	65	92	101	81	91	101	75	75	85
6.75	37	81	70	79	109	107	97	90	61	66	92	128	82	76	68	78	41	67	76	68	85	47	42	78	30	38	37	70	34	36	99	86	97	96	73	61	71	52	75	62	68	94	104	83	93	102	77	75	88
7	38	87	76	84	115	111	101	96	67	71	97	135	88	80	74	83	45	73	81	73	91	50	46	84	32	43	42	75	39	41	105	91	102	101	76	66	75	57	80	66	73	99	111	88	98	107	81	81	95
7.25	37	89	79	87	119	117	103	97	69	71	101	138	91	79	74	83	45	76	82	76	94	52	45	87	32	42	43	76	41	42	107	92	105	102	78	68	78	57	80	68	76	102	113	90	100	109	83	83	96
7.5	40	94	83	92	127	122	109	102	72	77	105	145	96	83	78	87	49	81	87	81	98	55	49	93	33	46	47	80	45	47	112	96	110	106	82	72	81	61	85	71	80	106	119	95	104	114	86	87	101
7.75	40	99	86	94	134	122	111	103	73	78	107	148	100	86	82	88	51	83	89	82	101	55	50	96	34	49	49	84	48	50	115	99	113	109	84	74	84	62	87	75	82	109	123	97	107	116	87	88	106
8	40	101	90	98	140	127	114	106	76	78	110	151	104	87	84	89	51	85	92	85	103	57	51	99	35	49	50	86	49	52	117	99	115	110	86	76	87	63	89	76	85	112	125	100	108	118	88	92	108
8.25	41	106	94	103	143	129	116	110	78	76	113	155	108	92	88	94	53	88	94	88	106	59	53	103	36	54	53	90	52	54	121	103	119	114	87	80	91	67	92	80	89	115	131	103	111	121	90	94	113
8.5	40	110	98	106	148	134	120	113	80	78	117	160	112	93	89	96	55	92	97	92	111	63	55	107	39	55	55	91	56	57	124	106	123	117	90	83	95	69	94	83	92	118	134	105	115	124	93	97	116
8.75	41	114	101	110	148	136	122	114	82	80	119	162	116	96	92	99	56	95	99	94	112	65	56	110	41	57	58	95	56	60	126	108	125	118	90	86	97	71	98	86	95	120	136	108	117	127	95	99	121
9	41	119	105	114	149	139	126	116	85	85	124	167	121	99	95	102	58	98	103	98	118	69	59	116	43	61	61	98	60	63	131	111	131	121	95	90	100	73	101	90	98	124	141	111	121	130	98	104	125
9.25	44	122	109	119	153	144	132	120	90	88	128	172	127	102	98	105	62	102	106	101	121	72	62	121	47	62	64	100	62	66	134	114	133	125	96	94	105	77	103	93	103	128	145	115	126	133	102	107	128
9.5	41	123	109	116	155	143	131	121	87	84	128	173	129	105	99	105	59	102	106	102	121	72	60	122	48	62	63	101	62	66	134	116	134	125	96	95	106	78	105	94	103	130	147	114	125	133	104	107	131
9.75	43	128	114	121	163	148	136	126	92	88	133	177	135	108	102	109	62	106	111	106	126	76	64	129	52	66	67	104	65	69	139	120	138	128	99	100	110	81	108	99	107	133	152	118	129	137	107	112	134
10	45	133	119	126	169	152	140	130	95	91	137	181	139	110	106	110	63	109	114	109	129	78	66	133	54	68	69	107	68	73	143	121	142	131	101	103	115	83	110	102	110	137	155	121	132	139	110	115	137
10.25	44	135	122	127	172	153	142	133	96	93	138	184	143	113	109	112	65	111	115	112	131	80	67	138	56	71	71	108	70	74	145	124	144	133	103	105	119	86	113	105	113	139	157	124	134	141	112	117	141
10.5	44	137	123	129	175	158	145	135	98	94	142	186	146	112	109	112	65	113	117	113	133	80	67	141	59	70	70	109	70	75	147	125	145	134	103	108	121	86	112	105	114	141	158	125	135	142	113	118	142
10.75	43	141	125	131	178	160	148	137	100	96	145	190	149	116	111	113	65	114	118	115	136	81	69	145	60	71	72	111	72	77	150	127	148	136	106	110	123	86	114	108	116	142	161	127	137	144	115	120	145
11	44	143	128	134	182	161	149	139	102	98	148	193	151	117	113	115	66	116	120	117	137	83	71	149	63	72	74	113	73	78	152	129	150	137	107	113	127	88	116	110	118	145	164	129	140	147	117	123	149
11.25	43	148	131	133	186	158	142	135	95	89	141	190	159	125	118	119	65	115	118	115	133	78	65	144	66	76	77	117	72	79	150	126	148	133	101	107	134	93	122	116	117	145	165	126	135	144	113	117	158
11.5	45	151	135	141	191	169	155	145	107	102	154	199	161	123	118	121	70	122	126	123	143	87	74	156	68	77	78	118	77	84	157	133	156	142	112	120	135	92	122	117	125	150	169	134	144	151	122	129	155
11.75	44	152	136	141	192	169	157	148	109	104	156	201	163	124	119	122	71	123	127	125	145	88	76	158	70	78	81	119	78	85	159	135	158	144	113	124	138	94	124	120	127	152	173	136	147	154	123	131	156
12	45	156	139	145	194	172	159	152	111	106	158	203	167	128	122	124	71	126	130	128	146	90	76	161	73	81	83	122	79	87	161	138	160	146	115	125	142	97	128	124	129	154	177	137	148	155	126	133	161
12.25	46	160	143	149	198	177	163	155	115	109	164	207	170	130	125	127	74	129	133	131	150	93	80	165	76	84	86	124	82	88	165	141	164	149	119	131	146	100	131	127	134	157	179	141	152	159	130	139	163
12.5	45	163	144	151	199	177	165	158	117	110	165	208	171	133	126	129	74	131	134	133	151	93	81	166	78	84	87	125	82	90	166	142	166	150	120	135	147	100	132	129	134	159	180	141	153	160	130	141	166
12.75	47	167	149	153	202	180	169	161	121	113	169	211	174	137	130	133	77	134	137	136	155	96	85	170	81	87	91	129	85	93	169	145	168	154	123	138	152	104	136	134	139	162	184	144	156	163	133	145	171
13	46	171	151	154	203	177	161	158	113	105	163	206	179	144	133	135	75	131	135	132	149	90	78	165	85	90	92	131	83	92	168	143	166	149	115	132	157	107	138	138	136	160	184	140	150	159	128	137	179
13.25	48	173	155	161	207	185	174	167	126	119	175	215	178	142	133	136	79	139	141	139	159	98	86	175	87	91	95	132	87	98	174	149	174	157	126	145	157	108	140	139	143	166	189	148	159	166	137	152	178
13.5	47	175	156	162	206	185	176	170	127	119	176	216	180	145	135	137	79	140	142	141	159	99	87	177	88	92	96	134	89	99	175	150	175	158	127	146	159	110	141	142	145	166	191	149	161	168	138	156	181
13.75	48	178	160	165	209	188	178	172	130	122	179	217	183	148	137	140	82	144	146	144	162	102	90	180	92	95	98	137	91	102	177	154	178	160	128	149	162	113	144	146	147	169	194	151	164	171	141	161	185
14	49	182	163	169	211	190	181	175	133	124	182	218	185	150	139	143	84	147	148	146	164	103	92	181	95	97	100	138	92	103	179	157	180	163	131	152	165	115	146	149	150	171	196	154	166	172	143	164	187
14.25	49	184	163	171	212	191	182	176	134	125	183	219	186	151	139	143	84	148	149	148	165	104	91	183	97	97	102	139	92	104	180	157	181	163	131	153	167	116	146	151	151	172	198	154	167	173	145	167	189
14.5	47	185	165	172	212	192	184	177	135	126	187	221	186	153	139	144	84	150	150	148	166	103	92	184	98	98	102	139	92	105	181	158	181	165	133	154	168	118	147	153	152	173	198	155	169	174	147	170	190
14.75	50	190	170	177	215	195	187	181	139	131	190	223	189	157	144	148	87	153	153	152	170	107	94	188	101	102	106	143	95	108	184	161	185	168	136	159	171	121	151	158	155	176	202	157	172	177	149	174	194
15	49	189	171	177	214	194	187	181	139	131	191	223	190	158	144	148	88	153	153	153	170	107	94	188	103	103	107	144	95	109	184	162	187	168	136	158	172	122	152	159	155	176	203	158	175	178	150	175	195
15.25	48	191	172	178	215	196	188	182	141	132	192	224	191	159	145	149	87	155	154	154	170	107	95	189	104	104	107	144	96	110	186	163	187	169	137	160	173	124	152	161	156	178	205	158	176	179	152	178	196
15.5	49	193	175	181	217	197	191	184	145	136	195	226	193	161	148	152	90	159	157	155	173	110	98	192	107	105	109	147	97	113	187	165	191	171	140	163	177	128	154	164	158	180	207	161	178	180	154	181	199
15.75	49	195	177	182	218	199	193	186	148	139	199	227	195	163	150	155	92	161	159	158	176	110	99	194	110	107	111	148	99	114	189	167	192	172	142	165	178	129	157	167	160	182	210	162	181	182	156	183	200
16	50	198	180	185	221	202	196	189	151	142	201	228	198	165	152	158	94	164	161	160	178	112	102	197	113	109	114	151	101	117	192	170	194	175	144	167	181	134	159	170	164	184	212	165	183	184	158	186	203
16.25	47	197	180	184	220	201	196	190	152	142	202	228	197	164	152	158	92	164	161	160	178	111	101	197	113	109	113	150	99	116	191	169	194	174	144	168	181	134	159	170	162	183	213	164	183	184	159	187	202
16.5	50	200	185	188	222	204	198	192	157	147	206	230	200	167	153	162	96	168	164	163	181	113	104	199	117	111	116	152	102	119	194	171	197	176	147	171	184	138	163	173	166	185	215	166	186	186	162	189	205
16.75	50	202	187	189	223	205	199	194	158	149	209	232	200	168	156	163	97	169	165	164	183	115	105	200	120	113	118	154	103	121	195	174	198	178	148	172	185	141	164	175	167	187	217	168	187	187	164	192	206
17	50	204	190	191	225	206	200	197	160	150	210	232	204	171	158	166	99	172	167	165	183	116	107	201	123	115	119	156	104	123	197	175	200	179	149	173	188	145	167	178	169	188	219	169	189	188	166	193	208
17.25	52	206	192	193	225	207	202	199	163	153	213	234	204	172	159	168	100	174	168	168	186	118	108	204	125	116	121	158	106	125	199	178	203	182	152	177	190	148	169	180	171	190	222	172	191	191	169	196	210
17.5	49	206	193	192	225	207	201	200	162	152	213	233	204	172	158	168	100	175	168	168	186	117	107	204	127	115	122	157	104	125	198	177	202	180	151	175	190	149	169	180	171	189	222	170	190	190	169	196	210
17.75	53	209	196	196	227	210	205	203	164	155	217	236	207	175	161	172	104	178	171	171	188	120	111	207	131	119	125	161	107	129	201	180	205	184	154	180	193	153	173	183	175	192	225	173	194	193	173	200	214
18	53	211	199	197	229	211	206	206	167	157	218	236	209	178	164	174	105	180	172	172	190	121	113	208	135	120	127	163	109	130	203	182	207	186	155	180	195	156	175	186	176	193	227	175	195	194	175	201	216
18.25	53	212	199	198	229	212	207	206	169	159	220	238	209	178	163	176	107	182	173	174	191	122	114	210	136	121	129	163	110	132	205	182	209	187	158	183	196	156	176	186	177	195	229	176	197	195	177	203	217
18.5	53	213	202	199	230	213	208	209	170	160	221	238	210	179	165	178	108	184	174	175	192	123	114	211	139	122	130	165	110	134	204	184	210	188	158	184	198	159	177	188	178	196	229	177	198	196	179	204	218
18.75	53	214	203	200	230	214	209	210	172	162	222	240	212	180	165	179	110	186	176	177	195	124	116	213	143	124	132	166	112	135	207	185	211	189	160	185	200	161	180	190	180	197	231	178	200	197	180	206	220
19	53	216	205	203	232	216	211	211	174	163	224	241	213	182	167	181	112	188	178	179	196	125	118	215	146	125	134	167	113	138	208	186	212	190	161	187	201	162	181	192	181	199	233	179	201	199	181	208	220
19.25	54	217	206	203	233	216	212	212	174	164	225	241	214	184	169	182	113	189	178	179	197	126	119	215	149	127	136	169	114	138	209	187	214	191	163	188	203	163	183	194	182	199	234	180	203	200	183	209	221
19.5	54	218	207	204	234	219	213	213	176	166	226	242	215	184	169	184	115	191	180	181	199	127	121	217	152	127	137	170	115	140	209	189	215	193	165	190	203	164	184	196	184	201	235	182	203	201	184	210	222
19.75	53	219	208	205	234	218	214	214	176	167	227	242	215	185	170	184	116	192	180	181	199	127	121	217	154	126	138	170	114	140	210	190	215	193	164	190	205	164	184	197	183	201	236	182	204	201	186	212	223
20	54	220	209	206	234	219	214	215	178	168	227	243	217	187	172	185	117	194	181	183	200	129	122	218	158	129	140	172	116	142	211	191	216	194	166	191	207	167	187	199	184	202	239	183	206	203	186	213	226
20.25	55	222	210	207	234	220	215	216	179	169	228	245	217	188	173	187	119	196	182	184	201	130	123	220	161	130	142	173	116	144	212	193	217	195	168	193	208	169	188	200	185	203	240	184	207	203	188	215	226
20.5	56	223	212	209	236	222	218	218	181	172	230	246	219	190	175	190	122	198	184	186	203	130	126	222	163	131	144	174	118	146	213	194	219	196	169	195	210	170	191	202	188	205	240	186	209	205	189	216	228
20.75	55	224	213	209	236	222	218	219	180	172	231	246	220	190	176	190	124	199	185	187	203	131	126	223	167	132	145	176	118	147	214	194	219	197	170	196	211	170	191	204	188	206	241	186	210	205	190	217	229
21	56	225	215	211	238	224	220	220	183	175	232	248	222	193	178	193	127	202	187	188	205	132	130	224	170	134	147	178	120	149	216	196	221	198	172	198	213	172	193	205	190	207	244	188	211	206	192	220	230
21.25	56	227	215	212	237	225	220	221	183	175	233	248	222	193	178	194	128	204	188	190	206	133	129	226	173	135	149	177	121	150	216	197	222	199	173	199	214	172	195	206	191	208	245	189	213	208	193	221	231
21.5	56	226	216	212	238	226	221	222	184	177	234	249	223	193	179	195	130	204	189	190	206	134	130	226	175	135	150	178	121	151	217	197	222	199	175	201	214	174	195	207	191	209	245	190	214	208	193	222	232
21.75	58	229	218	214	240	227	224	223	185	177	234	249	225	196	181	198	131	206	190	191	208	136	132	227	179	137	152	179	122	152	218	199	224	200	176	202	216	175	198	209	192	209	247	190	215	209	194	223	233
22	59	228	218	213	240	228	224	225	186	178	236	250	224	195	180	198	133	207	191	193	209	135	132	229	181	137	153	179	123	153	219	200	224	201	177	203	217	175	197	210	193	210	247	191	215	209	196	223	233
22.25	59	227	217	213	239	227	224	223	185	178	235	250	223	194	179	199	133	208	190	193	208	135	133	228	183	136	153	180	122	153	218	199	224	201	178	203	216	175	198	209	192	210	246	191	215	210	196	224	233
22.5	63	228	218	213	239	227	224	225	186	180	237	251	225	196	181	200	136	209	191	194	209	137	135	229	186	138	155	181	124	155	219	201	225	202	179	204	218	175	199	211	193	211	248	192	217	211	197	226	234
22.75	68	231	221	215	240	229	226	226	188	181	237	252	227	197	183	204	139	212	193	196	211	138	137	231	190	140	157	183	126	158	221	202	227	204	182	206	220	178	201	213	195	214	251	194	219	213	199	228	236
23	69	231	220	215	241	229	227	227	189	182	238	252	227	198	183	204	139	212	193	196	211	137	137	231	192	139	157	183	125	157	221	203	226	204	182	207	219	178	201	213	194	212	250	193	219	212	200	228	236
23.25	73	232	222	217	243	231	228	228	190	182	238	253	229	199	185	207	142	214	195	198	213	139	139	232	195	140	158	184	126	159	221	203	227	205	184	208	221	179	203	215	196	215	252	194	220	212	200	228	237
23.5	78	234	224	219	244	233	230	230	192	184	240	254	230	202	188	209	145	216	196	200	214	141	142	235	198	144	161	186	128	161	224	206	228	206	186	211	222	182	205	217	198	215	254	196	222	215	202	231	240
23.75	83	236	226	220	245	234	231	232	193	186	242	256	232	203	189	211	148	219	198	201	216	142	144	235	203	146	163	189	130	164	225	206	230	208	188	213	224	183	207	219	199	217	255	198	223	215	203	232	241
24	87	237	226	219	246	235	232	233	193	188	242	257	232	203	189	212	149	220	199	202	216	142	145	236	205	146	164	189	131	165	226	207	231	208	190	213	226	185	209	220	200	218	256	198	225	217	205	233	242
24.25	90	237	227	219	246	235	233	233	194	187	243	257	233	202	190	212	151	221	200	203	217	143	146	237	206	146	165	189	131	165	227	208	231	210	190	214	225	185	209	221	201	218	256	199	224	218	205	234	241
24.5	95	238	227	221	246	236	234	233	194	189	243	258	234	205	191	213	153	222	200	205	218	145	148	239	209	148	166	190	132	168	229	210	233	211	192	216	226	186	210	222	201	219	258	200	227	218	206	235	243
24.75	99	238	229	222	247	238	235	233	196	190	245	259	235	205	192	215	155	223	201	206	220	145	150	240	212	148	167	191	134	169	229	210	233	212	194	217	227	187	211	223	202	221	259	201	228	219	208	236	243
25	103	239	230	223	249	238	237	236	198	192	247	260	235	206	194	216	158	225	203	207	221	146	153	241	215	149	168	192	136	170	230	212	234	213	195	218	228	188	212	224	203	222	259	202	229	220	210	238	244
25.25	105	239	229	222	248	239	236	235	198	191	247	261	235	204	192	215	158	226	203	208	222	146	153	242	215	149	168	191	135	171	229	211	234	213	197	219	228	188	212	224	203	222	258	202	229	221	210	238	244
25.5	109	240	230	222	249	239	237	235	199	193	247	261	236	205	194	217	160	227	203	209	223	148	155	243	218	150	170	192	137	173	230	212	235	214	198	220	228	189	213	226	204	223	259	203	230	222	211	239	245
25.75	115	241	232	224	250	241	238	238	200	194	248	262	238	207	196	219	162	229	205	210	223	149	157	244	221	152	172	195	138	175	232	214	236	215	200	221	231	191	215	228	205	224	262	204	231	223	211	241	247
26	119	242	234	225	252	242	240	240	201	194	250	263	240	209	198	221	164	231	206	213	225	150	159	245	224	154	173	196	140	176	233	215	237	217	201	223	232	192	216	229	206	226	263	206	233	224	214	242	249
26.25	122	243	234	225	251	241	240	239	202	196	249	263	239	209	198	221	165	232	207	213	224	152	160	246	226	155	174	196	141	177	234	215	237	217	202	223	232	192	217	230	207	226	263	207	233	224	214	243	249
26.5	121	241	232	222	250	240	239	238	201	194	248	261	238	207	195	219	164	230	205	212	224	149	160	245	225	153	173	195	139	175	233	214	235	215	202	222	231	191	216	228	205	225	262	205	233	223	213	242	247
26.75	126	243	234	225	252	243	242	240	203	196	250	264	240	208	198	222	167	232	208	214	226	151	162	247	228	156	175	197	142	178	235	216	238	218	204	225	233	193	218	231	207	227	262	207	234	224	216	244	249
27	131	246	236	226	253	244	243	242	204	199	251	265	242	211	200	224	170	234	209	216	227	153	164	248	231	158	177	199	144	181	236	218	239	220	206	226	235	195	220	233	209	228	264	208	236	226	217	245	251
27.25	133	246	236	227	254	245	244	242	206	199	252	265	242	210	201	225	172	235	210	217	228	152	166	249	232	157	178	198	145	181	237	218	238	219	207	227	234	195	219	232	209	228	264	209	236	227	218	246	250
27.5	136	247	237	227	254	245	244	243	206	199	252	266	243	212	202	226	173	236	210	217	228	155	167	249	234	160	179	201	146	183	238	219	240	221	208	227	236	197	221	234	210	229	266	209	238	227	219	247	251
27.75	138	247	238	227	254	246	245	243	206	200	253	266	243	212	202	227	174	237	211	218	230	155	168	251	235	161	180	201	147	184	238	219	239	221	209	229	236	198	222	234	210	230	266	210	238	228	221	248	252
28	140	246	237	227	256	246	246	243	207	200	253	266	243	210	201	227	175	237	211	219	230	154	169	251	236	160	179	200	147	185	238	220	239	221	210	229	235	197	222	233	210	231	265	210	237	228	221	248	251
28.25	145	250	240	229	257	247	248	246	209	203	255	268	246	214	205	230	178	239	213	222	231	158	172	253	239	163	183	204	150	187	241	222	241	223	211	231	238	200	225	236	213	232	268	212	239	229	223	250	254
28.5	145	248	238	228	256	247	247	244	209	204	255	268	244	212	203	229	178	239	213	222	232	157	172	253	238	162	182	202	150	187	240	221	241	223	213	231	236	199	224	235	212	232	267	212	240	230	224	251	253
28.75	146	248	238	227	255	247	247	245	210	203	256	267	245	212	203	229	178	239	213	222	232	157	172	253	239	162	182	202	149	187	240	221	241	223	213	231	237	199	223	236	211	232	266	212	239	230	224	250	253
29	151	250	242	230	258	249	250	247	211	206	257	268	247	214	206	232	181	241	215	224	233	159	176	255	243	165	185	205	153	190	243	223	242	225	215	233	239	202	226	238	214	233	269	214	241	231	226	252	255
29.25	153	251	243	231	259	251	251	248	213	207	258	269	248	215	207	233	183	243	216	226	235	161	178	256	244	166	186	206	154	191	243	224	243	226	217	235	240	203	227	239	215	235	268	215	242	233	228	254	256
29.5	155	252	243	230	259	251	251	249	212	208	257	269	248	215	207	234	185	243	216	226	235	161	178	257	246	166	187	206	155	192	244	225	242	226	218	235	240	204	228	240	215	235	270	215	242	232	228	254	256
29.75	155	251	242	231	260	252	252	249	214	208	259	270	247	214	207	234	185	244	217	227	236	161	179	257	245	167	187	206	156	193	244	225	243	226	219	235	239	203	228	240	215	236	269	215	242	233	229	255	255
30	160	254	246	233	262	253	254	251	215	210	261	271	251	218	210	237	188	246	220	230	238	164	182	259	249	169	190	209	158	196	246	228	245	228	221	237	242	207	230	242	217	237	271	217	245	234	231	257	258
30.25	160	253	245	232	262	252	254	251	215	211	260	270	250	217	209	237	189	246	219	230	237	163	182	259	249	169	190	209	159	196	246	227	244	228	221	238	242	207	231	242	217	237	271	217	244	234	231	257	258
30.5	162	254	246	232	262	253	254	252	216	212	261	271	251	217	210	238	190	247	219	230	238	164	185	260	250	170	191	209	159	197	246	228	245	230	222	239	243	208	232	243	217	238	271	218	245	235	233	259	258
30.75	163	255	247	234	262	253	256	253	217	213	262	272	251	218	211	239	192	247	220	231	238	164	185	261	250	172	192	211	160	198	248	229	245	230	223	240	243	209	233	245	218	238	271	218	245	236	233	259	259
31	165	254	247	233	262	254	255	253	218	213	261	272	252	218	211	239	193	248	220	232	239	166	186	261	251	173	193	211	161	199	248	229	246	231	224	240	244	210	233	245	218	239	272	219	246	237	234	260	260
31.25	166	255	246	233	263	254	255	254	218	213	261	272	252	218	212	240	194	249	221	233	239	165	186	262	252	173	193	212	162	199	248	230	246	230	224	240	244	210	233	245	218	240	271	220	246	236	235	261	260
31.5	168	256	248	234	264	256	257	254	219	216	263	273	253	219	213	242	196	250	222	233	240	166	189	263	253	174	194	212	164	201	249	231	246	232	226	242	246	212	234	245	219	240	272	220	246	237	236	261	261
31.75	169	257	249	236	265	256	258	255	221	217	264	275	253	220	214	243	198	250	223	235	241	168	190	264	254	174	195	213	165	202	251	231	247	232	227	244	245	212	235	247	220	241	272	222	248	238	238	263	261
32	172	257	249	236	265	257	259	256	221	218	264	274	254	221	214	244	199	252	224	237	242	169	192	264	256	177	196	215	167	203	251	233	247	233	228	244	246	214	236	247	221	242	273	222	249	240	238	264	262
32.25	172	257	249	236	265	258	260	256	221	218	264	274	253	220	214	244	201	252	224	236	242	168	193	264	255	176	196	214	167	204	251	232	247	233	228	244	245	213	236	248	221	242	272	223	248	239	239	264	261
32.5	173	258	249	236	265	257	260	256	223	219	265	275	254	220	215	245	202	252	225	238	244	170	193	266	255	176	198	214	168	205	252	233	248	234	230	245	245	214	238	248	222	243	272	223	250	240	240	265	262
32.75	176	260	252	238	268	258	261	258	223	221	266	276	256	223	218	248	204	254	226	239	244	172	196	267	257	180	200	218	171	206	253	235	250	235	231	247	248	217	239	251	223	243	274	225	250	241	241	267	264
33	178	260	252	238	268	259	262	259	225	222	266	276	256	224	218	248	206	254	227	240	245	172	197	268	257	180	200	218	171	208	254	235	250	236	232	248	248	217	240	251	224	244	274	226	251	241	242	267	264
33.25	178	261	253	239	267	259	261	260	224	222	266	276	257	224	219	249	207	255	227	240	245	173	198	267	258	181	202	219	172	208	254	236	250	236	233	248	250	218	241	252	224	244	275	225	252	241	243	269	265
33.5	179	261	253	239	268	259	262	260	225	223	267	276	257	225	219	250	209	256	228	241	246	173	198	268	259	182	203	220	173	208	255	237	250	237	232	248	250	219	241	252	224	245	274	226	251	242	243	268	265
33.75	182	262	254	240	269	261	264	261	226	225	268	277	258	226	220	252	210	257	229	242	247	175	200	269	260	184	204	220	174	210	257	238	251	238	234	250	250	220	242	254	225	245	275	227	253	243	245	270	266
34	182	260	253	239	268	261	264	261	227	225	268	279	257	225	219	251	211	256	229	242	247	175	201	270	259	183	203	220	176	211	256	237	251	239	234	250	249	220	242	253	225	246	274	228	253	243	245	270	265
34.25	182	261	252	239	269	261	264	261	227	226	269	277	257	225	219	251	211	257	229	242	247	175	201	270	259	183	204	220	176	210	256	237	250	239	235	251	249	220	242	253	226	246	273	227	253	243	246	270	264
34.5	185	263	254	241	270	262	265	263	229	228	269	278	259	227	221	254	214	259	231	244	249	176	203	270	262	185	205	222	177	213	258	239	252	239	236	253	251	222	244	255	227	248	275	229	254	245	247	273	266
34.75	185	262	253	240	271	262	265	262	229	227	269	278	258	227	221	253	215	259	230	244	249	176	203	271	260	185	206	222	177	213	257	239	251	239	236	252	250	222	244	254	227	247	274	229	254	244	247	272	265
35	188	264	257	242	272	264	266	265	230	229	270	279	260	230	224	256	217	260	232	246	250	178	206	272	262	188	208	225	180	215	259	240	253	241	237	255	253	224	246	257	229	248	276	231	256	245	249	274	268
35.25	189	265	256	243	273	264	267	265	231	230	271	279	260	230	224	257	218	261	233	246	251	178	207	272	262	189	208	225	181	215	259	241	253	241	238	255	253	224	247	257	229	250	276	230	256	246	250	274	268
35.5	190	265	257	243	273	264	267	265	232	230	271	280	260	230	224	257	219	260	232	247	251	178	208	272	262	189	209	225	182	217	259	241	253	241	238	255	253	224	247	258	229	249	275	231	256	246	250	275	268
35.75	189	262	254	241	270	263	266	263	231	230	270	280	258	228	222	255	218	260	232	246	251	179	207	272	260	187	208	223	182	216	258	240	253	241	238	255	251	223	246	256	229	248	273	231	255	246	250	275	266
36	191	264	256	243	272	264	268	264	232	232	272	281	260	230	224	257	221	261	234	248	252	180	209	274	262	189	210	225	183	217	261	241	254	242	240	256	252	225	247	258	230	250	275	232	257	247	252	276	268
36.25	193	264	256	244	273	265	268	265	233	233	272	281	259	230	224	258	222	261	234	248	253	180	210	274	262	191	211	226	185	218	260	242	254	243	240	257	252	226	248	259	231	250	274	232	257	247	253	276	267
36.5	193	264	256	243	273	265	269	266	234	233	272	281	259	230	224	258	223	262	235	248	253	181	210	274	262	190	211	226	185	218	260	242	255	243	241	258	252	227	249	259	231	251	274	233	258	248	253	276	267
36.75	196	267	259	246	274	267	271	268	235	235	273	282	261	233	227	261	226	264	236	251	254	182	212	275	264	194	213	229	187	220	262	245	256	244	242	260	254	229	250	261	233	252	276	234	259	250	255	278	270
37	196	266	259	246	275	267	271	268	237	235	274	282	261	233	227	261	227	263	237	251	256	182	213	276	263	193	213	228	188	221	263	244	257	245	243	261	254	228	251	261	233	253	275	234	259	250	256	278	269
37.25	199	268	260	248	276	268	272	269	237	237	275	283	263	235	229	263	229	265	238	253	256	184	215	276	264	196	215	231	190	222	264	246	258	246	244	262	256	230	252	263	235	254	277	236	261	251	257	280	271
37.5	200	269	261	248	277	268	272	270	238	238	275	283	264	237	231	264	230	265	239	253	257	184	217	277	265	196	217	232	191	223	265	246	258	246	244	262	256	232	254	263	235	254	277	237	261	251	257	281	271
37.75	200	268	260	247	277	268	272	269	238	239	275	283	263	236	230	264	230	265	239	253	257	184	216	277	265	196	217	230	190	223	265	246	257	246	245	263	255	231	253	263	235	254	277	236	261	251	258	281	270
38	201	268	259	247	275	268	272	269	238	239	276	283	262	235	230	263	230	265	238	253	257	185	217	277	264	197	217	231	192	224	264	246	259	246	245	262	256	231	254	262	235	255	276	236	261	251	259	281	270
38.25	203	269	262	248	278	269	273	271	239	240	276	284	263	238	232	265	233	266	240	255	259	186	219	278	266	199	218	233	194	226	266	248	259	247	246	263	257	234	255	265	236	256	278	237	263	252	260	281	272
38.5	204	270	263	250	279	270	274	273	240	241	277	284	264	240	233	267	234	267	240	256	259	186	219	279	266	201	219	234	195	226	266	247	259	247	247	264	258	234	256	265	238	256	279	238	263	252	261	282	273
38.75	205	269	263	250	278	270	274	272	241	242	277	284	264	240	233	267	236	267	241	256	259	187	220	279	265	201	220	234	196	227	267	248	260	248	247	265	256	236	256	266	238	256	278	239	263	253	261	283	273
39	205	269	262	249	277	269	273	272	241	242	276	283	263	238	232	266	234	266	240	255	259	186	219	278	265	200	219	233	196	226	266	248	259	247	248	265	257	234	255	264	237	256	276	237	263	252	261	283	271
39.25	207	270	263	251	279	270	275	274	242	244	278	285	264	241	234	268	237	268	242	257	261	188	222	279	266	201	221	235	199	229	267	250	260	248	248	267	257	236	257	266	239	257	278	240	264	254	262	284	273
39.5	209	271	265	252	280	272	276	274	243	245	278	285	265	242	236	270	239	269	243	258	261	188	223	280	267	203	223	237	200	229	268	250	260	249	249	267	258	238	259	267	240	258	278	240	266	255	264	285	274
39.75	209	272	264	251	280	271	276	274	243	245	279	285	264	242	235	269	239	268	243	258	261	189	223	280	267	203	223	237	200	229	268	250	261	249	250	267	258	238	258	267	240	258	278	240	265	254	264	285	273
40	210	272	265	252	280	272	277	275	245	246	279	286	266	243	237	270	240	269	244	259	262	191	224	281	267	205	223	238	201	230	269	251	262	249	250	268	258	239	259	268	241	259	279	241	266	256	264	286	274
40.25	210	270	264	251	279	271	276	273	244	245	279	285	264	241	236	269	240	268	243	257	262	189	223	280	266	203	223	236	201	229	268	250	260	249	250	268	257	238	258	266	240	258	276	240	265	255	264	286	273
40.5	212	271	265	253	281	272	278	275	245	247	280	286	265	243	237	271	241	269	245	259	263	190	225	282	267	205	225	238	203	231	269	252	261	250	251	270	258	239	259	269	242	259	277	242	265	255	266	286	274
40.75	214	273	266	253	281	272	278	276	246	249	280	286	266	246	239	272	244	270	246	260	263	191	227	282	268	207	226	240	204	232	270	253	263	251	252	270	260	242	260	270	242	260	279	241	266	257	266	287	275
41	215	273	267	255	282	273	279	277	248	250	282	287	267	246	240	273	245	271	246	262	265	192	228	283	268	208	226	240	206	233	271	254	263	252	253	271	260	242	261	270	244	261	279	243	268	257	268	288	275
41.25	214	272	266	254	281	273	278	275	246	249	281	286	265	244	237	271	244	269	245	260	264	191	227	282	266	207	225	239	205	232	270	252	262	250	252	270	259	240	260	269	242	260	277	241	266	256	267	287	274
41.5	216	272	267	254	281	273	279	276	247	250	280	287	266	246	239	273	245	270	246	261	264	193	228	283	267	208	227	241	207	233	271	253	263	252	252	271	259	242	262	271	244	261	279	243	268	257	268	288	276
41.75	218	273	267	255	282	273	279	276	249	251	282	288	266	247	240	273	246	271	247	262	265	193	229	283	267	210	228	241	208	234	271	254	264	253	254	272	259	242	262	271	244	261	279	244	268	258	268	290	275
Data File	J:\Service\Customer\400\411\ShID_561\data\Assays\10138\crod_SIDx6450xICC169___7_37_138_209_Marx25x2013_A_04A.oka
Set up Time	Mar 25 2013 3:42 PM
Position	4-A
Plate Type	PM07-
Strain Type	NOT APPLICABLE
Sample Number
Strain Name	Crod
Strain Number	SID_6450_ICC169
Other
Hour	A01	A02	A03	A04	A05	A06	A07	A08	A09	A10	A11	A12	B01	B02	B03	B04	B05	B06	B07	B08	B09	B10	B11	B12	C01	C02	C03	C04	C05	C06	C07	C08	C09	C10	C11	C12	D01	D02	D03	D04	D05	D06	D07	D08	D09	D10	D11	D12	E01
0	16	5	2	0	0	0	0	0	1	1	13	18	14	0	0	0	0	0	0	0	0	0	8	14	12	0	0	0	0	0	0	0	0	0	7	22	12	0	0	0	0	0	0	0	0	4	6	13	16
0.25	29	13	19	15	14	16	26	20	27	20	40	46	33	7	14	13	13	13	20	16	12	20	25	37	27	11	9	13	11	15	6	16	15	21	25	45	31	14	13	15	10	18	8	20	17	24	27	41	35
0.5	25	8	12	9	5	7	14	10	16	12	30	34	28	5	8	7	5	5	9	8	5	12	18	28	23	6	5	8	3	7	0	8	7	12	18	33	27	12	10	9	5	11	2	11	10	15	20	32	31
0.75	23	7	9	7	4	5	13	9	15	10	29	34	26	3	6	5	3	3	9	7	4	11	16	28	20	5	4	6	0	5	0	7	6	11	17	33	25	8	7	9	2	10	1	10	9	15	19	32	30
1	25	7	10	8	4	6	13	9	15	10	29	33	28	3	7	5	3	3	8	7	4	11	17	27	23	6	5	7	1	6	0	7	7	11	16	32	27	10	8	9	4	10	2	10	9	14	19	31	33
1.25	24	7	9	7	3	5	13	9	14	9	28	32	26	4	7	5	2	3	9	6	3	9	17	28	22	6	4	6	0	6	0	7	7	11	18	32	27	9	8	9	3	10	2	11	9	15	20	32	32
1.5	25	8	10	8	4	6	14	10	15	11	29	33	26	3	7	6	3	3	10	8	4	10	18	29	21	5	5	5	0	7	0	8	8	12	18	34	26	10	8	9	4	11	3	11	10	15	21	32	31
1.75	27	11	12	10	7	7	16	11	16	12	29	34	30	5	9	8	5	5	10	9	6	12	19	30	26	8	7	9	3	8	1	8	9	14	19	35	31	13	11	11	6	12	4	12	12	16	21	35	35
2	24	9	11	8	6	7	16	12	19	12	32	37	22	3	8	8	6	5	14	12	8	15	21	33	17	6	7	7	0	9	2	11	12	14	21	37	23	10	9	10	4	14	5	15	12	18	23	38	27
2.25	23	8	11	8	6	5	17	13	17	13	33	36	23	3	7	7	4	4	12	11	7	14	19	33	17	5	6	7	0	8	2	10	10	14	20	35	26	11	7	11	3	13	5	12	11	17	22	37	31
2.5	26	9	10	9	4	3	14	10	12	9	29	31	26	0	7	6	2	2	9	8	5	11	18	29	22	7	5	7	1	7	1	7	8	11	17	32	33	14	9	11	5	11	3	12	10	15	21	34	38
2.75	25	9	12	8	6	6	17	12	16	12	33	36	24	2	9	7	4	5	13	12	8	14	21	33	20	6	7	7	0	10	2	11	12	15	21	36	27	12	9	14	5	15	6	15	13	19	24	38	32
3	28	12	14	12	8	7	19	13	17	14	34	36	28	4	10	10	6	5	14	13	9	16	21	33	23	9	9	9	4	13	3	11	14	15	21	36	33	17	11	18	8	19	6	14	13	20	26	39	40
3.25	26	13	13	11	7	5	16	11	15	10	31	34	29	4	9	9	4	5	15	16	9	14	19	32	24	9	9	10	4	14	3	10	16	15	20	35	35	20	11	22	10	22	7	14	14	22	28	39	42
3.5	28	14	16	14	10	8	20	14	18	14	35	36	31	4	9	11	7	6	18	21	12	18	21	34	26	10	10	11	5	17	4	11	20	18	22	37	37	22	12	26	13	27	8	16	16	26	31	40	45
3.75	28	14	15	12	9	8	21	14	19	13	35	38	30	4	10	11	5	7	23	26	17	24	23	36	25	9	11	10	5	20	4	13	25	22	23	39	36	24	12	30	16	32	11	17	21	30	36	42	45
4	25	13	16	9	8	6	20	14	18	13	34	37	26	3	9	9	4	6	26	30	20	26	23	36	20	8	9	8	3	23	4	13	30	25	23	38	33	25	10	32	19	35	13	17	22	33	39	42	42
4.25	25	17	17	11	9	7	22	14	18	13	35	37	28	4	10	10	6	7	30	36	24	32	25	38	23	10	10	10	4	28	6	14	36	30	25	40	38	29	12	37	24	41	16	19	27	38	45	44	47
4.5	27	21	17	12	9	7	22	14	17	12	35	36	30	4	10	10	5	6	32	39	27	35	25	37	26	10	10	10	4	30	6	13	38	33	24	39	45	33	12	40	26	43	18	18	28	41	48	44	54
4.75	27	24	17	11	9	7	21	13	17	12	34	35	30	4	10	11	5	6	35	45	32	40	27	38	25	11	12	11	6	34	6	14	43	37	25	40	48	38	13	44	31	51	22	18	33	44	53	45	57
5	28	28	16	12	6	4	20	11	14	10	30	32	33	4	8	11	3	5	36	47	35	43	29	35	27	11	11	11	6	34	5	12	44	40	23	38	54	41	13	45	34	53	23	17	33	46	53	43	63
5.25	31	31	19	16	10	10	27	15	19	15	37	37	35	4	9	12	5	7	42	54	40	49	34	39	29	13	12	12	9	37	6	14	48	44	25	41	58	43	14	49	39	57	26	18	36	52	58	45	67
5.5	31	37	21	15	13	10	29	17	20	16	39	38	34	5	10	14	8	8	47	59	44	53	38	40	29	13	14	14	12	41	8	16	52	49	27	42	60	47	16	51	44	63	31	21	40	56	62	47	70
5.75	32	41	23	16	14	11	31	18	21	18	40	40	35	6	12	14	9	9	51	63	48	57	41	42	29	14	15	14	15	44	9	17	55	52	28	43	64	49	16	55	48	65	34	22	42	59	64	47	74
6	32	46	26	18	15	12	33	20	22	18	41	40	38	7	12	16	9	11	54	66	51	61	44	42	31	15	16	15	17	45	10	18	58	55	30	44	69	51	16	58	51	69	38	22	44	62	67	49	78
6.25	28	48	25	13	11	9	31	18	20	15	39	39	33	5	11	12	7	8	57	71	54	64	47	42	25	12	15	13	18	47	9	17	60	57	28	43	66	51	13	58	53	71	41	21	45	64	68	49	76
6.5	29	53	25	14	10	9	31	17	19	14	37	37	35	5	11	13	7	9	58	74	56	67	49	42	27	14	16	13	21	49	9	18	61	59	28	42	73	54	14	60	56	75	45	22	46	65	70	49	82
6.75	33	60	30	18	15	11	35	19	22	18	40	40	40	7	13	16	10	10	63	77	61	70	53	44	32	17	18	16	25	52	12	19	65	63	29	45	80	57	18	64	59	78	46	23	49	70	74	51	89
7	32	62	31	18	14	11	36	19	20	17	39	37	40	7	11	15	8	9	64	79	63	73	55	44	31	17	18	16	27	52	13	18	65	64	29	44	83	58	16	65	61	80	49	22	50	71	75	52	93
7.25	34	67	33	19	13	10	38	19	20	17	37	37	42	8	12	15	8	9	67	81	66	75	57	45	34	20	20	17	30	55	13	18	68	66	30	44	87	62	17	68	64	82	52	23	51	73	77	51	98
7.5	32	69	34	16	12	9	38	17	19	14	37	36	39	5	11	13	6	8	68	83	68	78	59	45	30	19	19	15	30	55	14	18	69	68	30	43	87	61	15	68	64	84	55	22	52	74	79	52	100
7.75	33	74	39	19	15	11	43	21	22	18	40	38	40	6	12	16	9	9	72	86	72	82	62	49	32	22	21	18	34	59	18	20	71	71	33	45	90	65	17	71	68	87	57	24	55	77	82	54	104
8	33	77	42	19	17	13	48	23	23	19	42	40	42	8	14	17	10	11	75	90	76	87	64	52	33	25	24	19	37	62	20	21	74	74	36	46	92	66	18	74	71	92	61	25	57	79	84	56	108
8.25	34	81	44	20	16	12	48	22	21	16	40	38	44	7	13	16	9	10	76	91	78	87	65	53	35	27	24	21	38	62	21	21	73	75	37	45	97	68	19	75	72	94	62	25	57	80	85	55	113
8.5	34	85	47	20	15	11	50	21	21	17	38	38	45	8	13	17	9	10	78	95	82	92	69	55	34	27	26	22	41	65	23	22	77	77	39	45	99	69	19	77	76	97	65	25	60	82	88	56	116
8.75	34	87	49	20	16	13	53	22	21	18	41	38	46	7	11	16	9	10	80	97	84	93	70	58	35	28	26	22	42	66	25	23	77	79	41	46	101	70	18	79	77	98	67	25	61	84	90	58	119
9	30	89	50	17	14	11	56	24	25	19	42	42	43	7	13	16	10	11	85	102	89	98	74	63	28	29	28	23	43	69	29	26	82	82	45	47	97	70	17	80	80	102	71	27	65	87	93	60	117
9.25	32	94	55	19	17	14	60	26	27	21	45	43	45	8	15	17	12	13	89	106	93	103	77	66	31	33	31	26	48	73	31	29	85	85	48	49	101	73	19	83	84	107	74	27	68	91	95	61	122
9.5	32	97	57	19	17	13	62	26	26	20	44	43	47	9	14	17	12	13	91	108	97	105	79	70	31	33	32	29	49	75	35	32	87	88	52	50	103	74	20	85	86	109	76	29	72	93	97	65	125
9.75	36	101	60	24	19	16	66	27	27	22	46	42	53	8	16	20	12	13	91	108	98	106	80	71	37	35	33	30	51	74	36	32	86	89	53	50	111	76	20	87	87	108	78	29	71	94	100	63	134
10	34	104	61	22	17	13	66	25	24	19	44	41	54	8	13	18	10	12	92	111	100	108	80	73	36	36	34	31	52	75	38	34	89	90	56	50	113	78	20	88	89	111	80	29	72	95	102	66	137
10.25	34	108	66	21	18	13	71	28	26	20	44	43	56	8	16	20	12	12	95	114	104	112	83	77	35	38	37	34	54	79	41	38	92	93	58	52	113	80	20	90	93	115	83	30	75	98	105	67	140
10.5	33	110	68	21	17	12	72	27	25	18	43	41	58	7	13	18	10	12	96	115	106	113	85	79	35	38	37	34	55	80	43	39	92	94	61	51	115	81	19	92	93	117	85	30	75	100	105	68	143
10.75	33	113	72	22	19	13	77	30	27	21	45	43	61	8	15	20	13	13	100	119	109	117	87	83	36	41	39	37	58	83	47	42	97	97	64	53	118	84	22	95	96	120	87	31	79	103	109	70	147
11	35	118	73	23	18	12	78	26	23	18	42	40	66	8	14	20	10	11	100	121	110	118	88	83	40	42	41	38	59	83	47	43	96	97	64	52	124	86	21	96	98	121	88	30	78	103	109	70	153
11.25	35	121	76	24	19	13	83	30	26	20	43	43	68	9	15	21	13	14	104	123	114	122	91	89	40	43	44	41	61	85	51	47	99	101	68	55	124	89	23	99	101	125	91	32	81	107	113	74	156
11.5	34	123	78	24	18	12	86	30	25	19	44	43	69	8	14	21	12	13	105	126	115	124	93	90	40	45	44	42	62	86	53	49	101	102	69	55	126	89	22	99	102	126	92	32	82	108	115	74	159
11.75	35	127	83	26	19	14	91	32	26	21	45	43	73	9	15	22	13	14	108	128	118	127	95	94	42	46	47	45	64	89	55	51	102	104	71	56	129	92	24	103	104	128	94	32	83	110	117	76	163
12	36	131	85	28	21	14	96	33	27	21	46	43	78	10	16	23	14	14	110	132	121	130	98	98	43	48	49	46	66	91	58	54	104	107	74	59	132	94	25	105	106	131	96	32	86	112	119	79	167
12.25	35	133	89	28	20	15	100	37	30	22	48	46	79	10	16	24	16	15	113	134	124	132	100	102	44	50	51	48	68	93	61	58	108	108	77	62	134	96	29	106	109	135	99	35	89	114	123	82	168
12.5	37	137	92	31	22	16	104	37	28	22	47	43	84	11	17	25	16	15	114	135	125	134	101	104	49	52	54	50	69	93	63	59	108	110	78	61	140	99	30	108	111	135	100	33	88	116	124	83	172
12.75	37	139	93	31	20	15	106	37	26	21	46	42	85	9	15	25	13	14	115	136	125	135	102	106	50	51	53	50	69	94	64	60	108	110	79	62	140	98	32	109	111	135	101	32	87	117	124	84	174
13	37	142	97	33	21	15	109	40	28	21	46	44	87	11	16	25	15	16	117	138	128	137	104	113	52	53	56	52	71	96	67	62	110	113	82	65	141	101	36	110	113	137	103	34	90	118	127	89	175
13.25	37	144	99	36	22	16	111	41	28	21	47	44	91	10	17	26	15	15	119	140	128	139	105	116	56	55	57	53	73	98	68	64	111	114	83	66	144	103	40	112	115	139	104	34	92	120	129	92	178
13.5	38	150	103	39	22	15	115	42	27	22	46	44	95	12	17	26	16	15	120	143	130	141	106	120	62	57	60	56	75	99	70	67	113	115	85	68	149	107	44	114	118	142	107	34	93	122	131	95	182
13.75	37	151	106	40	23	18	119	47	30	24	50	46	95	12	18	29	17	17	124	144	133	144	109	126	60	58	60	57	77	102	72	68	116	118	88	72	146	106	47	115	118	143	108	35	95	124	135	98	180
14	35	154	108	41	21	15	120	47	28	21	47	46	96	11	17	27	15	15	124	147	134	144	110	130	62	59	61	56	76	102	74	69	117	119	88	71	149	107	49	116	120	144	110	35	96	125	137	100	183
14.25	41	159	113	47	27	19	125	51	30	25	49	44	103	13	18	30	18	17	127	147	134	147	110	133	71	62	64	61	81	104	75	71	117	120	89	72	157	112	56	119	123	145	111	34	94	127	136	101	188
14.5	36	159	115	46	23	16	126	54	32	24	50	48	101	11	18	30	17	17	130	152	138	150	113	140	65	61	65	61	79	106	79	75	121	123	92	77	151	110	57	119	125	148	114	37	99	129	141	106	185
14.75	38	163	118	50	26	18	129	56	31	25	51	45	104	13	18	31	18	18	130	152	138	151	113	142	70	63	66	62	82	107	80	76	122	124	92	76	157	113	61	120	126	149	114	35	97	131	141	107	190
15	38	168	120	53	24	16	130	56	27	21	48	43	108	12	17	32	17	16	131	154	138	151	113	144	74	65	68	64	82	108	80	77	122	124	93	77	162	116	65	122	128	151	115	34	98	133	143	110	193
15.25	37	169	124	55	24	15	133	58	28	22	48	44	109	13	17	32	16	15	132	155	140	153	115	149	75	65	68	65	83	108	83	79	124	126	94	80	163	116	67	123	128	152	117	35	99	134	143	112	193
15.5	38	173	127	59	27	17	135	62	28	24	49	44	112	12	18	32	18	15	136	157	142	154	117	153	80	68	71	66	86	111	86	81	127	127	96	82	166	120	72	125	132	155	120	36	101	136	147	114	196
15.75	39	175	130	62	28	17	138	65	27	21	48	43	114	14	17	33	17	15	137	158	142	156	119	155	83	70	72	68	87	111	86	81	127	128	96	82	169	122	74	126	133	154	121	35	101	138	148	116	198
16	40	177	133	65	30	18	141	70	29	23	50	44	116	14	18	34	19	17	139	159	145	158	121	159	84	71	74	70	89	114	88	84	129	130	100	85	170	123	76	128	135	157	123	37	103	140	151	119	199
16.25	38	179	135	69	32	19	144	73	29	25	51	45	117	14	19	36	19	19	142	162	147	160	122	161	85	72	73	70	89	114	89	85	130	131	101	86	171	123	78	128	136	158	125	36	103	142	151	120	199
16.5	39	183	139	73	34	18	146	75	29	23	50	44	120	15	18	36	18	16	142	163	148	160	123	163	89	74	76	72	90	115	91	86	132	132	102	88	174	126	82	130	138	160	126	36	105	144	153	123	202
16.75	38	185	141	77	38	19	149	80	34	27	53	49	121	15	20	38	21	19	146	166	151	164	127	168	88	76	78	75	93	118	94	91	136	136	105	93	173	127	85	132	141	164	129	40	109	146	156	128	202
17	40	186	144	81	40	19	151	83	31	26	53	48	124	16	20	38	22	19	147	167	152	165	127	169	92	75	78	75	94	119	95	91	135	136	107	93	176	128	86	133	142	164	130	38	109	147	157	128	204
17.25	40	189	146	85	42	19	153	84	31	25	52	46	126	16	20	40	21	18	149	169	153	166	128	171	94	78	80	76	95	120	97	92	137	137	107	94	179	131	89	134	144	165	132	39	109	150	158	130	206
17.5	42	192	149	90	45	19	156	85	30	25	51	46	129	17	20	40	21	18	150	170	154	166	129	171	98	80	81	78	96	121	98	92	138	138	108	96	181	133	92	137	145	166	134	37	110	150	160	132	208
17.75	37	193	148	91	44	16	154	85	27	21	49	43	127	15	17	39	17	14	149	171	154	165	128	172	96	79	80	76	95	119	98	91	137	136	107	95	182	131	90	135	145	165	133	34	108	150	159	132	209
18	40	195	152	95	50	18	159	90	30	25	52	47	131	17	20	42	21	19	153	173	157	169	131	175	100	82	83	80	97	123	101	95	141	140	110	100	185	136	95	139	148	169	136	39	112	154	163	136	210
18.25	39	197	155	98	53	19	161	92	31	25	52	47	132	16	19	43	21	19	155	174	158	171	132	177	102	84	85	81	99	125	103	96	144	142	112	102	184	136	97	140	150	171	138	39	114	156	165	137	211
18.5	41	200	156	101	54	17	162	92	26	21	48	43	137	18	18	43	19	16	153	174	158	169	131	175	106	86	85	82	100	123	102	96	142	140	110	99	189	140	98	141	149	170	138	36	110	155	165	137	214
18.75	41	199	158	104	62	22	166	98	34	28	55	49	136	18	21	46	24	20	159	177	162	175	136	181	106	86	86	84	103	127	106	100	145	148	116	106	187	138	100	143	151	173	141	40	116	159	168	142	212
19	41	202	160	107	61	18	166	95	27	23	50	43	140	19	18	45	19	16	156	176	160	172	133	178	111	89	87	84	103	126	105	98	144	143	113	104	192	142	101	145	153	173	140	37	113	158	166	141	217
19.25	42	203	162	110	67	22	171	101	33	28	55	47	140	20	21	47	23	21	161	179	164	176	137	183	111	90	88	86	105	129	108	101	147	148	118	109	191	142	103	145	155	176	143	40	117	162	171	145	215
19.5	41	205	164	112	67	19	170	101	29	24	52	45	142	20	19	48	21	17	160	179	163	176	137	182	113	91	88	87	105	127	108	101	147	147	117	108	193	144	104	146	156	177	144	38	117	162	170	146	216
19.75	38	205	166	112	71	20	172	104	34	27	55	49	140	20	20	49	23	20	163	183	166	178	140	186	111	92	89	87	105	131	111	103	151	150	120	112	191	142	106	146	156	178	146	41	120	164	172	150	215
20	42	207	168	118	76	23	176	106	33	28	57	48	144	22	21	50	24	21	164	183	168	180	141	188	115	93	90	90	108	132	112	105	152	152	121	114	195	145	108	148	158	180	148	41	121	166	175	151	217
20.25	42	209	170	118	78	21	177	108	32	27	55	49	145	23	21	51	23	20	166	184	168	180	142	189	117	95	91	90	109	133	113	105	153	152	122	116	196	147	110	150	160	182	149	40	122	167	175	154	219
20.5	42	211	172	122	78	21	178	108	31	25	54	46	148	24	20	51	23	18	166	185	169	181	142	189	120	96	93	91	110	133	114	105	152	152	122	116	199	149	112	151	161	182	150	40	122	169	176	156	220
20.75	41	211	173	124	81	21	180	111	31	27	56	46	149	24	20	52	23	19	167	185	169	181	144	191	120	97	92	91	111	134	116	106	154	154	124	118	199	148	111	151	161	182	151	40	123	170	177	157	220
21	40	213	175	125	86	22	182	114	35	28	58	52	148	26	22	54	26	21	170	189	173	184	147	195	120	99	94	93	113	138	118	108	158	157	126	122	198	149	115	153	164	185	153	43	127	172	180	161	220
21.25	41	214	175	128	87	21	183	115	32	27	58	49	150	27	20	54	24	19	170	187	173	184	146	194	121	99	94	93	112	136	118	108	155	157	125	122	200	150	113	153	164	185	154	41	125	173	180	160	222
21.5	43	215	178	131	90	23	185	116	32	27	58	46	154	31	20	55	24	20	171	188	173	185	147	195	126	101	96	95	115	137	119	108	156	158	127	123	203	155	117	156	166	186	156	40	126	174	181	164	223
21.75	41	216	179	133	92	21	187	117	32	27	59	50	154	31	21	57	24	20	173	190	175	185	148	198	126	101	97	95	116	139	121	111	158	159	129	126	204	154	117	157	167	187	158	41	128	176	183	167	225
22	40	217	180	134	94	21	187	119	32	26	59	49	153	31	20	57	23	18	173	190	175	186	150	198	126	102	97	95	116	139	122	111	158	160	129	128	204	154	119	156	167	188	158	41	128	176	183	168	224
22.25	40	220	182	137	96	22	190	122	34	27	61	50	156	34	21	60	25	20	176	192	177	188	151	200	128	104	98	97	117	141	124	112	160	161	131	130	206	156	120	158	169	189	160	42	130	178	185	170	225
22.5	42	220	184	140	100	23	191	123	33	27	62	50	159	37	21	61	26	21	177	193	178	189	152	201	132	105	98	99	120	143	126	113	161	163	133	131	207	157	122	160	170	191	162	42	131	179	186	173	226
22.75	41	220	184	142	101	24	192	124	34	28	63	51	159	37	21	62	25	20	178	194	179	191	154	202	131	105	99	99	121	143	128	115	162	164	133	133	207	157	123	160	171	191	162	42	132	180	188	174	225
23	41	223	186	145	103	23	193	126	32	27	63	51	161	39	21	64	26	20	179	195	180	192	155	204	135	109	101	100	122	144	128	116	163	165	135	136	209	159	125	162	172	192	163	42	134	182	189	176	228
23.25	39	222	186	145	106	24	196	128	37	29	66	53	160	41	21	65	28	21	181	197	182	194	157	206	132	108	100	101	123	146	130	117	164	168	136	138	207	158	124	162	172	193	166	44	136	182	190	179	226
23.5	40	224	187	146	108	25	196	129	35	29	67	54	162	44	22	66	27	22	182	198	183	195	159	207	135	109	101	102	124	147	133	118	165	168	137	141	209	160	126	163	174	195	166	44	137	184	192	180	227
23.75	43	225	189	151	111	26	199	132	34	29	68	52	166	47	22	67	28	21	183	198	184	195	159	207	138	111	102	103	126	148	133	119	164	169	139	142	212	161	129	165	176	195	168	44	136	185	193	182	229
24	43	227	191	153	114	29	201	134	36	31	72	54	167	50	23	69	29	23	185	200	185	198	161	209	140	112	104	105	128	149	135	121	166	170	140	144	213	163	130	166	177	197	170	46	140	187	194	185	230
24.25	44	228	193	156	117	30	203	136	37	32	73	53	169	52	24	70	30	24	185	201	187	199	163	211	142	114	104	107	129	152	136	122	167	172	141	146	214	164	131	167	178	198	171	47	140	188	196	186	231
24.5	41	227	192	156	117	27	202	135	34	28	73	52	169	52	20	70	28	21	186	201	186	198	162	211	142	113	104	105	129	150	137	121	166	172	141	147	215	164	131	167	178	197	171	45	140	189	196	186	231
24.75	45	231	195	159	120	28	203	138	34	30	74	52	173	57	23	71	29	22	187	202	188	199	163	212	146	118	106	108	132	151	138	123	167	172	142	148	219	168	134	170	181	199	173	48	140	190	197	189	234
25	43	232	195	161	122	27	204	138	34	28	75	52	173	57	20	73	29	20	188	203	187	199	164	213	147	118	106	108	132	152	140	124	168	174	142	150	220	168	134	171	181	200	174	50	141	192	197	191	235
25.25	43	233	197	162	122	28	204	138	30	25	74	50	175	58	20	73	27	18	187	203	187	199	164	211	149	120	106	109	133	152	140	123	166	172	141	150	220	170	135	171	182	199	174	49	140	191	197	191	236
25.5	41	233	197	163	126	32	208	143	38	32	80	57	174	61	22	78	31	22	191	207	191	203	168	217	148	121	108	110	135	156	143	127	171	176	146	155	219	168	137	172	182	202	176	55	145	193	200	195	234
25.75	42	234	198	165	128	33	209	144	37	31	82	57	175	63	23	79	31	24	192	208	192	204	170	218	150	122	109	111	136	158	145	127	172	177	148	157	220	169	139	173	184	202	177	57	146	195	201	196	234
26	46	235	201	169	131	37	211	146	37	32	83	55	178	66	26	79	34	24	194	208	193	206	171	218	153	123	110	114	138	158	146	129	171	180	149	158	222	171	141	176	185	204	179	60	146	197	203	198	236
26.25	44	236	201	170	131	36	212	146	35	30	84	56	179	67	23	80	32	23	194	209	193	205	171	219	154	124	110	114	139	159	147	129	173	179	149	160	223	171	141	176	186	205	180	63	147	198	203	200	237
26.5	43	236	202	172	132	37	213	147	37	31	86	57	180	69	24	82	34	24	195	211	194	206	173	221	155	125	111	115	140	161	149	130	174	180	150	163	222	171	142	177	187	205	180	66	149	198	205	201	237
26.75	44	237	203	174	135	39	215	150	37	31	88	59	180	72	24	83	34	24	195	211	196	208	174	222	158	127	112	117	142	162	151	132	175	181	152	165	225	172	144	178	188	207	182	70	150	200	206	202	237
27	44	237	204	176	135	40	215	150	33	30	88	55	182	73	23	82	32	23	196	211	195	207	173	221	159	127	110	116	141	161	151	131	172	181	150	164	225	173	144	178	188	206	182	70	148	200	205	203	238
27.25	42	237	204	175	136	42	216	152	38	33	91	60	181	75	25	86	34	25	198	214	198	210	176	225	158	128	112	117	142	165	152	133	176	182	153	168	223	172	144	178	189	206	183	75	152	201	206	205	236
27.5	45	238	207	179	140	45	218	155	40	34	94	63	184	77	26	88	36	25	201	216	199	213	178	226	161	130	114	120	145	166	154	136	177	185	155	170	226	175	147	181	191	209	185	79	154	202	209	208	239
27.75	44	239	206	180	141	45	219	155	38	32	95	62	184	78	25	88	35	24	200	215	199	212	178	226	162	131	114	120	145	167	155	136	177	185	155	170	227	175	147	180	192	209	185	81	153	203	209	208	239
28	45	240	208	183	142	47	220	157	37	32	96	62	187	81	24	89	36	24	201	216	199	212	179	225	165	133	113	122	147	167	157	137	176	184	156	171	230	177	149	183	193	210	186	84	153	204	210	210	241
28.25	44	241	209	183	144	49	222	157	38	33	98	64	186	81	25	90	37	25	203	217	201	213	180	228	165	133	114	122	148	168	158	137	178	186	157	173	229	176	150	183	193	210	187	87	155	206	212	211	241
28.5	45	241	210	185	146	52	223	160	39	34	100	65	188	84	26	92	40	26	204	218	203	214	182	230	167	134	115	124	150	170	160	139	179	187	159	176	230	178	151	184	194	213	188	90	156	206	212	213	242
28.75	44	242	211	186	146	51	223	160	38	33	101	67	188	85	24	94	39	25	204	219	203	215	182	230	168	136	116	124	150	172	160	138	180	187	159	177	230	178	151	184	195	212	188	92	157	206	213	214	242
29	47	241	212	188	148	56	224	163	38	35	103	67	190	87	26	94	41	25	205	219	204	217	183	231	171	137	115	126	152	172	161	140	180	190	160	178	232	179	153	186	196	213	189	94	158	209	214	216	242
29.25	46	245	213	189	150	55	225	162	38	33	103	69	193	90	24	95	40	24	206	221	204	216	184	231	174	139	118	126	153	174	163	141	180	189	161	181	234	181	155	187	198	214	191	97	159	209	214	218	246
29.5	46	245	214	191	151	58	227	164	38	34	105	70	193	91	26	98	41	25	207	223	205	219	186	233	175	140	117	127	154	176	164	142	182	191	163	181	233	181	156	188	198	215	192	101	161	210	216	219	244
29.75	46	244	214	193	151	59	228	166	39	33	106	71	194	92	25	98	42	25	208	223	205	219	186	233	176	141	117	128	155	175	166	143	181	191	162	183	234	182	157	189	199	215	192	102	161	211	216	221	245
30	46	247	216	194	154	61	230	168	40	35	108	74	196	94	25	101	43	26	210	225	207	220	188	235	178	143	119	130	156	179	167	145	183	193	164	185	235	183	160	190	201	217	193	105	162	212	218	222	247
30.25	47	247	217	196	156	66	231	170	41	37	110	74	198	97	27	102	46	27	211	226	208	221	189	235	180	145	120	132	159	180	169	146	184	194	166	186	238	185	161	192	203	218	195	108	163	213	219	224	247
30.5	45	247	217	196	155	64	231	170	39	35	112	74	197	97	26	102	44	25	211	226	208	222	189	235	179	145	119	131	159	179	170	146	183	193	166	188	237	184	160	191	201	217	194	109	164	214	219	225	247
30.75	46	248	219	199	158	66	232	172	40	36	113	77	199	99	26	105	47	27	213	229	210	223	191	236	183	148	121	133	160	182	172	148	185	195	167	189	239	186	163	193	204	219	196	112	165	215	221	227	249
31	47	247	219	200	158	68	234	173	40	37	115	78	199	101	26	106	47	27	213	229	210	225	193	237	182	146	120	133	161	182	173	149	186	196	169	190	238	185	163	193	204	219	197	113	165	216	221	228	247
31.25	45	250	221	201	159	67	234	174	40	36	116	80	201	102	25	109	47	25	214	231	211	225	193	238	186	150	123	134	163	184	174	149	187	195	168	192	240	188	165	195	205	220	198	116	167	216	222	229	250
31.5	47	249	221	203	161	71	236	175	39	37	116	78	203	104	25	108	48	26	214	230	211	224	193	237	186	151	122	136	163	184	174	149	185	196	169	191	241	188	165	195	206	220	198	116	166	217	222	230	250
31.75	44	248	221	202	163	72	237	176	45	41	120	86	201	104	27	112	52	29	217	234	214	229	197	241	186	151	124	136	165	187	177	152	190	199	172	196	239	186	166	195	206	221	200	119	170	217	224	232	247
32	46	251	224	206	165	77	239	179	46	42	122	85	204	106	28	114	53	29	218	234	215	229	198	242	189	153	125	138	166	188	178	154	190	200	173	197	242	189	168	198	208	223	201	122	171	220	225	234	251
32.25	48	251	225	208	166	77	240	180	44	42	121	84	206	109	27	113	53	27	218	234	215	228	198	241	192	155	124	139	167	187	179	154	189	200	172	197	244	191	170	199	209	223	201	123	170	220	225	234	252
32.5	48	253	226	210	167	78	240	181	46	42	122	86	207	110	27	115	55	27	220	235	215	229	198	242	194	157	126	140	169	189	180	155	190	200	174	199	245	192	171	200	210	224	203	125	172	221	226	236	253
32.75	48	252	226	210	169	79	240	182	46	44	123	86	207	112	27	116	55	28	220	236	216	230	199	243	194	157	126	141	170	190	181	155	190	201	174	199	245	192	172	200	211	224	204	126	172	222	227	237	253
33	46	253	227	210	169	80	241	184	48	46	125	92	206	112	27	119	57	28	221	238	217	232	201	245	194	158	127	140	170	192	183	157	193	203	176	202	243	191	172	200	211	225	204	128	174	222	228	238	252
33.25	48	253	227	211	170	83	243	184	48	47	127	90	209	114	28	119	57	28	222	237	217	231	202	245	197	158	127	142	171	192	184	158	192	203	177	202	245	192	173	201	212	226	206	129	175	224	229	239	253
33.5	49	255	229	213	174	84	243	186	50	48	127	92	210	115	29	121	60	29	224	239	219	232	203	246	199	161	129	143	172	194	185	159	193	204	178	204	246	193	175	203	214	227	206	131	176	224	230	241	255
33.75	46	253	229	213	173	85	244	187	52	49	130	94	209	117	29	122	60	29	224	239	219	234	205	248	197	161	128	142	173	195	186	159	195	205	179	205	245	193	175	203	213	227	207	133	177	224	231	242	252
34	47	255	229	215	175	87	245	188	53	51	131	96	210	118	29	125	62	30	225	241	221	235	206	249	200	163	129	144	175	197	188	162	197	206	180	207	246	195	177	204	216	228	208	135	179	225	231	243	254
34.25	49	257	232	218	177	88	245	190	53	52	131	96	214	121	29	127	63	29	226	242	221	234	206	249	203	166	131	147	176	197	189	163	196	207	180	208	249	197	179	206	217	229	209	137	178	226	232	245	256
34.5	47	255	231	217	176	89	246	190	56	54	133	99	212	121	30	127	64	30	226	243	222	236	207	250	201	165	130	146	176	198	190	163	198	208	182	208	246	195	177	205	216	229	210	137	181	227	233	246	253
34.75	50	257	232	219	180	92	247	192	58	56	135	101	214	123	30	130	67	32	229	243	224	238	208	251	204	167	132	148	177	200	191	164	199	209	184	210	249	197	180	207	218	231	211	139	182	228	234	248	255
35	49	258	233	221	180	92	248	192	57	56	135	101	215	123	30	131	66	31	229	244	223	237	208	251	206	168	131	148	178	201	192	165	198	209	182	210	249	198	181	208	219	231	212	140	181	228	233	248	257
35.25	53	257	234	222	181	94	249	193	59	59	136	101	217	126	31	131	68	32	230	244	224	237	209	252	208	169	132	149	180	201	193	166	198	209	184	212	251	199	182	208	219	231	212	141	182	230	234	249	257
35.5	54	258	234	222	182	95	250	196	62	60	139	104	216	126	32	134	68	33	230	246	226	239	211	254	207	169	131	149	180	202	194	167	200	211	186	214	249	198	182	208	220	231	213	142	184	230	236	251	255
35.75	58	260	236	225	184	97	251	196	62	61	138	104	220	130	31	136	71	33	232	246	225	239	211	254	211	171	133	152	182	204	196	168	199	211	186	214	254	201	184	211	222	233	214	144	184	231	236	252	259
36	58	260	237	226	184	95	250	196	62	60	138	105	220	129	29	137	70	30	232	247	225	238	211	254	211	172	134	151	181	204	196	168	201	211	186	215	253	201	185	211	222	233	214	145	183	231	236	252	259
36.25	62	260	237	227	187	99	252	199	66	65	142	109	220	131	32	140	75	34	234	249	228	241	214	257	212	174	136	153	184	207	198	171	204	214	189	217	253	201	186	212	224	234	216	147	187	233	238	255	259
36.5	67	262	238	228	188	101	254	200	67	66	142	109	222	133	35	141	75	35	235	249	229	242	215	257	214	175	136	154	185	208	200	172	203	213	189	218	254	203	187	213	225	236	217	148	187	234	238	256	260
36.75	70	262	239	230	189	101	254	200	68	67	143	111	223	134	34	142	76	34	236	250	229	242	216	258	216	176	137	155	185	208	201	172	203	214	190	219	255	204	188	214	226	236	217	150	187	234	239	258	260
37	72	260	238	229	190	102	254	202	71	68	146	112	222	134	35	144	77	36	236	250	231	244	217	260	214	176	136	155	185	210	202	173	205	216	192	221	253	202	188	213	226	236	218	150	189	234	239	257	258
37.25	80	264	240	233	192	104	255	203	71	69	145	112	228	138	36	146	78	36	236	251	231	242	216	258	221	179	137	157	188	209	203	174	204	215	190	220	257	206	191	215	227	237	219	151	188	236	239	258	260
37.5	78	262	240	233	191	105	256	204	71	70	146	113	225	136	36	146	78	36	237	252	231	242	217	260	218	179	136	156	188	210	203	175	205	216	192	222	255	205	190	215	227	236	219	152	189	236	240	260	261
37.75	81	264	241	234	194	106	257	205	75	73	148	117	226	139	38	150	82	38	239	253	233	245	220	262	220	181	139	158	189	213	206	177	208	218	194	224	256	205	192	217	229	239	220	155	192	235	241	262	261
38	83	263	241	234	195	107	257	206	77	73	150	119	226	140	39	151	82	38	240	254	233	246	221	262	220	182	139	159	189	214	207	177	208	218	195	225	256	206	192	216	228	238	221	155	192	236	242	262	260
38.25	87	263	242	235	195	108	258	207	76	74	149	117	228	140	39	151	83	38	240	254	233	246	220	261	221	182	138	160	189	213	207	178	208	219	194	225	257	206	193	217	229	238	222	156	192	237	242	262	261
38.5	92	264	243	237	196	109	259	207	77	75	151	118	229	142	40	152	84	39	241	254	234	246	221	262	223	183	139	161	191	213	208	179	208	218	195	226	258	208	195	219	230	239	222	157	191	238	242	264	262
38.75	93	265	243	238	197	110	259	208	79	76	150	118	230	143	40	154	86	39	241	255	234	246	221	262	224	184	139	161	192	214	209	179	208	220	195	227	259	209	195	219	230	239	223	157	192	238	243	264	262
39	98	267	245	240	202	113	261	211	82	79	153	122	231	146	44	157	89	43	243	256	235	247	224	264	226	186	142	164	194	217	212	181	210	220	198	229	260	210	198	221	233	241	225	160	195	239	244	267	264
39.25	97	266	244	239	202	113	261	211	84	80	155	123	232	147	45	158	90	44	244	257	237	249	225	266	226	186	142	164	195	218	212	182	212	221	198	229	259	210	197	221	233	241	226	161	196	240	245	268	263
39.5	100	266	245	240	202	114	260	211	83	79	155	124	231	148	45	158	90	42	243	257	236	248	225	265	227	187	141	164	194	217	212	182	211	221	198	230	259	210	198	221	233	241	225	161	195	239	244	268	262
39.75	103	268	247	242	204	117	263	213	85	82	155	125	234	150	47	160	92	45	245	258	238	249	225	266	229	189	143	166	197	220	214	183	212	222	199	231	262	213	200	223	234	242	227	162	196	241	246	270	264
40	104	267	246	242	204	116	262	213	85	82	155	125	234	149	47	161	92	43	244	258	236	248	226	266	230	189	142	165	197	218	214	183	211	221	199	231	261	212	200	222	234	241	225	162	196	241	245	269	264
40.25	103	267	247	243	207	117	263	215	90	84	160	132	234	151	52	164	96	49	246	260	240	252	229	269	229	191	145	167	198	222	216	186	216	225	203	234	259	212	200	224	235	243	228	165	199	241	247	271	262
40.5	109	267	247	244	207	121	264	216	90	86	160	129	235	152	53	164	97	49	246	260	239	252	229	268	231	191	145	168	199	221	217	186	214	224	202	234	261	213	201	224	236	243	228	166	199	243	247	272	264
40.75	111	267	247	244	209	123	265	218	93	88	163	132	235	154	57	165	99	53	248	261	241	254	232	271	231	192	145	168	200	224	218	188	217	227	205	236	260	213	202	224	237	244	230	167	200	244	249	274	262
41	110	268	248	245	210	122	265	218	94	89	163	135	236	155	57	168	100	52	248	262	242	255	232	271	232	194	147	169	200	224	219	189	218	227	206	236	260	214	203	226	237	244	231	168	202	243	250	274	263
41.25	112	270	250	247	210	122	265	217	93	87	161	132	238	157	55	169	100	48	247	262	240	251	230	269	235	195	147	170	201	224	220	188	215	224	203	234	264	216	205	226	237	244	230	168	200	244	247	273	266
41.5	113	268	249	247	211	126	267	220	97	91	166	137	237	157	62	169	103	55	249	264	242	256	233	273	233	195	147	171	202	226	221	190	219	228	208	238	261	215	205	226	238	245	231	171	203	245	251	276	262
41.75	115	270	250	249	213	126	267	221	97	91	164	136	239	160	61	172	103	52	250	264	242	254	232	272	236	197	148	172	203	226	222	190	218	227	206	237	264	217	207	228	238	245	231	171	202	246	250	276	267
Data File	J:\Service\Customer\400\411\ShID_561\data\Assays\10144\crod_SIDx6450xICC169___7_37_144_209_Marx27x2013_A_04A.oka
Set up Time	Mar 27 2013 5:31 PM
Position	4-A
Plate Type	PM07-
Strain Type	NOT APPLICABLE
Sample Number
Strain Name	Crod
Strain Number	SID_6450_ICC169
Other
Hour	A01	A02	A03	A04	A05	A06	A07	A08	A09	A10	A11	A12	B01	B02	B03	B04	B05	B06	B07	B08	B09	B10	B11	B12	C01	C02	C03	C04	C05	C06	C07	C08	C09	C10	C11	C12	D01	D02	D03	D04	D05	D06	D07	D08	D09	D10	D11	D12	E01
0	23	8	6	5	0	1	0	0	1	3	15	19	23	5	4	0	0	0	0	0	0	2	10	15	22	5	3	2	0	0	0	0	0	0	10	28	26	9	6	3	1	0	0	0	2	10	9	16	28
0.25	21	5	8	1	1	3	9	6	11	9	28	28	22	2	7	0	0	2	5	3	4	9	16	26	19	3	3	2	0	3	0	4	4	8	17	37	22	7	6	5	0	5	0	7	5	14	18	27	25
0.5	22	5	7	1	0	2	7	5	10	7	26	27	23	3	7	0	0	2	6	4	4	9	16	26	20	4	3	2	0	3	0	6	5	10	18	37	25	8	6	5	0	6	0	9	8	16	20	30	26
0.75	24	7	9	4	2	4	12	8	13	11	29	30	26	4	9	3	0	3	9	7	5	11	17	29	24	5	4	4	0	5	0	8	7	12	19	37	29	10	8	8	3	9	2	11	9	17	21	32	32
1	24	7	9	3	2	4	11	8	13	10	29	31	25	4	9	3	0	4	9	7	5	11	18	29	24	5	5	6	0	6	0	8	8	12	20	36	28	10	9	7	3	9	3	12	10	15	22	34	30
1.25	23	7	10	4	4	5	14	10	15	12	32	32	25	4	9	4	2	5	10	9	7	12	20	31	22	5	5	6	0	7	0	10	10	14	22	37	27	10	9	9	4	11	3	13	11	18	24	35	29
1.5	25	8	11	6	4	6	14	11	16	12	32	32	27	4	9	4	3	6	11	10	7	13	20	33	24	7	6	7	0	7	1	10	11	16	22	38	29	11	9	9	5	12	4	13	13	19	24	36	32
1.75	26	10	13	8	6	7	18	13	18	14	35	35	29	6	10	6	4	8	13	11	9	14	20	33	26	7	7	8	0	10	2	12	12	17	23	39	33	12	11	11	6	13	6	15	14	20	26	38	34
2	23	8	11	6	5	6	17	12	15	14	33	33	24	4	9	5	2	5	12	10	8	14	20	32	20	5	6	6	0	8	0	9	10	14	21	37	25	10	8	8	4	10	4	13	11	17	23	35	27
2.25	24	8	11	6	5	5	16	10	15	12	33	33	25	4	8	5	2	5	11	11	9	14	21	33	20	5	7	6	0	7	1	10	11	15	23	37	26	10	8	9	4	12	4	14	13	19	25	37	28
2.5	24	10	12	8	7	7	18	13	17	14	36	35	26	4	10	7	4	6	14	15	11	16	23	36	21	6	7	6	0	11	2	12	13	17	24	40	28	13	10	13	6	14	7	17	16	21	27	40	31
2.75	26	12	14	8	7	8	20	14	18	15	36	35	28	5	10	6	5	7	15	15	12	17	23	36	24	8	9	8	1	12	3	12	15	18	25	40	30	14	12	16	8	16	8	17	17	23	28	42	38
3	28	14	15	10	9	8	21	15	18	15	37	36	31	5	10	9	6	7	15	16	12	17	24	36	27	8	10	8	1	14	4	14	17	19	25	41	36	17	12	21	9	20	9	18	17	23	30	43	45
3.25	26	14	14	8	7	6	20	13	18	14	36	35	27	4	8	8	4	6	17	20	12	19	24	36	22	7	9	7	0	15	2	12	19	19	24	39	32	17	9	24	8	24	8	17	16	25	33	42	42
3.5	27	13	14	9	8	8	20	13	17	14	36	35	28	4	9	8	4	7	21	25	16	24	24	38	23	9	10	9	1	21	4	13	25	24	26	41	36	22	11	30	13	32	10	19	19	29	38	45	46
3.75	30	17	17	12	10	9	23	16	18	15	37	36	32	6	10	10	6	8	27	31	21	31	26	38	28	11	11	11	3	25	5	15	31	28	26	41	43	27	14	37	20	37	12	20	22	34	43	46	54
4	31	20	17	12	10	10	25	16	20	16	38	38	31	6	10	10	6	8	30	37	26	36	28	39	26	11	12	11	4	29	6	15	36	32	26	41	44	30	13	40	25	43	15	20	26	38	49	48	56
4.25	30	24	18	11	11	11	28	15	19	16	38	37	31	5	10	10	6	8	34	42	30	41	31	39	28	10	11	10	4	34	7	15	41	36	27	43	48	33	13	45	29	48	19	21	30	43	55	50	60
4.5	30	29	19	13	11	10	30	17	21	17	39	38	32	6	11	12	7	10	39	49	36	48	35	41	28	13	12	12	5	39	8	17	46	42	28	44	50	38	14	50	34	54	23	23	34	47	61	52	65
4.75	33	34	21	15	14	11	32	18	22	18	40	38	36	7	12	13	8	10	43	54	42	54	39	42	33	14	15	14	7	43	9	18	51	47	29	44	58	43	16	54	39	59	27	22	39	52	64	53	73
5	32	37	21	14	12	10	33	17	20	17	39	37	35	7	11	12	7	9	47	59	44	57	43	41	31	13	14	13	8	45	8	16	55	51	28	43	60	44	14	56	42	63	29	23	40	54	67	54	74
5.25	33	43	22	15	13	10	34	18	20	17	39	38	36	7	11	13	8	9	51	64	49	61	47	42	32	14	15	13	11	47	8	17	58	54	28	44	65	47	15	59	47	67	34	23	43	58	69	55	80
5.5	30	48	23	13	13	11	38	19	22	19	42	40	33	6	11	13	8	11	57	72	54	67	52	46	28	14	17	13	14	52	10	19	64	60	31	47	62	50	15	63	53	74	41	26	47	64	73	59	77
5.75	32	53	25	15	14	12	40	20	22	18	41	39	36	7	12	14	9	10	60	76	58	71	54	45	31	16	18	15	17	53	11	19	66	63	31	46	70	53	16	66	57	77	44	25	50	67	75	60	83
6	32	57	26	15	14	11	42	20	22	18	40	39	38	6	11	14	9	10	63	78	59	74	56	46	31	16	17	14	19	55	10	19	67	65	29	45	75	56	15	67	58	79	46	24	50	69	78	61	87
6.25	31	61	28	13	14	11	45	22	24	19	42	42	35	6	12	15	10	11	70	85	66	80	61	50	26	17	20	15	24	59	12	22	73	70	34	49	72	57	15	71	64	85	53	28	55	74	82	64	84
6.5	31	65	30	15	14	11	47	21	22	18	42	40	37	6	11	16	9	10	72	87	67	82	61	51	28	17	22	15	28	62	14	20	75	71	32	46	78	59	16	73	66	88	55	26	55	75	83	64	90
6.75	33	70	33	17	15	13	50	21	23	20	43	40	42	7	12	17	9	11	74	91	70	86	64	53	33	21	23	17	30	64	16	21	76	74	33	46	86	62	17	75	69	90	58	26	57	78	86	66	98
7	35	76	37	17	16	13	53	22	23	19	43	41	45	9	13	19	10	10	79	94	74	90	66	56	36	24	25	20	36	68	19	21	79	76	35	47	91	65	19	79	73	95	61	27	59	81	88	67	102
7.25	34	79	38	18	17	13	55	23	23	19	43	40	48	8	12	19	9	10	79	96	76	93	66	57	35	26	25	20	39	68	20	22	79	78	36	47	95	66	18	80	75	97	64	27	61	83	90	68	107
7.5	35	83	41	18	17	12	58	23	24	20	43	40	49	8	13	20	10	11	82	100	80	96	69	61	35	27	28	23	42	70	23	22	82	81	38	47	97	68	18	83	78	100	67	27	63	85	92	72	110
7.75	37	88	45	20	19	15	62	26	26	22	45	41	54	9	14	23	11	13	86	103	84	101	73	65	37	31	30	26	47	75	27	24	85	84	42	49	102	72	20	87	81	104	70	29	66	88	96	75	115
8	36	90	47	21	19	14	64	25	26	22	45	42	56	9	14	24	11	12	87	106	86	103	74	68	36	32	30	28	47	75	28	24	86	86	44	49	105	72	18	88	83	106	73	28	67	89	97	75	118
8.25	37	95	50	22	20	15	68	25	26	22	45	42	59	10	14	25	12	12	90	109	89	107	77	70	39	35	34	31	51	78	31	25	88	88	46	49	111	76	21	92	87	109	75	28	69	91	99	77	123
8.5	32	98	52	19	19	14	73	27	27	22	47	43	57	8	14	25	12	13	94	114	94	112	81	74	30	35	35	31	53	80	35	28	92	91	51	52	105	75	19	93	89	114	80	30	71	95	103	80	121
8.75	34	101	55	21	19	14	76	27	27	22	46	44	62	8	14	26	12	12	96	116	96	113	83	77	34	37	38	35	55	83	39	29	93	93	54	50	111	79	20	96	92	116	82	31	73	97	105	82	126
9	36	106	60	23	22	16	82	30	29	24	49	45	65	10	16	29	14	15	99	119	99	117	85	82	38	40	40	39	59	86	43	33	96	96	58	53	116	82	21	98	95	120	85	31	76	99	108	85	131
9.25	37	110	62	24	22	16	85	31	28	23	49	45	68	10	15	29	14	16	101	122	103	120	88	86	38	42	42	41	61	89	46	36	99	99	61	55	118	83	22	101	97	123	88	33	79	104	112	89	136
9.5	37	112	63	25	19	14	85	28	24	20	45	41	71	9	13	30	11	12	101	123	103	120	87	84	38	43	43	41	62	88	47	36	98	98	61	52	121	84	21	102	99	123	89	30	77	103	110	87	139
9.75	39	118	68	28	22	17	91	32	27	23	49	43	78	11	14	32	13	14	104	125	106	123	90	88	42	46	47	45	64	91	51	39	101	101	65	54	127	88	23	104	101	126	92	31	80	106	114	90	145
10	35	122	71	28	21	16	95	33	29	23	49	46	77	10	16	33	15	15	108	131	110	127	94	95	37	46	50	47	67	94	55	44	105	105	70	58	124	88	23	107	104	131	95	33	83	110	117	95	146
10.25	37	125	73	29	22	16	97	34	28	23	48	46	82	11	16	34	14	15	110	133	112	130	96	98	41	48	52	49	69	95	57	46	106	107	72	61	131	91	23	108	107	133	98	34	84	112	120	99	152
10.5	38	127	76	31	22	16	99	34	28	25	49	45	84	10	16	35	14	14	111	133	113	131	98	101	43	49	52	49	69	95	59	49	107	109	74	61	133	92	23	110	107	132	100	33	85	115	121	100	154
10.75	39	130	78	33	22	15	101	35	26	21	48	42	88	11	14	35	13	13	111	134	113	131	98	102	47	50	54	51	70	96	62	50	106	108	74	62	138	95	24	111	109	134	100	31	84	115	122	102	161
11	39	135	82	35	22	16	104	37	27	23	48	42	89	13	15	36	13	14	113	137	116	133	101	107	47	53	56	54	73	98	63	53	109	111	78	64	141	97	26	113	112	136	103	32	87	118	124	107	164
11.25	40	138	86	38	24	18	107	39	29	24	50	43	91	12	16	38	15	15	117	138	119	136	104	112	51	54	58	56	75	100	66	56	110	113	80	67	145	99	29	115	114	140	105	33	89	120	127	110	167
11.5	40	141	88	40	23	17	110	41	27	24	50	43	92	12	16	39	14	14	118	141	120	139	105	116	52	54	60	58	76	100	69	60	113	114	82	69	147	101	32	117	117	141	108	33	91	122	129	114	170
11.75	39	144	91	42	25	17	112	43	28	23	51	44	93	12	16	41	15	15	121	144	123	142	107	121	52	56	62	60	78	104	73	63	115	117	85	72	148	103	36	119	119	144	110	35	92	124	132	118	172
12	39	148	93	44	23	16	114	44	27	23	49	43	97	13	15	41	15	14	122	145	125	143	108	124	56	58	63	62	80	105	74	65	115	119	87	72	153	105	39	121	122	145	113	34	93	126	133	121	176
12.25	39	151	98	48	26	17	118	47	29	24	51	43	99	12	16	43	16	15	124	148	127	146	111	129	59	60	66	64	81	107	76	68	117	120	89	75	155	107	44	123	124	147	114	34	95	128	135	123	179
12.5	36	154	101	50	27	18	122	53	32	26	53	47	97	11	18	46	17	17	129	151	130	151	115	136	57	60	67	65	84	111	80	72	121	124	93	78	152	107	47	125	126	151	117	36	98	132	138	128	178
12.75	39	158	105	54	30	19	125	56	33	27	54	47	102	12	19	46	19	18	130	153	131	152	116	139	63	62	69	67	85	112	82	74	122	126	94	80	158	110	52	126	129	153	118	37	100	132	141	131	182
13	39	161	109	57	32	21	127	59	32	27	55	48	103	13	19	48	19	18	132	155	133	154	118	143	66	63	71	69	88	115	84	77	124	128	97	84	160	112	56	128	130	154	120	37	102	135	143	134	186
13.25	39	165	111	60	32	18	128	60	31	25	53	46	106	13	17	48	19	17	134	156	135	155	119	145	69	65	73	71	88	117	85	78	126	129	98	84	163	114	60	130	133	157	122	37	103	136	145	136	189
13.5	42	167	115	65	36	20	131	63	32	26	54	46	111	14	18	49	20	17	134	156	135	155	120	148	76	67	74	73	90	115	87	80	125	129	100	85	168	117	64	132	135	158	123	36	104	137	146	138	194
13.75	42	171	118	70	37	19	132	66	30	26	53	45	113	15	18	51	19	16	136	159	137	157	122	149	78	69	77	75	92	118	89	84	128	132	101	86	172	120	69	135	137	161	126	36	105	140	147	140	198
14	43	174	121	74	40	20	135	69	31	26	54	45	116	16	19	53	20	17	138	159	138	158	123	153	82	71	78	75	94	118	90	84	129	133	103	89	174	122	73	136	139	161	127	36	106	141	149	142	199
14.25	41	177	123	78	40	15	134	68	25	22	49	40	118	15	16	53	16	14	137	160	137	156	122	151	84	72	79	77	94	118	91	84	127	131	102	86	177	123	75	137	142	162	127	32	104	140	147	140	203
14.5	41	178	125	81	43	17	136	71	27	21	49	42	118	14	17	55	18	15	140	162	139	159	123	156	85	72	80	76	95	120	93	87	129	134	104	90	178	124	78	138	142	163	129	34	106	144	151	145	202
14.75	40	182	129	86	46	15	139	75	27	22	50	44	121	14	17	56	19	15	142	165	141	162	125	159	89	74	82	79	97	122	96	89	132	135	106	92	180	126	82	142	146	166	132	35	109	146	152	148	205
15	41	185	131	90	49	17	141	76	27	23	50	41	123	16	17	57	19	15	143	165	141	162	126	160	91	77	83	81	99	123	97	90	132	137	107	93	184	128	84	143	148	167	133	34	109	146	153	148	207
15.25	40	186	133	92	52	17	143	79	28	22	52	43	122	14	18	59	20	15	146	168	144	165	128	166	92	77	84	81	98	124	99	92	137	140	110	97	183	129	86	144	149	170	136	37	112	151	156	153	206
15.5	43	189	136	96	57	17	146	81	28	22	52	42	126	16	17	61	20	16	146	168	144	164	129	166	96	79	86	85	101	126	100	94	136	140	111	97	187	132	90	147	151	171	136	35	111	150	157	152	210
15.75	39	191	138	98	59	15	148	84	28	22	52	44	125	15	17	63	20	15	149	171	146	167	130	168	96	80	87	84	102	127	102	95	139	141	112	100	186	132	92	148	153	173	138	36	113	154	158	156	211
16	43	194	142	103	63	19	151	88	30	25	54	45	130	18	19	63	22	17	151	173	147	169	133	172	101	83	90	87	104	130	104	97	140	144	115	103	190	135	96	150	155	175	140	37	115	155	161	159	213
16.25	41	194	143	104	65	18	152	88	29	23	54	44	130	17	17	64	21	15	151	172	148	170	134	173	102	82	89	87	104	128	104	98	140	145	116	103	190	135	96	150	156	176	141	37	115	156	162	160	213
16.5	41	197	146	108	69	19	155	91	28	24	55	43	131	17	18	65	22	16	153	174	149	170	134	175	104	85	91	88	107	130	106	100	141	146	118	105	192	137	98	152	158	178	143	37	117	157	163	163	215
16.75	42	199	147	110	72	19	157	93	30	25	56	44	133	18	18	67	23	16	154	175	151	172	137	176	107	86	92	90	108	132	108	101	144	148	119	107	194	138	101	153	159	179	144	37	118	160	166	164	216
17	42	201	150	113	75	19	158	96	29	24	56	45	135	18	18	68	22	17	156	177	151	173	138	179	110	89	94	90	108	134	110	103	145	150	121	110	196	140	104	155	162	181	146	37	120	162	167	167	218
17.25	42	204	152	116	78	19	160	98	30	25	56	44	136	18	19	71	24	17	157	178	154	174	138	180	113	90	95	92	110	135	111	104	146	150	123	111	198	142	106	157	164	183	148	38	121	163	168	169	221
17.5	42	203	153	117	80	18	161	99	29	24	58	44	137	18	19	70	23	16	158	180	154	176	140	182	113	90	95	93	110	135	112	105	147	153	123	113	198	142	107	158	165	184	150	38	122	166	170	171	220
17.75	43	206	157	121	84	20	164	101	31	26	58	45	139	20	19	74	26	17	159	180	155	176	141	182	116	93	97	96	114	136	114	108	149	152	125	115	201	145	110	160	168	186	151	38	123	166	171	172	224
18	43	208	159	123	87	20	166	104	31	25	59	46	141	20	19	75	26	18	161	181	157	177	142	184	120	94	99	97	115	138	115	109	150	154	127	117	203	146	111	162	169	187	153	39	124	168	173	175	225
18.25	44	210	161	126	90	20	169	105	31	26	61	45	143	20	20	76	27	18	163	183	159	179	144	186	122	96	100	98	116	140	117	110	151	156	128	119	205	149	113	164	171	188	154	39	126	170	175	176	226
18.5	42	211	162	128	91	20	170	107	30	24	60	45	144	20	19	77	26	18	163	184	159	180	145	187	123	96	100	99	117	140	118	110	152	156	129	120	205	148	114	164	172	189	155	38	127	171	175	178	227
18.75	43	214	164	130	94	20	172	110	31	26	61	46	145	22	19	78	28	18	165	185	162	181	146	188	126	99	102	100	118	141	120	112	154	158	131	123	207	150	116	165	173	191	157	40	128	173	177	181	228
19	44	215	166	133	97	21	174	110	31	26	62	46	147	23	19	79	28	18	167	186	162	182	147	190	127	99	102	100	119	143	122	113	154	159	132	125	208	151	118	167	174	192	158	40	130	174	179	183	230
19.25	43	215	167	134	98	20	175	112	30	24	63	45	148	23	19	80	26	16	166	186	163	182	148	191	128	100	102	101	120	142	122	114	155	159	133	127	209	152	119	168	175	193	159	39	130	174	179	184	229
19.5	44	217	169	137	102	21	177	114	31	26	65	47	149	24	20	82	28	18	169	188	165	185	150	193	130	102	105	103	122	144	124	116	158	163	135	129	211	153	121	170	177	194	162	41	133	177	182	187	231
19.75	44	219	171	140	104	21	179	116	32	27	67	47	151	26	20	83	29	18	170	189	167	186	151	194	133	102	105	104	122	145	126	118	158	163	136	131	212	154	122	170	178	196	162	42	132	179	183	189	231
20	43	221	173	143	107	21	180	118	31	26	68	48	152	26	20	85	29	19	172	190	168	187	153	195	135	105	107	105	124	147	128	118	159	165	137	133	214	156	125	172	179	197	164	41	134	180	185	190	233
20.25	45	223	175	145	110	22	182	119	32	27	69	45	155	30	20	86	30	19	172	191	169	187	153	196	138	107	108	107	127	147	129	119	159	164	138	134	216	158	127	174	181	198	166	41	135	179	184	191	236
20.5	44	223	177	148	112	22	183	120	30	27	69	46	155	30	20	86	30	19	174	192	171	188	154	197	139	108	108	107	127	147	131	120	162	166	139	136	216	159	128	175	181	200	166	42	136	182	187	194	235
20.75	44	224	178	149	115	22	185	122	32	27	71	46	156	31	21	88	30	18	175	193	171	188	155	198	141	108	109	108	128	149	132	121	161	167	140	137	218	159	129	176	183	200	168	42	136	182	187	194	237
21	44	225	179	150	115	22	186	124	32	27	71	46	158	32	20	88	29	18	175	193	172	189	156	198	143	109	109	108	129	149	133	122	162	168	141	139	218	160	129	176	183	200	169	42	138	184	188	197	237
21.25	42	226	180	152	118	21	187	125	31	26	73	48	157	33	18	90	31	17	177	195	175	192	158	201	142	110	110	109	130	151	134	122	165	170	143	142	218	159	130	176	184	202	170	46	140	186	191	199	237
21.5	46	227	182	155	120	24	190	127	32	28	75	47	161	37	21	90	31	19	177	195	175	191	158	201	147	112	111	111	132	151	136	124	163	170	144	144	221	163	133	178	185	204	171	45	139	186	190	201	239
21.75	43	229	182	156	122	22	190	128	31	26	75	48	160	37	19	91	31	18	179	196	177	192	159	203	146	112	111	111	132	152	137	125	166	171	145	145	222	162	133	179	186	204	173	47	140	188	192	202	238
22	45	230	184	159	125	25	194	132	35	30	80	50	163	40	21	93	34	20	181	199	179	195	163	206	149	115	113	114	134	154	140	128	168	174	148	149	222	165	136	181	189	205	175	52	144	189	195	205	239
22.25	43	230	185	160	125	24	193	132	32	28	80	47	162	41	20	94	32	18	181	199	178	195	163	206	149	114	113	113	134	154	141	127	167	173	147	150	223	164	136	181	189	204	175	53	143	189	194	205	240
22.5	43	231	186	162	128	23	193	133	33	27	81	49	163	42	19	95	34	17	182	201	181	197	164	207	150	115	114	113	135	156	141	127	168	175	149	151	223	165	137	181	190	206	176	57	145	192	196	208	239
22.75	45	233	188	164	131	25	196	135	34	28	83	48	167	45	21	96	34	19	183	202	181	197	164	207	154	119	115	116	137	157	143	129	168	175	151	153	226	167	139	183	191	208	177	59	146	191	197	209	242
23	44	233	189	166	132	25	198	137	32	27	85	50	166	46	20	98	34	18	185	203	182	199	166	209	154	119	115	117	138	157	144	131	169	177	152	156	226	167	140	184	191	208	178	63	147	194	200	211	241
23.25	44	234	189	167	133	26	198	137	31	26	85	48	167	49	19	98	32	18	185	203	183	198	166	210	156	120	115	117	138	158	146	130	168	177	152	155	227	168	139	184	191	209	179	65	147	193	199	212	242
23.5	44	236	192	170	137	27	200	139	33	27	88	49	169	50	21	100	35	19	186	205	185	200	168	211	159	122	118	118	141	160	147	132	170	178	154	158	229	169	143	186	194	210	180	69	148	195	201	213	244
23.75	45	237	194	173	139	30	202	142	34	28	91	49	172	54	21	102	37	20	188	207	187	201	170	212	160	125	119	120	142	161	149	134	171	179	155	160	231	170	144	188	196	212	182	73	150	196	202	215	247
24	47	238	196	176	141	31	204	143	35	29	93	50	174	57	23	103	38	20	189	207	188	203	171	214	164	126	120	122	144	162	151	136	172	181	157	162	232	173	147	188	198	213	182	77	151	197	203	217	247
24.25	45	238	196	175	142	31	205	145	35	29	94	52	173	57	22	103	38	20	191	209	189	204	173	216	163	125	119	122	144	163	152	136	172	183	158	166	231	171	146	188	198	213	183	80	153	198	205	219	245
24.5	44	239	197	177	143	31	205	145	34	29	96	52	173	59	21	106	39	19	191	210	190	204	173	216	164	126	121	122	144	164	153	136	173	182	158	166	232	172	148	190	198	214	184	82	154	199	206	219	246
24.75	47	240	199	180	145	34	207	146	35	30	98	51	177	61	21	106	39	20	192	210	190	204	174	217	168	130	122	125	147	165	154	138	172	183	159	168	234	175	149	191	199	215	185	84	154	199	205	221	248
25	45	241	199	180	148	36	210	150	38	31	102	57	176	63	22	109	42	22	195	214	194	209	178	220	167	129	123	125	148	168	157	140	177	187	162	172	233	173	152	192	200	216	187	89	157	203	210	224	247
25.25	44	242	200	183	148	35	209	150	35	28	101	56	176	64	21	110	41	20	195	214	195	207	178	221	168	131	122	125	148	168	157	139	175	187	163	173	235	175	152	192	200	215	187	90	157	203	210	224	247
25.5	47	243	203	185	151	39	212	153	39	32	105	56	179	68	23	111	44	22	197	215	197	211	179	223	172	133	125	129	151	170	160	142	177	188	165	176	236	176	154	193	203	218	189	95	159	205	212	227	248
25.75	45	244	205	187	153	40	212	154	37	31	107	57	179	70	23	114	45	22	198	217	198	212	181	224	172	134	127	129	152	172	161	143	178	189	166	177	237	177	156	195	205	219	190	97	160	205	213	228	250
26	46	244	204	187	153	40	214	155	37	32	107	56	181	71	22	113	44	21	198	216	198	210	180	223	175	135	125	130	153	171	161	144	177	188	166	178	239	179	156	195	205	218	190	99	160	206	212	229	251
26.25	48	246	207	190	155	43	216	156	37	31	109	57	184	74	23	115	46	22	200	218	199	212	182	225	177	138	127	132	155	174	164	144	177	189	167	179	240	181	158	197	206	220	192	102	162	207	213	230	253
26.5	44	245	206	189	155	42	215	156	36	29	109	58	182	73	21	114	44	20	199	218	199	212	182	225	176	136	125	130	153	173	164	144	177	190	167	180	237	179	157	195	205	219	191	103	162	206	213	230	249
26.75	48	247	208	192	159	46	218	160	39	33	113	61	184	76	23	117	48	23	203	221	203	214	185	227	179	140	128	134	157	177	167	147	180	192	170	184	239	181	160	197	207	221	194	107	166	209	216	233	251
[truncated: 2,960 more rows]
[truncated: 47 more columns]

## Sheet: BIOLOG raw data - ICC180
Data File	J:\Service\Customer\400\411\data\assays\9994\cspp_SIDx6422x166180___1_37_994_209_Janx11x2013_A_01A.oka
Set up Time	Jan 11 2013 4:45 PM
Position	1-A
Plate Type	PM01-
Strain Type	NOT APPLICABLE
Sample Number
Strain Name	Cspp
Strain Number	SID_6422_166180
Other
Hour	A01	A02	A03	A04	A05	A06	A07	A08	A09	A10	A11	A12	B01	B02	B03	B04	B05	B06	B07	B08	B09	B10	B11	B12	C01	C02	C03	C04	C05	C06	C07	C08	C09	C10	C11	C12	D01	D02	D03	D04	D05	D06	D07	D08	D09	D10	D11	D12	E01
0	16	9	0	0	0	0	0	0	0	4	8	17	14	0	0	0	0	0	7	2	0	1	6	13	11	0	0	9	0	0	0	0	0	0	6	16	13	0	0	0	0	0	0	0	1	0	6	16	17
0.25	16	8	3	0	0	0	1	0	4	3	12	17	16	1	2	0	0	0	5	3	0	1	6	14	13	1	2	10	0	0	0	0	1	0	6	15	12	0	2	0	0	0	0	0	3	0	8	16	13
0.5	18	8	5	2	0	0	3	1	5	5	15	21	19	2	4	0	0	0	5	5	1	3	9	16	14	1	4	13	0	3	0	0	3	1	9	17	15	0	3	1	0	1	0	0	5	1	11	18	15
0.75	18	10	4	3	0	0	2	3	6	7	15	22	17	4	3	2	0	0	6	6	3	4	11	18	14	3	3	15	0	0	0	0	3	4	11	21	15	1	2	1	0	0	0	1	4	3	10	23	20
1	19	12	5	4	0	0	2	3	6	7	15	23	19	4	4	3	0	0	5	7	3	4	11	19	15	4	4	15	0	0	0	1	4	4	11	21	16	1	3	3	1	1	0	1	4	3	10	22	20
1.25	21	12	10	6	3	5	8	7	12	11	25	27	22	6	7	5	0	4	4	11	6	8	15	24	19	5	7	17	2	5	2	5	9	6	14	25	19	3	6	4	5	3	3	4	9	6	15	26	22
1.5	21	14	10	7	6	4	6	6	12	12	22	27	21	8	6	5	0	4	5	11	6	6	16	23	20	6	7	17	2	4	3	5	9	7	13	27	18	3	5	6	7	4	3	3	8	7	13	27	23
1.75	28	17	15	11	15	12	15	14	21	19	28	34	28	15	12	8	6	10	7	14	15	10	22	31	24	14	14	20	8	10	7	12	14	11	21	32	24	5	9	13	13	9	5	8	14	14	17	31	26
2	34	21	19	18	22	18	21	23	30	25	33	42	35	26	18	15	12	15	13	17	26	16	27	40	27	18	21	22	14	14	10	21	17	19	31	37	32	6	16	20	20	17	6	15	22	22	22	38	29
2.25	37	24	20	24	28	21	27	29	34	28	33	45	38	31	22	20	18	18	19	19	34	19	30	46	30	20	26	26	19	13	14	26	18	26	39	42	38	6	21	24	26	24	7	21	27	28	26	42	34
2.5	43	28	26	29	36	31	35	36	41	35	37	50	46	38	27	24	21	24	23	23	40	26	35	52	35	22	36	32	24	20	17	33	23	33	45	45	45	9	27	26	31	28	9	26	34	33	30	47	38
2.75	42	30	28	33	40	36	41	40	47	38	41	52	48	42	25	25	22	26	22	26	43	28	39	56	36	21	39	36	26	21	18	38	26	38	49	52	50	8	26	26	33	28	9	26	36	36	30	53	41
3	43	33	33	38	45	42	48	42	52	43	44	52	53	46	28	25	22	31	25	28	44	29	41	58	41	22	46	41	26	25	23	42	29	44	49	56	54	9	27	27	34	29	10	26	38	38	31	57	45
3.25	43	36	35	42	48	46	48	43	53	44	43	50	55	48	28	25	22	32	26	30	44	29	42	57	44	22	50	45	26	24	24	44	31	48	48	59	59	9	28	27	34	28	9	26	37	37	30	60	47
3.5	44	39	40	46	53	51	54	45	58	48	48	52	58	51	28	26	22	36	26	34	45	30	46	59	49	22	54	50	27	28	27	47	36	53	49	63	63	9	28	27	34	29	10	27	38	38	32	65	49
3.75	42	45	41	49	57	52	54	44	59	50	47	50	57	54	25	26	24	38	22	36	45	27	47	59	51	22	56	54	25	27	30	46	38	58	49	67	67	8	27	27	33	30	10	26	37	39	29	69	50
4	43	47	47	53	60	56	61	44	64	53	53	52	60	56	27	27	24	43	24	39	46	28	50	59	57	23	60	61	26	30	35	47	43	62	49	70	70	9	27	28	34	29	11	27	38	40	30	74	51
4.25	44	53	50	57	64	61	63	45	66	57	54	51	62	59	26	27	26	47	23	42	46	29	53	60	61	22	64	65	26	31	38	47	48	66	49	72	75	10	27	29	34	29	11	26	38	40	30	78	51
4.5	44	56	57	60	68	66	72	46	73	63	63	55	65	60	29	27	25	54	26	47	48	31	58	62	67	23	68	70	28	38	43	50	54	71	51	76	80	11	29	30	36	31	12	28	41	41	33	83	52
4.75	45	59	64	64	72	71	77	48	77	68	67	54	68	63	31	28	25	59	30	50	49	31	61	63	79	24	72	75	28	42	47	50	58	74	51	79	84	11	31	29	36	31	13	28	42	41	33	86	53
5	46	64	68	68	76	75	80	48	79	72	72	55	70	66	30	28	27	73	26	53	50	32	65	63	112	24	75	81	28	43	53	49	62	79	51	83	88	11	30	29	37	32	12	27	42	41	33	89	51
5.25	46	70	71	71	80	77	81	47	80	75	74	54	81	69	29	29	28	94	26	56	50	31	69	63	154	25	78	86	27	44	58	48	64	83	51	87	92	11	29	30	37	32	13	28	41	42	31	92	53
5.5	45	74	76	77	83	82	85	48	83	80	79	53	99	73	29	28	29	114	26	59	51	31	73	63	177	26	82	91	28	47	64	49	67	89	51	91	97	12	30	30	36	33	13	29	42	43	32	96	54
5.75	46	78	80	98	87	86	89	50	85	83	83	52	114	74	29	30	28	133	26	62	51	32	77	64	190	26	85	96	27	49	68	50	69	94	51	95	100	12	31	31	37	33	14	29	42	42	32	98	54
6	46	81	86	119	92	91	94	54	90	86	90	55	124	78	31	30	28	143	27	66	53	33	81	66	197	27	89	102	28	53	73	50	74	100	52	100	104	13	31	31	38	34	15	29	44	43	34	103	54
6.25	49	85	93	137	95	96	97	57	91	89	94	54	136	81	32	31	29	153	31	68	54	32	84	66	206	27	94	107	29	56	78	51	77	106	53	104	110	14	33	34	39	34	15	29	45	44	34	106	55
6.5	48	87	98	151	99	100	102	60	94	91	98	55	145	84	33	32	31	161	32	70	55	33	87	67	212	27	98	112	29	60	82	51	80	113	54	109	114	14	33	34	39	35	15	30	46	44	35	109	55
6.75	49	90	105	163	105	106	107	65	97	95	103	56	155	87	34	33	31	169	33	74	58	34	91	68	218	30	102	117	31	66	87	53	84	120	54	114	119	15	34	36	41	36	17	31	49	46	37	113	56
7	49	92	109	174	107	109	109	69	98	96	106	54	163	90	33	32	31	176	33	75	59	32	92	68	223	28	104	120	28	69	90	52	85	124	53	117	123	15	33	35	40	35	17	31	48	44	35	115	55
7.25	50	94	113	182	111	114	114	73	102	99	110	56	170	93	34	33	32	182	33	76	61	33	96	70	227	29	107	123	30	73	94	52	87	131	54	121	128	16	34	35	40	35	17	31	49	45	36	119	55
7.5	49	95	118	188	114	117	119	80	104	101	113	56	175	93	34	32	31	187	32	77	62	33	98	71	230	29	111	127	29	79	97	54	89	137	54	125	130	15	34	36	40	36	17	31	51	44	36	122	55
7.75	50	96	121	194	120	123	127	87	112	106	120	60	180	96	36	34	32	193	32	80	65	36	102	74	232	30	114	130	32	85	102	56	92	142	56	131	136	16	35	37	41	37	18	33	55	46	39	127	56
8	49	98	124	201	124	126	127	92	111	107	120	57	185	99	34	33	33	199	30	81	66	35	104	74	236	29	118	133	31	88	106	55	93	147	54	135	140	15	34	37	40	37	18	32	54	47	37	130	57
8.25	51	99	128	203	127	131	135	98	117	111	126	60	190	100	37	35	32	203	36	83	69	36	108	76	237	30	122	136	32	95	109	56	96	153	56	139	145	17	37	36	41	38	18	33	57	46	39	135	56
8.5	50	103	131	210	132	135	135	102	115	112	125	56	197	103	35	35	33	208	35	84	70	34	110	77	241	30	126	139	32	98	112	55	97	157	56	142	151	17	36	37	41	38	20	32	55	47	37	137	58
8.75	50	105	133	213	134	139	139	108	118	113	128	57	200	105	36	35	35	212	35	85	71	35	112	78	243	30	130	141	32	102	116	56	99	160	56	146	154	16	36	37	41	38	19	33	57	47	38	140	57
9	50	107	137	217	138	142	143	114	120	114	130	57	204	107	36	35	34	216	35	86	74	35	114	80	244	30	134	143	32	106	118	56	100	165	57	150	158	17	35	38	41	39	20	33	58	47	38	143	57
9.25	50	109	138	219	142	147	150	120	127	117	134	59	206	108	37	35	33	220	34	89	76	38	118	83	243	31	135	144	33	110	120	58	102	168	56	154	161	17	36	38	41	39	21	33	61	48	39	148	57
9.5	51	112	141	223	146	150	152	125	127	118	134	58	211	111	37	35	34	224	36	90	77	36	119	85	247	31	140	147	33	111	123	58	104	172	57	158	166	17	36	39	41	38	21	33	60	48	39	150	58
9.75	50	114	141	224	149	152	156	129	131	119	137	59	212	112	36	35	35	226	31	90	79	37	121	87	246	31	142	149	33	114	124	58	105	175	57	162	169	16	36	38	41	39	21	32	61	49	40	155	58
10	50	118	145	227	153	157	159	134	131	121	137	57	217	115	37	36	36	231	35	92	81	36	123	88	249	32	147	152	34	117	127	57	108	178	57	165	174	18	38	38	42	39	22	34	62	49	39	156	58
10.25	50	120	146	228	156	159	163	139	134	122	139	58	218	116	36	35	36	234	32	94	83	37	125	91	249	32	149	153	33	119	129	57	108	181	57	168	176	17	37	38	41	40	21	33	63	49	39	161	58
10.5	49	121	147	230	159	162	167	143	136	123	141	58	220	118	36	34	36	237	31	94	85	35	127	94	250	32	152	154	33	121	130	58	111	183	57	171	181	17	36	39	42	40	21	32	64	49	38	164	59
10.75	50	124	149	231	163	166	171	148	139	124	142	58	222	120	37	36	37	239	32	95	88	37	129	96	251	32	156	155	33	123	131	58	113	185	58	173	183	17	36	39	42	40	23	34	64	49	39	166	57
11	51	126	150	231	166	170	178	155	145	126	146	60	223	120	39	36	37	240	34	98	91	39	131	101	250	32	158	157	34	126	133	60	116	188	58	176	186	17	37	40	43	40	21	35	68	50	42	170	58
11.25	52	128	152	234	169	172	178	159	144	127	146	58	226	123	38	36	39	243	36	99	92	37	133	102	252	33	163	158	34	127	135	59	117	191	58	178	190	19	37	39	42	40	22	34	67	49	40	172	58
11.5	50	131	153	235	171	175	181	163	147	128	147	58	228	125	38	36	40	245	36	99	95	37	134	104	252	32	165	159	34	128	136	59	120	192	57	180	192	18	37	39	42	40	22	35	68	50	40	174	58
11.75	51	133	156	236	174	178	184	168	149	130	149	58	230	127	39	36	42	248	37	101	98	37	137	109	253	32	168	160	34	129	139	60	123	194	58	183	196	18	37	40	43	40	23	34	69	50	40	177	58
12	50	134	155	236	178	180	193	174	155	131	155	63	228	128	41	37	44	248	35	103	101	40	140	115	251	33	170	161	35	130	140	62	128	198	60	187	198	19	38	40	44	41	23	36	74	51	43	183	60
12.25	51	139	156	238	180	182	191	176	153	131	151	59	231	131	38	37	48	250	34	103	102	38	141	115	253	33	171	162	34	131	141	60	128	197	58	188	199	18	36	40	42	40	23	35	71	49	40	182	57
12.5	52	141	160	239	183	185	194	181	157	134	154	60	233	134	40	38	51	253	38	104	105	38	144	121	255	33	176	164	35	133	144	60	132	200	59	191	202	18	39	41	43	41	25	36	73	51	42	185	58
12.75	51	143	160	240	186	187	197	184	160	136	156	61	234	137	40	39	54	255	34	106	108	39	147	124	255	34	177	165	35	134	145	61	135	202	59	193	205	19	38	42	44	41	25	36	74	51	42	187	59
13	51	145	162	241	188	189	199	187	160	137	157	59	235	142	40	38	56	256	38	106	110	38	149	127	255	34	180	166	35	134	147	61	137	203	58	194	207	20	38	40	44	40	24	35	75	50	42	188	58
13.25	52	146	163	241	191	190	202	190	164	140	158	59	236	144	40	38	61	258	39	109	113	39	151	131	256	33	182	168	35	136	148	60	140	204	59	196	208	18	40	40	44	42	24	36	77	51	42	191	59
13.5	52	148	164	242	193	192	204	193	165	142	158	59	237	148	40	38	62	259	38	109	116	39	153	134	256	33	184	168	35	137	148	60	141	205	59	197	210	19	37	40	44	41	23	35	77	51	41	192	58
13.75	51	148	164	243	196	194	207	197	168	143	161	60	237	150	40	37	66	260	34	112	119	39	156	139	256	33	186	170	34	138	150	62	143	208	59	201	212	19	38	41	44	42	24	35	79	52	42	196	59
14	51	150	165	243	198	195	209	200	170	147	162	60	238	153	40	38	69	261	34	113	122	40	159	142	256	33	188	172	36	138	151	62	144	209	59	202	213	18	38	41	43	42	23	35	81	52	42	198	59
14.25	52	148	165	243	200	197	215	203	174	149	166	61	237	154	43	39	71	262	36	115	125	40	162	147	254	34	189	172	36	141	153	63	146	210	61	205	214	19	39	41	44	42	23	37	86	52	44	201	59
14.5	50	151	167	245	203	199	215	205	175	152	164	60	240	158	41	38	75	265	34	117	129	40	164	150	256	34	191	174	36	141	155	62	148	211	61	206	216	20	39	42	44	42	24	36	86	53	43	203	61
14.75	52	150	168	245	204	201	216	207	176	153	166	60	240	160	41	39	79	265	38	119	131	40	167	153	256	34	193	176	36	144	156	63	149	211	60	207	216	20	40	40	43	43	24	36	89	52	43	203	59
15	52	152	170	246	206	203	218	211	179	155	167	60	241	162	43	39	83	267	40	121	134	41	169	157	257	34	196	178	37	146	158	63	150	213	61	211	218	21	41	42	45	43	25	37	93	53	44	206	60
15.25	50	152	170	247	208	203	219	212	181	155	168	60	241	163	41	39	85	267	34	122	137	40	171	160	257	34	196	178	36	146	159	63	150	215	61	211	218	19	38	41	44	43	24	36	94	53	43	208	59
15.5	51	153	170	248	211	204	221	214	182	156	169	60	241	164	41	39	89	269	35	123	140	40	173	164	257	35	198	180	35	147	161	62	150	215	60	213	219	19	39	41	44	43	24	36	97	52	43	209	60
15.75	52	152	172	247	212	206	224	218	186	159	172	61	241	165	43	40	90	269	40	125	143	42	175	168	256	34	199	181	36	150	163	64	152	217	62	215	219	20	40	42	45	42	25	37	102	53	45	212	59
16	51	151	171	246	214	207	228	220	191	161	175	65	240	164	44	39	93	269	38	126	146	43	177	173	255	34	199	183	37	152	164	64	153	218	63	218	220	21	40	42	45	44	24	37	111	54	46	216	59
16.25	50	154	174	249	216	209	225	220	189	160	173	60	243	169	41	39	99	272	35	126	150	40	178	173	259	34	203	185	36	154	166	63	153	219	61	219	222	20	40	42	44	43	24	37	109	54	43	215	61
16.5	52	151	173	247	217	208	229	224	193	160	178	63	241	165	44	39	101	269	37	127	151	43	179	179	254	34	201	185	35	156	165	64	153	219	63	221	220	19	40	40	45	43	24	37	116	53	45	217	57
16.75	51	153	175	249	219	211	229	225	195	161	179	62	242	169	43	40	104	272	36	128	156	43	181	181	256	34	204	188	37	157	169	65	154	221	63	222	222	20	39	43	44	43	24	37	119	54	44	219	60
17	51	155	176	250	221	212	229	226	195	162	179	62	244	171	43	39	111	274	37	128	159	42	181	182	258	34	207	190	37	158	169	64	154	221	61	223	223	21	40	42	46	44	24	38	121	54	44	220	59
17.25	51	154	176	250	221	213	229	227	195	161	179	59	244	170	43	39	115	273	39	128	159	40	181	184	258	34	209	191	36	159	170	63	153	221	61	223	222	20	41	41	44	44	24	35	123	53	44	220	58
17.5	50	154	177	251	224	214	230	229	198	162	181	61	245	171	42	39	121	274	36	128	163	41	183	188	258	34	209	192	36	160	172	64	154	222	61	224	224	20	40	41	44	44	24	37	128	54	43	222	59
17.75	52	155	178	251	226	215	231	230	199	163	181	61	245	173	43	39	129	275	36	129	166	41	183	191	258	34	210	194	36	162	173	65	155	223	62	226	224	20	40	42	45	44	25	37	132	55	44	223	58
18	52	155	177	251	227	216	233	232	202	163	184	61	244	172	44	40	134	275	38	129	170	43	184	194	258	34	211	195	37	164	174	65	156	224	63	227	225	21	42	42	46	45	25	38	139	54	45	225	59
18.25	51	155	179	252	228	216	233	232	203	163	184	61	246	173	44	39	141	276	40	129	173	42	184	195	258	34	213	197	36	163	175	65	156	224	62	228	224	20	41	42	46	44	24	37	140	53	45	226	58
18.5	51	154	178	250	229	217	236	235	206	164	187	63	244	171	45	40	145	275	39	130	175	43	186	200	256	34	212	197	36	165	175	66	157	225	63	230	224	20	41	42	45	43	24	37	147	55	45	229	58
18.75	52	156	181	253	231	219	234	235	205	163	185	60	248	175	44	40	153	278	39	131	178	41	186	199	260	35	217	199	36	165	177	65	156	225	62	230	226	21	41	43	45	43	24	37	148	54	44	228	61
19	51	156	181	254	233	220	234	236	208	164	186	61	247	175	44	40	159	278	37	131	181	42	187	203	258	35	217	201	37	166	177	65	157	226	63	231	226	21	41	43	46	45	25	38	152	55	44	230	59
19.25	52	156	182	253	233	221	235	237	209	164	188	61	247	174	44	41	164	279	41	131	183	42	188	204	259	35	218	202	37	167	179	66	157	227	63	232	226	22	42	42	46	44	25	38	155	56	45	231	58
19.5	52	154	181	251	234	220	239	238	212	165	190	64	244	172	45	41	165	277	39	132	185	44	188	209	255	35	217	202	37	168	178	67	158	228	65	234	225	21	42	43	46	45	25	39	163	55	46	234	59
19.75	52	155	183	255	235	222	235	238	210	164	187	60	248	175	44	40	174	279	39	131	187	41	187	207	259	34	219	205	36	167	180	65	156	228	63	233	227	20	40	42	45	44	25	37	162	54	44	232	59
20	52	156	184	253	236	222	237	239	214	164	190	62	247	174	45	40	178	279	41	132	189	43	189	212	258	35	220	205	36	167	180	66	157	228	64	236	227	22	41	42	45	44	25	38	167	56	46	236	59
20.25	51	156	185	255	237	223	237	239	214	165	189	60	248	176	45	41	186	280	41	132	191	42	188	212	259	35	222	207	36	169	180	66	158	228	63	236	227	21	41	43	46	45	25	38	168	55	45	234	58
20.5	51	157	186	256	238	224	237	240	215	164	189	60	248	176	44	41	190	280	40	133	194	42	188	214	260	36	222	208	37	169	182	66	158	229	63	237	228	21	41	43	46	44	24	38	172	55	45	237	59
20.75	51	157	186	256	239	225	237	240	216	164	189	60	249	177	45	41	195	280	40	133	195	41	189	216	259	35	222	209	36	169	181	66	158	229	64	237	228	22	41	42	45	44	24	38	174	55	45	237	59
21	52	156	187	257	240	225	238	241	218	165	190	61	249	177	45	40	199	281	40	133	198	42	189	218	259	35	224	210	36	170	183	67	158	229	63	239	227	21	42	42	46	46	25	38	178	55	46	239	60
21.25	50	158	187	257	240	226	238	241	218	165	189	60	249	178	45	40	204	281	36	132	199	42	189	219	260	34	224	211	36	169	183	66	158	230	62	239	228	20	39	43	45	44	24	38	180	55	44	239	59
21.5	50	157	187	257	241	226	239	242	220	165	190	61	248	177	44	41	207	281	37	133	201	43	190	221	259	35	223	211	36	170	183	66	158	231	64	240	227	20	41	43	45	44	25	38	183	56	45	241	58
21.75	51	156	188	256	241	227	241	244	222	166	191	62	248	176	45	41	211	281	39	133	203	45	191	223	258	34	224	212	36	172	184	67	159	231	65	242	228	21	41	43	46	45	24	39	188	57	46	243	58
22	51	157	189	258	243	227	240	244	222	165	189	60	249	178	45	41	216	282	41	132	204	42	190	224	260	34	226	213	36	172	184	66	159	232	63	242	229	21	42	42	46	45	25	38	189	56	46	243	58
22.25	52	157	190	258	243	228	240	244	222	165	190	60	250	178	45	40	220	282	40	132	206	42	190	226	260	34	226	214	36	171	184	66	159	231	63	244	228	21	41	42	46	46	24	38	191	56	45	244	57
22.5	52	158	191	259	244	229	241	245	225	166	192	62	250	179	46	41	223	283	37	134	208	44	191	228	259	36	227	215	37	172	185	67	159	232	65	245	229	21	42	44	46	46	25	39	195	57	47	246	59
22.75	51	157	191	258	244	229	241	245	224	166	191	61	250	178	45	40	224	283	40	133	209	43	191	228	259	34	227	215	36	172	186	66	159	233	64	245	229	22	42	43	46	46	24	38	198	56	46	246	59
23	51	157	192	259	245	230	241	245	225	166	191	61	250	179	45	41	228	283	40	134	211	43	190	229	260	34	228	217	36	172	185	67	159	232	65	246	229	21	42	43	46	46	24	38	199	56	45	247	59
23.25	52	158	193	260	246	230	242	246	226	166	191	62	251	180	46	41	232	284	41	134	213	43	192	231	260	34	229	218	35	172	187	67	160	234	64	247	230	22	43	43	46	46	25	38	203	58	46	248	59
23.5	50	157	192	257	245	230	244	246	228	166	193	63	249	179	46	41	233	283	37	135	214	44	193	233	259	35	228	217	35	172	186	68	160	235	67	249	229	22	42	43	45	46	24	38	207	59	47	250	61
23.75	53	159	193	259	246	231	242	247	226	166	191	60	250	181	47	40	239	283	41	134	214	43	192	233	260	35	229	218	36	172	186	66	159	232	64	248	228	20	42	42	46	45	25	38	206	57	44	249	56
Data File	J:\Service\Customer\400\411\data\assays\10001\cspp_SIDx6422x166180___1_37_001_209_Janx15x2013_A_01A.oka
Set up Time	Jan 15 2013 2:37 PM
Position	1-A
Plate Type	PM01-
Strain Type	NOT APPLICABLE
Sample Number
Strain Name	Cspp
Strain Number	SID_6422_166180
Other
Hour	A01	A02	A03	A04	A05	A06	A07	A08	A09	A10	A11	A12	B01	B02	B03	B04	B05	B06	B07	B08	B09	B10	B11	B12	C01	C02	C03	C04	C05	C06	C07	C08	C09	C10	C11	C12	D01	D02	D03	D04	D05	D06	D07	D08	D09	D10	D11	D12	E01
0	16	6	1	1	0	0	0	0	1	2	11	18	15	2	0	0	0	0	0	1	0	2	7	16	12	0	1	7	0	0	0	0	0	0	8	15	13	0	0	0	0	0	0	0	0	0	5	15	14
0.25	16	6	3	3	0	0	3	2	2	4	15	20	19	1	3	1	0	0	0	5	0	3	12	19	14	0	5	9	0	6	0	0	2	3	16	14	15	4	2	0	0	0	0	3	3	0	11	15	13
0.5	17	8	4	6	0	0	1	3	2	6	15	21	20	3	2	5	0	0	0	5	0	3	15	20	19	1	7	11	0	11	0	0	2	11	21	17	20	11	3	0	0	0	0	7	1	2	10	21	15
0.75	19	9	5	8	0	0	4	6	2	8	16	22	20	4	3	7	0	0	0	5	0	4	16	20	22	3	9	12	0	12	0	1	3	13	25	17	22	3	4	0	0	0	0	4	2	3	11	20	18
1	18	10	7	10	1	0	7	4	6	10	19	24	21	5	3	8	0	0	0	7	2	5	19	23	25	3	11	13	0	14	0	3	5	7	27	22	16	4	4	1	0	3	1	3	4	5	12	25	20
1.25	20	10	8	11	2	1	8	5	8	11	20	26	21	6	5	10	0	1	0	8	3	5	20	23	25	4	12	13	1	1	1	4	7	8	27	23	17	4	5	3	1	4	3	3	4	6	13	25	21
1.5	23	14	13	13	4	5	10	8	8	14	23	27	24	9	6	12	0	5	2	11	4	7	23	26	29	7	15	17	4	5	4	5	10	10	28	25	20	6	7	4	4	7	5	5	6	7	14	26	24
1.75	25	15	14	13	9	9	12	12	16	19	26	30	28	15	7	14	2	8	2	12	8	8	26	29	30	10	17	17	4	6	4	10	12	13	31	29	22	7	7	5	5	7	5	7	6	12	15	26	27
2	33	19	18	18	15	16	18	22	24	24	28	37	34	23	9	17	6	11	5	14	18	11	30	37	33	13	22	20	9	9	9	16	15	21	40	35	30	7	11	11	12	13	6	11	12	19	16	33	36
2.25	35	21	22	22	22	25	28	30	30	28	34	39	40	30	12	20	6	18	8	17	25	17	35	45	37	13	31	24	14	15	12	24	19	27	47	38	37	7	16	12	17	19	7	17	18	22	17	38	40
2.5	35	24	23	26	27	29	32	34	36	31	33	39	42	35	10	20	6	18	7	18	26	15	36	47	38	14	35	28	14	14	14	29	20	33	47	43	44	8	15	11	17	18	8	16	17	24	17	43	46
2.75	33	27	26	31	32	34	39	37	42	34	34	39	45	38	10	20	7	21	8	21	28	16	38	48	39	14	40	33	14	16	16	34	22	39	48	47	48	8	14	12	18	19	7	16	17	25	17	48	51
3	34	29	30	35	37	40	44	38	48	37	38	42	49	42	11	22	8	24	8	24	29	16	41	49	44	15	44	39	14	17	18	39	26	44	49	53	54	9	15	13	18	18	9	17	18	26	18	54	56
3.25	35	32	35	39	41	46	49	39	50	40	40	40	50	45	12	24	9	29	9	26	28	17	44	49	47	15	51	44	15	22	22	42	30	51	48	56	59	9	16	13	20	20	11	17	20	25	19	57	58
3.5	35	36	39	42	44	50	52	40	55	44	42	41	52	47	12	23	9	31	9	29	30	17	45	51	51	15	54	47	14	23	24	44	33	55	47	59	62	8	15	13	19	20	10	17	19	26	18	62	60
3.75	36	39	44	46	50	56	57	40	59	49	48	42	56	51	13	25	7	36	9	32	29	18	50	52	56	15	58	53	15	26	28	46	38	61	48	63	68	10	17	13	19	20	11	18	19	26	20	66	61
4	37	43	49	52	56	62	63	42	64	54	51	43	60	54	13	28	9	41	11	36	30	19	54	53	62	16	63	59	15	31	33	48	43	66	48	67	73	11	18	14	20	22	13	20	20	27	21	71	64
4.25	37	47	54	54	59	65	66	42	65	57	55	43	60	55	12	27	9	45	10	38	31	18	58	52	67	17	66	62	15	32	36	48	47	71	43	68	76	11	17	13	20	20	12	18	20	27	20	74	63
4.5	37	52	59	58	64	70	71	43	71	62	58	44	63	59	14	26	8	49	10	42	32	19	62	53	76	18	69	68	15	35	41	50	53	74	41	71	80	10	16	15	20	20	14	20	22	27	20	77	64
4.75	38	56	65	65	68	75	75	44	73	68	63	42	70	62	15	27	10	58	10	44	33	20	67	54	113	18	75	74	16	38	46	49	56	80	38	76	85	11	18	15	22	20	14	20	22	28	21	81	65
5	39	59	67	65	73	79	79	43	75	72	67	43	87	64	14	25	9	77	11	48	33	20	72	54	159	18	77	78	14	42	50	49	59	84	35	77	89	11	17	14	21	19	15	20	22	27	20	82	63
5.25	40	63	69	69	75	83	84	46	79	76	72	44	105	67	15	23	8	96	11	51	34	21	78	56	185	19	81	83	15	44	56	50	61	90	35	81	93	11	18	14	21	19	16	19	22	28	22	86	64
5.5	40	68	73	87	82	89	88	46	82	81	77	44	118	71	16	22	11	115	12	54	35	21	82	56	201	20	85	89	16	49	61	50	65	98	37	87	98	12	19	16	23	21	16	20	22	29	22	90	66
5.75	41	72	75	111	85	93	94	48	85	85	83	45	129	73	16	21	11	127	12	57	36	22	87	57	209	19	90	94	16	52	67	52	67	105	40	91	102	13	20	16	22	21	17	20	23	29	23	93	67
6	41	75	78	129	89	97	97	49	87	87	87	44	138	75	16	22	10	134	12	60	37	22	91	56	216	19	93	98	16	56	72	50	69	114	36	93	106	12	20	17	22	21	17	21	23	29	23	96	65
6.25	41	78	80	144	94	102	102	51	92	91	92	46	147	79	17	21	11	142	13	61	37	22	95	58	224	21	97	103	15	61	76	52	73	120	39	100	110	13	20	17	22	21	17	21	24	30	23	101	67
6.5	41	80	83	157	99	105	106	53	94	94	96	45	156	81	17	20	12	148	13	63	38	22	99	58	229	20	102	106	16	65	82	52	76	128	39	103	115	14	20	17	24	22	17	22	24	29	23	101	68
6.75	41	83	87	173	103	111	111	58	95	97	100	45	166	85	17	22	13	155	14	65	40	22	103	58	237	21	106	112	16	70	85	53	79	135	39	108	121	15	20	18	24	22	19	23	25	31	23	106	70
7	43	85	89	181	107	115	116	66	99	100	105	46	173	88	18	21	11	162	14	66	39	22	107	60	241	21	111	115	17	77	90	54	80	142	39	113	125	15	22	18	24	23	19	23	25	33	24	110	71
7.25	42	86	91	187	111	118	120	72	102	104	108	46	179	90	19	21	13	167	14	68	40	23	111	60	243	21	114	117	17	83	94	54	83	149	41	116	129	15	22	19	24	23	18	22	26	31	24	114	70
7.5	41	89	94	194	117	123	125	76	105	106	112	47	186	92	19	20	14	173	15	70	40	23	114	60	248	21	119	121	17	88	99	54	84	155	41	120	133	15	23	18	25	24	18	23	26	32	25	117	71
7.75	42	92	97	201	120	126	129	82	108	109	114	46	191	95	18	21	14	179	14	70	41	23	119	61	251	22	123	124	18	94	103	55	86	162	42	123	139	16	23	19	24	25	18	23	26	32	25	120	72
8	43	93	98	204	125	131	133	87	111	112	118	47	195	97	20	21	13	183	14	73	42	24	122	61	254	21	126	126	19	99	106	55	88	166	42	129	143	15	22	19	25	24	18	23	27	34	26	124	72
8.25	43	96	101	210	129	134	138	93	112	114	121	47	201	98	20	21	15	188	15	75	42	24	125	63	257	21	131	129	19	104	109	56	90	171	43	132	148	16	23	19	25	25	18	24	28	33	26	128	74
8.5	43	98	103	211	132	137	142	99	115	115	123	46	205	100	20	21	14	192	16	75	43	25	128	63	259	22	134	131	19	109	112	55	90	176	43	134	150	16	23	19	24	25	17	23	27	32	25	131	72
8.75	44	102	106	217	136	141	148	106	117	118	125	48	209	103	20	21	15	197	16	77	46	25	132	64	262	23	139	134	19	114	115	57	93	181	42	137	156	17	24	20	25	25	18	24	29	34	26	135	73
9	41	104	106	218	140	144	151	111	121	118	127	49	212	104	20	20	15	200	16	78	47	25	134	65	264	23	141	135	19	116	117	56	93	184	43	141	160	16	23	19	24	25	16	23	28	34	26	138	73
9.25	45	107	111	220	144	150	157	119	123	122	132	49	216	106	23	22	16	206	18	80	49	26	138	67	266	24	148	138	22	122	121	58	95	188	43	145	164	18	26	21	27	27	18	25	31	35	28	143	73
9.5	43	109	112	225	146	151	159	124	125	121	132	48	220	108	20	21	14	209	16	81	49	24	140	66	268	23	150	140	19	123	122	57	96	190	42	148	168	17	23	20	24	25	17	24	27	35	27	146	74
9.75	44	112	114	226	150	156	165	131	128	124	136	48	223	110	23	21	15	212	16	83	52	26	141	68	270	23	155	142	21	128	124	59	98	193	44	152	172	17	25	22	27	26	17	26	29	35	28	150	75
10	44	115	117	229	153	158	168	135	129	124	135	47	226	111	21	21	16	216	16	84	53	25	144	69	271	22	158	142	20	130	125	57	99	196	41	154	175	16	23	21	25	25	18	25	28	35	26	154	73
10.25	43	117	118	230	157	162	172	142	134	127	138	49	228	114	23	21	15	219	17	85	55	26	146	71	272	24	162	144	20	133	127	59	101	199	44	158	179	17	25	21	26	26	17	25	29	36	28	158	75
10.5	45	120	120	230	160	164	176	147	136	128	141	50	230	116	24	22	16	222	17	87	57	27	150	74	273	24	166	146	22	135	129	60	103	202	45	161	181	19	26	22	27	27	17	26	30	35	28	161	76
10.75	44	123	123	233	164	167	180	153	138	130	142	50	233	118	23	22	17	226	17	88	59	25	152	75	275	24	170	148	21	137	131	60	103	205	44	164	185	18	27	21	27	27	18	26	30	37	28	165	75
11	43	125	125	236	167	169	183	158	140	130	141	49	235	119	22	21	17	229	17	89	60	26	154	77	277	24	173	149	21	137	131	59	105	206	43	167	189	18	25	22	26	27	17	25	30	36	28	168	77
11.25	43	126	127	234	169	171	186	162	143	131	143	49	235	120	22	21	17	230	16	90	63	25	155	79	275	24	175	149	20	140	133	58	107	209	44	168	190	18	26	21	26	27	18	25	29	36	28	169	75
11.5	45	129	130	237	172	175	189	168	145	133	145	49	238	123	23	22	17	235	18	90	66	26	159	82	277	25	179	151	21	141	134	60	108	211	45	171	194	19	26	22	27	27	17	26	30	38	30	174	77
11.75	44	132	132	238	175	178	193	174	148	134	148	49	239	125	24	23	17	237	19	93	69	27	162	85	278	26	182	153	22	144	137	61	111	213	46	173	197	20	26	24	27	27	19	26	30	38	29	177	77
12	44	133	133	237	177	178	196	177	150	135	148	49	239	126	23	21	16	237	17	92	72	27	164	86	278	24	183	152	20	145	136	60	113	216	45	174	199	17	25	21	26	27	18	26	30	36	29	177	74
12.25	43	135	135	240	179	181	199	182	153	136	150	50	241	129	24	22	17	240	18	94	73	26	165	90	279	24	186	154	21	145	138	61	116	217	46	177	202	18	26	22	26	26	17	26	30	39	29	182	77
12.5	44	138	138	243	183	183	202	185	154	138	150	50	243	131	24	22	18	243	18	95	76	27	168	92	281	24	190	156	23	147	139	61	119	218	45	180	206	19	26	23	27	28	18	26	31	38	29	184	78
12.75	44	140	140	242	185	185	204	189	157	139	151	49	244	134	24	22	18	245	18	95	78	27	169	95	281	25	192	157	21	147	140	62	121	219	46	181	207	19	26	22	26	27	16	26	31	38	29	187	78
13	46	141	144	241	188	188	207	193	160	141	154	51	245	138	26	22	17	246	18	96	81	28	171	98	281	26	194	158	23	150	141	62	124	221	47	183	208	20	27	23	27	28	18	27	31	38	30	190	78
13.25	45	142	146	243	189	188	210	196	162	142	154	49	246	141	25	23	18	247	18	98	84	27	175	101	281	25	196	160	21	150	142	62	125	223	47	185	211	18	26	22	27	28	18	27	31	37	29	191	77
13.5	44	143	148	244	192	190	212	198	164	144	154	49	247	144	24	22	18	249	17	99	86	27	176	103	282	25	198	161	22	151	142	62	127	223	46	186	212	19	26	22	26	28	17	26	31	38	30	193	77
13.75	44	144	151	247	193	191	213	202	164	146	154	49	249	147	24	22	18	251	17	99	87	26	177	108	284	25	200	163	21	151	144	61	128	224	43	189	215	18	25	23	25	28	17	25	30	37	28	196	78
14	44	144	153	246	196	194	216	204	169	148	157	50	249	150	24	22	17	253	19	101	90	27	180	111	283	25	202	165	21	152	145	62	131	225	47	191	216	19	25	22	25	28	16	26	31	38	30	199	78
14.25	45	146	158	250	199	196	219	208	170	152	157	50	252	152	24	23	19	255	19	103	93	27	182	115	286	25	205	168	22	154	147	63	132	227	46	193	220	19	27	23	27	28	18	26	31	39	30	201	80
14.5	45	146	160	250	200	196	221	211	173	153	159	49	253	154	25	23	18	257	18	105	96	28	184	118	285	26	206	170	22	155	148	63	134	228	47	194	221	20	27	23	27	29	17	27	32	39	30	203	80
14.75	44	146	162	249	203	198	222	213	175	156	159	50	253	155	25	22	18	257	18	106	99	28	187	122	284	26	208	171	22	155	149	63	135	229	48	196	221	20	27	23	26	28	17	27	32	39	31	205	79
15	45	147	165	249	204	200	225	215	176	157	159	49	253	156	26	23	18	258	18	108	102	28	188	125	283	26	209	173	21	157	149	62	135	230	46	196	222	19	27	22	26	29	17	26	32	38	30	205	77
15.25	45	147	169	252	207	202	227	218	178	159	160	49	255	158	26	23	19	260	19	110	105	27	191	129	286	27	212	175	22	159	151	62	136	231	46	198	225	20	27	23	27	29	19	27	32	39	30	207	79
15.5	44	148	171	253	208	203	228	221	181	161	162	50	256	159	26	23	19	262	19	111	108	29	193	134	286	27	213	177	23	159	153	63	137	232	47	200	225	19	26	24	27	29	18	27	33	39	31	210	80
15.75	44	147	172	253	210	205	230	222	184	163	163	51	256	160	26	23	18	263	18	112	110	29	195	136	285	26	214	179	22	161	154	63	138	233	48	202	226	19	27	23	27	29	17	27	32	41	31	212	80
16	46	148	175	254	212	205	231	224	184	163	163	49	257	161	26	23	19	264	18	113	114	28	196	141	286	26	216	180	22	162	154	63	139	234	47	203	228	20	27	23	27	29	17	27	32	39	31	213	79
16.25	45	148	178	255	214	206	232	225	186	164	164	49	257	162	25	23	18	265	19	113	116	27	196	143	286	26	217	182	21	163	156	63	138	234	47	204	228	20	27	23	27	28	17	27	32	38	31	214	80
16.5	45	149	179	256	215	208	233	227	188	165	165	51	259	162	25	24	19	267	19	114	120	28	198	148	287	26	218	185	22	165	158	64	139	235	48	207	229	20	27	22	27	28	17	27	32	39	31	218	81
16.75	44	148	181	256	216	208	234	228	190	165	167	50	259	163	26	23	18	268	19	115	123	29	199	152	286	26	219	185	22	167	158	64	139	235	48	208	229	20	27	23	27	28	17	27	32	39	31	220	81
17	45	149	183	256	218	210	236	231	191	165	167	50	259	164	26	23	19	269	19	115	127	29	201	156	286	27	221	187	22	168	160	64	140	237	47	209	230	19	27	23	27	28	18	27	33	40	31	220	79
17.25	46	150	186	259	221	211	238	232	193	167	169	50	262	166	27	23	21	271	19	116	130	29	202	159	289	27	222	189	23	170	161	65	140	238	48	211	233	21	28	25	27	30	18	27	33	40	32	223	82
17.5	45	150	187	262	221	212	237	233	194	167	169	49	263	166	25	23	20	271	18	116	133	28	202	163	290	27	224	191	22	170	162	64	141	237	46	212	233	19	27	24	26	29	17	27	34	40	30	223	81
17.75	44	150	188	260	223	213	238	234	197	168	171	51	262	166	26	23	19	271	19	117	135	30	203	166	288	27	224	191	23	172	163	64	141	237	48	214	233	20	28	23	27	29	18	27	33	41	32	226	82
18	45	151	191	263	225	215	239	236	197	168	172	50	265	167	27	24	20	273	18	118	139	29	204	170	290	28	225	193	23	172	165	65	142	238	47	216	236	20	27	24	26	29	18	27	34	41	31	227	82
18.25	45	150	191	262	225	215	240	236	200	168	174	51	263	166	27	23	20	273	19	117	141	29	203	173	288	27	226	195	22	174	165	64	142	239	48	217	234	21	28	24	27	29	17	26	36	41	32	228	82
18.5	44	150	193	262	227	215	241	236	200	168	172	49	264	166	26	22	19	273	19	117	145	29	204	175	289	26	227	195	22	176	165	63	141	240	47	217	235	20	27	23	26	29	17	26	36	40	31	229	82
18.75	45	152	195	265	228	217	242	238	202	168	173	50	266	167	27	23	21	275	19	118	149	29	205	178	290	27	228	197	23	177	166	64	142	240	47	219	238	21	28	24	26	30	18	27	38	40	31	230	82
19	45	151	196	264	229	218	242	239	204	169	175	50	265	167	27	23	21	275	19	118	152	29	205	182	289	28	229	198	23	179	168	65	142	241	48	221	237	20	28	24	27	29	18	27	40	41	32	232	82
19.25	44	150	197	265	230	218	243	240	206	169	177	50	265	167	27	23	20	275	19	119	154	30	207	185	289	27	229	199	22	178	169	66	143	241	48	222	238	20	28	24	27	28	19	27	42	41	32	233	82
19.5	45	150	198	265	231	219	243	240	207	169	177	51	265	168	27	23	20	276	19	120	158	29	206	188	290	27	230	200	23	179	170	66	143	241	48	223	238	21	28	24	27	29	18	28	46	42	32	235	83
19.75	47	153	201	268	233	221	244	241	208	169	176	51	268	169	28	25	22	277	19	120	162	30	207	191	291	28	232	203	23	180	171	66	144	243	47	224	240	21	29	25	27	31	19	28	49	41	32	235	84
20	45	151	200	266	233	220	244	241	211	169	177	50	267	168	29	23	20	276	19	120	165	29	208	193	289	27	231	203	22	180	171	66	143	243	47	224	239	20	27	24	27	29	18	28	53	41	32	236	81
20.25	45	151	201	268	234	222	245	242	212	170	178	51	268	169	28	24	21	278	20	121	168	30	207	197	291	28	233	204	23	181	172	66	144	243	48	227	240	21	28	24	28	30	18	29	56	42	33	239	84
20.5	46	152	203	270	236	222	246	243	212	169	177	50	270	169	27	24	22	279	20	119	172	30	208	198	292	27	234	206	23	182	172	66	144	244	46	226	242	21	29	25	27	31	19	28	58	41	32	238	84
20.75	46	150	202	266	236	223	246	243	214	169	179	51	267	168	28	23	21	278	20	121	174	30	207	200	289	27	232	205	24	183	172	65	144	244	49	227	240	21	29	23	28	30	18	28	64	40	33	240	82
21	45	152	203	270	237	224	246	243	216	170	180	51	269	170	28	22	22	279	19	121	177	30	208	203	291	28	234	207	23	181	173	67	144	244	49	229	242	22	28	23	27	29	18	28	66	42	33	243	83
21.25	46	152	204	270	238	224	247	244	217	170	181	50	270	170	27	23	22	279	20	121	180	30	209	205	291	28	234	207	22	183	174	66	144	245	48	230	242	20	29	25	27	30	18	27	69	41	32	243	83
21.5	46	152	205	271	239	225	247	244	218	170	180	50	271	170	28	23	22	280	20	121	182	31	209	207	291	28	235	208	23	183	175	67	145	246	48	231	243	21	29	24	27	31	18	28	73	43	32	245	84
21.75	45	151	205	270	239	225	247	245	219	170	180	51	270	170	29	22	21	280	20	122	184	31	209	210	290	28	234	209	22	183	174	67	144	245	49	232	242	20	28	24	27	30	18	27	75	42	33	246	83
22	45	152	205	271	240	226	248	245	220	170	180	51	271	171	28	23	22	281	20	121	186	31	208	212	291	27	235	210	22	183	176	67	145	245	48	232	243	21	29	23	26	30	18	28	77	42	32	247	84
22.25	46	152	205	273	241	227	249	246	221	170	180	50	273	173	28	22	22	281	19	122	189	29	208	213	292	28	236	212	22	183	176	67	145	246	46	233	245	21	28	25	27	30	18	29	80	42	32	247	84
22.5	46	152	206	272	241	227	249	247	223	170	181	51	272	171	28	22	22	281	20	122	192	31	210	215	291	28	236	212	22	184	176	67	145	247	47	234	244	21	29	24	27	31	20	28	84	42	33	249	83
22.75	45	151	206	272	242	228	249	247	223	170	182	51	272	172	29	22	22	281	20	122	193	30	210	216	291	27	236	212	22	183	176	67	145	248	49	235	243	21	28	24	27	29	19	28	86	43	33	250	84
23	46	153	207	274	243	229	250	247	225	171	182	51	273	173	29	23	22	282	20	123	196	30	210	219	292	28	237	213	23	184	177	68	146	247	48	236	246	21	28	25	28	29	19	29	89	42	33	251	84
23.25	45	152	208	275	243	229	250	247	225	170	181	49	274	173	28	23	21	283	19	122	198	30	210	220	292	27	238	214	22	184	177	66	145	247	46	236	246	20	28	24	27	29	19	27	91	42	31	251	84
23.5	45	151	207	273	244	229	250	247	227	170	182	50	272	172	28	22	22	281	19	123	200	30	211	222	291	27	237	214	22	183	176	68	145	248	48	237	245	20	28	24	27	28	19	27	95	42	33	252	83
23.75	45	152	207	272	243	229	250	247	227	171	182	51	272	173	28	22	22	281	19	122	201	30	210	223	291	27	237	214	21	184	177	67	145	248	48	238	244	20	27	23	27	30	17	27	97	41	33	254	82
Data File	placeholder
Plate Type	1
Hour	A01	A02	A03	A04	A05	A06	A07	A08	A09	A10	A11	A12	B01	B02	B03	B04	B05	B06	B07	B08	B09	B10	B11	B12	C01	C02	C03	C04	C05	C06	C07	C08	C09	C10	C11	C12	D01	D02	D03	D04	D05	D06	D07	D08	D09	D10	D11	D12	E01
Data File	placeholder
Plate Type	1
Hour	A01	A02	A03	A04	A05	A06	A07	A08	A09	A10	A11	A12	B01	B02	B03	B04	B05	B06	B07	B08	B09	B10	B11	B12	C01	C02	C03	C04	C05	C06	C07	C08	C09	C10	C11	C12	D01	D02	D03	D04	D05	D06	D07	D08	D09	D10	D11	D12	E01
Data File	J:\Service\Customer\400\411\data\assays\9994\cspp_SIDx6422x166180___2_37_994_209_Janx11x2013_A_01B.oka
Set up Time	Jan 11 2013 4:45 PM
Position	1-B
Plate Type	PM02-A
Strain Type	NOT APPLICABLE
Sample Number
Strain Name	Cspp
Strain Number	SID_6422_166180
Other
Hour	A01	A02	A03	A04	A05	A06	A07	A08	A09	A10	A11	A12	B01	B02	B03	B04	B05	B06	B07	B08	B09	B10	B11	B12	C01	C02	C03	C04	C05	C06	C07	C08	C09	C10	C11	C12	D01	D02	D03	D04	D05	D06	D07	D08	D09	D10	D11	D12	E01
0	32	30	14	18	13	37	17	19	18	30	25	57	27	13	7	12	21	9	13	11	27	17	30	28	22	8	4	3	6	5	4	7	8	17	14	22	20	7	2	0	0	0	2	0	8	11	16	16	34
0.25	45	41	20	33	22	50	31	33	31	46	38	75	39	22	18	25	36	22	27	26	40	32	45	43	36	17	11	11	16	16	18	19	20	31	27	39	33	18	11	10	8	11	12	9	21	23	31	28	40
0.5	45	41	21	32	23	49	35	36	34	48	42	76	39	22	18	25	37	23	29	26	41	35	46	46	35	16	11	12	17	18	18	21	22	35	29	42	31	15	9	8	9	11	13	11	23	25	33	30	36
0.75	49	44	24	37	26	50	44	40	40	54	51	81	43	24	22	27	42	30	34	33	45	42	51	56	40	19	14	15	21	25	23	26	29	39	35	48	35	16	12	12	14	16	18	16	28	31	38	39	38
1	48	44	25	36	26	49	46	43	40	54	51	80	42	23	21	27	42	28	33	32	45	41	51	52	38	18	13	16	21	24	22	26	28	39	33	47	34	14	12	11	14	17	18	12	29	30	37	38	36
1.25	48	43	24	35	26	48	44	41	39	53	49	80	40	24	18	26	40	26	32	30	44	39	48	48	36	18	12	15	19	22	20	25	26	37	31	45	34	14	11	10	13	14	17	12	27	27	35	35	33
1.5	50	45	28	40	30	50	48	46	44	56	55	86	43	26	21	28	43	30	35	34	46	42	51	52	39	20	14	18	23	27	24	28	30	41	35	48	36	15	13	12	16	18	22	17	30	32	38	41	35
1.75	53	45	33	41	32	54	48	46	43	56	55	87	43	28	19	29	43	26	34	31	43	40	53	48	40	21	15	17	22	24	23	28	28	38	35	45	38	15	15	15	16	15	24	15	27	30	36	35	39
2	58	49	40	49	38	62	54	52	50	61	61	92	49	32	21	35	50	34	40	37	44	46	61	49	47	27	23	25	29	32	29	36	36	44	41	49	45	21	20	22	22	20	32	21	28	37	42	41	44
2.25	64	51	47	54	45	70	60	59	56	65	67	95	54	36	26	41	58	43	44	42	47	51	68	54	51	29	28	30	37	39	39	41	43	51	49	59	50	27	26	29	30	30	40	28	34	45	48	51	48
2.5	65	51	49	57	47	76	61	62	57	66	67	94	55	39	26	42	64	42	45	41	47	50	74	52	51	30	29	32	39	39	44	41	42	52	50	63	51	29	27	29	30	34	43	28	36	44	48	51	49
2.75	65	51	49	57	47	82	61	64	57	66	66	94	54	40	27	42	69	42	44	41	46	50	76	51	51	29	29	31	37	39	49	41	42	52	50	66	51	29	27	29	29	35	47	28	36	43	48	52	45
3	67	52	51	59	48	86	63	68	58	67	68	96	56	43	30	44	74	44	46	43	47	51	79	54	52	31	30	32	40	40	56	43	44	52	53	69	52	30	28	30	31	36	50	30	37	45	50	55	43
3.25	66	50	49	57	47	90	61	67	56	65	64	92	55	44	29	43	76	41	43	40	45	48	78	51	52	30	29	32	38	38	59	40	39	50	49	67	52	29	27	28	28	35	49	27	34	42	47	52	38
3.5	67	52	50	59	49	94	64	68	58	67	68	95	56	46	32	44	80	44	45	42	47	51	79	54	53	30	30	32	39	41	66	43	43	52	52	69	54	30	28	30	30	37	51	29	36	45	49	54	37
3.75	69	53	52	61	50	96	65	70	60	67	70	95	59	48	35	45	82	46	46	44	49	53	79	58	54	31	31	34	41	43	71	44	45	54	55	70	55	31	28	30	32	39	52	32	39	47	52	58	37
4	67	52	51	59	48	102	62	68	58	66	63	91	56	49	34	43	83	42	44	40	45	47	78	57	52	31	30	30	38	37	74	39	39	49	49	67	54	30	27	29	28	34	50	26	33	42	48	53	33
4.25	69	55	52	63	51	105	66	70	61	67	69	95	58	52	40	46	86	45	47	44	49	53	81	65	55	31	31	34	41	42	80	44	44	53	53	70	55	31	29	31	32	39	53	31	39	47	52	58	35
4.5	68	54	53	61	50	108	66	70	60	67	68	94	58	54	40	45	88	44	46	43	47	51	80	68	54	31	31	33	40	39	85	43	43	53	52	69	55	31	28	31	32	37	52	29	37	45	51	55	33
4.75	69	54	53	63	51	111	66	71	61	67	69	94	59	57	44	46	89	45	46	44	48	52	80	72	54	32	31	34	41	41	89	44	44	54	53	71	54	31	29	30	32	39	53	30	38	46	52	57	33
5	69	54	54	62	51	115	67	71	60	67	68	93	58	59	46	45	91	44	47	44	47	51	80	74	54	31	31	33	41	41	93	44	43	53	53	70	54	31	29	31	31	37	53	30	37	45	51	55	32
5.25	72	57	56	65	54	115	68	71	63	68	70	96	61	63	50	47	94	48	48	46	50	54	80	79	57	33	32	34	43	44	98	45	47	55	56	72	57	32	30	32	35	40	54	33	40	49	55	60	34
5.5	72	58	57	66	55	117	68	71	64	68	72	95	61	66	54	48	96	48	48	46	50	54	81	82	58	33	32	36	43	45	101	46	47	55	55	73	57	33	31	32	35	40	55	33	40	48	56	61	34
5.75	72	57	57	65	54	120	67	71	63	68	70	96	62	69	56	48	99	47	48	46	50	53	81	84	57	33	32	35	43	43	104	45	46	54	54	72	57	33	30	32	35	40	54	33	40	47	54	59	33
6	71	55	55	62	51	126	66	71	60	67	66	90	58	71	58	45	103	43	46	41	47	48	79	86	54	32	31	33	41	39	108	41	40	49	50	69	55	31	28	31	30	35	53	28	34	43	51	55	30
6.25	73	59	59	66	57	125	68	71	65	69	71	95	62	75	64	50	106	48	49	47	51	54	82	91	59	34	33	37	44	45	112	46	47	55	55	74	58	34	32	33	35	41	55	34	41	49	57	62	34
6.5	74	59	59	67	57	126	68	72	64	68	72	94	63	79	69	49	111	49	50	47	51	54	82	93	59	34	33	36	45	45	114	47	47	55	56	74	59	34	31	33	36	41	56	34	41	49	58	63	34
6.75	76	62	61	69	58	130	69	73	65	70	73	96	65	84	74	50	117	50	51	48	52	55	82	97	61	36	36	39	46	46	118	47	49	57	57	75	61	36	33	34	37	42	57	35	42	51	59	64	36
7	73	59	59	66	57	133	68	73	63	70	71	94	62	86	78	49	121	47	49	46	51	54	82	98	59	34	33	37	45	44	120	46	46	55	55	72	59	34	30	33	35	41	56	32	40	48	55	60	33
7.25	75	60	62	69	58	133	67	72	65	70	72	95	64	92	84	51	126	49	50	47	51	55	82	101	60	35	34	37	45	46	122	47	48	56	56	75	60	34	32	34	36	41	57	35	41	49	56	63	36
7.5	69	56	58	64	53	140	63	71	60	68	64	90	59	94	87	44	131	42	45	40	47	47	79	100	56	33	32	33	40	37	124	41	40	49	49	70	57	32	28	31	30	35	54	27	33	42	50	54	31
7.75	73	59	61	67	57	140	66	73	63	71	70	94	62	100	93	49	136	46	49	46	51	53	83	106	59	34	34	36	44	42	128	45	45	54	54	72	59	35	31	33	34	40	57	31	39	47	55	59	33
8	75	61	63	69	60	138	66	73	65	70	73	96	65	105	98	50	140	50	51	48	51	55	82	108	61	35	35	39	45	46	130	47	48	57	57	74	61	34	33	34	36	42	57	34	41	49	56	63	35
8.25	72	59	62	68	58	142	65	73	63	69	70	94	62	109	102	48	145	47	49	46	49	53	82	110	59	34	34	36	43	43	133	45	45	54	54	72	59	34	32	33	34	40	57	32	39	47	54	59	33
8.5	72	57	60	65	56	147	63	71	61	68	66	90	62	113	107	45	151	43	46	41	47	47	81	111	58	33	33	34	42	39	135	41	41	49	50	70	58	33	30	32	31	37	55	28	34	44	50	55	31
8.75	71	58	61	65	56	149	62	72	61	69	67	90	62	115	111	47	156	43	47	41	47	48	80	114	57	33	33	34	43	39	137	42	41	49	51	70	59	34	30	32	31	36	55	29	34	45	51	56	31
9	71	58	61	66	56	151	62	72	61	68	66	90	62	119	116	46	160	43	47	43	47	48	81	117	58	34	33	34	42	39	139	42	41	50	50	70	59	34	30	33	32	37	56	29	33	44	51	55	32
9.25	73	60	62	68	59	149	65	74	63	71	71	93	64	122	118	49	164	46	49	46	49	53	83	119	61	34	34	37	45	42	142	46	44	54	54	72	61	34	31	33	33	40	57	30	38	48	53	58	33
9.5	71	58	61	66	56	155	61	72	62	70	66	90	62	124	122	46	169	44	47	41	48	48	81	122	58	34	33	35	43	40	143	42	41	51	51	70	59	34	30	33	31	38	56	29	33	44	50	57	31
9.75	72	58	61	67	57	154	62	72	63	69	68	91	63	126	125	46	171	45	48	43	49	50	82	125	60	34	33	34	43	41	147	43	42	51	52	72	59	34	30	32	32	37	57	29	36	45	51	58	31
10	74	62	64	72	62	153	65	75	67	71	73	96	66	130	129	51	172	50	52	48	52	55	84	128	61	36	36	38	46	46	149	47	48	56	58	76	62	35	33	35	37	43	59	35	42	49	57	63	35
10.25	71	58	60	67	57	158	60	73	62	69	66	90	62	129	129	46	179	44	47	42	47	48	81	129	57	34	33	34	42	39	150	43	41	50	52	70	58	33	29	32	31	36	56	29	34	44	50	57	31
10.5	76	63	64	72	63	153	64	73	66	70	74	96	67	134	134	51	176	50	51	48	53	55	84	132	63	36	36	38	46	47	151	47	48	56	57	75	63	35	32	34	38	42	59	35	41	50	56	64	36
10.75	75	63	64	72	63	154	64	75	68	71	75	96	67	135	135	52	180	51	52	49	54	56	84	136	62	36	36	39	47	47	154	48	49	57	58	76	62	35	33	36	38	43	59	36	42	51	57	65	35
11	72	61	61	69	61	158	63	75	65	71	71	93	63	136	138	49	186	47	50	46	51	53	84	138	60	35	35	37	46	43	156	46	45	54	56	73	60	34	31	34	34	40	58	31	39	47	53	60	32
11.25	71	58	60	67	57	161	58	72	62	68	66	89	62	137	141	47	190	44	46	42	47	47	81	139	59	34	33	35	43	39	158	41	41	50	51	70	59	34	30	33	31	37	56	28	34	44	50	56	30
11.5	70	57	59	66	58	162	58	72	62	68	66	89	62	137	143	46	192	44	47	42	48	48	82	142	58	33	33	35	43	40	159	42	41	50	51	70	59	33	29	32	31	37	56	28	34	45	49	56	29
11.75	75	62	62	71	63	158	63	75	67	71	75	95	65	141	146	52	191	50	51	49	53	56	85	146	63	36	36	39	47	46	161	48	49	56	58	75	63	35	33	34	37	43	59	34	42	50	57	63	35
12	73	61	61	70	61	162	61	74	65	71	71	94	65	142	149	51	194	47	51	48	52	54	85	148	61	35	36	38	46	43	164	47	46	55	56	74	62	35	32	34	34	41	58	32	39	49	53	60	33
12.25	71	59	59	67	58	165	58	74	63	69	66	89	62	142	151	47	199	44	47	42	48	48	81	151	60	34	33	36	44	40	165	42	42	50	51	70	61	34	30	32	31	38	57	28	34	44	50	57	31
12.5	71	59	60	67	59	166	59	74	63	70	67	89	62	145	154	47	200	45	48	42	49	49	82	154	59	34	34	35	44	41	167	43	42	51	52	71	60	34	31	33	33	38	58	29	35	45	50	57	32
12.75	72	60	60	68	59	168	59	74	64	70	68	88	64	146	157	49	203	45	48	43	50	49	82	156	61	36	34	37	45	41	169	44	42	51	52	71	62	34	31	34	33	39	58	29	35	45	51	57	32
13	75	63	61	71	64	163	63	75	67	72	74	95	67	148	158	52	199	51	52	49	53	55	85	159	64	37	36	40	48	47	169	48	49	57	58	75	64	36	33	35	37	44	59	35	42	51	56	63	34
13.25	71	59	59	68	59	169	58	74	64	71	67	89	62	147	161	48	206	45	49	43	49	49	83	161	59	35	34	35	44	40	172	44	42	51	52	71	60	35	31	34	33	37	58	29	35	46	51	57	31
13.5	75	63	61	71	64	164	62	75	67	72	74	95	66	150	163	52	201	51	52	49	54	56	85	165	62	37	36	40	48	47	172	48	49	57	57	75	62	36	33	35	38	43	60	35	42	51	56	64	35
13.75	71	60	59	68	60	169	58	74	63	70	66	88	64	151	168	48	209	45	48	44	50	49	82	165	62	36	34	36	44	40	175	44	42	51	52	71	61	35	30	34	32	39	58	29	34	45	50	57	33
14	74	63	59	72	65	166	62	75	68	72	74	94	65	153	168	52	205	51	52	49	54	56	85	169	63	37	36	40	48	47	175	48	49	57	58	75	64	36	33	35	37	44	60	35	42	50	56	63	34
14.25	72	61	57	69	62	169	60	76	65	71	71	92	64	152	171	50	209	47	52	47	52	53	84	171	61	35	35	37	46	43	178	46	45	54	55	72	61	35	32	33	35	41	59	32	39	48	53	58	32
14.5	70	59	57	68	60	171	58	74	64	71	67	88	63	154	174	48	213	45	48	43	49	48	82	174	60	36	34	36	44	41	179	43	42	51	53	70	61	34	30	33	32	37	58	29	35	46	50	57	31
14.75	71	60	56	68	61	172	58	74	64	70	67	88	63	155	177	47	214	45	48	43	49	48	82	176	60	35	34	35	45	40	180	42	42	50	52	70	60	35	31	33	32	38	59	29	34	46	50	57	31
15	72	60	57	69	61	172	58	75	64	71	68	89	64	157	180	49	216	46	50	43	51	49	84	179	61	36	36	37	45	42	183	45	43	51	53	72	62	35	32	34	34	39	59	30	36	46	51	58	33
15.25	70	59	55	68	60	172	57	74	63	69	67	88	62	156	181	48	216	44	49	43	49	48	83	181	59	35	34	36	44	39	183	43	42	51	52	71	60	34	31	33	33	38	59	28	35	46	49	57	31
15.5	71	59	55	68	61	174	57	74	63	69	67	88	63	157	184	48	217	45	49	43	50	48	83	183	60	35	35	36	44	40	184	43	42	51	53	71	61	35	31	34	33	37	59	29	35	46	51	57	32
15.75	72	60	54	68	63	175	59	76	65	71	70	90	64	158	185	49	218	47	51	45	52	50	84	186	61	36	35	37	46	42	185	45	43	52	54	71	61	35	31	34	34	40	59	31	36	47	52	58	31
16	73	62	55	70	64	172	60	76	66	72	72	93	64	159	186	52	216	48	51	48	52	55	85	188	62	36	36	39	47	44	186	47	47	55	57	74	61	36	32	35	36	41	61	33	40	49	54	59	34
16.25	74	63	56	72	66	171	62	76	68	72	75	95	66	161	187	53	214	51	53	49	55	56	87	190	63	38	37	41	49	47	185	48	50	57	59	76	64	37	34	35	39	44	62	36	42	52	56	62	36
16.5	73	62	54	70	63	173	60	75	66	71	71	93	65	161	190	51	218	48	52	48	52	55	85	192	62	36	35	38	47	44	188	47	47	56	56	74	62	36	32	34	36	41	60	32	40	49	54	60	34
16.75	72	61	53	69	63	177	59	75	65	70	70	90	64	163	192	49	222	47	50	47	53	52	84	195	62	36	35	37	47	43	189	44	44	53	55	72	63	35	32	35	34	40	60	31	38	48	53	58	33
17	71	60	52	69	62	177	57	75	65	70	67	88	64	164	194	49	224	46	50	43	51	49	84	197	61	35	35	37	45	41	189	44	43	51	53	71	61	36	32	35	33	39	59	29	35	47	50	56	33
17.25	71	59	52	68	62	177	57	74	63	69	66	87	63	163	194	48	224	44	48	43	51	48	83	199	60	35	34	36	44	40	189	43	42	50	52	72	60	35	31	34	33	37	59	29	34	45	49	56	31
17.5	71	60	51	68	61	177	56	74	62	69	66	88	63	165	195	47	224	45	49	43	50	48	83	201	60	35	34	37	46	40	191	43	41	50	53	71	60	35	30	33	33	38	59	29	35	46	50	56	31
17.75	71	60	51	68	62	178	56	75	65	70	67	89	63	166	197	48	226	45	50	44	51	50	84	203	60	37	35	36	46	41	192	43	42	51	53	71	60	35	32	34	34	38	60	29	36	46	49	57	32
18	73	63	53	70	63	178	59	76	65	71	70	93	64	168	198	51	225	48	52	47	52	53	85	206	62	37	37	38	46	43	194	46	44	55	56	72	62	37	33	36	36	41	61	32	39	48	52	58	34
18.25	70	59	51	68	62	179	57	74	63	69	67	89	63	167	199	48	227	46	49	43	51	49	83	207	60	35	35	36	45	41	193	43	42	51	53	71	60	35	30	34	33	38	59	30	35	45	50	56	32
18.5	72	61	51	70	64	178	60	75	66	71	71	94	63	168	198	51	225	49	52	48	53	54	86	210	61	35	36	39	47	45	194	47	47	55	57	74	62	35	32	34	37	42	61	33	40	49	53	59	34
18.75	71	59	50	68	62	181	56	75	63	69	66	89	63	168	201	48	230	46	49	43	51	48	84	211	59	36	35	37	45	41	194	44	43	52	53	71	60	35	31	34	34	38	60	29	36	46	51	56	31
19	72	60	51	69	62	181	57	75	65	70	67	90	63	170	201	49	230	46	50	45	51	50	85	213	60	37	35	36	47	42	196	45	43	51	54	71	61	36	32	35	34	38	61	30	36	47	51	56	33
19.25	71	60	50	69	62	182	57	75	64	69	66	90	63	170	202	49	231	46	50	44	53	50	84	215	60	36	36	37	46	42	196	45	44	51	53	71	60	35	32	35	34	38	61	30	35	47	50	57	33
19.5	72	63	52	71	65	180	60	76	67	72	73	95	64	172	202	53	228	50	53	49	54	55	87	217	61	37	36	39	48	46	196	48	48	56	58	74	62	36	34	36	38	42	62	34	42	50	54	60	33
19.75	74	64	53	72	66	179	61	76	68	70	75	96	65	172	201	54	225	52	54	49	55	56	87	218	62	37	37	40	49	48	195	49	49	57	58	74	63	37	34	36	39	44	62	35	43	52	56	61	36
20	71	61	50	69	64	184	58	76	65	70	69	92	64	172	204	50	233	47	51	47	54	52	85	220	62	37	36	37	47	43	197	47	44	53	56	72	61	36	32	35	35	40	61	31	37	48	52	58	33
20.25	71	60	49	69	63	185	56	75	64	69	67	91	63	174	206	49	234	46	50	45	52	50	84	221	61	36	35	37	46	41	198	44	42	51	54	71	61	36	32	35	34	38	60	31	36	47	50	56	32
20.5	70	59	49	68	62	185	55	74	63	68	66	89	63	174	206	48	234	45	50	44	51	49	84	222	59	36	35	36	46	40	199	44	43	51	54	70	60	35	32	35	34	38	60	30	35	46	49	55	32
20.75	71	59	49	68	62	186	56	75	63	68	66	90	62	175	207	48	235	46	49	43	52	49	84	223	60	36	35	36	46	40	198	44	42	51	53	70	59	35	31	35	33	38	60	29	35	46	49	55	32
21	71	60	49	69	62	187	57	76	63	68	67	90	62	175	207	49	236	46	50	45	52	49	85	225	60	37	35	38	46	42	200	44	44	52	54	71	61	35	31	36	35	38	61	30	35	47	50	55	32
21.25	74	63	53	72	66	183	60	76	67	70	74	97	66	176	205	54	229	52	53	50	56	56	87	226	63	37	37	41	49	48	198	49	49	57	59	75	63	37	34	37	39	44	63	36	43	53	55	61	36
21.5	71	59	49	68	63	187	56	75	63	68	66	91	63	177	208	49	236	46	49	44	52	49	84	228	60	36	35	38	46	41	201	45	43	51	55	70	60	36	31	35	34	39	61	29	35	46	49	56	31
21.75	72	62	52	70	65	189	59	76	65	70	70	92	64	179	209	52	236	48	52	48	54	53	86	230	61	38	37	39	48	44	202	47	45	54	56	72	62	37	34	36	37	42	63	32	38	48	52	57	35
22	70	60	48	68	63	189	56	75	63	68	66	91	62	178	210	49	237	46	50	44	53	50	84	230	59	36	35	37	46	42	202	45	43	51	54	71	60	36	31	35	34	39	61	30	36	47	49	56	33
22.25	71	60	49	68	63	190	55	75	63	68	66	90	63	180	210	49	239	46	50	44	53	49	84	232	60	37	35	37	46	41	202	44	43	51	54	71	60	35	31	35	35	39	61	29	35	47	49	56	33
22.5	72	61	49	69	64	191	56	75	63	69	67	90	64	180	211	50	239	47	50	45	54	50	85	234	60	37	36	37	46	42	203	45	44	52	55	71	61	37	32	37	36	39	62	31	36	48	50	58	34
22.75	71	60	49	69	62	191	55	75	63	67	66	91	62	180	211	50	239	46	49	44	52	50	84	234	60	36	36	36	47	42	203	45	44	51	55	71	60	36	32	35	34	38	61	30	35	47	49	56	32
23	71	60	49	68	63	192	55	76	63	68	66	91	62	181	212	50	240	46	50	45	53	50	85	235	60	37	36	37	46	42	203	45	43	53	55	71	60	36	32	36	34	38	61	30	36	47	49	56	33
23.25	71	59	48	68	63	193	56	76	62	69	67	91	63	182	212	49	240	47	49	45	53	50	85	237	59	36	36	37	47	42	204	45	44	52	55	72	60	36	32	35	35	39	61	30	36	47	50	56	34
23.5	73	62	49	70	65	194	58	76	65	70	69	93	65	184	213	51	241	49	52	47	56	53	87	238	62	38	37	38	48	45	205	47	45	55	57	72	61	37	34	36	37	41	63	33	38	49	52	58	34
23.75	75	64	53	73	67	189	60	77	68	69	74	96	65	183	211	55	234	53	54	50	56	57	88	239	62	39	38	41	51	49	203	49	50	57	61	76	63	37	35	37	40	45	64	36	43	52	55	61	36
Data File	J:\Service\Customer\400\411\data\assays\10001\cspp_SIDx6422x166180___2_37_001_209_Janx15x2013_A_01B.oka
Set up Time	Jan 15 2013 2:37 PM
Position	1-B
Plate Type	PM02-A
Strain Type	NOT APPLICABLE
Sample Number
Strain Name	Cspp
Strain Number	SID_6422_166180
Other
Hour	A01	A02	A03	A04	A05	A06	A07	A08	A09	A10	A11	A12	B01	B02	B03	B04	B05	B06	B07	B08	B09	B10	B11	B12	C01	C02	C03	C04	C05	C06	C07	C08	C09	C10	C11	C12	D01	D02	D03	D04	D05	D06	D07	D08	D09	D10	D11	D12	E01
0	42	39	23	30	22	27	25	32	26	41	31	49	38	22	15	21	26	12	14	13	31	21	30	36	33	15	9	11	17	10	7	12	9	21	19	23	32	10	7	6	5	2	6	0	10	13	18	17	50
0.25	43	41	25	34	29	35	33	40	35	48	42	62	43	22	17	26	32	20	24	21	39	32	41	53	34	16	10	14	19	22	11	22	29	35	28	34	36	11	9	8	14	8	12	7	23	21	27	25	44
0.5	55	50	32	42	37	40	39	45	41	51	49	66	55	31	26	35	39	28	29	27	42	36	46	46	47	25	20	23	29	29	20	27	32	43	36	41	50	19	17	17	25	17	18	12	29	28	33	32	52
0.75	53	46	31	44	37	43	41	46	43	53	50	69	52	29	24	33	39	28	29	28	42	37	48	44	45	23	17	22	27	31	17	28	36	42	39	41	50	17	15	15	19	16	18	13	25	29	34	33	45
1	52	46	28	35	32	40	34	40	35	47	40	62	53	29	21	28	35	17	24	20	34	29	42	39	45	22	15	18	25	27	13	25	41	28	36	34	40	17	13	14	14	11	15	7	19	22	25	26	44
1.25	54	47	30	37	34	42	35	42	38	48	43	63	53	31	22	30	37	20	27	21	37	31	44	41	47	23	16	18	27	23	14	27	39	30	37	37	43	19	14	14	17	13	16	9	21	25	28	29	43
1.5	54	48	31	39	35	45	37	44	38	50	45	66	55	33	23	31	39	21	27	22	37	32	45	42	47	23	18	20	28	27	15	29	39	32	38	38	43	18	16	17	18	14	19	10	22	26	28	30	44
1.75	56	47	34	41	37	51	41	47	41	53	50	74	53	33	23	31	41	22	29	24	39	34	51	42	48	23	17	20	28	29	16	31	39	34	40	40	43	19	15	16	18	15	21	11	22	27	31	32	45
2	66	52	44	51	48	59	51	54	53	62	64	83	58	39	28	40	50	33	37	34	43	44	62	50	57	30	25	30	35	38	26	38	49	45	49	47	51	23	24	24	29	23	30	20	32	38	41	41	53
2.25	65	50	45	51	48	65	51	57	51	63	59	79	60	39	26	39	54	30	37	29	40	41	67	45	55	27	26	29	36	38	29	39	46	44	49	48	52	25	25	23	28	23	34	19	27	36	39	39	52
2.5	66	50	47	54	51	71	54	62	57	67	66	83	58	40	29	42	59	36	39	34	43	46	73	52	56	28	26	30	36	41	37	40	50	48	54	56	52	24	26	23	31	29	38	22	33	39	44	47	50
2.75	64	46	45	50	46	76	49	64	51	63	58	77	58	41	24	36	60	30	35	26	39	39	73	44	54	25	23	27	33	40	38	39	46	42	52	55	49	22	22	21	26	24	38	18	24	34	39	42	46
3	62	46	45	50	46	81	50	66	52	63	59	77	57	43	25	36	63	30	35	27	39	39	75	45	54	26	23	26	33	40	43	39	46	43	52	55	49	22	22	20	25	23	39	17	24	35	39	43	40
3.25	62	45	45	49	46	84	49	67	51	64	59	77	56	43	26	36	65	30	34	26	38	37	73	44	53	25	23	25	33	41	49	41	47	41	52	55	48	23	22	20	26	23	38	18	24	34	39	42	38
3.5	62	45	45	50	47	89	50	67	53	65	60	78	56	45	28	36	65	30	35	26	39	38	75	46	55	25	23	25	32	41	53	41	47	42	52	56	48	22	21	20	26	23	39	17	25	34	40	43	35
3.75	62	47	46	50	48	93	50	67	53	64	59	78	57	46	30	37	67	30	35	27	38	37	76	46	56	25	23	26	32	42	59	41	48	42	53	55	50	24	22	19	25	23	39	17	24	34	40	43	34
4	62	47	46	50	48	97	50	68	54	65	58	79	56	48	33	38	67	31	35	27	39	39	77	48	56	26	24	26	33	44	65	43	49	43	53	56	50	25	22	21	26	24	40	18	25	33	41	44	34
4.25	62	46	44	51	49	100	51	67	54	65	60	79	57	50	35	37	67	31	36	27	40	39	78	49	58	25	23	26	33	43	68	43	48	43	54	57	51	25	22	20	26	24	40	18	25	33	42	45	33
4.5	63	49	47	52	51	103	52	68	55	66	60	77	57	53	38	40	68	31	36	28	40	39	79	52	59	26	24	28	34	45	74	44	49	43	56	57	51	26	23	21	26	25	39	18	25	32	42	45	32
4.75	68	54	50	57	58	105	58	69	60	69	68	83	58	58	44	42	71	37	42	36	45	47	83	60	62	29	28	33	37	45	79	47	56	50	60	61	54	30	27	24	33	31	44	24	34	37	49	51	36
5	64	49	47	52	52	109	53	69	55	66	61	77	56	56	43	36	69	31	37	28	40	40	81	57	60	26	25	28	33	45	82	45	51	43	55	57	51	27	23	20	27	26	40	17	25	30	44	45	31
5.25	65	48	47	53	54	111	53	69	55	66	60	77	56	60	46	36	71	32	37	29	40	41	83	60	62	25	24	28	34	45	87	45	55	45	56	58	52	27	23	20	27	25	41	18	25	32	45	46	32
5.5	64	48	48	52	53	114	53	69	54	66	60	76	56	61	49	35	74	31	37	28	40	39	84	64	61	26	25	28	34	46	92	44	55	44	56	57	52	28	23	21	27	26	41	18	25	30	44	45	32
5.75	65	50	48	53	55	117	54	70	57	66	62	76	55	65	53	36	76	32	38	29	41	41	85	68	62	27	25	28	35	47	95	44	57	44	57	59	52	28	23	21	28	25	42	19	26	32	47	47	32
6	66	49	48	53	53	119	54	69	56	67	62	75	55	67	56	36	79	32	37	29	41	40	87	70	62	26	25	28	34	45	99	44	56	44	57	59	52	29	23	20	28	26	41	18	26	32	47	47	32
6.25	66	50	48	54	53	120	55	68	57	67	63	75	55	70	60	37	83	34	38	30	41	41	89	73	63	27	25	29	35	46	102	44	53	45	58	59	53	28	23	21	27	27	42	19	26	32	49	48	31
6.5	65	50	48	53	53	122	54	68	56	67	62	74	53	72	64	36	86	33	38	29	41	39	89	75	63	26	25	28	34	47	106	42	52	44	56	59	52	29	23	20	27	26	43	19	25	31	47	46	31
6.75	69	56	52	59	59	122	60	69	62	71	70	81	56	79	70	44	94	40	44	38	46	48	93	80	68	30	30	34	40	47	108	48	59	50	63	63	56	33	29	25	34	33	46	24	34	39	54	55	36
[truncated: 4,104 more rows]
[truncated: 47 more columns]
